# Supplementary material for: Pericyclic reaction benchmarks: hierarchical computations targeting CCSDT(Q)/CBS and analysis of DFT performance
Source: Royal Society of Chemistry journal article supplement (doi:10.1039/d2cp02234f), 2022-01-01
Supplement: d2cp02234f1.pdf [file d2cp02234f1.pdf]

Supporting Information for

## Pericyclic Reactions: Hierarchical Benchmark up to CCSDT(Q)/CBS and DFT Performance Study

Pascal Vermeeren,<sup>+</sup> <sup>a</sup> Marco Dalla Tiezza,<sup>+</sup> <sup>a</sup> Mark E. Wolf,<sup>+</sup> <sup>b</sup> Mitchell E. Lahm,<sup>+</sup> <sup>b</sup> Wesley D. Allen,<sup>\*</sup> <sup>b,c</sup> Henry F. Schaefer III,<sup>\*</sup> <sup>b</sup> Trevor A. Hamlin,<sup>\*</sup> <sup>a</sup> F. Matthias Bickelhaupt<sup>\*</sup> <sup>a,d</sup>

<sup>a</sup> Department of Theoretical Chemistry, Amsterdam Institute of Molecular and Life Sciences (AIMMS), Amsterdam Center for Multiscale Modeling (ACMM), Vrije Universiteit Amsterdam, De Boelelaan 1083, 1081 HV Amsterdam, The Netherlands. E-mail: t.a.hamlin@vu.nl; f.m.bickelhaupt@vu.nl

<sup>b</sup> Center for Computational Quantum Chemistry, University of Georgia, Athens, GA 30602, United States. E-mail: ccq@uga.edu

<sup>c</sup> Allen Heritage Foundation, Dickson, TN 37055, United States.

<sup>d</sup> Institute for Molecules and Materials (IMM), Radboud University, Heyendaalseweg 135, 6525 AJ Nijmegen, The Netherlands.

+ These authors contributed equally to this work.

## Contents

**Table S1.** Harmonic vibrational frequencies for all structures at CCSD(T)/cc-pVTZ in  $\text{cm}^{-1}$ .

**Table S2.** Focal point analysis in  $\text{kcal mol}^{-1}$  with values computed atop CCSD(T)/cc-pVTZ geometries.

**Table S3.** Cartesian coordinates (in  $\text{\AA}$ ), energies (in Hartree), and number of imaginary frequencies of all stationary points, computed at CCSD(T)/cc-pVTZ.

**Table S4.** Cartesian coordinates (in  $\text{\AA}$ ), energies (in  $\text{kcal mol}^{-1}$ ), and number of imaginary frequencies of all stationary points, computed at BP86/DZ.

**Table S5.** Cartesian coordinates (in  $\text{\AA}$ ), energies (in  $\text{kcal mol}^{-1}$ ), and number of imaginary frequencies of all stationary points, computed at BP86/DZP.

**Table S6.** Cartesian coordinates (in  $\text{\AA}$ ), energies (in  $\text{kcal mol}^{-1}$ ), and number of imaginary frequencies of all stationary points, computed at BP86/TZ2P.

**Table S7.** Cartesian coordinates (in  $\text{\AA}$ ), energies (in  $\text{kcal mol}^{-1}$ ), and number of imaginary frequencies of all stationary points, computed at BP86/QZ4P.

**Table S8.** Cartesian coordinates (in  $\text{\AA}$ ), energies (in  $\text{kcal mol}^{-1}$ ), and number of imaginary frequencies of all stationary points, computed at BP86-D3(BJ)/QZ4P.

**Table S9.** Global-minimum Cartesian root-mean-square deviation (RMSD) values (in  $\text{\AA}$ ) of the fully optimized geometries at various DFT levels of theory with respect to the CCSD(T)/cc-pVTZ benchmarks.

**Table S10.** Average percentage errors of all chemically meaningful geometric parameters of the fully optimized DFT geometries with respect to the CCSD(T)/cc-pVTZ benchmarks.

**Table S11.** Errors in reaction barriers and reaction energies ( $\text{kcal mol}^{-1}$ ) for the various pericyclic reactions, computed with XC/QZ4P//CCSD(T)/cc-pVTZ, compared to CCSDT(Q)/CBS//CCSD(T)/cc-pVTZ.

**Table S12.** Reaction barriers and reaction energies ( $\text{kcal mol}^{-1}$ ) for the various pericyclic reactions, computed at DFT level using Method/BS, where Method = BP86, BP86-D3(BJ) and BS = DZ, DZP, TZ2P, QZ4P.

**Table S13.** Reaction barriers and reaction energies ( $\text{kcal mol}^{-1}$ ) for the various pericyclic reactions, computed with XC/TZ2P//CCSD(T)/cc-pVTZ.

**Table S14.** Errors in reaction barriers and reaction energies ( $\text{kcal mol}^{-1}$ ) for the various pericyclic reactions, computed with XC/TZ2P//CCSD(T)/cc-pVTZ, compared to CCSDT(Q)/CBS//CCSD(T)/cc-pVTZ.

**Table S15.** Mean error (ME), mean absolute error (MAE), maximum unsigned error (MUE) and standard deviation (SD) of reaction barriers and energies (kcal mol<sup>-1</sup>) for the various pericyclic reactions, computed with XC/TZ2P//CCSD(T)/cc-pVTZ compared to CCSDT(Q)/CBS//CCSD(T)/cc-pVTZ.

**Table S16.** Reaction barriers and reaction energies (kcal mol<sup>-1</sup>) for the various pericyclic reactions, computed with XC/TZ2P//BP86/DZ.

**Table S17.** Errors in reaction barriers and reaction energies (kcal mol<sup>-1</sup>) for the various pericyclic reactions, computed with XC/TZ2P//BP86/DZ, compared to CCSDT(Q)/CBS//CCSD(T)/cc-pVTZ.

**Table S18.** Mean error (ME), mean absolute error (MAE), maximum unsigned error (MUE) and standard deviation (SD) of reaction barriers and energies (kcal mol<sup>-1</sup>) for the various pericyclic reactions, computed with XC/TZ2P//BP86/DZ compared to CCSDT(Q)/CBS//CCSD(T)/cc-pVTZ.

**Table S19.** Reaction barriers and reaction energies (kcal mol<sup>-1</sup>) for the various pericyclic reactions, computed with XC/QZ4P//BP86/DZ.

**Table S20.** Errors in reaction barriers and reaction energies (kcal mol<sup>-1</sup>) for the various pericyclic reactions, computed with XC/QZ4P//BP86/DZ, compared to CCSDT(Q)/CBS//CCSD(T)/cc-pVTZ.

**Table S21.** Mean error (ME), mean absolute error (MAE), maximum unsigned error (MUE) and standard deviation (SD) of reaction barriers and energies (kcal mol<sup>-1</sup>) for the various pericyclic reactions, computed with XC/QZ4P//BP86/DZ compared to CCSDT(Q)/CBS//CCSD(T)/cc-pVTZ.

**Table S22.** Reaction barriers and reaction energies (kcal mol<sup>-1</sup>) for the various pericyclic reactions, computed with XC/TZ2P//BP86/DZP.

**Table S23.** Errors in reaction barriers and reaction energies (kcal mol<sup>-1</sup>) for the various pericyclic reactions, computed with XC/TZ2P//BP86/DZP, compared to CCSDT(Q)/CBS//CCSD(T)/cc-pVTZ.

**Table S24.** Mean error (ME), mean absolute error (MAE), maximum unsigned error (MUE) and standard deviation (SD) of reaction barriers and energies (kcal mol<sup>-1</sup>) for the various pericyclic reactions, computed with XC/TZ2P//BP86/DZP compared to CCSDT(Q)/CBS//CCSD(T)/cc-pVTZ.

**Table S25.** Reaction barriers and reaction energies (kcal mol<sup>-1</sup>) for the various pericyclic reactions, computed with XC/QZ4P//BP86/DZP.

**Table S26.** Errors in reaction barriers and reaction energies (kcal mol<sup>-1</sup>) for the various pericyclic reactions, computed with XC/QZ4P//BP86/DZP, compared to CCSDT(Q)/CBS//CCSD(T)/cc-pVTZ.

**Table S27.** Mean error (ME), mean absolute error (MAE), maximum unsigned error (MUE) and standard deviation (SD) of reaction barriers and energies (kcal mol<sup>-1</sup>) for the various pericyclic reactions, computed with XC/QZ4P//BP86/DZP compared to CCSDT(Q)/CBS//CCSD(T)/cc-pVTZ.

**Table S28.** Reaction barriers and reaction energies (kcal mol<sup>-1</sup>) for the various pericyclic reactions, computed with XC/TZ2P//BP86/TZ2P.

**Table S29.** Errors in reaction barriers and reaction energies (kcal mol<sup>-1</sup>) for the various pericyclic reactions, computed with XC/TZ2P//BP86/TZ2P, compared to CCSDT(Q)/CBS//CCSD(T)/cc-pVTZ.

**Table S30.** Mean error (ME), mean absolute error (MAE), maximum unsigned error (MUE) and standard deviation (SD) of reaction barriers and energies (kcal mol<sup>-1</sup>) for the various pericyclic reactions, computed with XC/TZ2P//BP86/TZ2P compared to CCSDT(Q)/CBS//CCSD(T)/cc-pVTZ.

**Table S31.** Reaction barriers and reaction energies (kcal mol<sup>-1</sup>) for the various pericyclic reactions, computed with XC/QZ4P//BP86/TZ2P.

**Table S32.** Errors in reaction barriers and reaction energies (kcal mol<sup>-1</sup>) for the various pericyclic reactions, computed with XC/QZ4P//BP86/TZ2P, compared to CCSDT(Q)/CBS//CCSD(T)/cc-pVTZ.

**Table S33.** Mean error (ME), mean absolute error (MAE), maximum unsigned error (MUE) and standard deviation (SD) of reaction barriers and energies (kcal mol<sup>-1</sup>) for the various pericyclic reactions, computed with XC/QZ4P//BP86/TZ2P compared to CCSDT(Q)/CBS//CCSD(T)/cc-pVTZ.

**Table S34.** Reaction barriers and reaction energies (kcal mol<sup>-1</sup>) for the various pericyclic reactions, computed with XC/TZ2P//BP86/QZ4P.

**Table S35.** Errors in reaction barriers and reaction energies (kcal mol<sup>-1</sup>) for the various pericyclic reactions, computed with XC/TZ2P//BP86/QZ4P, compared to CCSDT(Q)/CBS//CCSD(T)/cc-pVTZ.

**Table S36.** Mean error (ME), mean absolute error (MAE), maximum unsigned error (MUE) and standard deviation (SD) of reaction barriers and energies (kcal mol<sup>-1</sup>) for the various pericyclic reactions, computed with XC/TZ2P//BP86/QZ4P compared to CCSDT(Q)/CBS//CCSD(T)/cc-pVTZ.

**Table S37.** Reaction barriers and reaction energies (kcal mol<sup>-1</sup>) for the various pericyclic reactions, computed with XC/QZ4P//BP86/QZ4P.

**Table S38.** Errors in reaction barriers and reaction energies (kcal mol<sup>-1</sup>) for the various pericyclic reactions, computed with XC/QZ4P//BP86/QZ4P, compared to CCSDT(Q)/CBS//CCSD(T)/cc-pVTZ.

**Table S39.** Mean error (ME), mean absolute error (MAE), maximum unsigned error (MUE) and standard deviation (SD) of reaction barriers and energies (kcal mol<sup>-1</sup>) for the various pericyclic reactions, computed with XC/QZ4P//BP86/QZ4P compared to CCSDT(Q)/CBS//CCSD(T)/cc-pVTZ.

**Table S40.** Reaction barriers and reaction energies (kcal mol<sup>-1</sup>) for the various pericyclic reactions, computed with XC/TZ2P//BP86-D3(BJ)/QZ4P.

**Table S41.** Errors in reaction barriers and reaction energies (kcal mol<sup>-1</sup>) for the various pericyclic reactions, computed with XC/TZ2P//BP86-D3(BJ)/QZ4P, compared to CCSDT(Q)/CBS//CCSD(T)/cc-pVTZ.

**Table S42.** Mean error (ME), mean absolute error (MAE), maximum unsigned Error (MUE) and standard deviation (SD) of reaction barriers and energies (kcal mol<sup>-1</sup>) for the various pericyclic reactions, computed with XC/TZ2P//BP86-D3(BJ)/QZ4P compared to CCSDT(Q)/CBS//CCSD(T)/cc-pVTZ.

**Table S43.** Reaction barriers and reaction energies (kcal mol<sup>-1</sup>) for the various pericyclic reactions, computed with XC/QZ4P//BP86-D3(BJ)/QZ4P.

**Table S44.** Errors in reaction barriers and reaction energies (kcal mol<sup>-1</sup>) for the various pericyclic reactions, computed with XC/TZ2P//BP86-D3(BJ)/QZ4P, compared to CCSDT(Q)/CBS//CCSD(T)/cc-pVTZ.

**Table S45.** Mean error (ME), mean absolute error (MAE), maximum unsigned error (MUE) and standard deviation (SD) of reaction barriers and energies (kcal mol<sup>-1</sup>) for the various pericyclic reactions, computed with XC/QZ4P//BP86-D3(BJ)/QZ4P compared to CCSDT(Q)/CBS//CCSD(T)/cc-pVTZ.

**Table S46.** Multireference diagnostics for each of the pericyclic stationary points at the CCSD(T)/cc-pVTZ level of theory

**Table S47.** Standard Dunning basis raw electronic energies atop the CCSD(T)/cc-pVTZ structures for use in Focal Point analysis.

**Table S48.** Aug' basis raw electronic energies atop the CCSD(T)/cc-pVTZ structures for use in Focal Point analysis.

**Table S1.** Harmonic vibrational frequencies for all structures at CCSD(T)/cc-pVTZ in cm<sup>-1</sup>

| <b>Diels-Alder</b> |        |        |        | <b>1,3-Dipolar cycloaddition</b> |           |          | <b>Electrocyclic rearrangement</b> |        |
|--------------------|--------|--------|--------|----------------------------------|-----------|----------|------------------------------------|--------|
| B                  | E      | TS-DA  | P-DA   | MA                               | TS-1,3-DC | P-1,3-DC | TS-ER                              | P-ER   |
| 164.8              | 823.0  | 618.9i | 168.2  | 111.4                            | 515.2i    | 167.4    | 760.0i                             | 302.3  |
| 271.9              | 941.9  | 132.8  | 277.3  | 243.7                            | 106.7     | 195.6    | 453.0                              | 644.5  |
| 467.0              | 966.7  | 206.9  | 395.1  | 574.4                            | 153.6     | 293.1    | 641.5                              | 856.5  |
| 610.1              | 1047.0 | 282.9  | 445.6  | 669.7                            | 169.6     | 346.6    | 674.3                              | 865.0  |
| 742.4              | 1242.1 | 380.0  | 492.9  | 934.2                            | 247.1     | 547.5    | 730.8                              | 895.6  |
| 886.4              | 1369.0 | 399.7  | 649.5  | 1111.2                           | 359.0     | 633.4    | 875.7                              | 901.9  |
| 927.7              | 1479.0 | 482.6  | 727.5  | 1150.1                           | 452.6     | 741.9    | 876.8                              | 916.4  |
| 929.6              | 1671.7 | 575.4  | 820.8  | 1303.7                           | 556.3     | 876.7    | 908.8                              | 1002.3 |
| 998.6              | 3139.1 | 620.3  | 836.1  | 1446.6                           | 652.2     | 886.4    | 939.0                              | 1029.9 |
| 1017.2             | 3157.1 | 691.2  | 892.5  | 1503.2                           | 663.7     | 940.9    | 1008.3                             | 1099.9 |
| 1058.6             | 3219.3 | 770.1  | 916.0  | 1504.7                           | 831.5     | 976.6    | 1029.6                             | 1134.8 |
| 1098.9             | 3246.1 | 790.9  | 933.8  | 2179.9                           | 871.9     | 1021.8   | 1121.0                             | 1176.5 |
| 1301.5             |        | 841.9  | 984.7  | 3030.0                           | 931.8     | 1093.8   | 1163.1                             | 1219.2 |
| 1333.3             |        | 890.7  | 1019.8 | 3097.5                           | 1001.1    | 1141.4   | 1232.2                             | 1232.8 |
| 1437.3             |        | 937.6  | 1055.0 | 3162.7                           | 1024.0    | 1173.6   | 1381.7                             | 1323.5 |
| 1468.4             |        | 961.0  | 1084.4 |                                  | 1115.4    | 1191.2   | 1514.5                             | 1470.9 |
| 1666.8             |        | 966.6  | 1097.2 |                                  | 1156.4    | 1265.1   | 1520.8                             | 1493.9 |
| 1674.9             |        | 977.5  | 1155.1 |                                  | 1241.7    | 1282.2   | 1533.1                             | 1604.9 |
| 3143.1             |        | 995.9  | 1160.1 |                                  | 1268.2    | 1310.7   | 3094.1                             | 3052.2 |
| 3145.6             |        | 1001.3 | 1248.9 |                                  | 1300.6    | 1365.8   | 3094.4                             | 3058.2 |
| 3152.1             |        | 1091.8 | 1270.3 |                                  | 1439.6    | 1445.5   | 3168.7                             | 3097.0 |
| 3164.7             |        | 1097.4 | 1297.0 |                                  | 1472.9    | 1483.5   | 3189.6                             | 3111.4 |
| 3237.2             |        | 1229.3 | 1350.1 |                                  | 1497.5    | 1493.8   | 3218.7                             | 3181.9 |
| 3238.9             |        | 1242.7 | 1375.9 |                                  | 1504.3    | 1511.5   | 3219.5                             | 3213.7 |
|                    |        | 1260.7 | 1378.5 |                                  | 1565.8    | 1520.4   |                                    |        |
|                    |        | 1300.6 | 1386.1 |                                  | 1884.6    | 1553.5   |                                    |        |
|                    |        | 1427.9 | 1422.8 |                                  | 3025.0    | 2982.0   |                                    |        |
|                    |        | 1471.5 | 1479.0 |                                  | 3103.7    | 2994.3   |                                    |        |
|                    |        | 1490.5 | 1486.6 |                                  | 3141.0    | 3057.1   |                                    |        |
|                    |        | 1541.3 | 1492.4 |                                  | 3143.4    | 3099.9   |                                    |        |
|                    |        | 1584.8 | 1502.9 |                                  | 3160.8    | 3127.1   |                                    |        |
|                    |        | 1585.8 | 1700.8 |                                  | 3227.1    | 3145.2   |                                    |        |
|                    |        | 3142.3 | 3011.3 |                                  | 3253.8    | 3151.1   |                                    |        |
|                    |        | 3146.6 | 3011.3 |                                  |           |          |                                    |        |
|                    |        | 3147.7 | 3022.0 |                                  |           |          |                                    |        |
|                    |        | 3158.5 | 3026.8 |                                  |           |          |                                    |        |
|                    |        | 3159.3 | 3057.5 |                                  |           |          |                                    |        |
|                    |        | 3178.3 | 3057.9 |                                  |           |          |                                    |        |
|                    |        | 3224.8 | 3078.0 |                                  |           |          |                                    |        |
|                    |        | 3231.0 | 3080.2 |                                  |           |          |                                    |        |
|                    |        | 3232.9 | 3144.1 |                                  |           |          |                                    |        |
|                    |        | 3249.9 | 3169.6 |                                  |           |          |                                    |        |

| <b>Sigmatropic rearrangement</b> |         | <b>Double Group Transfer</b> |         |
|----------------------------------|---------|------------------------------|---------|
| TS-DA                            | P-DA    | Et                           | TS-DGT  |
| 111.1                            | 1690.1i | 310.1                        | 1780.0i |
| 177.8                            | 260.4   | 820.9                        | 170.0   |
| 247.2                            | 469.8   | 820.9                        | 339.3   |
| 325.4                            | 507.6   | 1013.9                       | 494.5   |
| 419.0                            | 549.0   | 1224.8                       | 503.4   |
| 583.2                            | 617.3   | 1224.8                       | 512.1   |
| 703.3                            | 738.1   | 1406.5                       | 550.4   |
| 767.6                            | 793.3   | 1427.5                       | 705.4   |
| 886.0                            | 808.4   | 1510.8                       | 811.0   |
| 929.5                            | 968.7   | 1510.8                       | 836.7   |
| 961.6                            | 975.9   | 1512.5                       | 868.6   |
| 985.2                            | 997.3   | 1512.5                       | 967.7   |
| 1016.8                           | 1001.5  | 3038.0                       | 992.1   |
| 1061.2                           | 1005.0  | 3039.6                       | 1017.1  |
| 1078.3                           | 1093.7  | 3096.9                       | 1107.9  |
| 1117.0                           | 1129.7  | 3096.9                       | 1226.0  |
| 1264.4                           | 1176.4  | 3120.1                       | 1237.8  |
| 1322.4                           | 1249.4  | 3120.1                       | 1245.5  |
| 1397.9                           | 1266.5  |                              | 1380.0  |
| 1434.5                           | 1376.1  |                              | 1387.0  |
| 1465.8                           | 1430.5  |                              | 1414.4  |
| 1495.8                           | 1483.5  |                              | 1414.5  |
| 1498.3                           | 1517.6  |                              | 1417.6  |
| 1671.8                           | 1528.4  |                              | 1461.1  |
| 1690.0                           | 1543.9  |                              | 1503.2  |
| 3028.1                           | 1590.7  |                              | 1513.3  |
| 3086.6                           | 3105.7  |                              | 1525.7  |
| 3123.6                           | 3105.9  |                              | 1545.6  |
| 3136.4                           | 3149.5  |                              | 3111.0  |
| 3143.2                           | 3154.0  |                              | 3111.2  |
| 3153.9                           | 3174.2  |                              | 3123.6  |
| 3165.1                           | 3180.3  |                              | 3125.1  |
| 3238.4                           | 3189.5  |                              | 3185.3  |
|                                  |         |                              | 3185.7  |
|                                  |         |                              | 3205.2  |
|                                  |         |                              | 3207.1  |

**Table S2.** Focal point analysis in kcal mol<sup>-1</sup> with values computed atop CCSD(T)/cc-pVTZ geometries.

## Reaction Energies

| <b>Diels Alder Reaction (Trans-butadiene + Ethylene → Cycloadduct)</b>                                                                                                                                                                                                                                                                                              |                         |                 |                  |                     |                      |          |
|---------------------------------------------------------------------------------------------------------------------------------------------------------------------------------------------------------------------------------------------------------------------------------------------------------------------------------------------------------------------|-------------------------|-----------------|------------------|---------------------|----------------------|----------|
|                                                                                                                                                                                                                                                                                                                                                                     | $\Delta E_c(\text{HF})$ | $+\delta$ [MP2] | $+\delta$ [CCSD] | $+\delta$ [CCSD(T)] | $+\delta$ [CCSDT(Q)] | NET      |
| cc-pVDZ                                                                                                                                                                                                                                                                                                                                                             | -39.40                  | -12.34          | +5.19            | +0.53               | +0.37+0.15           | -45.51   |
| aug'-cc-pVDZ                                                                                                                                                                                                                                                                                                                                                        | -38.74                  | -12.11          | +4.54            | +0.56               | [+0.52]              | [-45.24] |
| aug'-cc-pVTZ                                                                                                                                                                                                                                                                                                                                                        | -35.33                  | -14.53          | +4.38            | +0.50               | [+0.52]              | [-44.46] |
| aug'-cc-pVQZ                                                                                                                                                                                                                                                                                                                                                        | -35.14                  | -14.54          | +4.31            | +0.47               | [+0.52]              | [-44.39] |
| aug'-cc-pV5Z                                                                                                                                                                                                                                                                                                                                                        | -35.08                  | -14.67          | [+4.40]          | [+0.46]             | [+0.52]              | [-44.37] |
| CBS LIMIT                                                                                                                                                                                                                                                                                                                                                           | [-35.06]                | [-14.80]        | [+4.50]          | [+0.45]             | [+0.52]              | [-44.39] |
| <b>Diels-Alder Reaction</b>                                                                                                                                                                                                                                                                                                                                         |                         |                 |                  |                     |                      |          |
|                                                                                                                                                                                                                                                                                                                                                                     | $\Delta E_c(\text{HF})$ | $+\delta$ [MP2] | $+\delta$ [CCSD] | $+\delta$ [CCSD(T)] | $+\delta$ [CCSDT(Q)] | NET      |
| cc-pVDZ                                                                                                                                                                                                                                                                                                                                                             | -42.71                  | -11.94          | +5.26            | +0.45               | +0.35+0.14           | -48.46   |
| cc-pVTZ                                                                                                                                                                                                                                                                                                                                                             | -39.29                  | -13.41          | +4.77            | +0.42               | [+0.49]              | [-47.03] |
| cc-pVQZ                                                                                                                                                                                                                                                                                                                                                             | -38.79                  | -13.91          | +4.50            | +0.43               | [+0.49]              | [-47.28] |
| cc-pV5Z                                                                                                                                                                                                                                                                                                                                                             | -38.60                  | -14.06          | [+4.41]          | [+0.43]             | [+0.49]              | [-47.36] |
| CBS LIMIT                                                                                                                                                                                                                                                                                                                                                           | [-38.51]                | [-14.23]        | [+4.31]          | [+0.43]             | [+0.49]              | [-47.50] |
| $\Delta E_{\text{final}} = \Delta E_c(\text{FPA}) + \Delta(\text{DBOC}) + \Delta(\text{rel}) + \Delta(\text{core}) + \Delta(\text{aug})$<br>$\Delta E_{\text{final}} = -47.50 + 0.02 + 0.13 - 0.21 + 0.19 = -47.37 \text{ kcal mol}^{-1}$<br>$\Delta E_0 = \Delta E_{\text{final}} + \Delta\text{ZPVE}(\text{harm}) = -47.37 + 6.75 = -40.62 \text{ kcal mol}^{-1}$ |                         |                 |                  |                     |                      |          |
| <b>1,3-dipolar Cycloaddition</b>                                                                                                                                                                                                                                                                                                                                    |                         |                 |                  |                     |                      |          |
|                                                                                                                                                                                                                                                                                                                                                                     | $\Delta E_c(\text{HF})$ | $+\delta$ [MP2] | $+\delta$ [CCSD] | $+\delta$ [CCSD(T)] | $+\delta$ [CCSDT(Q)] | NET      |
| cc-pVDZ                                                                                                                                                                                                                                                                                                                                                             | -30.34                  | +6.08           | -5.92            | +1.85               | +0.11+0.65           | -27.56   |
| cc-pVTZ                                                                                                                                                                                                                                                                                                                                                             | -26.87                  | +2.79           | -5.58            | +1.60               | [+0.76]              | [-27.29] |
| cc-pVQZ                                                                                                                                                                                                                                                                                                                                                             | -26.71                  | +1.87           | -5.64            | +1.55               | [+0.76]              | [-28.17] |
| cc-pV5Z                                                                                                                                                                                                                                                                                                                                                             | -26.66                  | +1.40           | [-5.52]          | [+1.53]             | [+0.76]              | [-28.49] |
| CBS LIMIT                                                                                                                                                                                                                                                                                                                                                           | [-26.63]                | [+0.90]         | [-5.39]          | [+1.51]             | [+0.76]              | [-28.85] |
| $\Delta E_{\text{final}} = \Delta E_c(\text{FPA}) + \Delta(\text{DBOC}) + \Delta(\text{rel}) + \Delta(\text{core}) + \Delta(\text{aug})$<br>$\Delta E_{\text{final}} = -28.85 - 0.02 + 0.17 + 0.04 + 0.13 = -28.53 \text{ kcal mol}^{-1}$<br>$\Delta E_0 = \Delta E_{\text{final}} + \Delta\text{ZPVE}(\text{harm}) = -28.53 + 5.28 = -23.25 \text{ kcal mol}^{-1}$ |                         |                 |                  |                     |                      |          |
| <b>Electrocyclic Rearrangement</b>                                                                                                                                                                                                                                                                                                                                  |                         |                 |                  |                     |                      |          |
|                                                                                                                                                                                                                                                                                                                                                                     | $\Delta E_c(\text{HF})$ | $+\delta$ [MP2] | $+\delta$ [CCSD] | $+\delta$ [CCSD(T)] | $+\delta$ [CCSDT(Q)] | NET      |
| cc-pVDZ                                                                                                                                                                                                                                                                                                                                                             | +10.78                  | -5.07           | +2.15            | +0.32               | +0.19+0.03           | +8.40    |
| cc-pVTZ                                                                                                                                                                                                                                                                                                                                                             | +11.79                  | -5.40           | +1.96            | +0.27               | [+0.22]              | [+8.84]  |
| cc-pVQZ                                                                                                                                                                                                                                                                                                                                                             | +11.95                  | -5.64           | +1.83            | +0.27               | [+0.22]              | [+8.63]  |
| cc-pV5Z                                                                                                                                                                                                                                                                                                                                                             | +12.01                  | -5.77           | [+1.82]          | [+0.28]             | [+0.22]              | [+8.56]  |
| CBS LIMIT                                                                                                                                                                                                                                                                                                                                                           | [+12.05]                | [-5.91]         | [+1.82]          | [+0.28]             | [+0.22]              | [+8.46]  |
| FUNCTION                                                                                                                                                                                                                                                                                                                                                            | $a+be^{-cX}$            | $a+bX^{-3}$     | $a+bX^{-3}$      | $a+bX^{-3}$         |                      | addition |
| X (fit points)                                                                                                                                                                                                                                                                                                                                                      | (3,4,5)                 | (4,5)           | (3,4)            | (3,4)               |                      |          |
| $\Delta E_{\text{final}} = \Delta E_c(\text{FPA}) + \Delta(\text{DBOC}) + \Delta(\text{rel}) + \Delta(\text{core}) + \Delta(\text{aug})$<br>$\Delta E_{\text{final}} = 8.46 + 0.01 + 0.05 + 0.03 - 0.02 = +8.53 \text{ kcal mol}^{-1}$<br>$\Delta E_0 = \Delta E_{\text{final}} + \Delta\text{ZPVE}(\text{harm}) = 8.53 + 1.07 = 9.60 \text{ kcal mol}^{-1}$        |                         |                 |                  |                     |                      |          |



## Reaction Barriers

### Diels Alder Reaction (Trans-butadiene + Ethylene → TS)

|              | $\Delta E_c(\text{HF})$ | $+\delta$ [MP2] | $+\delta$ [CCSD] | $+\delta$ [CCSD(T)] | $+\delta$ [CCSDT(Q)] | NET      |
|--------------|-------------------------|-----------------|------------------|---------------------|----------------------|----------|
| cc-pVDZ      | +46.92                  | -31.61          | +13.52           | -4.77               | +0.48-0.53           | +24.02   |
| aug'-cc-pVDZ | +46.88                  | -34.99          | +14.30           | -5.29               | [-0.05]              | [+20.86] |
| aug'-cc-pVTZ | +48.59                  | -36.47          | +15.06           | -5.74               | [-0.05]              | [+21.40] |
| aug'-cc-pVQZ | +48.89                  | -36.25          | +15.27           | -5.86               | [-0.05]              | [+22.00] |
| aug'-cc-pV5Z | +48.95                  | -36.16          | [+15.33]         | [-5.91]             | [-0.05]              | [+22.17] |
| CBS LIMIT    | [+48.97]                | [-36.06]        | [+15.39]         | [-5.95]             | [-0.05]              | [+22.30] |

### Diels-Alder Reaction

|           | $\Delta E_c(\text{HF})$ | $+\delta$ [MP2] | $+\delta$ [CCSD] | $+\delta$ [CCSD(T)] | $+\delta$ [CCSDT(Q)] | NET      |
|-----------|-------------------------|-----------------|------------------|---------------------|----------------------|----------|
| cc-pVDZ   | +43.61                  | -31.21          | +13.60           | -4.85               | +0.46-0.53           | +21.07   |
| cc-pVTZ   | +44.97                  | -34.64          | +15.01           | -5.64               | [-0.07]              | [+19.63] |
| cc-pVQZ   | +45.32                  | -35.24          | +15.28           | -5.84               | [-0.07]              | [+19.44] |
| cc-pV5Z   | +45.45                  | -35.44          | [+15.35]         | [-5.92]             | [-0.07]              | [+19.38] |
| CBS LIMIT | [+45.51]                | [-35.65]        | [+15.43]         | [-5.99]             | [-0.07]              | [+19.24] |

$$\Delta E_{\text{final}} = \Delta E_c(\text{FPA}) + \Delta(\text{DBOC}) + \Delta(\text{rel}) + \Delta(\text{core}) + \Delta(\text{aug})$$

$$\Delta E_{\text{final}} = 19.24 + 0.04 + 0.03 + 0.11 + 0.09 = \mathbf{19.51 \text{ kcal mol}^{-1}}$$

$$\Delta E_0 = \Delta E_{\text{final}} + \Delta \text{ZPVE}(\text{harm}) = 19.51 + 2.38 = 21.89 \text{ kcal mol}^{-1}$$

### 1,3-dipolar Cycloaddition

|           | $\Delta E_c(\text{HF})$ | $+\delta$ [MP2] | $+\delta$ [CCSD] | $+\delta$ [CCSD(T)] | $+\delta$ [CCSDT(Q)] | NET      |
|-----------|-------------------------|-----------------|------------------|---------------------|----------------------|----------|
| cc-pVDZ   | +39.31                  | -27.73          | +10.95           | -4.64               | +0.70-0.82           | +17.77   |
| cc-pVTZ   | +42.99                  | -31.67          | +12.86           | -5.53               | [-0.12]              | [+18.53] |
| cc-pVQZ   | +43.42                  | -32.43          | +13.23           | -5.79               | [-0.12]              | [+18.31] |
| cc-pV5Z   | +43.58                  | -32.71          | [+13.37]         | [-5.89]             | [-0.12]              | [+18.24] |
| CBS LIMIT | [+43.65]                | [-32.99]        | [+13.51]         | [-5.98]             | [-0.12]              | [+18.07] |

$$\Delta E_{\text{final}} = \Delta E_c(\text{FPA}) + \Delta(\text{DBOC}) + \Delta(\text{rel}) + \Delta(\text{core}) + \Delta(\text{aug})$$

$$\Delta E_{\text{final}} = 18.07 + 0.02 + 0.01 + 0.23 + 0.07 = \mathbf{+18.40 \text{ kcal mol}^{-1}}$$

$$\Delta E_0 = \Delta E_{\text{final}} + \Delta \text{ZPVE}(\text{harm}) = 18.40 + 1.71 = 20.11 \text{ kcal mol}^{-1}$$

### Electrocyclic Rearrangement

|           | $\Delta E_c(\text{HF})$ | $+\delta$ [MP2] | $+\delta$ [CCSD] | $+\delta$ [CCSD(T)] | $+\delta$ [CCSDT(Q)] | NET      |
|-----------|-------------------------|-----------------|------------------|---------------------|----------------------|----------|
| cc-pVDZ   | +56.42                  | -15.23          | +4.93            | -2.64               | +0.16-0.29           | +43.35   |
| cc-pVTZ   | +56.64                  | -16.05          | +5.72            | -2.98               | [-0.13]              | [+43.20] |
| cc-pVQZ   | +56.71                  | -16.19          | +5.90            | -3.06               | [-0.13]              | [+43.23] |
| cc-pV5Z   | +56.73                  | -16.26          | [+5.98]          | [-3.09]             | [-0.13]              | [+43.22] |
| CBS LIMIT | [+56.73]                | [-16.34]        | [+6.06]          | [-3.12]             | [-0.13]              | [+43.20] |

$$\Delta E_{\text{final}} = \Delta E_c(\text{FPA}) + \Delta(\text{DBOC}) + \Delta(\text{rel}) + \Delta(\text{core}) + \Delta(\text{aug})$$

$$\Delta E_{\text{final}} = 43.20 + 0.04 + 0.01 + 0.20 - 0.00 = \mathbf{+43.45 \text{ kcal mol}^{-1}}$$

$$\Delta E_0 = \Delta E_{\text{final}} + \Delta \text{ZPVE}(\text{harm}) = 43.45 - 0.78 = 42.67 \text{ kcal mol}^{-1}$$

### Sigmatropic Rearrangement [(E)-penta-1,3-diene → TS]

|              | $\Delta E_c(\text{HF})$ | $+\delta$ [MP2] | $+\delta$ [CCSD] | $+\delta$ [CCSD(T)] | $+\delta$ [CCSDT(Q)] | NET      |
|--------------|-------------------------|-----------------|------------------|---------------------|----------------------|----------|
| cc-pVDZ      | +57.47                  | -23.73          | +9.48            | -3.53               | +0.31-0.41           | +39.59   |
| aug'-cc-pVDZ | +57.43                  | -24.07          | +9.77            | -3.67               | [-0.10]              | [+39.35] |
| aug'-cc-pVTZ | +58.70                  | -25.17          | +10.30           | -4.12               | [-0.10]              | [+39.61] |
| aug'-cc-pVQZ | +58.77                  | -25.28          | +10.41           | -4.22               | [-0.10]              | [+39.58] |
| aug'-cc-pV5Z | +58.80                  | -25.31          | [+10.43]         | [-4.25]             | [-0.10]              | [+39.58] |
| CBS LIMIT    | [+58.82]                | [-25.33]        | [+10.45]         | [-4.29]             | [-0.10]              | [+39.55] |

### Sigmatropic Rearrangement

|           | $\Delta E_c(\text{HF})$ | $+\delta$ [MP2] | $+\delta$ [CCSD] | $+\delta$ [CCSD(T)] | $+\delta$ [CCSDT(Q)] | NET      |
|-----------|-------------------------|-----------------|------------------|---------------------|----------------------|----------|
| cc-pVDZ   | +53.88                  | -22.92          | +9.46            | -3.57               | +0.27-0.41           | +36.71   |
| cc-pVTZ   | +54.95                  | -24.05          | +10.20           | -4.09               | [-0.14]              | [+36.88] |
| cc-pVQZ   | +55.01                  | -24.29          | +10.33           | -4.21               | [-0.14]              | [+36.71] |
| cc-pV5Z   | +55.01                  | -24.32          | [+10.33]         | [-4.25]             | [-0.14]              | [+36.63] |
| CBS LIMIT | [+55.00]                | [-24.35]        | [+10.32]         | [-4.29]             | [-0.14]              | [+36.54] |

$$\Delta E_{\text{final}} = \Delta E_c(\text{FPA}) + \Delta(\text{DBOC}) + \Delta(\text{rel}) + \Delta(\text{core}) + \Delta(\text{aug})$$

$$\Delta E_{\text{final}} = 36.54 + 0.08 + 0.00 + 0.08 + 0.03 = +36.73 \text{ kcal mol}^{-1}$$

$$\Delta E_0 = \Delta E_{\text{final}} + \Delta \text{ZPVE}(\text{harm}) = 36.73 - 4.23 = 32.50 \text{ kcal mol}^{-1}$$

### Double Group Transfer

|           | $\Delta E_c(\text{HF})$ | $+\delta$ [MP2] | $+\delta$ [CCSD] | $+\delta$ [CCSD(T)] | $+\delta$ [CCSDT(Q)] | NET      |
|-----------|-------------------------|-----------------|------------------|---------------------|----------------------|----------|
| cc-pVDZ   | +80.06                  | -36.85          | +12.53           | -4.69               | +0.30-0.56           | +50.79   |
| cc-pVTZ   | +82.01                  | -39.46          | +13.82           | -5.73               | [-0.26]              | [+50.38] |
| cc-pVQZ   | +82.29                  | -40.04          | +14.07           | -5.98               | [-0.26]              | [+50.08] |
| cc-pV5Z   | +82.39                  | -40.08          | [+14.00]         | [-6.07]             | [-0.26]              | [+49.98] |
| CBS LIMIT | [+82.44]                | [-40.13]        | [+13.92]         | [-6.16]             | [-0.26]              | [+49.81] |

FUNCTION

$a+be^{-cX}$

$a+bX^{-3}$

$a+bX^{-3}$

$a+bX^{-3}$

addition

$X$  (fit points)

$(3,4,5)$

$(4,5)$

$(3,4)$

$(3,4)$

$$\Delta E_{\text{final}} = \Delta E_c(\text{FPA}) + \Delta(\text{DBOC}) + \Delta(\text{rel}) + \Delta(\text{core}) + \Delta(\text{aug})$$

$$\Delta E_{\text{final}} = 49.81 + 0.07 + 0.02 + 0.00 + 0.23 = +50.13 \text{ kcal mol}^{-1}$$

$$\Delta E_0 = \Delta E_{\text{final}} + \Delta \text{ZPVE}(\text{harm}) = 50.13 - 2.44 = 47.69 \text{ kcal mol}^{-1}$$

**Table S3.** Cartesian coordinates (in Å), energies (in Hartree), and number of imaginary frequencies of all stationary points, computed at CCSD(T)/cc-pVTZ.

**Butadiene (B)**

$E = -155.6913388$

$N_{\text{imag}} = 0$

|   |               |               |               |
|---|---------------|---------------|---------------|
| C | 0.0780090576  | -1.5307847530 | 0.5103413895  |
| C | -0.1224830096 | -0.7267102628 | -0.5457694015 |
| C | 0.1224830096  | 0.7267102628  | -0.5457694015 |
| C | -0.0780090576 | 1.5307847530  | 0.5103413895  |
| H | 0.4751302417  | -1.1448647296 | 1.4422287601  |
| H | -0.1385588653 | -2.5900298062 | 0.4577781798  |
| H | -0.4716717238 | -1.1602557384 | -1.4781716701 |
| H | 0.4716717238  | 1.1602557384  | -1.4781716701 |
| H | -0.4751302417 | 1.1448647296  | 1.4422287601  |
| H | 0.1385588653  | 2.5900298062  | 0.4577781798  |

***trans*-Butadiene**

$E = -155.6959336$

$N_{\text{imag}} = 0$

|   |               |               |              |
|---|---------------|---------------|--------------|
| C | 0.6031763012  | 1.7499202724  | 0.0000000000 |
| C | 0.6072620711  | 0.4060073418  | 0.0000000000 |
| C | -0.6072620711 | -0.4060073418 | 0.0000000000 |
| H | 1.5522570424  | -0.1299924668 | 0.0000000000 |
| H | -1.5522570424 | 0.1299924668  | 0.0000000000 |
| C | -0.6031763012 | -1.7499202724 | 0.0000000000 |
| H | 0.3280364927  | -2.3056054391 | 0.0000000000 |
| H | 1.5236702684  | 2.3188843928  | 0.0000000000 |
| H | -0.3280364927 | 2.3056054391  | 0.0000000000 |
| H | -1.5236702684 | -2.3188843928 | 0.0000000000 |

**Ethylene (E)**

$E = -78.43880351$

$N_{\text{imag}} = 0$

|   |               |               |              |
|---|---------------|---------------|--------------|
| C | 0.6685655813  | 0.0000000000  | 0.0000000000 |
| C | -0.6685655813 | 0.0000000000  | 0.0000000000 |
| H | 1.2337633984  | 0.9240321875  | 0.0000000000 |
| H | 1.2337633984  | -0.9240321875 | 0.0000000000 |
| H | -1.2337633984 | 0.9240321875  | 0.0000000000 |
| H | -1.2337633984 | -0.9240321875 | 0.0000000000 |

**TS: DA**

$E = -234.0987534$

$N_{\text{imag}} = 1,618.9i \text{ cm}^{-1}$

|   |               |               |               |
|---|---------------|---------------|---------------|
| C | -0.4154889803 | -1.4230046298 | 0.4914165794  |
| C | -1.2714421328 | -0.7068920916 | -0.3302462784 |
| C | -1.2748595730 | 0.7006702447  | -0.3303631561 |
| C | -0.4223986696 | 1.4210749167  | 0.4911783485  |
| H | -0.1284754598 | -1.0289393722 | 1.4569991839  |
| H | -0.3497935865 | -2.5007558373 | 0.3945333287  |
| H | -1.7811020584 | -1.2250035542 | -1.1356241613 |
| H | -1.7870336076 | 1.2161650530  | -1.1358251637 |
| H | -0.1334714665 | 1.0285808294  | 1.4568319204  |
| H | -0.3619410862 | 2.4991169969  | 0.3941076830  |
| C | 1.5821961637  | 0.6990828245  | -0.1805625523 |
| C | 1.5855716595  | -0.6914587859 | -0.1804052311 |
| H | 2.0580658056  | 1.2364955663  | 0.6305385466  |
| H | 1.4952914442  | 1.2373987055  | -1.1142543585 |
| H | 2.0640419870  | -1.2263684332 | 0.6308226672  |
| H | 1.5013121389  | -1.2304088475 | -1.1139741963 |

**P: DA**

$E = -234.2058720$

$N_{\text{imag}} = 0$

|   |               |               |               |
|---|---------------|---------------|---------------|
| C | 0.1078301460  | -1.4969587160 | -0.0176383714 |
| C | 0.0577077454  | -0.6680994266 | -1.2779887795 |
| C | -0.0577077454 | 0.6680994266  | -1.2779887795 |
| C | -0.1078301460 | 1.4969587160  | -0.0176383714 |
| H | -0.5253984796 | -2.3813778370 | -0.1373130930 |
| H | 1.1280674294  | -1.8722030397 | 0.1318306047  |
| H | 0.1150434038  | -1.1945828603 | -2.2256951591 |
| H | -0.1150434038 | 1.1945828603  | -2.2256951591 |
| H | -1.1280674294 | 1.8722030397  | 0.1318306047  |
| H | 0.5253984796  | 2.3813778370  | -0.1373130930 |
| C | 0.3348534264  | 0.6882093345  | 1.2059578351  |
| C | -0.3348534264 | -0.6882093345 | 1.2059578351  |
| H | 0.1023546512  | 1.2337810408  | 2.1239820104  |
| H | 1.4221818043  | 0.5547640764  | 1.1748728185  |
| H | -1.4221818043 | -0.5547640764 | 1.1748728185  |
| H | -0.1023546512 | -1.2337810408 | 2.1239820104  |

**Methylazide (MA)**

$E = -203.7684651$

$N_{\text{imag}} = 0$

|   |               |               |               |
|---|---------------|---------------|---------------|
| N | 1.6940531799  | 0.2636398203  | 0.0000000000  |
| N | 0.6110655338  | -0.0955013960 | 0.0000000000  |
| N | -0.5129188495 | -0.6156378581 | 0.0000000000  |
| C | -1.6124164288 | 0.3705251895  | 0.0000000000  |
| H | -2.5384425885 | -0.1973521305 | 0.0000000000  |
| H | -1.5821219680 | 1.0016430114  | -0.8915076049 |
| H | -1.5821219680 | 1.0016430114  | 0.8915076049  |

**TS: 1,3-DC**

$E = -282.1775562$

$N_{\text{imag}} = 1,515.2i \text{ cm}^{-1}$

|   |               |               |               |
|---|---------------|---------------|---------------|
| N | -0.8615904666 | -1.3715610485 | -0.1281117290 |
| N | 0.2397098768  | -1.0208060276 | 0.0748565326  |
| N | 0.8474946919  | 0.0509335256  | 0.4042230481  |
| C | 2.1253621159  | 0.2972713149  | -0.2720273779 |
| H | 2.4517576921  | 1.2879182477  | 0.0394885503  |
| H | 2.0267280064  | 0.2776100526  | -1.3615543912 |
| H | 2.8786574489  | -0.4282240514 | 0.0381319994  |
| C | -1.8071946641 | 0.5608189941  | -0.1328772802 |
| C | -0.7371188633 | 1.4038621723  | 0.1107110035  |
| H | -2.4840386425 | 0.2952290384  | 0.6686360877  |
| H | -2.1710533230 | 0.4122823877  | -1.1401730524 |
| H | -0.5871778424 | 1.8288863896  | 1.0935952748  |
| H | -0.2612520155 | 1.9263151283  | -0.7116812868 |

**P: 1,3-DC**

$E = -282.2519795$

$N_{\text{imag}} = 0$

|   |               |               |               |
|---|---------------|---------------|---------------|
| N | -1.2636521870 | -0.8558708395 | -0.1377172120 |
| N | -0.0484387373 | -1.0946189317 | 0.0273335357  |
| N | 0.6880173747  | 0.0542478231  | 0.3376083808  |
| C | 2.0637178004  | -0.0258287505 | -0.1258983926 |
| H | 2.6484737478  | 0.7606851972  | 0.3515026260  |
| H | 2.1369685960  | 0.0879012306  | -1.2157850323 |
| H | 2.4700918157  | -0.9938962776 | 0.1607419616  |
| C | -1.5038377896 | 0.6075159015  | 0.0380327666  |
| C | -0.1089392980 | 1.2035535734  | -0.0974019212 |
| H | -1.9138750406 | 0.7494265416  | 1.0420049047  |
| H | -2.2281739337 | 0.9532950601  | -0.6953881326 |
| H | 0.0631082301  | 2.0649981210  | 0.5448227888  |
| H | 0.1252292629  | 1.4680844828  | -1.1390898046 |

**TS: ER**

$E = -155.6222873$

$N_{\text{imag}} = 1,760.0i \text{ cm}^{-1}$

|   |               |               |               |
|---|---------------|---------------|---------------|
| C | -1.0666140363 | -0.6535552579 | 0.1073104694  |
| C | -0.6824585285 | 0.7129890786  | -0.0936233528 |
| C | 0.6823097975  | 0.7131287592  | 0.0936368753  |
| C | 1.0667503382  | -0.6533320659 | -0.1073230776 |
| H | -0.8668911855 | -1.1003572755 | 1.0708836185  |
| H | -1.8685554516 | -1.1308943621 | -0.4569205267 |
| H | -1.3362035640 | 1.5210005662  | -0.4020313330 |
| H | 1.3358817170  | 1.5212692170  | 0.4020681124  |
| H | 0.8671248293  | -1.1001553744 | -1.0709060115 |
| H | 1.8687916458  | -1.1305200750 | 0.4568952543  |

**P: ER**

**E** = -155.6776100

**N<sub>imag</sub>** = 0

|   |               |               |               |
|---|---------------|---------------|---------------|
| C | 0.7858329668  | 0.0000000000  | -0.7271128451 |
| C | 0.6734918648  | 0.0000000000  | 0.7908206581  |
| C | -0.6734918648 | 0.0000000000  | 0.7908206581  |
| C | -0.7858329668 | 0.0000000000  | -0.7271128451 |
| H | 1.2406036241  | 0.8896182834  | -1.1674992689 |
| H | 1.2406036241  | -0.8896182834 | -1.1674992689 |
| H | 1.4187784135  | 0.0000000000  | 1.5764405464  |
| H | -1.4187784135 | 0.0000000000  | 1.5764405464  |
| H | -1.2406036241 | -0.8896182834 | -1.1674992689 |
| H | -1.2406036241 | 0.8896182834  | -1.1674992689 |

**(Z)-penta-1,3-diene (P)**

**E** = -194.9332918

**N<sub>imag</sub>** = 0

|   |               |                |               |
|---|---------------|----------------|---------------|
| C | -1.6360350254 | 0.8505601039   | 0.1845632501  |
| C | -1.2775280324 | -0.3716530045  | -0.2424735716 |
| C | -0.0155657702 | -1.0614943258  | 0.0748834466  |
| C | 1.2159134053  | -0.5196405440  | 0.1345053410  |
| C | 1.5909583114  | 0.9089741743   | -0.1431850908 |
| H | -2.5913775415 | 1.2786748623   | -0.0924530998 |
| H | -0.9981074929 | 1.4342652575   | 0.8368313382  |
| H | -1.9836154152 | -0.93281111692 | -0.8488735534 |
| H | -0.0988818219 | -2.1308480370  | 0.2463388562  |
| H | 2.0346055020  | -1.1864651801  | 0.3889073658  |
| H | 2.5214994984  | 0.9508209466   | -0.7137551391 |
| H | 1.7604619367  | 1.4609915280   | 0.7866879860  |
| H | 0.8111098128  | 1.4264092528   | -0.7024315521 |

**(E)-penta-1,3-diene**

**E** = -194.9378227

**N<sub>imag</sub>** = 0

|   |               |               |               |
|---|---------------|---------------|---------------|
| C | -1.9664379752 | -0.9229607524 | 0.0000000000  |
| C | -1.3361140609 | 0.4407726013  | 0.0000000000  |
| C | -0.0188623542 | 0.7255767591  | 0.0000000000  |
| C | 1.0776013191  | -0.2399270821 | 0.0000000000  |
| C | 2.3725351048  | 0.1235673038  | 0.0000000000  |
| H | -2.0272932162 | 1.2785494285  | 0.0000000000  |
| H | 0.2775705580  | 1.7708387100  | 0.0000000000  |
| H | 0.8304224963  | -1.2957286992 | 0.0000000000  |
| H | 3.1666073000  | -0.6117948613 | 0.0000000000  |
| H | 2.6599882618  | 1.1693687558  | 0.0000000000  |
| H | -1.2300469803 | -1.7254842137 | 0.0000000000  |
| H | -2.6049598100 | -1.0491298167 | 0.8788128700  |
| H | -2.6049598100 | -1.0491298167 | -0.8788128700 |

**TS: SR**

$E = -194.8743033$

$N_{\text{imag}} = 1,1690.1i \text{ cm}^{-1}$

|   |               |               |               |
|---|---------------|---------------|---------------|
| C | -1.2993759223 | -0.9430169372 | 0.0054131718  |
| C | -1.2102761001 | 0.4742672423  | 0.0315877962  |
| C | 0.0004274533  | 1.1578132068  | -0.1175233788 |
| C | 1.2106183055  | 0.4733922158  | 0.0317305502  |
| C | 1.2986886484  | -0.9439538441 | 0.0055515290  |
| H | -2.1671140916 | -1.3799842724 | 0.4951685910  |
| H | -1.0338532234 | -1.4667982882 | -0.9069115660 |
| H | -2.0425012193 | 1.0437191605  | 0.4343446847  |
| H | 0.0008166627  | 2.2373077878  | -0.0245940109 |
| H | 2.0432108719  | 1.0422409678  | 0.4345809623  |
| H | 2.1660571733  | -1.3815630575 | 0.4953882069  |
| H | 1.0328772200  | -1.4675174332 | -0.9068131896 |
| H | -0.0004743347 | -1.2290693603 | 0.4936915441  |

**Ethane (Et)**

$E = -79.6744450$

$N_{\text{imag}} = 0$

|   |               |               |               |
|---|---------------|---------------|---------------|
| C | 0.0000005113  | 0.7644753913  | 0.0000000000  |
| C | -0.0000005113 | -0.7644753913 | 0.0000000000  |
| H | -0.5089680268 | 1.1592823746  | -0.8815621296 |
| H | -0.5089680268 | 1.1592823746  | 0.8815621296  |
| H | 1.0179396811  | 1.1592868837  | 0.0000000000  |
| H | 0.5089680268  | -1.1592823746 | 0.8815621296  |
| H | -1.0179396811 | -1.1592868837 | 0.0000000000  |
| H | 0.5089680268  | -1.1592823746 | -0.8815621296 |

**TS: DGT**

$E = -158.0325438$

$N_{\text{imag}} = 1,1780.0i \text{ cm}^{-1}$

|   |               |               |               |
|---|---------------|---------------|---------------|
| C | 1.3366737481  | 0.7118771527  | 0.0000160548  |
| C | 1.3366612865  | -0.7118996217 | 0.0000128249  |
| C | -1.3366726002 | -0.7118773510 | -0.0000233917 |
| C | -1.3366615093 | 0.7119000585  | -0.0000053194 |
| H | 1.6264256070  | 1.2279009228  | 0.9102460712  |
| H | 1.6264354758  | 1.2279028481  | -0.9102098664 |
| H | 0.0000099553  | 0.9800236631  | 0.0000093965  |
| H | 1.6263978569  | -1.2279323045 | 0.9102424798  |
| H | 1.6264209108  | -1.2279286393 | -0.9102112416 |
| H | -0.0000085634 | -0.9800236253 | -0.0000078012 |
| H | -1.6264440753 | -1.2279155100 | 0.9101921521  |
| H | -1.6264188561 | -1.2278912370 | -0.9102605349 |
| H | -1.6264237928 | 1.2279182694  | 0.9102246001  |
| H | -1.6264055352 | 1.2279427732  | -0.9102272627 |

**Table S4.** Cartesian coordinates (in Å), energies (in kcal mol<sup>-1</sup>), and number of imaginary frequencies of all stationary points, computed at BP86/DZ.

**Butadiene (B)**

**E** = -1254.62

**H** = -1198.89

**G** = -1218.75

**N<sub>imag</sub>** = 0

|   |           |           |           |
|---|-----------|-----------|-----------|
| C | 1.369582  | -0.736873 | -0.497167 |
| C | 0.711233  | -0.193600 | 0.545296  |
| C | -0.711232 | 0.193602  | 0.545297  |
| C | -1.369582 | 0.736877  | -0.497166 |
| H | 0.860239  | -0.975991 | -1.434093 |
| H | 2.430863  | -0.983754 | -0.429620 |
| H | 1.247159  | -0.036264 | 1.488737  |
| H | -1.247159 | 0.036262  | 1.488736  |
| H | -0.860240 | 0.975991  | -1.434093 |
| H | -2.430864 | 0.983750  | -0.429621 |

**Ethylene (E)**

**E** = -709.07

**H** = -675.19

**G** = -690.80

**N<sub>imag</sub>** = 0

|   |           |           |           |
|---|-----------|-----------|-----------|
| C | 0.669518  | 0.000000  | 0.000000  |
| C | -0.669518 | 0.000000  | -0.000000 |
| H | 1.243549  | -0.929860 | 0.000000  |
| H | 1.243549  | 0.929860  | 0.000000  |
| H | -1.243549 | -0.929860 | -0.000000 |
| H | -1.243549 | 0.929860  | -0.000000 |

**TS: DA**

**E** = -1950.85

**H** = -1860.33

**G** = -1883.67

**N<sub>imag</sub>** = 1, -443.475i cm<sup>-1</sup>

|   |           |           |           |
|---|-----------|-----------|-----------|
| C | 1.800396  | -0.553240 | -1.014642 |
| C | 1.571473  | -1.659419 | -0.204153 |
| C | 0.267348  | -2.116291 | 0.098834  |
| C | -0.871506 | -1.489130 | -0.393770 |
| H | 1.100371  | 0.282598  | -1.029645 |
| H | 2.819200  | -0.309073 | -1.325519 |
| H | 2.413315  | -2.311205 | 0.048857  |
| H | 0.166332  | -3.098391 | 0.570845  |
| H | -0.885120 | -0.412858 | -0.568058 |
| H | -1.852537 | -1.945294 | -0.239836 |
| C | -0.526956 | -1.644813 | -2.656227 |
| C | 0.757435  | -1.194614 | -2.954996 |
| H | -1.389337 | -1.001903 | -2.846246 |
| H | -0.735223 | -2.714621 | -2.623703 |
| H | 0.902502  | -0.198529 | -3.379155 |



H 1.553173 -1.912479 -3.155973

**P: DA**

**E** = -2006.01

**H** = -1912.18

**G** = -1934.26

**N<sub>imag</sub>** = 0

|   |           |           |           |
|---|-----------|-----------|-----------|
| C | 1.921287  | -1.072436 | -1.535850 |
| C | 1.464946  | -1.465155 | -0.142835 |
| C | 0.190227  | -1.773008 | 0.161937  |
| C | -0.931612 | -1.800692 | -0.859719 |
| H | 2.607606  | -0.209179 | -1.469878 |
| H | 2.509313  | -1.901487 | -1.977151 |
| H | 2.229143  | -1.492101 | 0.641441  |
| H | -0.072878 | -2.020914 | 1.195926  |
| H | -1.597476 | -0.929933 | -0.697649 |
| H | -1.554750 | -2.698841 | -0.699535 |
| C | -0.389164 | -1.786239 | -2.308138 |
| C | 0.726066  | -0.727346 | -2.454896 |
| H | -1.208793 | -1.594036 | -3.020306 |
| H | 0.029180  | -2.782032 | -2.544043 |
| H | 0.323155  | 0.259983  | -2.163167 |
| H | 1.060239  | -0.652310 | -3.503055 |

**Methylazide (MA)**

**E** = -897.62

**H** = -863.98

**G** = -884.19

**N<sub>imag</sub>** = 0

|   |           |           |           |
|---|-----------|-----------|-----------|
| N | 1.065184  | 0.200151  | -0.292862 |
| N | -0.063755 | -0.034550 | -0.074257 |
| N | -1.303718 | -0.060728 | 0.138230  |
| C | -1.949762 | -1.392661 | 0.404572  |
| H | -3.010601 | -1.177603 | 0.554354  |
| H | -1.533545 | -1.855565 | 1.312115  |
| H | -1.826041 | -2.067535 | -0.455873 |

**TS: 1,3-DC**

**E** = -1600.58

**H** = -1532.33

**G** = -1557.08

**N<sub>imag</sub>** = 1, -275.361i cm<sup>-1</sup>

|   |           |           |           |
|---|-----------|-----------|-----------|
| N | -1.453714 | -2.606634 | -0.087487 |
| N | -2.599452 | -2.229607 | -0.050277 |
| N | -3.239397 | -1.114542 | -0.135235 |
| C | -4.663568 | -1.005488 | 0.260525  |
| H | -4.939996 | 0.040863  | 0.088083  |
| H | -4.815089 | -1.254479 | 1.322787  |
| H | -5.296848 | -1.648281 | -0.369303 |
| C | -0.467837 | -0.607966 | -0.201916 |
| C | -1.537989 | 0.272357  | -0.192562 |

|   |           |           |           |
|---|-----------|-----------|-----------|
| H | 0.011944  | -0.886638 | -1.140815 |
| H | 0.089702  | -0.817314 | 0.711185  |
| H | -1.909113 | 0.705630  | -1.121281 |
| H | -1.835819 | 0.774023  | 0.729666  |

**P: 1,3-DC**

**E** = -1629.23

**H** = -1558.83

**G** = -1581.93

**N<sub>imag</sub>** = 0

|   |           |           |           |
|---|-----------|-----------|-----------|
| N | -1.598594 | -2.668826 | -0.156446 |
| N | -2.887784 | -2.589786 | -0.121688 |
| N | -3.346475 | -1.254366 | -0.192625 |
| C | -4.726462 | -0.963061 | 0.175195  |
| H | -5.138537 | -0.190640 | -0.490043 |
| H | -4.809841 | -0.623480 | 1.224636  |
| H | -5.302847 | -1.888217 | 0.049423  |
| C | -1.009028 | -1.231969 | -0.270245 |
| C | -2.218772 | -0.291001 | -0.044470 |
| H | -0.591224 | -1.151836 | -1.284259 |
| H | -0.208276 | -1.136960 | 0.470685  |
| H | -2.291774 | 0.501115  | -0.800595 |
| H | -2.226419 | 0.155042  | 0.967428  |

**TS: ER**

**E** = -1212.92

**H** = -1158.56

**G** = -1177.25

**N<sub>imag</sub>** = 1, -673.245i cm<sup>-1</sup>

|   |           |           |           |
|---|-----------|-----------|-----------|
| C | -1.045530 | 0.743702  | 0.036923  |
| C | -0.628557 | -0.574515 | 0.460714  |
| C | 0.727013  | -0.609946 | 0.193360  |
| C | 1.113580  | 0.780594  | 0.103548  |
| H | -0.944719 | 0.995709  | -1.019649 |
| H | -1.810546 | 1.320043  | 0.576081  |
| H | -1.257097 | -1.324619 | 0.946848  |
| H | 1.373630  | -1.472115 | 0.012785  |
| H | 1.002966  | 1.399558  | 0.994989  |
| H | 1.868132  | 1.136058  | -0.612259 |

**P: ER**

**E** = -1240.65

**H** = -1184.77

**G** = -1203.52

**N<sub>imag</sub>** = 0

|   |           |           |           |
|---|-----------|-----------|-----------|
| C | -0.757433 | 0.808095  | -0.022342 |
| C | -0.632691 | -0.692791 | 0.293790  |
| C | 0.716104  | -0.665043 | 0.417358  |
| C | 0.834890  | 0.840847  | 0.123679  |
| H | -1.127418 | 1.050799  | -1.030320 |
| H | -1.296021 | 1.407202  | 0.727865  |

|   |           |           |           |
|---|-----------|-----------|-----------|
| H | -1.374458 | -1.486907 | 0.383705  |
| H | 1.460933  | -1.428581 | 0.643498  |
| H | 1.203143  | 1.458516  | 0.957175  |
| H | 1.371822  | 1.102334  | -0.801069 |

**(Z)-penta-1,3-diene (P)**

**E** = -1622.19

**H** = -1548.11

**G** = -1570.61

**N<sub>imag</sub>** = 0

|   |           |           |           |
|---|-----------|-----------|-----------|
| C | -1.841787 | 0.303104  | -0.303273 |
| C | -0.897610 | 1.146778  | 0.160893  |
| C | 0.551998  | 1.054935  | -0.078805 |
| C | 1.319966  | -0.060104 | -0.079178 |
| C | 0.877391  | -1.470298 | 0.215269  |
| H | -2.898323 | 0.461338  | -0.076699 |
| H | -1.594729 | -0.536209 | -0.956361 |
| H | -1.218662 | 2.016226  | 0.748238  |
| H | 1.055546  | 2.015759  | -0.238093 |
| H | 2.389362  | 0.068990  | -0.281817 |
| H | 1.634741  | -1.984662 | 0.830094  |
| H | 0.763147  | -2.059684 | -0.711944 |
| H | -0.082319 | -1.493643 | 0.753273  |

**TS: SR**

**E** = -1591.44

**H** = -1520.33

**G** = -1541.03

**N<sub>imag</sub>** = 1, -1409.899i cm<sup>-1</sup>

|   |           |           |           |
|---|-----------|-----------|-----------|
| C | -1.531970 | -0.014108 | -0.091902 |
| C | -0.712590 | 1.151592  | -0.157446 |
| C | 0.689599  | 1.091413  | -0.247228 |
| C | 1.371146  | -0.096734 | 0.071565  |
| C | 0.717745  | -1.361863 | 0.155255  |
| H | -2.520852 | 0.113194  | 0.366137  |
| H | -1.567915 | -0.676494 | -0.964400 |
| H | -1.146292 | 2.120317  | 0.114193  |
| H | 1.252403  | 2.027540  | -0.265517 |
| H | 2.373173  | 0.011841  | 0.501058  |
| H | 1.209231  | -2.121534 | 0.775924  |
| H | 0.295244  | -1.792555 | -0.759782 |
| H | -0.596006 | -0.913636 | 0.520914  |

**Ethane (Et)**

**E** = -901.35

**H** = -852.60

**G** = -868.81

**N<sub>imag</sub>** = 0

|   |           |           |           |
|---|-----------|-----------|-----------|
| C | 0.628873  | -0.360155 | 0.261911  |
| C | -0.628873 | 0.360155  | -0.261911 |
| H | 1.288587  | 0.337515  | 0.802102  |

|   |           |           |           |
|---|-----------|-----------|-----------|
| H | 0.359691  | -1.174153 | 0.953784  |
| H | 1.207700  | -0.798958 | -0.566431 |
| H | -1.288554 | -0.337500 | -0.802162 |
| H | -1.207737 | 0.798899  | 0.566436  |
| H | -0.359688 | 1.174199  | -0.953730 |

**TS: DGT**

**E** = -1570.98

**H** = -1491.95

**G** = -1512.22

**N<sub>imag</sub>** = 1, -1437.768i cm<sup>-1</sup>

|   |           |           |           |
|---|-----------|-----------|-----------|
| C | 1.348528  | 0.715753  | 0.000000  |
| C | 1.348527  | -0.715753 | -0.000000 |
| C | -1.348527 | -0.715754 | 0.000000  |
| C | -1.348526 | 0.715754  | -0.000000 |
| H | 1.653199  | 1.233048  | 0.916967  |
| H | 1.653199  | 1.233048  | -0.916967 |
| H | -0.000001 | 1.011447  | -0.000000 |
| H | 1.653199  | -1.233048 | 0.916967  |
| H | 1.653199  | -1.233048 | -0.916967 |
| H | 0.000000  | -1.011447 | -0.000000 |
| H | -1.653199 | -1.233048 | 0.916967  |
| H | -1.653199 | -1.233048 | -0.916967 |
| H | -1.653199 | 1.233048  | 0.916967  |
| H | -1.653199 | 1.233048  | -0.916967 |

**Table S5.** Cartesian coordinates (in Å), energies (in kcal mol<sup>-1</sup>), and number of imaginary frequencies of all stationary points, computed at BP86/DZP.

**Butadiene (B)**

**E** = -1283.74

**H** = -1228.37

**G** = -1248.28

**N<sub>imag</sub>** = 0

|   |           |           |           |
|---|-----------|-----------|-----------|
| C | 1.364051  | -0.728859 | -0.496452 |
| C | 0.706097  | -0.196163 | 0.543842  |
| C | -0.706097 | 0.196163  | 0.543841  |
| C | -1.364051 | 0.728858  | -0.496453 |
| H | 0.858973  | -0.947056 | -1.438429 |
| H | 2.421730  | -0.980159 | -0.426094 |
| H | 1.240131  | -0.059379 | 1.490287  |
| H | -1.240131 | 0.059379  | 1.490286  |
| H | -0.858973 | 0.947057  | -1.438429 |
| H | -2.421730 | 0.980160  | -0.426094 |

**Ethylene (E)**

**E** = -723.77

**H** = -690.13

**G** = -705.75

**N<sub>imag</sub>** = 0

|   |           |           |           |
|---|-----------|-----------|-----------|
| C | 0.666331  | 0.000000  | -0.000000 |
| C | -0.666331 | 0.000000  | 0.000000  |
| H | 1.238286  | -0.928845 | -0.000000 |
| H | 1.238286  | 0.928845  | -0.000000 |
| H | -1.238286 | -0.928845 | 0.000000  |
| H | -1.238286 | 0.928845  | 0.000000  |

**TS: DA**

**E** = -1994.16

**H** = -1904.30

**G** = -1927.78

**N<sub>imag</sub>** = 1, -445.460i cm<sup>-1</sup>

|   |           |           |           |
|---|-----------|-----------|-----------|
| C | 1.790955  | -0.560187 | -1.016420 |
| C | 1.566752  | -1.655501 | -0.200966 |
| C | 0.269671  | -2.110001 | 0.100377  |
| C | -0.861451 | -1.489429 | -0.400091 |
| H | 1.086906  | 0.269789  | -1.037488 |
| H | 2.807016  | -0.310776 | -1.325546 |
| H | 2.407483  | -2.310493 | 0.042699  |
| H | 0.167782  | -3.095292 | 0.562994  |
| H | -0.871327 | -0.416211 | -0.582109 |
| H | -1.842929 | -1.939724 | -0.244956 |
| C | -0.521975 | -1.644059 | -2.649146 |
| C | 0.756387  | -1.196252 | -2.946501 |
| H | -1.380692 | -0.998459 | -2.834664 |
| H | -0.733549 | -2.711499 | -2.622828 |
| H | 0.899473  | -0.199727 | -3.364917 |

H 1.550365 -1.911442 -3.153824

**P: DA**

**E** = -2049.89

**H** = -1956.73

**G** = -1978.87

**N<sub>imag</sub>** = 0

|   |           |           |           |
|---|-----------|-----------|-----------|
| C | 1.910760  | -1.072173 | -1.532797 |
| C | 1.459776  | -1.464694 | -0.150125 |
| C | 0.190988  | -1.771103 | 0.153247  |
| C | -0.921054 | -1.800929 | -0.862542 |
| H | 2.596527  | -0.210921 | -1.465703 |
| H | 2.509979  | -1.893977 | -1.968324 |
| H | 2.220077  | -1.492092 | 0.635984  |
| H | -0.067780 | -2.018870 | 1.186890  |
| H | -1.594119 | -0.939493 | -0.692154 |
| H | -1.543088 | -2.697364 | -0.701167 |
| C | -0.386920 | -1.779007 | -2.301502 |
| C | 0.726902  | -0.736283 | -2.450356 |
| H | -1.206087 | -1.581513 | -3.009842 |
| H | 0.019185  | -2.775570 | -2.548329 |
| H | 0.329131  | 0.255760  | -2.173589 |
| H | 1.062210  | -0.667494 | -3.496606 |

**Methylazide (MA)**

**E** = -962.84

**H** = -928.72

**G** = -948.81

**N<sub>imag</sub>** = 0

|    |           |           |           |
|----|-----------|-----------|-----------|
| N  | 1.013568  | 0.118621  | -0.271370 |
| N  | -0.106814 | -0.033107 | -0.067297 |
| N  | -1.321971 | -0.045650 | 0.135905  |
| C  | -1.924995 | -1.365532 | 0.396773  |
| H  | -2.992402 | -1.195136 | 0.555621  |
| H  | -1.496980 | -1.827621 | 1.297778  |
| H. | -1.792643 | -2.040066 | -0.461130 |

**TS: 1,3-DC**

**E** = -1674.21

**H** = -1605.95

**G** = -1630.09

**N<sub>imag</sub>** = 1, -353.398i cm<sup>-1</sup>

|   |           |           |           |
|---|-----------|-----------|-----------|
| N | -1.489250 | -2.576890 | -0.144944 |
| N | -2.616130 | -2.223637 | -0.191263 |
| N | -3.256515 | -1.143778 | -0.363906 |
| C | -4.564179 | -0.985119 | 0.267331  |
| H | -4.905363 | 0.026976  | 0.027347  |
| H | -4.518222 | -1.100543 | 1.361099  |
| H | -5.292113 | -1.697296 | -0.144953 |
| C | -0.534872 | -0.633770 | -0.137734 |
| C | -1.609303 | 0.234548  | -0.200042 |

|   |           |           |           |
|---|-----------|-----------|-----------|
| H | 0.038157  | -0.862150 | -1.035750 |
| H | -0.045809 | -0.842471 | 0.812224  |
| H | -1.883618 | 0.708646  | -1.141010 |
| H | -1.979959 | 0.717409  | 0.704970  |

**P: 1,3-DC**

**E** = -1707.51

**H** = -1636.98

**G** = -1659.50

**N<sub>imag</sub>** = 0

|   |           |           |           |
|---|-----------|-----------|-----------|
| N | -1.622551 | -2.609217 | -0.020953 |
| N | -2.875531 | -2.543293 | -0.073359 |
| N | -3.339034 | -1.258321 | -0.334232 |
| C | -4.676791 | -0.971921 | 0.151185  |
| H | -5.099364 | -0.129021 | -0.408937 |
| H | -4.681331 | -0.726049 | 1.228727  |
| H | -5.299329 | -1.857157 | -0.016350 |
| C | -1.048326 | -1.241215 | -0.255369 |
| C | -2.245397 | -0.309705 | -0.069523 |
| H | -0.668799 | -1.229084 | -1.290426 |
| H | -0.211138 | -1.068521 | 0.429621  |
| H | -2.269742 | 0.526940  | -0.777791 |
| H | -2.318699 | 0.082579  | 0.964402  |

**TS: ER**

**E** = -1243.88

**H** = -1189.87

**G** = -1208.60

**N<sub>imag</sub>** = 1, -676.079i cm<sup>-1</sup>

|   |           |           |           |
|---|-----------|-----------|-----------|
| C | -1.036802 | 0.735178  | 0.038978  |
| C | -0.625309 | -0.569072 | 0.459650  |
| C | 0.723632  | -0.604579 | 0.192329  |
| C | 1.105038  | 0.771713  | 0.104771  |
| H | -0.919851 | 0.994944  | -1.011298 |
| H | -1.809657 | 1.313320  | 0.563571  |
| H | -1.252238 | -1.311688 | 0.959808  |
| H | 1.368572  | -1.464945 | -0.003928 |
| H | 0.978147  | 1.395204  | 0.987606  |
| H | 1.867340  | 1.134393  | -0.598147 |

**P: ER**

**E** = -1273.70

**H** = -1218.15

**G** = -1236.91

**N<sub>imag</sub>** = 0

|   |           |           |           |
|---|-----------|-----------|-----------|
| C | -0.744870 | 0.798200  | -0.019133 |
| C | -0.627665 | -0.682931 | 0.292274  |
| C | 0.711045  | -0.655389 | 0.414906  |
| C | 0.822360  | 0.830436  | 0.124588  |
| H | -1.119804 | 1.046108  | -1.023723 |
| H | -1.287517 | 1.400610  | 0.725095  |

|   |           |           |           |
|---|-----------|-----------|-----------|
| H | -1.372865 | -1.474862 | 0.381421  |
| H | 1.459291  | -1.416601 | 0.640922  |
| H | 1.195566  | 1.451586  | 0.952932  |
| H | 1.363330  | 1.097314  | -0.795944 |

**(Z)-penta-1,3-diene (P)**

**E** = -1658.97

**H** = -1585.40

**G** = -1608.03

**N<sub>imag</sub>** = 0

|   |           |           |           |
|---|-----------|-----------|-----------|
| C | -1.840642 | 0.297529  | -0.279756 |
| C | -0.894584 | 1.151533  | 0.143955  |
| C | 0.548319  | 1.048548  | -0.074592 |
| C | 1.313818  | -0.061541 | -0.068670 |
| C | 0.877766  | -1.467522 | 0.198233  |
| H | -2.893571 | 0.478124  | -0.064044 |
| H | -1.600303 | -0.579534 | -0.879899 |
| H | -1.218836 | 2.050704  | 0.680519  |
| H | 1.062526  | 2.005043  | -0.213889 |
| H | 2.384382  | 0.079132  | -0.248572 |
| H | 1.621499  | -1.986542 | 0.820577  |
| H | 0.793937  | -2.044835 | -0.737024 |
| H | -0.095591 | -1.508106 | 0.704759  |

**TS: SR**

**E** = -1630.18

**H** = -1559.65

**G** = -1580.41

**N<sub>imag</sub>** = 1, -1380.954i cm<sup>-1</sup>

|   |           |           |           |
|---|-----------|-----------|-----------|
| C | -1.523616 | -0.014327 | -0.092343 |
| C | -0.707986 | 1.142243  | -0.163775 |
| C | 0.686285  | 1.085011  | -0.253224 |
| C | 1.361905  | -0.097745 | 0.062834  |
| C | 0.713919  | -1.354742 | 0.152587  |
| H | -2.513345 | 0.115176  | 0.359463  |
| H | -1.554267 | -0.690602 | -0.950129 |
| H | -1.135138 | 2.108858  | 0.121331  |
| H | 1.246936  | 2.021621  | -0.249402 |
| H | 2.357215  | 0.016712  | 0.503680  |
| H | 1.209173  | -2.114877 | 0.766904  |
| H | 0.273931  | -1.785772 | -0.750028 |
| H | -0.582099 | -0.892582 | 0.510872  |

**Ethane (Et)**

**E** = -916.98

**H** = -868.64

**G** = -884.89

**N<sub>imag</sub>** = 0

|   |           |           |           |
|---|-----------|-----------|-----------|
| C | -0.000000 | 0.000002  | 0.764569  |
| C | 0.000000  | -0.000001 | -0.764569 |
| H | 0.000032  | 1.023684  | 1.164870  |



|   |           |           |           |
|---|-----------|-----------|-----------|
| H | -0.886539 | -0.511811 | 1.164860  |
| H | 0.886507  | -0.511865 | 1.164860  |
| H | 0.000032  | -1.023684 | -1.164870 |
| H | -0.886539 | 0.511811  | -1.164861 |
| H | 0.886508  | 0.511865  | -1.164861 |

**TS: DGT**

**E** = -1602.75

**H** = -1524.59

**G** = -1544.93

**N<sub>imag</sub>** = 1, -1419.043i cm<sup>-1</sup>

|   |           |           |           |
|---|-----------|-----------|-----------|
| C | 1.342416  | 0.710731  | 0.000000  |
| C | 1.342415  | -0.710731 | 0.000000  |
| C | -1.342415 | -0.710731 | 0.000000  |
| C | -1.342414 | 0.710731  | 0.000000  |
| H | 1.636963  | 1.232074  | 0.914924  |
| H | 1.636963  | 1.232074  | -0.914924 |
| H | -0.000000 | 0.993152  | -0.000000 |
| H | 1.636963  | -1.232074 | 0.914924  |
| H | 1.636963  | -1.232074 | -0.914924 |
| H | -0.000000 | -0.993152 | -0.000000 |
| H | -1.636963 | -1.232074 | 0.914924  |
| H | -1.636963 | -1.232074 | -0.914924 |
| H | -1.636963 | 1.232074  | 0.914924  |
| H | -1.636963 | 1.232074  | -0.914924 |

**Table S6.** Cartesian coordinates (in Å), energies (in kcal mol<sup>-1</sup>), and number of imaginary frequencies of all stationary points, computed at BP86/TZ2P.

**Butadiene (B)**

**E** = -1294.32

**H** = -1239.01

**G** = -1258.99

**N<sub>imag</sub>** = 0

|   |           |           |           |
|---|-----------|-----------|-----------|
| C | 1.372973  | -0.713387 | -0.499661 |
| C | 0.701870  | -0.211314 | 0.547730  |
| C | -0.701870 | 0.211314  | 0.547730  |
| C | -1.372973 | 0.713387  | -0.499661 |
| H | 0.889690  | -0.878529 | -1.463676 |
| H | 2.423410  | -0.989486 | -0.417905 |
| H | 1.222395  | -0.125776 | 1.506665  |
| H | -1.222395 | 0.125776  | 1.506665  |
| H | -0.889690 | 0.878529  | -1.463676 |
| H | -2.423410 | 0.989486  | -0.417905 |

**Ethylene (E)**

**E** = -729.02

**H** = -695.42

**G** = -711.04

**N<sub>imag</sub>** = 0

|   |           |           |           |
|---|-----------|-----------|-----------|
| C | 0.666078  | 0.000000  | 0.000000  |
| C | -0.666078 | 0.000000  | -0.000000 |
| H | 1.239044  | -0.928195 | 0.000000  |
| H | 1.239044  | 0.928195  | 0.000000  |
| H | -1.239044 | -0.928195 | -0.000000 |
| H | -1.239044 | 0.928195  | -0.000000 |

**TS: DA**

**E** = -2008.13

**H** = -1918.34

**G** = -1941.87

**N<sub>imag</sub>** = 1, -439.759i cm<sup>-1</sup>

|   |           |           |           |
|---|-----------|-----------|-----------|
| C | 1.794194  | -0.563001 | -1.014172 |
| C | 1.568352  | -1.655043 | -0.196824 |
| C | 0.269821  | -2.109924 | 0.104832  |
| C | -0.861121 | -1.493055 | -0.397314 |
| H | 1.085504  | 0.261248  | -1.047841 |
| H | 2.808635  | -0.311661 | -1.323530 |
| H | 2.408765  | -2.307241 | 0.051886  |
| H | 0.168296  | -3.092083 | 0.572325  |
| H | -0.869154 | -0.423362 | -0.593514 |
| H | -1.842786 | -1.940714 | -0.242749 |
| C | -0.522871 | -1.642801 | -2.654218 |
| C | 0.754052  | -1.195158 | -2.951366 |
| H | -1.381146 | -0.995419 | -2.829019 |
| H | -0.737809 | -2.708400 | -2.630317 |
| H | 0.899505  | -0.195829 | -3.359388 |

H 1.548628 -1.906820 -3.162179

**P: DA**

**E** = -2064.96

**H** = -1971.93

**G** = -1994.13

**N<sub>imag</sub>** = 0

|   |           |           |           |
|---|-----------|-----------|-----------|
| C | 1.912368  | -1.069606 | -1.529800 |
| C | 1.459889  | -1.463875 | -0.147285 |
| C | 0.192266  | -1.772754 | 0.155390  |
| C | -0.921135 | -1.804274 | -0.859978 |
| H | 2.595696  | -0.207938 | -1.462109 |
| H | 2.517238  | -1.886382 | -1.963940 |
| H | 2.219264  | -1.488375 | 0.638654  |
| H | -0.066010 | -2.023259 | 1.187615  |
| H | -1.598617 | -0.948357 | -0.687025 |
| H | -1.540940 | -2.700978 | -0.699417 |
| C | -0.390748 | -1.775792 | -2.301437 |
| C | 0.729983  | -0.739133 | -2.453137 |
| H | -1.210151 | -1.568271 | -3.004507 |
| H | 0.003909  | -2.771885 | -2.560038 |
| H | 0.336080  | 0.256585  | -2.191960 |
| H | 1.067397  | -0.681432 | -3.497942 |

**Methylazide (MA)**

**E** = -978.03

**H** = -943.98

**G** = -964.08

**N<sub>imag</sub>** = 0

|   |           |           |           |
|---|-----------|-----------|-----------|
| N | 1.015408  | 0.132362  | -0.273421 |
| N | -0.100404 | -0.032138 | -0.068465 |
| N | -1.314929 | -0.051388 | 0.135508  |
| C | -1.925774 | -1.366367 | 0.397012  |
| H | -2.992826 | -1.189246 | 0.554925  |
| H | -1.504263 | -1.834793 | 1.298737  |
| H | -1.799451 | -2.046922 | -0.458016 |

**TS: 1,3-DC**

**E** = -1691.54

**H** = -1623.37

**G** = -1647.65

**N<sub>imag</sub>** = 1, -351.971i cm<sup>-1</sup>

|   |           |           |           |
|---|-----------|-----------|-----------|
| N | -1.485579 | -2.555466 | -0.135033 |
| N | -2.612270 | -2.206284 | -0.161471 |
| N | -3.261002 | -1.131924 | -0.317303 |
| C | -4.592925 | -0.998233 | 0.265651  |
| H | -4.938033 | 0.013869  | 0.029339  |
| H | -4.590702 | -1.127716 | 1.359436  |
| H | -5.299347 | -1.712236 | -0.180868 |
| C | -0.520204 | -0.638473 | -0.151744 |
| C | -1.576424 | 0.250494  | -0.198329 |

|   |           |           |           |
|---|-----------|-----------|-----------|
| H | 0.033394  | -0.880706 | -1.057233 |
| H | -0.014569 | -0.848906 | 0.788136  |
| H | -1.871669 | 0.716185  | -1.135909 |
| H | -1.927844 | 0.741320  | 0.708696  |

**P: 1,3-DC**

**E** = -1727.16

**H** = -1656.66

**G** = -1679.22

**N<sub>imag</sub>** = 0

|   |           |           |           |
|---|-----------|-----------|-----------|
| N | -1.626675 | -2.613453 | -0.056594 |
| N | -2.877984 | -2.541208 | -0.092136 |
| N | -3.340169 | -1.257523 | -0.313679 |
| C | -4.682239 | -0.973279 | 0.158636  |
| H | -5.111392 | -0.143155 | -0.416295 |
| H | -4.695694 | -0.706449 | 1.231617  |
| H | -5.296541 | -1.866715 | 0.006296  |
| C | -1.045538 | -1.247184 | -0.255996 |
| C | -2.242377 | -0.308813 | -0.070733 |
| H | -0.637353 | -1.209667 | -1.278234 |
| H | -0.222011 | -1.089639 | 0.448586  |
| H | -2.270309 | 0.518743  | -0.788505 |
| H | -2.307750 | 0.104356  | 0.954032  |

**TS: ER**

**E** = -1254.39

**H** = -1200.45

**G** = -1219.18

**N<sub>imag</sub>** = 1, -685.395i cm<sup>-1</sup>

|   |           |           |           |
|---|-----------|-----------|-----------|
| C | -1.036503 | 0.732374  | 0.040887  |
| C | -0.625730 | -0.571044 | 0.460915  |
| C | 0.724102  | -0.606863 | 0.191864  |
| C | 1.104818  | 0.768394  | 0.104029  |
| H | -0.910924 | 1.002860  | -1.004641 |
| H | -1.810847 | 1.311699  | 0.561696  |
| H | -1.252699 | -1.310994 | 0.963110  |
| H | 1.369032  | -1.465488 | -0.007259 |
| H | 0.969061  | 1.399948  | 0.978546  |
| H | 1.868562  | 1.133585  | -0.595806 |

**P: ER**

**E** = -1285.51

**H** = -1229.94

**G** = -1248.68

**N<sub>imag</sub>** = 0

|   |           |           |           |
|---|-----------|-----------|-----------|
| C | -0.744906 | 0.796855  | -0.018859 |
| C | -0.627538 | -0.684895 | 0.292669  |
| C | 0.710926  | -0.657355 | 0.415303  |
| C | 0.822408  | 0.829104  | 0.124861  |
| H | -1.121102 | 1.048717  | -1.020995 |
| H | -1.288193 | 1.401906  | 0.721410  |

|   |           |           |           |
|---|-----------|-----------|-----------|
| H | -1.373437 | -1.475521 | 0.381474  |
| H | 1.459856  | -1.417237 | 0.641136  |
| H | 1.196869  | 1.452938  | 0.949400  |
| H | 1.363987  | 1.099959  | -0.793060 |

**(Z)-penta-1,3-diene (P)**

**E** = -1672.19

**H** = -1598.71

**G** = -1621.39

**N<sub>imag</sub>** = 0

|   |           |           |           |
|---|-----------|-----------|-----------|
| C | -1.845053 | 0.285954  | -0.252571 |
| C | -0.896170 | 1.163728  | 0.115941  |
| C | 0.550746  | 1.051029  | -0.062207 |
| C | 1.319242  | -0.057631 | -0.049531 |
| C | 0.881886  | -1.471789 | 0.177332  |
| H | -2.898361 | 0.492817  | -0.065443 |
| H | -1.611909 | -0.638616 | -0.778762 |
| H | -1.227650 | 2.100702  | 0.576335  |
| H | 1.071560  | 2.006800  | -0.173150 |
| H | 2.393454  | 0.089142  | -0.192564 |
| H | 1.629201  | -2.017747 | 0.770126  |
| H | 0.778949  | -2.018168 | -0.774776 |
| H | -0.087172 | -1.523691 | 0.690867  |

**TS: SR**

**E** = -1643.99

**H** = -1573.49

**G** = -1594.24

**N<sub>imag</sub>** = 1, -1362.913i cm<sup>-1</sup>

|   |           |           |           |
|---|-----------|-----------|-----------|
| C | -1.524474 | -0.013102 | -0.092843 |
| C | -0.707221 | 1.143481  | -0.163880 |
| C | 0.687150  | 1.086946  | -0.250375 |
| C | 1.362680  | -0.096496 | 0.062836  |
| C | 0.715469  | -1.354938 | 0.152398  |
| H | -2.515001 | 0.114791  | 0.356003  |
| H | -1.552507 | -0.696321 | -0.944672 |
| H | -1.137092 | 2.109219  | 0.116861  |
| H | 1.247188  | 2.023161  | -0.243233 |
| H | 2.359130  | 0.014768  | 0.499844  |
| H | 1.210044  | -2.116866 | 0.763803  |
| H | 0.267319  | -1.786359 | -0.745510 |
| H | -0.579769 | -0.889310 | 0.507538  |

**Ethane (Et)**

**E** = -923.07

**H** = -874.79

**G** = -891.06

**N<sub>imag</sub>** = 0

|   |          |           |           |
|---|----------|-----------|-----------|
| C | 0.000000 | -0.000002 | 0.765181  |
| C | 0.000000 | 0.000002  | -0.765182 |
| H | 0.000071 | 1.022833  | 1.166039  |

|   |           |           |           |
|---|-----------|-----------|-----------|
| H | -0.885828 | -0.511351 | 1.166031  |
| H | 0.885757  | -0.511473 | 1.166031  |
| H | 0.000071  | -1.022833 | -1.166039 |
| H | -0.885828 | 0.511351  | -1.166031 |
| H | 0.885758  | 0.511474  | -1.166032 |

**TS: DGT**

**E** = -1613.98

**H** = -1535.75

**G** = -1556.05

**N<sub>imag</sub>** = 1, -1402.654i cm<sup>-1</sup>

|   |           |           |           |
|---|-----------|-----------|-----------|
| C | 1.344882  | 0.711606  | 0.000000  |
| C | 1.344882  | -0.711606 | 0.000000  |
| C | -1.344881 | -0.711606 | 0.000000  |
| C | -1.344881 | 0.711606  | 0.000000  |
| H | 1.638469  | 1.233567  | 0.913816  |
| H | 1.638469  | 1.233567  | -0.913816 |
| H | -0.000000 | 0.989454  | -0.000000 |
| H | 1.638468  | -1.233567 | 0.913816  |
| H | 1.638468  | -1.233567 | -0.913816 |
| H | -0.000000 | -0.989454 | -0.000000 |
| H | -1.638469 | -1.233567 | 0.913815  |
| H | -1.638469 | -1.233567 | -0.913815 |
| H | -1.638469 | 1.233567  | 0.913816  |
| H | -1.638469 | 1.233567  | -0.913816 |

**Table S7.** Cartesian coordinates (in Å), energies (in kcal mol<sup>-1</sup>), and number of imaginary frequencies of all stationary points, computed at BP86/QZ4P.

**Butadiene (B)**

**E** = -1296.96

**H** = -1241.69

**G** = -1261.66

**N<sub>imag</sub>** = 0

|   |           |           |           |
|---|-----------|-----------|-----------|
| C | 1.372128  | -0.715849 | -0.498970 |
| C | 0.702432  | -0.209641 | 0.547858  |
| C | -0.702432 | 0.209641  | 0.547858  |
| C | -1.372128 | 0.715849  | -0.498969 |
| H | 0.886617  | -0.887995 | -1.460041 |
| H | 2.423245  | -0.988288 | -0.420019 |
| H | 1.224767  | -0.116974 | 1.504325  |
| H | -1.224767 | 0.116974  | 1.504325  |
| H | -0.886617 | 0.887995  | -1.460041 |
| H | -2.423245 | 0.988288  | -0.420020 |

**Ethylene (E)**

**E** = -730.29

**H** = -696.73

**G** = -712.35

**N<sub>imag</sub>** = 0

|   |           |           |           |
|---|-----------|-----------|-----------|
| C | 0.666262  | -0.000000 | -0.000000 |
| C | -0.666262 | -0.000000 | 0.000000  |
| H | 1.239846  | -0.927122 | -0.000000 |
| H | 1.239846  | 0.927122  | -0.000000 |
| H | -1.239846 | -0.927122 | 0.000000  |
| H | -1.239846 | 0.927122  | 0.000000  |

**TS: DA**

**E** = -2012.25

**H** = -1922.51

**G** = -1946.06

**N<sub>imag</sub>** = 1, -437.023i cm<sup>-1</sup>

|   |           |           |           |
|---|-----------|-----------|-----------|
| C | 1.795040  | -0.562353 | -1.012840 |
| C | 1.568817  | -1.655407 | -0.196807 |
| C | 0.269694  | -2.110477 | 0.105013  |
| C | -0.861619 | -1.492850 | -0.395563 |
| H | 1.086496  | 0.261342  | -1.048621 |
| H | 2.808866  | -0.310416 | -1.322323 |
| H | 2.408661  | -2.307370 | 0.051503  |
| H | 0.168259  | -3.092156 | 0.571990  |
| H | -0.870293 | -0.424000 | -0.593751 |
| H | -1.843228 | -1.939741 | -0.241238 |
| C | -0.523015 | -1.643271 | -2.655920 |
| C | 0.753859  | -1.195648 | -2.953043 |
| H | -1.381540 | -0.996397 | -2.828752 |
| H | -0.738934 | -2.708191 | -2.630616 |
| H | 0.900574  | -0.196317 | -3.359442 |

H 1.549229 -1.906011 -3.162978

**P: DA**

**E** = -2069.63

**H** = -1976.62

**G** = -1998.81

**N<sub>imag</sub>** = 0

|   |           |           |           |
|---|-----------|-----------|-----------|
| C | -0.951522 | -1.858615 | -1.648114 |
| C | -0.506018 | -1.889319 | -0.208769 |
| C | 0.724085  | -1.540870 | 0.191950  |
| C | 1.791603  | -1.035562 | -0.744061 |
| H | -1.521371 | -2.772902 | -1.877404 |
| H | -1.666305 | -1.028791 | -1.792997 |
| H | -1.236337 | -2.221353 | 0.532873  |
| H | 0.982934  | -1.615124 | 1.250783  |
| H | 2.573920  | -1.807155 | -0.858697 |
| H | 2.302767  | -0.172519 | -0.289002 |
| C | 1.221484  | -0.651963 | -2.117896 |
| C | 0.231821  | -1.712826 | -2.616687 |
| H | 2.036015  | -0.509043 | -2.842007 |
| H | 0.699989  | 0.314999  | -2.034562 |
| H | 0.752722  | -2.680313 | -2.697635 |
| H | -0.129302 | -1.464362 | -3.624687 |

**Methylazide (MA)**

**E** = -980.32

**H** = -946.27

**G** = -966.38

**N<sub>imag</sub>** = 0

|   |           |           |           |
|---|-----------|-----------|-----------|
| N | 1.015329  | 0.131679  | -0.273371 |
| N | -0.100323 | -0.031827 | -0.068515 |
| N | -1.315010 | -0.050155 | 0.135430  |
| C | -1.925762 | -1.366644 | 0.397049  |
| H | -2.992374 | -1.190010 | 0.554899  |
| H | -1.504530 | -1.834744 | 1.298473  |
| H | -1.799568 | -2.046791 | -0.457686 |

**TS: 1,3-DC**

**E** = -1695.19

**H** = -1627.05

**G** = -1651.37

**N<sub>imag</sub>** = 1, -352.825i cm<sup>-1</sup>

|   |           |           |           |
|---|-----------|-----------|-----------|
| N | -1.485970 | -2.552987 | -0.134555 |
| N | -2.611816 | -2.201837 | -0.156315 |
| N | -3.261432 | -1.128254 | -0.306705 |
| C | -4.598883 | -1.000504 | 0.266278  |
| H | -4.945052 | 0.011144  | 0.031453  |
| H | -4.605148 | -1.134112 | 1.359088  |
| H | -5.299404 | -1.714512 | -0.188589 |
| C | -0.516529 | -0.639111 | -0.154053 |
| C | -1.570852 | 0.252683  | -0.198837 |



|   |           |           |           |
|---|-----------|-----------|-----------|
| H | 0.034376  | -0.884133 | -1.059840 |
| H | -0.008312 | -0.849644 | 0.783855  |
| H | -1.869395 | 0.716629  | -1.135670 |
| H | -1.918758 | 0.746562  | 0.707258  |

**P: 1,3-DC**

**E** = -1731.40

**H** = -1660.92

**G** = -1683.49

**N<sub>imag</sub>** = 0

|   |           |           |           |
|---|-----------|-----------|-----------|
| N | -1.625729 | -2.614444 | -0.059777 |
| N | -2.877926 | -2.541265 | -0.091621 |
| N | -3.339505 | -1.257176 | -0.307133 |
| C | -4.683886 | -0.972897 | 0.158089  |
| H | -5.113230 | -0.147909 | -0.423552 |
| H | -4.703285 | -0.699158 | 1.228824  |
| H | -5.295320 | -1.868416 | 0.009054  |
| C | -1.044524 | -1.247052 | -0.257560 |
| C | -2.240626 | -0.308983 | -0.067508 |
| H | -0.638027 | -1.208198 | -1.279888 |
| H | -0.219376 | -1.091748 | 0.444721  |
| H | -2.271789 | 0.519389  | -0.783720 |
| H | -2.302808 | 0.103872  | 0.957066  |

**TS: ER**

**E** = -1257.33

**H** = -1203.40

**G** = -1222.13

**N<sub>imag</sub>** = 1, -685.650i cm<sup>-1</sup>

|   |           |           |           |
|---|-----------|-----------|-----------|
| C | -1.036763 | 0.731313  | 0.040672  |
| C | -0.626061 | -0.571812 | 0.461060  |
| C | 0.724439  | -0.607613 | 0.192022  |
| C | 1.105103  | 0.767499  | 0.104630  |
| H | -0.909320 | 1.004804  | -1.003423 |
| H | -1.810072 | 1.311479  | 0.561112  |
| H | -1.252704 | -1.310616 | 0.964023  |
| H | 1.369022  | -1.465474 | -0.008273 |
| H | 0.967447  | 1.401314  | 0.976713  |
| H | 1.867781  | 1.133576  | -0.595196 |

**P: ER**

**E** = -1288.69

**H** = -1233.13

**G** = -1251.86

**N<sub>imag</sub>** = 0

|   |           |           |           |
|---|-----------|-----------|-----------|
| C | -0.744576 | 0.796404  | -0.018731 |
| C | -0.627835 | -0.685103 | 0.292666  |
| C | 0.711221  | -0.657539 | 0.415392  |
| C | 0.822078  | 0.828646  | 0.124928  |
| H | -1.121168 | 1.048915  | -1.020123 |
| H | -1.288073 | 1.401704  | 0.720583  |

|   |           |           |           |
|---|-----------|-----------|-----------|
| H | -1.373695 | -1.474884 | 0.381256  |
| H | 1.460103  | -1.416571 | 0.641083  |
| H | 1.196967  | 1.452791  | 0.948514  |
| H | 1.363849  | 1.100107  | -0.792229 |

**(Z)-penta-1,3-diene (P)**

**E** = -1288.69

**H** = -1233.13

**G** = -1251.86

**N<sub>imag</sub>** = 0

|   |           |           |           |
|---|-----------|-----------|-----------|
| C | -1.846434 | 0.289405  | -0.256294 |
| C | -0.896129 | 1.162395  | 0.120879  |
| C | 0.550312  | 1.050670  | -0.064716 |
| C | 1.319004  | -0.058293 | -0.053583 |
| C | 0.883022  | -1.471700 | 0.180356  |
| H | -2.898910 | 0.491875  | -0.062462 |
| H | -1.614949 | -0.627321 | -0.795872 |
| H | -1.225307 | 2.092487  | 0.595085  |
| H | 1.069867  | 2.005839  | -0.180676 |
| H | 2.391827  | 0.087759  | -0.203298 |
| H | 1.625459  | -2.011109 | 0.784682  |
| H | 0.791062  | -2.026695 | -0.767321 |
| H | -0.090102 | -1.522781 | 0.684818  |

**TS: SR**

**E** = -1647.45

**H** = -1576.99

**G** = -1597.75

**N<sub>imag</sub>** = 1, -1362.402i cm<sup>-1</sup>

|   |           |           |           |
|---|-----------|-----------|-----------|
| C | -1.524305 | -0.013290 | -0.092896 |
| C | -0.707176 | 1.143809  | -0.163554 |
| C | 0.687645  | 1.087845  | -0.249974 |
| C | 1.362888  | -0.096270 | 0.063169  |
| C | 0.715241  | -1.354894 | 0.152281  |
| H | -2.514310 | 0.113744  | 0.356290  |
| H | -1.553450 | -0.696111 | -0.944367 |
| H | -1.137261 | 2.108786  | 0.117019  |
| H | 1.247423  | 2.023392  | -0.244010 |
| H | 2.358788  | 0.014430  | 0.499974  |
| H | 1.208780  | -2.116731 | 0.763872  |
| H | 0.267872  | -1.787065 | -0.745037 |
| H | -0.579220 | -0.888671 | 0.506002  |

**Ethane (Et)**

**E** = -924.59

**H** = -876.32

**G** = -892.58

**N<sub>imag</sub>** = 0

|   |          |           |           |
|---|----------|-----------|-----------|
| C | 0.000000 | -0.000001 | 0.765249  |
| C | 0.000000 | 0.000001  | -0.765249 |
| H | 0.000238 | 1.022102  | 1.166820  |

|   |           |           |           |
|---|-----------|-----------|-----------|
| H | 0.885040  | -0.511253 | 1.166812  |
| H | -0.885278 | -0.510840 | 1.166811  |
| H | 0.000238  | -1.022101 | -1.166820 |
| H | -0.885278 | 0.510840  | -1.166812 |
| H | 0.885040  | 0.511253  | -1.166812 |

**TS: DGT**

**E** = -1616.79

**H** = -1538.58

**G** = -1559.30

**N<sub>imag</sub>** = 1, -1400.354i cm<sup>-1</sup>

|   |           |           |           |
|---|-----------|-----------|-----------|
| C | 1.344203  | 0.711756  | 0.000000  |
| C | 1.344203  | -0.711756 | 0.000000  |
| C | -1.344203 | -0.711756 | 0.000000  |
| C | -1.344202 | 0.711756  | 0.000000  |
| H | 1.638170  | 1.233852  | 0.913072  |
| H | 1.638170  | 1.233852  | -0.913072 |
| H | -0.000000 | 0.989347  | -0.000000 |
| H | 1.638170  | -1.233852 | 0.913071  |
| H | 1.638170  | -1.233852 | -0.913071 |
| H | 0.000000  | -0.989348 | -0.000000 |
| H | -1.638170 | -1.233852 | 0.913071  |
| H | -1.638170 | -1.233852 | -0.913071 |
| H | -1.638170 | 1.233852  | 0.913072  |
| H | -1.638170 | 1.233852  | -0.913072 |

**Table S8.** Cartesian coordinates (in Å), energies (in kcal mol<sup>-1</sup>), and number of imaginary frequencies of all stationary points, computed at BP86-D3(BJ)/QZ4P.

**Butadiene (B)**

**E** = -1303.14

**H** = -1247.85

**G** = -1267.81

**N<sub>imag</sub>** = 0

|   |           |           |           |
|---|-----------|-----------|-----------|
| C | 1.367363  | -0.713678 | -0.499293 |
| C | 0.702298  | -0.208608 | 0.550553  |
| C | -0.702299 | 0.208608  | 0.550553  |
| C | -1.367363 | 0.713678  | -0.499292 |
| H | 0.875452  | -0.885408 | -1.457044 |
| H | 2.419020  | -0.984786 | -0.426394 |
| H | 1.226954  | -0.114755 | 1.505330  |
| H | -1.226954 | 0.114755  | 1.505330  |
| H | -0.875452 | 0.885408  | -1.457044 |
| H | -2.419020 | 0.984786  | -0.426394 |

**Ethylene (E)**

**E** = -732.38

**H** = -698.81

**G** = -714.44

**N<sub>imag</sub>** = 0

|   |           |           |          |
|---|-----------|-----------|----------|
| C | 0.666218  | -0.000000 | 0.000000 |
| C | -0.666218 | -0.000000 | 0.000000 |
| H | 1.239598  | -0.927165 | 0.000000 |
| H | 1.239598  | 0.927165  | 0.000000 |
| H | -1.239598 | -0.927165 | 0.000000 |
| H | -1.239598 | 0.927165  | 0.000000 |

**TS: DA**

**E** = -2026.70

**H** = -1936.90

**G** = -1960.41

**N<sub>imag</sub>** = 1, -421731i cm<sup>-1</sup>

|   |           |           |           |
|---|-----------|-----------|-----------|
| C | 1.792034  | -0.558643 | -1.009401 |
| C | 1.568057  | -1.656431 | -0.202123 |
| C | 0.268798  | -2.111612 | 0.099763  |
| C | -0.860400 | -1.487780 | -0.392964 |
| H | 1.078021  | 0.259958  | -1.046523 |
| H | 2.803747  | -0.303468 | -1.321531 |
| H | 2.407460  | -2.311339 | 0.038053  |
| H | 0.166325  | -3.096488 | 0.558781  |
| H | -0.862866 | -0.419907 | -0.595302 |
| H | -1.843445 | -1.931339 | -0.241420 |
| C | -0.520899 | -1.645680 | -2.655588 |
| C | 0.754098  | -1.198918 | -2.952151 |
| H | -1.379930 | -0.999381 | -2.825839 |
| H | -0.735353 | -2.710190 | -2.619216 |
| H | 0.902843  | -0.199488 | -3.356629 |

H 1.552375 -1.908558 -3.151298

**P: DA**

**E** = -2082.77

**H** = -1989.69

**G** = -2011.87

**N<sub>imag</sub>** = 0

|   |           |           |           |
|---|-----------|-----------|-----------|
| C | 1.910877  | -1.071296 | -1.531346 |
| C | 1.459560  | -1.465053 | -0.149622 |
| C | 0.191464  | -1.771040 | 0.153627  |
| C | -0.920521 | -1.802000 | -0.861509 |
| H | 2.596610  | -0.212429 | -1.464492 |
| H | 2.511047  | -1.889240 | -1.967968 |
| H | 2.218615  | -1.490838 | 0.635233  |
| H | -0.066920 | -2.020193 | 1.185125  |
| H | -1.594946 | -0.943793 | -0.692671 |
| H | -1.542779 | -2.695843 | -0.699629 |
| C | -0.387276 | -1.778361 | -2.300363 |
| C | 0.727705  | -0.737266 | -2.449856 |
| H | -1.204790 | -1.578638 | -3.006792 |
| H | 0.014353  | -2.772709 | -2.552119 |
| H | 0.331045  | 0.254384  | -2.180218 |
| H | 1.062444  | -0.671411 | -3.494315 |

**Methylazide (MA)**

**E** = -983.85

**H** = -949.79

**G** = -969.90

**N<sub>imag</sub>** = 0

|   |           |            |           |
|---|-----------|------------|-----------|
| N | 1.013554  | 0.1260680  | -0.272376 |
| N | -0.102777 | -0.0320520 | -0.068082 |
| N | -1.317428 | -0.0478320 | 0.135529  |
| C | -1.925199 | -1.3656240 | 0.396830  |
| H | -2.992050 | -1.1918320 | 0.555080  |
| H | -1.501646 | -1.8325870 | 1.297657  |
| H | -1.796691 | -2.0446340 | -0.458360 |

**TS: 1,3-DC**

**E** = -1705.05

**H** = -1636.87

**G** = -1661.12

**N<sub>imag</sub>** = 1, -346.860i cm<sup>-1</sup>

|   |           |           |           |
|---|-----------|-----------|-----------|
| N | -1.492502 | -2.569506 | -0.147701 |
| N | -2.613619 | -2.211131 | -0.187799 |
| N | -3.263994 | -1.140557 | -0.354275 |
| C | -4.576587 | -0.991858 | 0.267053  |
| H | -4.924283 | 0.016918  | 0.023479  |
| H | -4.538313 | -1.102204 | 1.361687  |
| H | -5.298182 | -1.711041 | -0.143928 |
| C | -0.525688 | -0.631857 | -0.140571 |
| C | -1.589620 | 0.245418  | -0.199313 |

|   |            |          |          |
|---|------------|----------|----------|
| H | 0.0418270  | -0.87017 | -1.03758 |
| H | -0.0379240 | -0.85123 | 0.80581  |
| H | -1.8752610 | 0.71388  | -1.13768 |
| H | -1.9630290 | 0.72527  | 0.70418  |

**P: 1,3-DC**

**E** = -1740.90

**H** = -1670.37

**G** = -1692.93

**N<sub>imag</sub>** = 0

|   |           |           |           |
|---|-----------|-----------|-----------|
| N | -1.626377 | -2.613068 | -0.053768 |
| N | -2.878228 | -2.541497 | -0.090872 |
| N | -3.339462 | -1.258195 | -0.314538 |
| C | -4.680387 | -0.972717 | 0.157042  |
| H | -5.108423 | -0.143713 | -0.419257 |
| H | -4.692552 | -0.703516 | 1.228905  |
| H | -5.294662 | -1.865832 | 0.007011  |
| C | -1.046450 | -1.246187 | -0.256290 |
| C | -2.243039 | -0.309912 | -0.069279 |
| H | -0.641900 | -1.210598 | -1.279320 |
| H | -0.221488 | -1.087596 | 0.444951  |
| H | -2.273068 | 0.519390  | -0.783826 |
| H | -2.309995 | 0.099456  | 0.956236  |

**TS: ER**

**E** = -1263.74

**H** = -1209.83

**G** = -1228.55

**N<sub>imag</sub>** = 1, -675.325i cm<sup>-1</sup>

|   |           |           |           |
|---|-----------|-----------|-----------|
| C | -1.036692 | 0.732398  | 0.039873  |
| C | -0.626090 | -0.573051 | 0.459552  |
| C | 0.724490  | -0.608211 | 0.193881  |
| C | 1.105001  | 0.768803  | 0.104973  |
| H | -0.913258 | 1.003041  | -1.005495 |
| H | -1.805625 | 1.314749  | 0.563709  |
| H | -1.253768 | -1.313346 | 0.958587  |
| H | 1.370122  | -1.466000 | -0.002222 |
| H | 0.971405  | 1.400518  | 0.979266  |
| H | 1.863287  | 1.135569  | -0.598783 |

**P: ER**

**E** = -1294.70

**H** = -1239.12

**G** = -1257.85

**N<sub>imag</sub>** = 0

|   |           |           |           |
|---|-----------|-----------|-----------|
| C | -0.744710 | 0.796654  | -0.018795 |
| C | -0.627907 | -0.685209 | 0.292687  |
| C | 0.711293  | -0.657645 | 0.415413  |
| C | 0.822211  | 0.828901  | 0.124884  |
| H | -1.120734 | 1.048705  | -1.020250 |
| H | -1.287680 | 1.401593  | 0.720841  |

|   |           |           |           |
|---|-----------|-----------|-----------|
| H | -1.373783 | -1.474693 | 0.381228  |
| H | 1.460189  | -1.416383 | 0.641040  |
| H | 1.196525  | 1.452640  | 0.948714  |
| H | 1.363466  | 1.099908  | -0.792422 |

**(Z)-penta-1,3-diene (P)**

**E** = -1684.91

**H** = -1611.42

**G** = -1634.03

**N<sub>imag</sub>** = 0

|   |           |            |           |
|---|-----------|------------|-----------|
| C | -1.829789 | 0.2747670  | -0.256120 |
| C | -0.890880 | 1.1612690  | 0.117288  |
| C | 0.555237  | 1.0568980  | -0.062892 |
| C | 1.319911  | -0.0541220 | -0.050355 |
| C | 0.869268  | -1.4627090 | 0.179720  |
| H | -2.884979 | 0.4662460  | -0.067460 |
| H | -1.584760 | -0.6421830 | -0.788567 |
| H | -1.229868 | 2.0910850  | 0.584257  |
| H | 1.074582  | 2.0120830  | -0.175298 |
| H | 2.393867  | 0.0855790  | -0.194960 |
| H | 1.618314  | -2.0209890 | 0.757179  |
| H | 0.738814  | -2.0043580 | -0.770923 |
| H | -0.090997 | -1.5010350 | 0.709728  |

**TS: SR**

**E** = -1657.21

**H** = -1586.88

**G** = -160.66

**N<sub>imag</sub>** = 1, -1423.633i cm<sup>-1</sup>

|   |           |           |           |
|---|-----------|-----------|-----------|
| C | -1.527803 | -0.009236 | -0.097551 |
| C | -0.706411 | 1.144037  | -0.164418 |
| C | 0.688081  | 1.086329  | -0.247776 |
| C | 1.362645  | -0.097565 | 0.065700  |
| C | 0.718792  | -1.357369 | 0.152126  |
| H | -2.520090 | 0.120631  | 0.344697  |
| H | -1.548662 | -0.696410 | -0.945415 |
| H | -1.134887 | 2.109915  | 0.114600  |
| H | 1.248178  | 2.021298  | -0.239197 |
| H | 2.357906  | 0.013889  | 0.503186  |
| H | 1.214292  | -2.120505 | 0.759735  |
| H | 0.264781  | -1.784459 | -0.743960 |
| H | -0.583906 | -0.891580 | 0.517039  |

**Ethane (Et)**

**E** = -927.44

**H** = -879.15

**G** = -895.42

**N<sub>imag</sub>** = 0

|   |          |           |           |
|---|----------|-----------|-----------|
| C | 0.000000 | -0.000001 | 0.765090  |
| C | 0.000000 | 0.000001  | -0.765090 |
| H | 0.000031 | 1.022145  | 1.166307  |

|   |           |           |           |
|---|-----------|-----------|-----------|
| H | -0.885212 | -0.511040 | 1.166299  |
| H | 0.885180  | -0.511096 | 1.166299  |
| H | 0.000032  | -1.022144 | -1.166307 |
| H | -0.885212 | 0.511041  | -1.166299 |
| H | 0.885180  | 0.511096  | -1.166299 |

**TS: DGT**

**E** = -1626.16

**H** = -1545.45

**G** = -1567.88

**N<sub>imag</sub>** = 1, -1533.880i cm<sup>-1</sup>

|   |           |           |           |
|---|-----------|-----------|-----------|
| C | 1.346261  | 0.711421  | 0.000000  |
| C | 1.346261  | -0.711421 | 0.000000  |
| C | -1.346261 | -0.711421 | 0.000000  |
| C | -1.346260 | 0.711421  | 0.000000  |
| H | 1.637957  | 1.233686  | 0.913453  |
| H | 1.637957  | 1.233686  | -0.913453 |
| H | -0.000000 | 0.990912  | 0.000000  |
| H | 1.637957  | -1.233686 | 0.913453  |
| H | 1.637957  | -1.233686 | -0.913453 |
| H | -0.000000 | -0.990912 | -0.000000 |
| H | -1.637957 | -1.233686 | 0.913453  |
| H | -1.637957 | -1.233686 | -0.913453 |
| H | -1.637957 | 1.233686  | 0.913453  |
| H | -1.637957 | 1.233686  | -0.913453 |



**Table S9.** Global-minimum Cartesian root-mean-square deviation (RMSD) values (in Å) of the fully optimized geometries at various DFT levels of theory with respect to the CCSD(T)/cc-pVTZ benchmarks.

|                        | BP86/DZ  | BP86/DZP | BP86/TZ2P | BP86/QZ4P | BP86-D3(BJ)/QZ4P |
|------------------------|----------|----------|-----------|-----------|------------------|
| <b>B</b>               | 0.037158 | 0.024089 | 0.049918  | 0.044318  | 0.039359         |
| <b>E</b>               | 0.009316 | 0.005545 | 0.005675  | 0.005727  | 0.005574         |
| <b>TS-DA</b>           | 0.037869 | 0.028260 | 0.031486  | 0.032080  | 0.026029         |
| <b>P-DA</b>            | 0.018495 | 0.018281 | 0.027482  | 0.027223  | 0.020090         |
| <b>MA</b>              | 0.079993 | 0.030022 | 0.038587  | 0.038218  | 0.034785         |
| <b>TS-1,3-DC</b>       | 0.261398 | 0.103238 | 0.142519  | 0.150162  | 0.114478         |
| <b>P-1,3-DC</b>        | 0.146403 | 0.046991 | 0.067095  | 0.070897  | 0.065678         |
| <b>TS-ER</b>           | 0.024240 | 0.008738 | 0.006690  | 0.006966  | 0.007983         |
| <b>P-ER</b>            | 0.016836 | 0.006537 | 0.006435  | 0.006230  | 0.005990         |
| <b>P</b>               | 0.027782 | 0.037024 | 0.087841  | 0.078892  | 0.081561         |
| <b>TS-SR</b>           | 0.033426 | 0.020593 | 0.018638  | 0.018828  | 0.018096         |
| <b>Et</b>              | 0.011221 | 0.006931 | 0.007228  | 0.007463  | 0.007091         |
| <b>TS-DGT</b>          | 0.025224 | 0.010974 | 0.011855  | 0.011501  | 0.012013         |
| <b>AVG<sup>a</sup></b> | 0.056105 | 0.026709 | 0.038573  | 0.038347  | 0.033748         |
| <b>MAX<sup>a</sup></b> | 0.261398 | 0.103238 | 0.142519  | 0.150162  | 0.114478         |

<sup>a</sup> AVG = average global-minimum Cartesian root-mean-square deviation; MAX = maximum global-minimum Cartesian root-mean-square deviation.

**Table S10.** Average percentage errors of all geometric parameters of the fully optimized DFT geometries with respect to the CCSD(T)/cc-pVTZ benchmarks.

|           | Functional | Basis set        | B    | E   | TS-DA | P-DA | MA  | TS-1,3-DC | P-1,3-DC | TS-ER | P-ER <sup>c</sup> | P    | TS-SR | Et  | TS-DGT | AVG <sup>a</sup> | MAX <sup>a</sup> |     |
|-----------|------------|------------------|------|-----|-------|------|-----|-----------|----------|-------|-------------------|------|-------|-----|--------|------------------|------------------|-----|
| DISTANCES | BP86       | DZ               | 0.6  | 0.5 | 0.9   | 0.8  | 1.5 | 1.4       | 1.3      | 0.7   | 1.0               | 0.7  | 0.8   | 0.9 | 0.9    | 0.9              | 1.5              |     |
|           |            | DZP              | 0.6  | 0.5 | 0.7   | 0.5  | 0.5 | 0.7       | 0.6      | 0.4   | 0.4               | 0.6  | 0.5   | 0.3 | 0.5    | 0.5              | 0.7              |     |
|           |            | TZ2P             | 0.5  | 0.5 | 0.7   | 0.4  | 0.5 | 0.8       | 0.8      | 0.6   | 0.4               | 0.4  | 0.6   | 0.5 | 0.4    | 0.5              | 0.5              | 0.8 |
|           |            | QZ4P             | 0.5  | 0.5 | 0.7   | 0.4  | 0.5 | 0.8       | 0.8      | 0.6   | 0.4               | 0.4  | 0.5   | 0.4 | 0.3    | 0.4              | 0.5              | 0.8 |
|           |            | BP86-D3(BJ) QZ4P | 0.5  | 0.5 | 0.7   | 0.4  | 0.5 | 0.8       | 0.8      | 0.6   | 0.4               | 0.4  | 0.5   | 0.5 | 0.3    | 0.5              | 0.5              | 0.8 |
| ANGLES    | BP86       | DZ               | 0.4  | 0.3 | 0.3   | 0.2  | 1.5 | 0.8       | 1.1      | 0.2   | 0.3               | 0.2  | 0.3   | 0.1 | 0.6    | 0.5              | 1.5              |     |
|           |            | DZP              | 0.3  | 0.2 | 0.2   | 0.2  | 0.6 | 0.5       | 0.5      | 0.1   | 0.1               | 0.4  | 0.3   | 0.1 | 0.4    | 0.3              | 0.6              |     |
|           |            | TZ2P             | 0.6  | 0.3 | 0.3   | 0.3  | 0.7 | 0.8       | 0.8      | 0.7   | 0.2               | 0.2  | 0.6   | 0.3 | 0.2    | 0.3              | 0.4              | 0.8 |
|           |            | QZ4P             | 0.6  | 0.4 | 0.3   | 0.3  | 0.7 | 0.8       | 0.8      | 0.7   | 0.2               | 0.2  | 0.6   | 0.3 | 0.2    | 0.3              | 0.4              | 0.8 |
|           |            | BP86-D3(BJ) QZ4P | 0.5  | 0.4 | 0.3   | 0.2  | 0.6 | 0.7       | 0.7      | 0.7   | 0.2               | 0.2  | 0.5   | 0.3 | 0.2    | 0.3              | 0.4              | 0.7 |
| DIHEDRALS | BP86       | DZ               | 11.3 | –   | 0.9   | 2.8  | 0.2 | 14.5      | 21.4     | 1.3   | 0.1               | 18.3 | 1.9   | 0.0 | 0.9    | 6.1              | 21.4             |     |
|           |            | DZP              | 4.4  | –   | 0.8   | 2.4  | 0.1 | 12.9      | 5.8      | 1.0   | 0.0               | 8.3  | 1.3   | 0.0 | 0.1    | 3.1              | 12.9             |     |
|           |            | TZ2P             | 4.3  | –   | 1.2   | 2.9  | 0.1 | 28.3      | 9.6      | 0.9   | 0.0               | 15.8 | 1.1   | 0.0 | 0.1    | 5.4              | 28.3             |     |
|           |            | QZ4P             | 3.0  | –   | 1.2   | 3.1  | 0.1 | 32.6      | 9.8      | 0.9   | 0.0               | 14.6 | 1.2   | 0.0 | 0.1    | 5.6              | 32.6             |     |
|           |            | BP86-D3(BJ) QZ4P | 3.2  | –   | 1.1   | 3.4  | 0.1 | 17.6      | 9.2      | 1.2   | 0.0               | 18.3 | 1.0   | 0.0 | 0.1    | 4.6              | 18.3             |     |

<sup>a</sup> AVG = total average percentage error; MAX = maximum percentage error.

**Table S11.** Errors in reaction barriers and reaction energies (kcal mol<sup>-1</sup>) for the various pericyclic reactions, computed with XC/QZ4P//CCSD(T)/cc-pVTZ, compared to CCSDT(Q)/CBS//CCSD(T)/cc-pVTZ.

| XC              | Diels-Alder Reaction |                         | 1,3-dipolar Cycloaddition |                         | Electrocyclic Rearrangement    |                         | Sigmatropic Rearrangement |                         | Double Group Transfer |                         |
|-----------------|----------------------|-------------------------|---------------------------|-------------------------|--------------------------------|-------------------------|---------------------------|-------------------------|-----------------------|-------------------------|
|                 | $\Delta E^\ddagger$  | $\Delta E_{\text{rxn}}$ | $\Delta E^\ddagger$       | $\Delta E_{\text{rxn}}$ | $\Delta E^\ddagger$            | $\Delta E_{\text{rxn}}$ | $\Delta E^\ddagger$       | $\Delta E_{\text{rxn}}$ | $\Delta E^\ddagger$   | $\Delta E_{\text{rxn}}$ |
| VWN             | -20.1                | -17.8                   | -15.8                     | -13.4                   | <i>LDA</i>                     |                         | -15.1                     | 0.0                     | -28.3                 | 0.0                     |
|                 |                      |                         |                           |                         | <i>GGAs</i>                    |                         |                           |                         |                       |                         |
| BP86            | -4.9                 | 5.4                     | -2.7                      | 8.5                     | -3.9                           | -0.3                    | -8.7                      | 0.0                     | -12.1                 | 0.0                     |
| BLYP            | 1.7                  | 17.6                    | 1.5                       | 18.3                    | -0.8                           | 5.3                     | -5.1                      | 0.0                     | -4.9                  | 0.0                     |
| BEE             | -3.9                 | 4.6                     | -0.9                      | 9.3                     | -4.6                           | -2.3                    | -8.9                      | 0.0                     | -11.8                 | 0.0                     |
| PW91            | -7.6                 | 1.4                     | -4.9                      | 5.1                     | -4.2                           | -1.2                    | -9.2                      | 0.0                     | -14.5                 | 0.0                     |
| PBE             | -7.2                 | 1.3                     | -4.3                      | 5.5                     | -4.5                           | -1.9                    | -9.4                      | 0.0                     | -14.4                 | 0.0                     |
| PBEsol          | -13.8                | -9.4                    | -9.8                      | -4.6                    | -6.8                           | -5.3                    | -13.0                     | 0.0                     | -21.9                 | 0.0                     |
| RPBE            | -0.9                 | 9.6                     | 1.2                       | 13.6                    | -3.6                           | -0.4                    | -7.1                      | 0.0                     | -8.5                  | 0.0                     |
| revPBE          | -1.3                 | 8.8                     | 1.1                       | 13.0                    | -3.8                           | -0.7                    | -7.5                      | 0.0                     | -9.0                  | 0.0                     |
| mPBE            | -5.5                 | 3.6                     | -2.8                      | 7.7                     | -4.2                           | -1.4                    | -8.7                      | 0.0                     | -12.8                 | 0.0                     |
| mPW             | -4.4                 | 5.8                     | -2.0                      | 9.5                     | -3.6                           | -0.3                    | -8.1                      | 0.0                     | -11.3                 | 0.0                     |
| HTBS            | -6.4                 | 0.4                     | -2.8                      | 5.2                     | -6.0                           | -3.9                    | -10.9                     | 0.0                     | -14.7                 | 0.0                     |
| OLYP            | 4.2                  | 11.6                    | 6.0                       | 15.7                    | -3.1                           | -1.5                    | -6.2                      | 0.0                     | -4.9                  | 0.0                     |
| OPBE            | -1.1                 | -1.1                    | 3.7                       | 6.8                     | -6.8                           | -8.6                    | -10.1                     | 0.0                     | -11.4                 | 0.0                     |
| XLYP            | 2.1                  | 18.8                    | 1.6                       | 19.2                    | -0.4                           | 6.1                     | -4.4                      | 0.0                     | -4.1                  | 0.0                     |
|                 |                      |                         |                           |                         | <i>Meta-GGAs</i>               |                         |                           |                         |                       |                         |
| M06-L           | -2.4                 | 1.5                     | 2.4                       | 12.0                    | 0.2                            | -2.6                    | -2.9                      | 0.0                     | -4.3                  | 0.0                     |
| MVS             | -7.4                 | -6.9                    | 0.2                       | 4.1                     | -0.7                           | -2.6                    | -8.6                      | 0.0                     | -13.6                 | 0.0                     |
| TPSS            | -4.2                 | 7.4                     | -2.1                      | 9.4                     | -3.3                           | -0.7                    | -6.0                      | 0.0                     | -7.2                  | 0.0                     |
| revTPSS         | -5.2                 | 5.3                     | -3.1                      | 6.2                     | -3.8                           | -2.4                    | -5.4                      | 0.0                     | -5.3                  | 0.0                     |
|                 |                      |                         |                           |                         | <i>Hybrids</i>                 |                         |                           |                         |                       |                         |
| B3LYP           | 3.2                  | 10.1                    | 3.7                       | 10.3                    | 1.4                            | 3.3                     | -1.8                      | 0.0                     | -0.6                  | 0.0                     |
| B3LYP*          | 1.2                  | 9.4                     | 1.8                       | 9.9                     | 0.3                            | 3.0                     | -3.4                      | 0.0                     | -3.5                  | 0.0                     |
| B1LYP           | 4.7                  | 10.4                    | 5.0                       | 9.9                     | 2.2                            | 3.6                     | -0.4                      | 0.0                     | 1.8                   | 0.0                     |
| B1PW91          | -0.3                 | -1.1                    | 2.9                       | 2.2                     | -1.0                           | -2.8                    | -3.8                      | 0.0                     | -4.1                  | 0.0                     |
| BHandH          | -7.3                 | -19.1                   | -4.1                      | -19.5                   | 0.8                            | -4.9                    | -2.7                      | 0.0                     | -7.8                  | 0.0                     |
| BHandHLYP       | 7.6                  | 3.1                     | 8.3                       | 1.1                     | 5.2                            | 1.9                     | 4.4                       | 0.0                     | 8.3                   | 0.0                     |
| KMLYP           | -0.6                 | -12.9                   | 2.2                       | -13.5                   | 3.1                            | -3.4                    | 1.2                       | 0.0                     | -0.1                  | 0.0                     |
| O3LYP           | -22.9                | -28.5                   | -17.9                     | -24.6                   | -6.1                           | -8.3                    | -14.1                     | 0.0                     | -28.7                 | 0.0                     |
| OPBE0           | 0.9                  | -7.0                    | 5.9                       | -0.9                    | -3.4                           | -8.8                    | -5.3                      | 0.0                     | -5.1                  | 0.0                     |
| PBE0            | -3.5                 | -5.2                    | -0.1                      | -1.9                    | -1.6                           | -3.7                    | -4.7                      | 0.0                     | -7.3                  | 0.0                     |
| mPW1PW          | -1.2                 | -1.5                    | 1.8                       | 1.4                     | -0.8                           | -2.3                    | -3.6                      | 0.0                     | -4.6                  | 0.0                     |
| mPW1K           | 1.0                  | -6.6                    | 4.4                       | -4.7                    | 1.2                            | -3.8                    | -0.3                      | 0.0                     | 0.0                   | 0.0                     |
| S12H            | -3.4                 | -5.8                    | 1.0                       | -0.2                    | -0.7                           | -4.0                    | -2.8                      | 0.0                     | -6.2                  | 0.0                     |
| X3LYP           | 2.4                  | 8.5                     | 3.0                       | 8.4                     | 1.4                            | 3.1                     | -1.7                      | 0.0                     | -1.0                  | 0.0                     |
|                 |                      |                         |                           |                         | <i>Meta-Hybrids</i>            |                         |                           |                         |                       |                         |
| M06             | -0.1                 | -0.3                    | 4.4                       | 6.2                     | 0.1                            | -1.5                    | -1.9                      | 0.0                     | -1.8                  | 0.0                     |
| M06-2X          | -1.8                 | -1.2                    | 2.4                       | -0.8                    | 1.1                            | -0.5                    | -0.2                      | 0.0                     | -1.2                  | 0.0                     |
| M06-HF          | -5.8                 | -0.8                    | -1.2                      | -11.8                   | -0.5                           | 1.1                     | 0.9                       | 0.0                     | 0.5                   | 0.0                     |
| TPSSH           | -2.9                 | 4.4                     | -0.5                      | 6.3                     | -2.2                           | -1.7                    | -4.4                      | 0.0                     | -5.0                  | 0.0                     |
|                 |                      |                         |                           |                         | <i>Double-Hybrids</i>          |                         |                           |                         |                       |                         |
| B2K-PLYP        | -3.6                 | -1.6                    | -0.7                      | 3.1                     | 0.7                            | 0.1                     | 0.6                       | 0.0                     | -1.0                  | 0.0                     |
| B2T-PLYP        | -1.9                 | 2.1                     | 0.2                       | 5.7                     | 0.7                            | 1.1                     | -0.1                      | 0.0                     | -1.0                  | 0.0                     |
| B2-PLYP         | -1.7                 | 3.8                     | 0.1                       | 7.7                     | 0.3                            | 1.6                     | -0.9                      | 0.0                     | -1.7                  | 0.0                     |
| LS1-TPSS        | -9.0                 | -9.1                    | -3.9                      | -1.4                    | -1.5                           | -3.7                    | -0.5                      | 0.0                     | -4.6                  | 0.0                     |
| mPW2K-PLYP      | -3.9                 | -1.8                    | -1.1                      | 2.8                     | 0.7                            | 0.3                     | 0.7                       | 0.0                     | -1.1                  | 0.0                     |
| mPW2-PLYP       | -1.2                 | 2.9                     | 0.5                       | 5.8                     | 1.2                            | 1.8                     | 0.1                       | 0.0                     | -0.6                  | 0.0                     |
| PBE0-DH         | -3.7                 | -9.2                    | 0.4                       | -4.9                    | -0.6                           | -4.5                    | -2.0                      | 0.0                     | -4.3                  | 0.0                     |
| revDSD-BLYP     | -4.4                 | -1.7                    | -1.5                      | 3.1                     | 0.9                            | 0.6                     | 1.5                       | 0.0                     | -0.5                  | 0.0                     |
| revDSD-PBE      | -5.1                 | -4.5                    | -1.5                      | 1.5                     | -0.3                           | -1.8                    | 0.5                       | 0.0                     | -2.4                  | 0.0                     |
| revDSD-PBEP86   | -2.8                 | -1.8                    | 0.3                       | 3.7                     | 0.5                            | -0.9                    | 1.6                       | 0.0                     | -0.2                  | 0.0                     |
|                 |                      |                         |                           |                         | <i>Range-Separated Hybrids</i> |                         |                           |                         |                       |                         |
| CAM-B3LYP       | 4.1                  | 2.3                     | 3.8                       | 1.1                     | 2.6                            | 0.8                     | 0.5                       | 0.0                     | 1.5                   | 0.0                     |
| CAMY-B3LYP      | 2.1                  | 3.2                     | 2.4                       | 2.6                     | 1.9                            | 1.5                     | -0.7                      | 0.0                     | -0.5                  | 0.0                     |
| $\omega$ B97    | 4.1                  | -8.5                    | 4.3                       | -6.3                    | 3.1                            | -5.3                    | 3.6                       | 0.0                     | 2.8                   | 0.0                     |
| $\omega$ B97X   | 3.4                  | -4.7                    | 3.9                       | -3.4                    | 2.6                            | -3.1                    | 2.0                       | 0.0                     | 1.5                   | 0.0                     |
| $\omega$ B97X-D | 3.5                  | -0.1                    | 4.7                       | 1.0                     | 1.3                            | -2.2                    | -0.4                      | 0.0                     | 0.0                   | 0.0                     |

**Table S11** (continued).

| XC           | Diels-Alder<br>Reaction     |                         | 1,3-dipolar<br>Cycloaddition |                         | Electrocyclic<br>Rearrangement |                         | Sigmatropic<br>Rearrangement |                         | Double Group<br>Transfer |                         |
|--------------|-----------------------------|-------------------------|------------------------------|-------------------------|--------------------------------|-------------------------|------------------------------|-------------------------|--------------------------|-------------------------|
|              | $\Delta E^\ddagger$         | $\Delta E_{\text{rxn}}$ | $\Delta E^\ddagger$          | $\Delta E_{\text{rxn}}$ | $\Delta E^\ddagger$            | $\Delta E_{\text{rxn}}$ | $\Delta E^\ddagger$          | $\Delta E_{\text{rxn}}$ | $\Delta E^\ddagger$      | $\Delta E_{\text{rxn}}$ |
|              | <i>Dispersion-Corrected</i> |                         |                              |                         |                                |                         |                              |                         |                          |                         |
| BP86-D3(BJ)  | -11.2                       | 0.4                     | -7.1                         | 4.5                     | -4.1                           | 0.0                     | -9.2                         | 0.0                     | -15.5                    | 0.0                     |
| BLYP-D3(BJ)  | -6.4                        | 11.2                    | -4.2                         | 13.0                    | -1.2                           | 5.4                     | -5.8                         | 0.0                     | -9.2                     | 0.0                     |
| PBE-D3(BJ)   | -11.2                       | -1.9                    | -7.2                         | 2.9                     | -4.7                           | -1.8                    | -9.7                         | 0.0                     | -16.7                    | 0.0                     |
| OLYP-D3(BJ)  | -12.8                       | -2.9                    | -6.4                         | 3.1                     | -4.5                           | -1.7                    | -9.4                         | 0.0                     | -14.1                    | 0.0                     |
| OPBE-D3(BJ)  | -17.9                       | -15.0                   | -8.4                         | -5.2                    | -8.0                           | -8.6                    | -12.8                        | 0.0                     | -20.5                    | 0.0                     |
| B3LYP-D3(BJ) | -3.4                        | 4.9                     | -1.0                         | 6.0                     | 1.0                            | 3.4                     | -2.4                         | 0.0                     | -4.2                     | 0.0                     |
| PBE0-D3(BJ)  | -7.0                        | -7.9                    | -2.6                         | -4.2                    | -1.7                           | -3.6                    | -5.0                         | 0.0                     | -9.3                     | 0.0                     |
| M06-2X-D3    | -2.0                        | -1.3                    | 2.3                          | -0.8                    | 1.1                            | -0.5                    | -0.2                         | 0.0                     | -1.3                     | 0.0                     |

**Table S12.** Reaction barriers and reaction energies (kcal mol<sup>-1</sup>) for the various pericyclic reactions, computed at DFT level using Method/BS, where Method = BP86, BP86-D3(BJ) and BS = DZ, DZP, TZ2P, QZ4P.

| Method/BS        | Diels-Alder Reaction |                         | 1,3-dipolar Cycloaddition |                         | Electrocyclic rearrangement |                         | Sigmatropic rearrangement |                         | Double Group Transfer |                         |
|------------------|----------------------|-------------------------|---------------------------|-------------------------|-----------------------------|-------------------------|---------------------------|-------------------------|-----------------------|-------------------------|
|                  | $\Delta E^\ddagger$  | $\Delta E_{\text{rxn}}$ | $\Delta E^\ddagger$       | $\Delta E_{\text{rxn}}$ | $\Delta E^\ddagger$         | $\Delta E_{\text{rxn}}$ | $\Delta E^\ddagger$       | $\Delta E_{\text{rxn}}$ | $\Delta E^\ddagger$   | $\Delta E_{\text{rxn}}$ |
| BP86/DZ          | 12.8                 | -42.3                   | 6.1                       | -22.5                   | 41.7                        | 14.0                    | 30.8                      | 0.0                     | 39.4                  | 0.0                     |
| BP86/DZP         | 13.3                 | -42.4                   | 12.4                      | -20.9                   | 39.9                        | 10.0                    | 28.8                      | 0.0                     | 38.0                  | 0.0                     |
| BP86/TZ2P        | 15.2                 | -41.6                   | 15.5                      | -20.1                   | 39.9                        | 8.8                     | 28.2                      | 0.0                     | 38.1                  | 0.0                     |
| BP86/QZ4P        | 15.0                 | -42.4                   | 15.4                      | -20.8                   | 39.6                        | 8.3                     | 28.2                      | 0.0                     | 38.2                  | 0.0                     |
| BP86-D3(BJ)/QZ4P | 8.8                  | -47.2                   | 11.2                      | -24.7                   | 39.4                        | 8.4                     | 27.7                      | 0.0                     | 33.7                  | 0.0                     |

**Table S13.** Reaction barriers and reaction energies (kcal mol<sup>-1</sup>) for the various pericyclic reactions, computed with XC/TZ2P//CCSD(T)/cc-pVTZ.

| XC              | Diels-Alder Reaction           |                         | 1,3-dipolar Cycloaddition |                         | Electrocyclic Rearrangement |                         | Sigmatropic Rearrangement |                         | Double Group Transfer |                         |
|-----------------|--------------------------------|-------------------------|---------------------------|-------------------------|-----------------------------|-------------------------|---------------------------|-------------------------|-----------------------|-------------------------|
|                 | $\Delta E^\ddagger$            | $\Delta E_{\text{rxn}}$ | $\Delta E^\ddagger$       | $\Delta E_{\text{rxn}}$ | $\Delta E^\ddagger$         | $\Delta E_{\text{rxn}}$ | $\Delta E^\ddagger$       | $\Delta E_{\text{rxn}}$ | $\Delta E^\ddagger$   | $\Delta E_{\text{rxn}}$ |
|                 | <i>LDA</i>                     |                         |                           |                         |                             |                         |                           |                         |                       |                         |
| VWN             | -0.2                           | -64.8                   | 2.7                       | -41.6                   | 36.6                        | 2.9                     | 21.7                      | 0.0                     | 21.8                  | 0.0                     |
|                 | <i>GGAs</i>                    |                         |                           |                         |                             |                         |                           |                         |                       |                         |
| BP86            | 14.9                           | -41.7                   | 15.7                      | -19.8                   | 39.8                        | 8.7                     | 28.1                      | 0.0                     | 38.1                  | 0.0                     |
| BLYP            | 21.5                           | -29.6                   | 19.9                      | -10.2                   | 42.8                        | 14.2                    | 31.8                      | 0.0                     | 45.3                  | 0.0                     |
| BEE             | 16.0                           | -42.3                   | 17.6                      | -18.7                   | 39.2                        | 7.0                     | 27.9                      | 0.0                     | 38.4                  | 0.0                     |
| PW91            | 12.2                           | -45.6                   | 13.5                      | -23.1                   | 39.5                        | 7.9                     | 27.7                      | 0.0                     | 35.8                  | 0.0                     |
| PBE             | 12.6                           | -45.7                   | 14.1                      | -22.7                   | 39.2                        | 7.3                     | 27.5                      | 0.0                     | 35.8                  | 0.0                     |
| PBEsol          | 6.0                            | -56.4                   | 8.7                       | -32.7                   | 37.0                        | 3.8                     | 23.8                      | 0.0                     | 28.3                  | 0.0                     |
| RPBE            | 18.9                           | -37.3                   | 19.7                      | -14.5                   | 40.3                        | 8.8                     | 29.8                      | 0.0                     | 41.9                  | 0.0                     |
| revPBE          | 18.5                           | -38.1                   | 19.5                      | -15.1                   | 40.0                        | 8.4                     | 29.3                      | 0.0                     | 41.3                  | 0.0                     |
| mPBE            | 14.3                           | -43.3                   | 15.6                      | -20.5                   | 39.6                        | 7.8                     | 28.1                      | 0.0                     | 37.4                  | 0.0                     |
| mPW             | 15.5                           | -41.3                   | 16.5                      | -18.7                   | 40.1                        | 8.8                     | 28.7                      | 0.0                     | 39.0                  | 0.0                     |
| HTBS            | 13.5                           | -46.4                   | 15.8                      | -22.7                   | 37.8                        | 5.3                     | 26.0                      | 0.0                     | 35.5                  | 0.0                     |
| OLYP            | 24.0                           | -35.2                   | 24.6                      | -12.3                   | 40.8                        | 7.8                     | 30.7                      | 0.0                     | 45.5                  | 0.0                     |
| OPBE            | 18.8                           | -47.6                   | 22.4                      | -20.7                   | 37.3                        | 1.1                     | 26.8                      | 0.0                     | 38.9                  | 0.0                     |
| XLYP            | 21.6                           | -28.3                   | 19.9                      | -9.3                    | 43.3                        | 15.0                    | 32.4                      | 0.0                     | 46.1                  | 0.0                     |
|                 | <i>Meta-GGAs</i>               |                         |                           |                         |                             |                         |                           |                         |                       |                         |
| M06-L           | 17.1                           | -45.1                   | 20.4                      | -16.5                   | 43.8                        | 6.9                     | 34.1                      | 0.0                     | 46.0                  | 0.0                     |
| MVS             | 11.6                           | -54.6                   | 17.9                      | -24.9                   | 43.1                        | 6.5                     | 28.1                      | 0.0                     | 36.5                  | 0.0                     |
| TPSS            | 15.6                           | -39.6                   | 16.3                      | -18.8                   | 40.5                        | 8.4                     | 30.8                      | 0.0                     | 43.0                  | 0.0                     |
| revTPSS         | 14.5                           | -41.8                   | 15.3                      | -22.1                   | 40.0                        | 6.9                     | 31.3                      | 0.0                     | 44.9                  | 0.0                     |
|                 | <i>Hybrids</i>                 |                         |                           |                         |                             |                         |                           |                         |                       |                         |
| B3LYP           | 22.8                           | -37.3                   | 22.0                      | -18.3                   | 45.0                        | 12.1                    | 35.0                      | 0.0                     | 49.5                  | 0.0                     |
| B3LYP*          | 20.8                           | -37.9                   | 20.1                      | -18.6                   | 44.0                        | 11.8                    | 33.4                      | 0.0                     | 46.7                  | 0.0                     |
| B1LYP           | 24.3                           | -37.1                   | 23.2                      | -18.8                   | 45.9                        | 12.4                    | 36.3                      | 0.0                     | 51.8                  | 0.0                     |
| B1PW91          | 19.3                           | -48.3                   | 21.1                      | -26.2                   | 42.7                        | 6.2                     | 32.9                      | 0.0                     | 45.9                  | 0.0                     |
| BHandH          | 12.1                           | -66.9                   | 14.0                      | -48.2                   | 44.5                        | 3.9                     | 34.0                      | 0.0                     | 42.2                  | 0.0                     |
| BHandHLYP       | 26.9                           | -44.7                   | 26.3                      | -27.7                   | 48.8                        | 10.6                    | 41.1                      | 0.0                     | 58.3                  | 0.0                     |
| KMLYP           | 18.6                           | -60.8                   | 20.2                      | -42.3                   | 46.8                        | 5.4                     | 37.8                      | 0.0                     | 49.9                  | 0.0                     |
| O3LYP           | -3.2                           | -75.8                   | 0.4                       | -52.9                   | 37.6                        | 0.7                     | 22.6                      | 0.0                     | 21.4                  | 0.0                     |
| OPBE0           | 20.6                           | -53.9                   | 24.4                      | -28.8                   | 40.6                        | 0.6                     | 31.5                      | 0.0                     | 45.1                  | 0.0                     |
| PBE0            | 16.1                           | -52.4                   | 18.2                      | -30.3                   | 42.2                        | 5.4                     | 32.0                      | 0.0                     | 42.8                  | 0.0                     |
| mPW1PW          | 18.4                           | -48.8                   | 20.1                      | -27.1                   | 43.0                        | 6.7                     | 33.1                      | 0.0                     | 45.5                  | 0.0                     |
| mPW1K           | 20.4                           | -54.2                   | 22.6                      | -33.2                   | 44.9                        | 5.2                     | 36.4                      | 0.0                     | 50.0                  | 0.0                     |
| S12H            | 16.2                           | -52.7                   | 19.2                      | -28.4                   | 43.1                        | 5.3                     | 34.0                      | 0.0                     | 44.1                  | 0.0                     |
| X3LYP           | 22.0                           | -38.9                   | 21.2                      | -20.2                   | 45.1                        | 11.9                    | 35.1                      | 0.0                     | 49.1                  | 0.0                     |
|                 | <i>Meta-Hybrids</i>            |                         |                           |                         |                             |                         |                           |                         |                       |                         |
| M06             | 19.5                           | -47.7                   | 22.6                      | -22.3                   | 43.7                        | 7.4                     | 34.9                      | 0.0                     | 48.3                  | 0.0                     |
| M06-2X          | 17.5                           | -49.2                   | 20.5                      | -29.8                   | 44.7                        | 8.2                     | 36.4                      | 0.0                     | 48.7                  | 0.0                     |
| M06-HF          | 14.3                           | -49.0                   | 17.7                      | -41.1                   | 43.1                        | 9.4                     | 37.7                      | 0.0                     | 50.9                  | 0.0                     |
| TPSSH           | 16.8                           | -42.7                   | 17.9                      | -22.0                   | 41.6                        | 7.6                     | 32.4                      | 0.0                     | 45.2                  | 0.0                     |
|                 | <i>Double-Hybrids</i>          |                         |                           |                         |                             |                         |                           |                         |                       |                         |
| B2K-PLYP        | 18.1                           | -49.0                   | 18.4                      | -25.4                   | 44.9                        | 9.1                     | 35.7                      | 0.0                     | 48.9                  | 0.0                     |
| B2T-PLYP        | 19.2                           | -45.7                   | 19.1                      | -22.9                   | 44.8                        | 10.0                    | 35.4                      | 0.0                     | 48.9                  | 0.0                     |
| B2-PLYP         | 19.2                           | -43.6                   | 19.0                      | -20.9                   | 44.4                        | 10.5                    | 34.8                      | 0.0                     | 48.2                  | 0.0                     |
| LS1-TPSS        | 13.8                           | -56.2                   | 15.7                      | -29.7                   | 43.1                        | 5.6                     | 33.8                      | 0.0                     | 45.2                  | 0.0                     |
| mPW2K-PLYP      | 17.8                           | -49.1                   | 18.0                      | -25.7                   | 45.0                        | 9.2                     | 35.8                      | 0.0                     | 48.7                  | 0.0                     |
| mPW2-PLYP       | 19.6                           | -44.7                   | 19.3                      | -22.8                   | 45.2                        | 10.7                    | 35.8                      | 0.0                     | 49.4                  | 0.0                     |
| PBE0-DH         | 16.5                           | -56.7                   | 18.9                      | -33.5                   | 43.3                        | 4.5                     | 34.1                      | 0.0                     | 45.7                  | 0.0                     |
| revDSD-BLYP     | 17.1                           | -49.5                   | 17.5                      | -25.9                   | 45.1                        | 9.4                     | 36.7                      | 0.0                     | 49.1                  | 0.0                     |
| revDSD-PBE      | 16.3                           | -52.4                   | 17.3                      | -27.5                   | 43.9                        | 7.2                     | 35.9                      | 0.0                     | 47.1                  | 0.0                     |
| revDSD-PBEP86   | 18.6                           | -49.7                   | 19.1                      | -25.3                   | 44.7                        | 8.1                     | 36.9                      | 0.0                     | 49.3                  | 0.0                     |
|                 | <i>Range-Separated Hybrids</i> |                         |                           |                         |                             |                         |                           |                         |                       |                         |
| CAM-B3LYP       | 23.6                           | -45.3                   | 21.9                      | -27.6                   | 46.2                        | 9.6                     | 37.2                      | 0.0                     | 51.5                  | 0.0                     |
| CAMY-B3LYP      | 21.6                           | -44.3                   | 20.5                      | -26.1                   | 45.6                        | 10.3                    | 36.0                      | 0.0                     | 49.6                  | 0.0                     |
| $\omega$ B97    | 23.5                           | -55.6                   | 22.4                      | -34.8                   | 46.8                        | 4.1                     | 40.4                      | 0.0                     | 53.1                  | 0.0                     |
| $\omega$ B97X   | 22.8                           | -52.0                   | 21.9                      | -32.0                   | 46.3                        | 6.1                     | 38.8                      | 0.0                     | 51.6                  | 0.0                     |
| $\omega$ B97X-D | 23.0                           | -47.6                   | 22.8                      | -27.6                   | 45.0                        | 6.7                     | 36.4                      | 0.0                     | 50.2                  | 0.0                     |

**Table S13** (continued).

| XC           | Diels-Alder Reaction        |                         | 1,3-dipolar Cycloaddition |                         | Electrocyclic Rearrangement |                         | Sigmatropic Rearrangement |                         | Double Group Transfer |                         |
|--------------|-----------------------------|-------------------------|---------------------------|-------------------------|-----------------------------|-------------------------|---------------------------|-------------------------|-----------------------|-------------------------|
|              | $\Delta E^\ddagger$         | $\Delta E_{\text{rxn}}$ | $\Delta E^\ddagger$       | $\Delta E_{\text{rxn}}$ | $\Delta E^\ddagger$         | $\Delta E_{\text{rxn}}$ | $\Delta E^\ddagger$       | $\Delta E_{\text{rxn}}$ | $\Delta E^\ddagger$   | $\Delta E_{\text{rxn}}$ |
|              | <i>Dispersion-Corrected</i> |                         |                           |                         |                             |                         |                           |                         |                       |                         |
| BP86-D3(BJ)  | 8.7                         | -46.6                   | 11.2                      | -23.8                   | 39.6                        | 8.9                     | 27.6                      | 0.0                     | 34.7                  | 0.0                     |
| BLYP-D3(BJ)  | 13.4                        | -36.0                   | 14.1                      | -15.5                   | 42.4                        | 14.3                    | 31.0                      | 0.0                     | 41.0                  | 0.0                     |
| PBE-D3(BJ)   | 8.6                         | -48.8                   | 11.3                      | -25.3                   | 39.1                        | 7.4                     | 27.1                      | 0.0                     | 33.6                  | 0.0                     |
| OLYP-D3(BJ)  | 7.0                         | -49.6                   | 12.1                      | -24.9                   | 39.5                        | 7.7                     | 27.6                      | 0.0                     | 36.2                  | 0.0                     |
| OPBE-D3(BJ)  | 2.1                         | -61.5                   | 10.3                      | -32.7                   | 36.1                        | 1.0                     | 24.1                      | 0.0                     | 29.9                  | 0.0                     |
| B3LYP-D3(BJ) | 16.2                        | -42.5                   | 17.3                      | -22.6                   | 44.7                        | 12.2                    | 34.4                      | 0.0                     | 45.9                  | 0.0                     |
| PBE0-D3(BJ)  | 12.5                        | -55.2                   | 15.7                      | -32.5                   | 42.1                        | 5.5                     | 31.8                      | 0.0                     | 40.9                  | 0.0                     |
| M06-2X-D3    | 17.4                        | -49.3                   | 20.4                      | -29.9                   | 44.7                        | 8.2                     | 36.4                      | 0.0                     | 48.6                  | 0.0                     |

**Table S14.** Errors in reaction barriers and reaction energies (kcal mol<sup>-1</sup>) for the various pericyclic reactions, computed with XC/TZ2P//CCSD(T)/cc-pVTZ, compared to CCSDT(Q)/CBS//CCSD(T)/cc-pVTZ.

| XC              | Diels-Alder Reaction           |                         | 1,3-dipolar Cycloaddition |                         | Electrocyclic Rearrangement |                         | Sigmatropic Rearrangement |                         | Double Group Transfer |                         |
|-----------------|--------------------------------|-------------------------|---------------------------|-------------------------|-----------------------------|-------------------------|---------------------------|-------------------------|-----------------------|-------------------------|
|                 | $\Delta E^\ddagger$            | $\Delta E_{\text{rxn}}$ | $\Delta E^\ddagger$       | $\Delta E_{\text{rxn}}$ | $\Delta E^\ddagger$         | $\Delta E_{\text{rxn}}$ | $\Delta E^\ddagger$       | $\Delta E_{\text{rxn}}$ | $\Delta E^\ddagger$   | $\Delta E_{\text{rxn}}$ |
|                 | <i>LDA</i>                     |                         |                           |                         |                             |                         |                           |                         |                       |                         |
| VWN             | -19.8                          | -17.2                   | -15.6                     | -12.7                   | -6.8                        | -5.6                    | -15.1                     | 0.0                     | -28.4                 | 0.0                     |
|                 | <i>GGAs</i>                    |                         |                           |                         |                             |                         |                           |                         |                       |                         |
| BP86            | -4.7                           | 6.0                     | -2.6                      | 9.1                     | -3.6                        | 0.3                     | -8.7                      | 0.0                     | -12.1                 | 0.0                     |
| BLYP            | 1.9                            | 18.1                    | 1.6                       | 18.7                    | -0.6                        | 5.8                     | -5.0                      | 0.0                     | -4.9                  | 0.0                     |
| BEE             | -3.6                           | 5.4                     | -0.7                      | 10.2                    | -4.2                        | -1.5                    | -8.9                      | 0.0                     | -11.8                 | 0.0                     |
| PW91            | -7.4                           | 2.1                     | -4.8                      | 5.8                     | -3.9                        | -0.5                    | -9.1                      | 0.0                     | -14.4                 | 0.0                     |
| PBE             | -7.0                           | 2.0                     | -4.2                      | 6.2                     | -4.2                        | -1.2                    | -9.3                      | 0.0                     | -14.4                 | 0.0                     |
| PBESol          | -13.6                          | -8.8                    | -9.6                      | -3.8                    | -6.4                        | -4.7                    | -13.0                     | 0.0                     | -21.9                 | 0.0                     |
| RPBE            | -0.7                           | 10.4                    | 1.4                       | 14.4                    | -3.1                        | 0.4                     | -7.0                      | 0.0                     | -8.3                  | 0.0                     |
| revPBE          | -1.1                           | 9.6                     | 1.2                       | 13.8                    | -3.4                        | 0.0                     | -7.5                      | 0.0                     | -8.9                  | 0.0                     |
| mPBE            | -5.3                           | 4.4                     | -2.7                      | 8.4                     | -3.8                        | -0.6                    | -8.7                      | 0.0                     | -12.8                 | 0.0                     |
| mPW             | -4.1                           | 6.4                     | -1.8                      | 10.2                    | -3.3                        | 0.4                     | -8.1                      | 0.0                     | -11.2                 | 0.0                     |
| HTBS            | -6.1                           | 1.3                     | -2.5                      | 6.2                     | -5.6                        | -3.2                    | -10.8                     | 0.0                     | -14.7                 | 0.0                     |
| OLYP            | 4.4                            | 12.5                    | 6.3                       | 16.6                    | -2.6                        | -0.6                    | -6.1                      | 0.0                     | -4.7                  | 0.0                     |
| OPBE            | -0.8                           | 0.0                     | 4.1                       | 8.2                     | -6.1                        | -7.4                    | -10.0                     | 0.0                     | -11.3                 | 0.0                     |
| XLYP            | 2.0                            | 19.4                    | 1.6                       | 19.6                    | -0.1                        | 6.6                     | -4.4                      | 0.0                     | -4.1                  | 0.0                     |
|                 | <i>Meta-GGAs</i>               |                         |                           |                         |                             |                         |                           |                         |                       |                         |
| M06-L           | -2.5                           | 2.6                     | 2.1                       | 12.4                    | 0.4                         | -1.6                    | -2.7                      | 0.0                     | -4.2                  | 0.0                     |
| MVS             | -8.0                           | -7.0                    | -0.4                      | 4.0                     | -0.3                        | -2.0                    | -8.7                      | 0.0                     | -13.7                 | 0.0                     |
| TPSS            | -4.0                           | 8.1                     | -2.0                      | 10.1                    | -2.9                        | 0.0                     | -6.0                      | 0.0                     | -7.2                  | 0.0                     |
| revTPSS         | -5.1                           | 5.9                     | -3.0                      | 6.8                     | -3.4                        | -1.6                    | -5.5                      | 0.0                     | -5.3                  | 0.0                     |
|                 | <i>Hybrids</i>                 |                         |                           |                         |                             |                         |                           |                         |                       |                         |
| B3LYP           | 3.2                            | 10.4                    | 3.7                       | 10.6                    | 1.6                         | 3.7                     | -1.8                      | 0.0                     | -0.7                  | 0.0                     |
| B3LYP*          | 1.2                            | 9.8                     | 1.8                       | 10.3                    | 0.6                         | 3.4                     | -3.4                      | 0.0                     | -3.5                  | 0.0                     |
| B1LYP           | 4.7                            | 10.6                    | 4.9                       | 10.1                    | 2.5                         | 4.0                     | -0.5                      | 0.0                     | 1.6                   | 0.0                     |
| B1PW91          | -0.3                           | -0.6                    | 2.8                       | 2.7                     | -0.7                        | -2.3                    | -3.9                      | 0.0                     | -4.3                  | 0.0                     |
| BHandH          | -7.5                           | -19.3                   | -4.3                      | -19.3                   | 1.1                         | -4.6                    | -2.8                      | 0.0                     | -8.0                  | 0.0                     |
| BHandHLYP       | 7.3                            | 3.0                     | 8.0                       | 1.2                     | 5.4                         | 2.2                     | 4.3                       | 0.0                     | 8.1                   | 0.0                     |
| KMLYP           | -1.0                           | -13.2                   | 1.9                       | -13.4                   | 3.4                         | -3.1                    | 1.0                       | 0.0                     | -0.3                  | 0.0                     |
| O3LYP           | -22.8                          | -28.2                   | -17.9                     | -24.0                   | -5.8                        | -7.8                    | -14.2                     | 0.0                     | -28.8                 | 0.0                     |
| OPBE0           | 1.0                            | -6.3                    | 6.1                       | 0.1                     | -2.8                        | -7.9                    | -5.3                      | 0.0                     | -5.1                  | 0.0                     |
| PBE0            | -3.5                           | -4.8                    | -0.1                      | -1.4                    | -1.2                        | -3.1                    | -4.8                      | 0.0                     | -7.4                  | 0.0                     |
| mPW1PW          | -1.2                           | -1.2                    | 1.8                       | 1.8                     | -0.4                        | -1.8                    | -3.7                      | 0.0                     | -4.7                  | 0.0                     |
| mPW1K           | 0.8                            | -6.6                    | 4.3                       | -4.3                    | 1.5                         | -3.3                    | -0.4                      | 0.0                     | -0.2                  | 0.0                     |
| S12H            | -3.4                           | -5.1                    | 0.9                       | 0.5                     | -0.3                        | -3.2                    | -2.8                      | 0.0                     | -6.1                  | 0.0                     |
| X3LYP           | 2.4                            | 8.8                     | 2.9                       | 8.7                     | 1.7                         | 3.5                     | -1.7                      | 0.0                     | -1.1                  | 0.0                     |
|                 | <i>Meta-Hybrids</i>            |                         |                           |                         |                             |                         |                           |                         |                       |                         |
| M06             | -0.1                           | -0.1                    | 4.3                       | 6.6                     | 0.3                         | -1.1                    | -1.9                      | 0.0                     | -1.9                  | 0.0                     |
| M06-2X          | -2.1                           | -1.6                    | 2.2                       | -0.9                    | 1.3                         | -0.3                    | -0.4                      | 0.0                     | -1.5                  | 0.0                     |
| M06-HF          | -5.3                           | -1.4                    | -0.6                      | -12.2                   | -0.3                        | 1.0                     | 0.9                       | 0.0                     | 0.7                   | 0.0                     |
| TPSSH           | -2.8                           | 5.0                     | -0.4                      | 6.9                     | -1.8                        | -0.9                    | -4.4                      | 0.0                     | -5.0                  | 0.0                     |
|                 | <i>Double-Hybrids</i>          |                         |                           |                         |                             |                         |                           |                         |                       |                         |
| B2K-PLYP        | -1.5                           | -1.4                    | 0.1                       | 3.5                     | 1.5                         | 0.7                     | -1.1                      | 0.0                     | -1.3                  | 0.0                     |
| B2T-PLYP        | -0.4                           | 2.0                     | 0.8                       | 6.0                     | 1.4                         | 1.6                     | -1.4                      | 0.0                     | -1.3                  | 0.0                     |
| B2-PLYP         | -0.4                           | 4.1                     | 0.7                       | 8.0                     | 1.0                         | 2.1                     | -2.0                      | 0.0                     | -2.0                  | 0.0                     |
| LS1-TPSS        | -5.8                           | -8.6                    | -2.6                      | -0.8                    | -0.3                        | -2.9                    | -3.0                      | 0.0                     | -5.0                  | 0.0                     |
| mPW2K-PLYP      | -1.8                           | -1.5                    | -0.3                      | 3.2                     | 1.6                         | 0.8                     | -1.0                      | 0.0                     | -1.5                  | 0.0                     |
| mPW2-PLYP       | 0.0                            | 3.0                     | 1.0                       | 6.1                     | 1.8                         | 2.3                     | -1.0                      | 0.0                     | -0.8                  | 0.0                     |
| PBE0-DH         | -3.1                           | -9.1                    | 0.6                       | -4.6                    | -0.1                        | -4.0                    | -2.7                      | 0.0                     | -4.5                  | 0.0                     |
| revDSD-BLYP     | -2.5                           | -1.9                    | -0.8                      | 3.0                     | 1.7                         | 1.0                     | -0.1                      | 0.0                     | -1.1                  | 0.0                     |
| revDSD-PBE      | -3.3                           | -4.8                    | -1.0                      | 1.4                     | 0.5                         | -1.3                    | -0.9                      | 0.0                     | -3.1                  | 0.0                     |
| revDSD-PBEP86   | -1.0                           | -2.1                    | 0.8                       | 3.6                     | 1.3                         | -0.4                    | 0.1                       | 0.0                     | -0.9                  | 0.0                     |
|                 | <i>Range-Separated Hybrids</i> |                         |                           |                         |                             |                         |                           |                         |                       |                         |
| CAM-B3LYP       | 4.0                            | 2.4                     | 3.6                       | 1.3                     | 2.8                         | 1.2                     | 0.4                       | 0.0                     | 1.3                   | 0.0                     |
| CAMY-B3LYP      | 2.0                            | 3.4                     | 2.2                       | 2.8                     | 2.2                         | 1.9                     | -0.8                      | 0.0                     | -0.6                  | 0.0                     |
| $\omega$ B97    | 3.9                            | -8.0                    | 4.1                       | -5.9                    | 3.4                         | -4.4                    | 3.6                       | 0.0                     | 2.9                   | 0.0                     |
| $\omega$ B97X   | 3.2                            | -4.4                    | 3.6                       | -3.1                    | 2.9                         | -2.4                    | 2.0                       | 0.0                     | 1.4                   | 0.0                     |
| $\omega$ B97X-D | 3.4                            | 0.0                     | 4.5                       | 1.3                     | 1.6                         | -1.8                    | -0.4                      | 0.0                     | 0.0                   | 0.0                     |



**Table S14 (continued).**

| XC           | Diels-Alder Reaction        |                         | 1,3-dipolar Cycloaddition |                         | Electrocyclic Rearrangement |                         | Sigmatropic Rearrangement |                         | Double Group Transfer |                         |
|--------------|-----------------------------|-------------------------|---------------------------|-------------------------|-----------------------------|-------------------------|---------------------------|-------------------------|-----------------------|-------------------------|
|              | $\Delta E^\ddagger$         | $\Delta E_{\text{rxn}}$ | $\Delta E^\ddagger$       | $\Delta E_{\text{rxn}}$ | $\Delta E^\ddagger$         | $\Delta E_{\text{rxn}}$ | $\Delta E^\ddagger$       | $\Delta E_{\text{rxn}}$ | $\Delta E^\ddagger$   | $\Delta E_{\text{rxn}}$ |
|              | <i>Dispersion-Corrected</i> |                         |                           |                         |                             |                         |                           |                         |                       |                         |
| BP86-D3(BJ)  | -10.9                       | 1.1                     | -7.1                      | 5.1                     | -3.8                        | 0.5                     | -9.2                      | 0.0                     | -15.5                 | 0.0                     |
| BLYP-D3(BJ)  | -6.2                        | 11.7                    | -4.2                      | 13.4                    | -1.0                        | 5.9                     | -5.8                      | 0.0                     | -9.2                  | 0.0                     |
| PBE-D3(BJ)   | -11.0                       | -1.2                    | -7.0                      | 3.6                     | -4.3                        | -1.1                    | -9.7                      | 0.0                     | -16.6                 | 0.0                     |
| OLYP-D3(BJ)  | -12.6                       | -2.0                    | -6.2                      | 4.0                     | -3.9                        | -0.7                    | -9.2                      | 0.0                     | -14.0                 | 0.0                     |
| OPBE-D3(BJ)  | -17.5                       | -13.9                   | -8.0                      | -3.8                    | -7.3                        | -7.5                    | -12.7                     | 0.0                     | -20.3                 | 0.0                     |
| B3LYP-D3(BJ) | -3.4                        | 5.2                     | -1.0                      | 6.3                     | 1.3                         | 3.8                     | -2.4                      | 0.0                     | -4.3                  | 0.0                     |
| PBE0-D3(BJ)  | -7.1                        | -7.6                    | -2.6                      | -3.6                    | -1.3                        | -3.0                    | -5.0                      | 0.0                     | -9.3                  | 0.0                     |
| M06-2X-D3    | -2.2                        | -1.7                    | 2.1                       | -1.0                    | 1.3                         | -0.3                    | -0.4                      | 0.0                     | -1.6                  | 0.0                     |

**Table S15.** Mean error (ME), mean absolute error (MAE), maximum unsigned error (MUE) and standard deviation (SD) of reaction barriers and energies (kcal mol<sup>-1</sup>) for the various pericyclic reactions, computed with XC/TZ2P//CCSD(T)/cc-pVTZ compared to CCSDT(Q)/CBS//CCSD(T)/cc-pVTZ.

| XC              | $\Delta E^\ddagger$ |      |      |     | $\Delta E_{\text{rxn}}$        |      |      |     | Total |      |      |     |
|-----------------|---------------------|------|------|-----|--------------------------------|------|------|-----|-------|------|------|-----|
|                 | ME                  | MAE  | MUE  | SD  | ME                             | MAE  | MUE  | SD  | ME    | MAE  | MUE  | SD  |
| VWN             | -17.1               | 17.1 | 28.4 | 7.0 | -11.8                          | 11.8 | 17.2 | 4.8 | -15.1 | 15.1 | 28.4 | 6.8 |
|                 |                     |      |      |     | <i>LDA</i>                     |      |      |     |       |      |      |     |
|                 |                     |      |      |     | <i>GGAs</i>                    |      |      |     |       |      |      |     |
| BP86            | -6.3                | 6.3  | 12.1 | 3.6 | 5.1                            | 5.1  | 9.1  | 3.6 | -2.1  | 5.9  | 12.1 | 3.6 |
| BLYP            | -1.4                | 2.8  | 5.0  | 1.8 | 14.2                           | 14.2 | 18.7 | 5.9 | 4.4   | 7.1  | 18.7 | 6.7 |
| BEE             | -5.8                | 5.8  | 11.8 | 4.0 | 4.7                            | 5.7  | 10.2 | 3.6 | -1.9  | 5.8  | 11.8 | 3.8 |
| PW91            | -7.9                | 7.9  | 14.4 | 3.7 | 2.4                            | 2.8  | 5.8  | 2.2 | -4.0  | 6.0  | 14.4 | 4.1 |
| PBE             | -7.8                | 7.8  | 14.4 | 3.8 | 2.3                            | 3.1  | 6.2  | 2.2 | -4.0  | 6.0  | 14.4 | 4.0 |
| PBEsol          | -12.9               | 12.9 | 21.9 | 5.2 | -5.7                           | 5.7  | 8.8  | 2.1 | -10.2 | 10.2 | 21.9 | 5.5 |
| RPBE            | -3.5                | 4.1  | 8.3  | 3.0 | 8.4                            | 8.4  | 14.4 | 5.9 | 0.9   | 5.7  | 14.4 | 4.8 |
| revPBE          | -3.9                | 4.4  | 8.9  | 3.2 | 7.8                            | 7.8  | 13.8 | 5.7 | 0.4   | 5.7  | 13.8 | 4.6 |
| mPBE            | -6.7                | 6.7  | 12.8 | 3.7 | 4.0                            | 4.5  | 8.4  | 3.1 | -2.7  | 5.8  | 12.8 | 3.7 |
| mPW             | -5.7                | 5.7  | 11.2 | 3.5 | 5.6                            | 5.6  | 10.2 | 4.0 | -1.5  | 5.7  | 11.2 | 3.7 |
| HTBS            | -7.9                | 7.9  | 14.7 | 4.3 | 1.4                            | 3.5  | 6.2  | 2.0 | -4.4  | 6.3  | 14.7 | 4.2 |
| OLYP            | -0.5                | 4.8  | 6.3  | 1.3 | 9.5                            | 9.9  | 16.6 | 6.7 | 3.2   | 6.7  | 16.6 | 4.9 |
| OPBE            | -4.8                | 6.5  | 11.3 | 3.9 | 0.3                            | 5.2  | 8.2  | 3.6 | -2.9  | 6.0  | 11.3 | 3.8 |
| XLYP            | -1.0                | 2.5  | 4.4  | 1.6 | 15.2                           | 15.2 | 19.6 | 6.1 | 5.1   | 7.2  | 19.6 | 7.3 |
|                 |                     |      |      |     | <i>Meta-GGAs</i>               |      |      |     |       |      |      |     |
| M06-L           | -1.4                | 2.4  | 4.2  | 1.2 | 4.5                            | 5.5  | 12.4 | 4.9 | 0.8   | 3.5  | 12.4 | 3.5 |
| MVS             | -6.2                | 6.2  | 13.7 | 5.2 | -1.6                           | 4.3  | 7.0  | 2.1 | -4.5  | 5.5  | 13.7 | 4.4 |
| TPSS            | -4.4                | 4.4  | 7.2  | 1.9 | 6.0                            | 6.1  | 10.1 | 4.3 | -0.5  | 5.0  | 10.1 | 3.2 |
| revTPSS         | -4.5                | 4.5  | 5.5  | 1.0 | 3.7                            | 4.7  | 6.8  | 2.3 | -1.4  | 4.6  | 6.8  | 1.6 |
|                 |                     |      |      |     | <i>Hybrids</i>                 |      |      |     |       |      |      |     |
| B3LYP           | 1.2                 | 2.2  | 3.7  | 1.1 | 8.2                            | 8.2  | 10.6 | 3.2 | 3.8   | 4.4  | 10.6 | 3.6 |
| B3LYP*          | -0.7                | 2.1  | 3.5  | 1.2 | 7.8                            | 7.8  | 10.3 | 3.1 | 2.5   | 4.2  | 10.3 | 3.5 |
| B1LYP           | 2.6                 | 2.8  | 4.9  | 1.7 | 8.2                            | 8.2  | 10.6 | 3.0 | 4.7   | 4.8  | 10.6 | 3.5 |
| B1PW91          | -1.3                | 2.4  | 4.3  | 1.6 | -0.1                           | 1.9  | 2.7  | 0.9 | -0.8  | 2.2  | 4.3  | 1.4 |
| BHandH          | -4.3                | 4.7  | 8.0  | 2.7 | -14.4                          | 14.4 | 19.3 | 7.0 | -8.1  | 8.3  | 19.3 | 6.7 |
| BHandHLYP       | 6.6                 | 6.6  | 8.1  | 1.5 | 2.1                            | 2.1  | 3.0  | 0.7 | 4.9   | 4.9  | 8.1  | 2.5 |
| KMLYP           | 1.0                 | 1.5  | 3.4  | 1.1 | -9.9                           | 9.9  | 13.4 | 4.8 | -3.1  | 4.7  | 13.4 | 5.1 |
| O3LYP           | -17.9               | 17.9 | 28.8 | 7.8 | -20.0                          | 20.0 | 28.2 | 8.8 | -18.7 | 18.7 | 28.8 | 8.2 |
| OPBE0           | -1.2                | 4.1  | 6.1  | 1.9 | -4.7                           | 4.7  | 7.9  | 3.4 | -2.5  | 4.3  | 7.9  | 2.6 |
| PBE0            | -3.4                | 3.4  | 7.4  | 2.6 | -3.1                           | 3.1  | 4.8  | 1.4 | -3.3  | 3.3  | 7.4  | 2.2 |
| mPW1PW          | -1.6                | 2.4  | 4.7  | 1.6 | -0.4                           | 1.6  | 1.8  | 0.3 | -1.2  | 2.1  | 4.7  | 1.3 |
| mPW1K           | 1.2                 | 1.4  | 4.3  | 1.5 | -4.7                           | 4.7  | 6.6  | 1.4 | -1.0  | 2.7  | 6.6  | 2.1 |
| S12H            | -2.3                | 2.7  | 6.1  | 2.0 | -2.6                           | 2.9  | 5.1  | 1.9 | -2.4  | 2.8  | 6.1  | 2.0 |
| X3LYP           | 0.8                 | 2.0  | 2.9  | 0.6 | 7.0                            | 7.0  | 8.8  | 2.5 | 3.1   | 3.8  | 8.8  | 2.9 |
|                 |                     |      |      |     | <i>Meta-Hybrids</i>            |      |      |     |       |      |      |     |
| M06             | 0.1                 | 1.7  | 4.3  | 1.5 | 1.8                            | 2.6  | 6.6  | 2.9 | 0.8   | 2.0  | 6.6  | 2.2 |
| M06-2X          | -0.1                | 1.5  | 2.2  | 0.6 | -0.9                           | 0.9  | 1.6  | 0.5 | -0.4  | 1.3  | 2.2  | 0.7 |
| M06-HF          | -0.9                | 1.6  | 5.3  | 1.9 | -4.2                           | 4.8  | 12.2 | 5.2 | -2.2  | 2.8  | 12.2 | 3.9 |
| TPSSH           | -2.9                | 2.9  | 5.0  | 1.7 | 3.7                            | 4.2  | 6.9  | 2.5 | -0.4  | 3.4  | 6.9  | 2.1 |
|                 |                     |      |      |     | <i>Double-Hybrids</i>          |      |      |     |       |      |      |     |
| B2K-PLYP        | -0.5                | 1.1  | 1.5  | 0.5 | 0.9                            | 1.8  | 3.5  | 1.2 | 0.1   | 1.4  | 3.5  | 0.9 |
| B2T-PLYP        | -0.2                | 1.1  | 1.4  | 0.4 | 3.2                            | 3.2  | 6.0  | 2.0 | 1.1   | 1.8  | 6.0  | 1.6 |
| B2-PLYP         | -0.5                | 1.2  | 2.0  | 0.7 | 4.7                            | 4.7  | 8.0  | 2.5 | 1.4   | 2.5  | 8.0  | 2.3 |
| LS1-TPSS        | -3.3                | 3.3  | 5.8  | 1.9 | -4.1                           | 4.1  | 8.6  | 3.3 | -3.6  | 3.6  | 8.6  | 2.5 |
| mPW2K-PLYP      | -0.6                | 1.2  | 1.8  | 0.5 | 0.8                            | 1.8  | 3.2  | 1.0 | -0.1  | 1.4  | 3.2  | 0.8 |
| mPW2-PLYP       | 0.2                 | 0.9  | 1.8  | 0.5 | 3.8                            | 3.8  | 6.1  | 1.7 | 1.5   | 2.0  | 6.1  | 1.8 |
| PBE0-DH         | -2.0                | 2.2  | 4.5  | 1.6 | -5.9                           | 5.9  | 9.1  | 2.3 | -3.4  | 3.6  | 9.1  | 2.6 |
| revDSD-BLYP     | -0.6                | 1.2  | 2.5  | 0.8 | 0.7                            | 1.9  | 3.0  | 0.8 | -0.1  | 1.5  | 3.0  | 0.9 |
| revDSD-PBE      | -1.6                | 1.7  | 3.3  | 1.2 | -1.5                           | 2.5  | 4.8  | 1.6 | -1.6  | 2.0  | 4.8  | 1.4 |
| revDSD-PBEP86   | 0.1                 | 0.8  | 1.3  | 0.4 | 0.4                            | 2.0  | 3.6  | 1.3 | 0.2   | 1.3  | 3.6  | 1.0 |
|                 |                     |      |      |     | <i>Range-Separated Hybrids</i> |      |      |     |       |      |      |     |
| CAM-B3LYP       | 2.4                 | 2.4  | 4.0  | 1.4 | 1.6                            | 1.6  | 2.4  | 0.5 | 2.1   | 2.1  | 4.0  | 1.2 |
| CAMY-B3LYP      | 1.0                 | 1.6  | 2.2  | 0.7 | 2.7                            | 2.7  | 3.4  | 0.6 | 1.6   | 2.0  | 3.4  | 0.9 |
| $\omega$ B97    | 3.6                 | 3.6  | 4.1  | 0.4 | -6.1                           | 6.1  | 8.0  | 1.5 | 0.0   | 4.5  | 8.0  | 1.5 |
| $\omega$ B97X   | 2.6                 | 2.6  | 3.6  | 0.8 | -3.3                           | 3.3  | 4.4  | 0.8 | 0.4   | 2.9  | 4.4  | 0.9 |
| $\omega$ B97X-D | 1.8                 | 2.0  | 4.5  | 1.7 | -0.1                           | 1.0  | 1.8  | 0.7 | 1.1   | 1.6  | 4.5  | 1.5 |

**Table S15** (continued).

| XC           | $\Delta E^\ddagger$         |      |      |     | $\Delta E_{\text{rxn}}$ |      |      |     | Total |      |      |     |
|--------------|-----------------------------|------|------|-----|-------------------------|------|------|-----|-------|------|------|-----|
|              | ME                          | MAE  | MUE  | SD  | ME                      | MAE  | MUE  | SD  | ME    | MAE  | MUE  | SD  |
|              | <i>Dispersion-Corrected</i> |      |      |     |                         |      |      |     |       |      |      |     |
| BP86-D3(BJ)  | -9.3                        | 9.3  | 15.5 | 3.9 | 2.2                     | 2.2  | 5.1  | 2.0 | -5.0  | 6.6  | 15.5 | 4.8 |
| BLYP-D3(BJ)  | -5.3                        | 5.3  | 9.2  | 2.7 | 10.3                    | 10.3 | 13.4 | 3.2 | 0.6   | 7.2  | 13.4 | 3.8 |
| PBE-D3(BJ)   | -9.7                        | 9.7  | 16.6 | 4.1 | 0.5                     | 1.9  | 3.6  | 1.2 | -5.9  | 6.8  | 16.6 | 5.0 |
| OLYP-D3(BJ)  | -9.2                        | 9.2  | 14.0 | 3.8 | 0.4                     | 2.2  | 4.0  | 1.3 | -5.6  | 6.6  | 14.0 | 4.6 |
| OPBE-D3(BJ)  | -13.2                       | 13.2 | 20.3 | 5.1 | -8.4                    | 8.4  | 13.9 | 4.1 | -11.4 | 11.4 | 20.3 | 5.3 |
| B3LYP-D3(BJ) | -2.0                        | 2.5  | 4.3  | 1.3 | 5.1                     | 5.1  | 6.3  | 1.0 | 0.7   | 3.4  | 6.3  | 1.7 |
| PBE0-D3(BJ)  | -5.1                        | 5.1  | 9.3  | 2.9 | -4.7                    | 4.7  | 7.6  | 2.0 | -4.9  | 4.9  | 9.3  | 2.6 |
| M06-2X-D3    | -0.2                        | 1.5  | 2.2  | 0.7 | -1.0                    | 1.0  | 1.7  | 0.6 | -0.5  | 1.3  | 2.2  | 0.7 |

**Table S16.** Reaction barriers and reaction energies (kcal mol<sup>-1</sup>) for the various pericyclic reactions, computed with XC/TZ2P//BP86/DZ.

| XC              | Diels-Alder Reaction           |                         | 1,3-dipolar Cycloaddition |                         | Electrocyclic Rearrangement |                         | Sigmatropic Rearrangement |                         | Double Group Transfer |                         |
|-----------------|--------------------------------|-------------------------|---------------------------|-------------------------|-----------------------------|-------------------------|---------------------------|-------------------------|-----------------------|-------------------------|
|                 | $\Delta E^\ddagger$            | $\Delta E_{\text{rxn}}$ | $\Delta E^\ddagger$       | $\Delta E_{\text{rxn}}$ | $\Delta E^\ddagger$         | $\Delta E_{\text{rxn}}$ | $\Delta E^\ddagger$       | $\Delta E_{\text{rxn}}$ | $\Delta E^\ddagger$   | $\Delta E_{\text{rxn}}$ |
|                 | <i>LDA</i>                     |                         |                           |                         |                             |                         |                           |                         |                       |                         |
| VWN             | 1.2                            | -64.0                   | 3.7                       | -38.6                   | 37.1                        | 3.9                     | 22.2                      | 0.0                     | 22.3                  | 0.0                     |
|                 | <i>GGAs</i>                    |                         |                           |                         |                             |                         |                           |                         |                       |                         |
| BP86            | 15.2                           | -41.5                   | 15.4                      | -18.6                   | 40.1                        | 9.1                     | 28.3                      | 0.0                     | 38.2                  | 0.0                     |
| BLYP            | 21.1                           | -29.7                   | 18.9                      | -9.6                    | 42.9                        | 14.3                    | 31.8                      | 0.0                     | 45.2                  | 0.0                     |
| BEE             | 16.4                           | -42.2                   | 17.4                      | -17.4                   | 39.4                        | 7.4                     | 28.2                      | 0.0                     | 38.6                  | 0.0                     |
| PW91            | 12.6                           | -45.4                   | 13.5                      | -21.5                   | 39.8                        | 8.4                     | 27.9                      | 0.0                     | 36.0                  | 0.0                     |
| PBE             | 13.1                           | -45.4                   | 14.1                      | -21.2                   | 39.5                        | 7.8                     | 27.7                      | 0.0                     | 36.0                  | 0.0                     |
| PBEsol          | 7.0                            | -55.9                   | 9.4                       | -30.5                   | 37.4                        | 4.5                     | 24.2                      | 0.0                     | 28.6                  | 0.0                     |
| RPBE            | 18.9                           | -37.3                   | 19.3                      | -13.5                   | 40.4                        | 9.1                     | 29.9                      | 0.0                     | 41.9                  | 0.0                     |
| revPBE          | 18.7                           | -38.1                   | 19.1                      | -14.1                   | 40.2                        | 8.8                     | 29.5                      | 0.0                     | 41.4                  | 0.0                     |
| mPBE            | 14.6                           | -43.2                   | 15.4                      | -19.1                   | 39.8                        | 8.2                     | 28.3                      | 0.0                     | 37.6                  | 0.0                     |
| mPW             | 15.7                           | -41.1                   | 16.1                      | -17.5                   | 40.3                        | 9.2                     | 28.9                      | 0.0                     | 39.1                  | 0.0                     |
| HTBS            | 14.2                           | -46.2                   | 16.0                      | -21.3                   | 38.1                        | 5.8                     | 26.3                      | 0.0                     | 35.7                  | 0.0                     |
| OLYP            | 24.3                           | -34.9                   | 24.1                      | -10.8                   | 41.1                        | 8.5                     | 31.0                      | 0.0                     | 45.8                  | 0.0                     |
| OPBE            | 19.8                           | -46.9                   | 22.7                      | -18.5                   | 37.8                        | 2.0                     | 27.4                      | 0.0                     | 39.4                  | 0.0                     |
| XLYP            | 21.3                           | -28.5                   | 18.9                      | -8.8                    | 43.4                        | 15.1                    | 32.4                      | 0.0                     | 45.9                  | 0.0                     |
|                 | <i>Meta-GGAs</i>               |                         |                           |                         |                             |                         |                           |                         |                       |                         |
| M06-L           | 16.8                           | -44.6                   | 18.6                      | -14.7                   | 44.1                        | 7.8                     | 34.4                      | 0.0                     | 46.2                  | 0.0                     |
| MVS             | 12.4                           | -54.0                   | 17.7                      | -22.2                   | 43.4                        | 7.1                     | 28.7                      | 0.0                     | 37.1                  | 0.0                     |
| TPSS            | 15.8                           | -39.5                   | 15.9                      | -17.5                   | 40.7                        | 8.8                     | 31.0                      | 0.0                     | 43.0                  | 0.0                     |
| revTPSS         | 14.8                           | -41.7                   | 15.0                      | -20.2                   | 40.2                        | 7.3                     | 31.6                      | 0.0                     | 45.0                  | 0.0                     |
|                 | <i>Hybrids</i>                 |                         |                           |                         |                             |                         |                           |                         |                       |                         |
| B3LYP           | 22.7                           | -37.1                   | 21.1                      | -16.9                   | 45.3                        | 12.6                    | 35.2                      | 0.0                     | 49.6                  | 0.0                     |
| B3LYP*          | 20.8                           | -37.8                   | 19.4                      | -17.2                   | 44.2                        | 12.3                    | 33.6                      | 0.0                     | 46.8                  | 0.0                     |
| B1LYP           | 24.1                           | -36.9                   | 22.3                      | -17.2                   | 46.2                        | 12.9                    | 36.6                      | 0.0                     | 52.0                  | 0.0                     |
| B1PW91          | 19.8                           | -47.8                   | 20.9                      | -24.1                   | 43.2                        | 7.0                     | 33.4                      | 0.0                     | 46.3                  | 0.0                     |
| BHandH          | 13.2                           | -65.8                   | 14.6                      | -44.2                   | 45.2                        | 5.2                     | 34.7                      | 0.0                     | 42.8                  | 0.0                     |
| BHandHLYP       | 27.0                           | -44.2                   | 25.5                      | -25.2                   | 49.3                        | 11.4                    | 41.5                      | 0.0                     | 58.6                  | 0.0                     |
| KMLYP           | 19.4                           | -59.8                   | 20.2                      | -38.5                   | 47.5                        | 6.7                     | 38.5                      | 0.0                     | 50.5                  | 0.0                     |
| O3LYP           | -1.2                           | -74.3                   | 2.0                       | -48.5                   | 38.4                        | 2.2                     | 23.5                      | 0.0                     | 22.2                  | 0.0                     |
| OPBE0           | 21.7                           | -53.1                   | 24.7                      | -25.8                   | 41.2                        | 1.8                     | 32.2                      | 0.0                     | 45.7                  | 0.0                     |
| PBE0            | 16.7                           | -51.8                   | 18.2                      | -27.8                   | 42.6                        | 6.2                     | 32.5                      | 0.0                     | 43.2                  | 0.0                     |
| mPW1PW          | 18.9                           | -48.2                   | 19.9                      | -24.8                   | 43.4                        | 7.5                     | 33.6                      | 0.0                     | 45.8                  | 0.0                     |
| mPW1K           | 21.1                           | -53.4                   | 22.4                      | -30.3                   | 45.5                        | 6.2                     | 37.0                      | 0.0                     | 50.5                  | 0.0                     |
| S12H            | 16.6                           | -52.1                   | 19.0                      | -25.7                   | 43.6                        | 6.3                     | 34.5                      | 0.0                     | 44.5                  | 0.0                     |
| X3LYP           | 22.0                           | -38.6                   | 20.5                      | -18.6                   | 45.4                        | 12.4                    | 35.3                      | 0.0                     | 49.2                  | 0.0                     |
|                 | <i>Meta-Hybrids</i>            |                         |                           |                         |                             |                         |                           |                         |                       |                         |
| M06             | 19.5                           | -47.1                   | 21.2                      | -20.2                   | 44.1                        | 8.2                     | 35.3                      | 0.0                     | 48.6                  | 0.0                     |
| M06-2X          | 17.9                           | -48.8                   | 20.9                      | -27.6                   | 45.1                        | 8.8                     | 36.8                      | 0.0                     | 49.0                  | 0.0                     |
| M06-HF          | 15.1                           | -48.8                   | 20.3                      | -38.7                   | 43.7                        | 9.7                     | 38.2                      | 0.0                     | 51.2                  | 0.0                     |
| TPSSH           | 17.1                           | -42.5                   | 17.4                      | -20.4                   | 41.9                        | 8.1                     | 32.7                      | 0.0                     | 45.4                  | 0.0                     |
|                 | <i>Double-Hybrids</i>          |                         |                           |                         |                             |                         |                           |                         |                       |                         |
| B2K-PLYP        | 18.5                           | -48.6                   | 18.2                      | -21.8                   | 45.3                        | 9.8                     | 36.1                      | 0.0                     | 49.3                  | 0.0                     |
| B2T-PLYP        | 19.4                           | -45.4                   | 18.6                      | -19.7                   | 45.1                        | 10.6                    | 35.7                      | 0.0                     | 49.3                  | 0.0                     |
| B2-PLYP         | 19.3                           | -43.4                   | 18.3                      | -18.0                   | 44.7                        | 11.1                    | 35.0                      | 0.0                     | 48.5                  | 0.0                     |
| LS1-TPSS        | 14.6                           | -55.8                   | 16.5                      | -25.4                   | 43.6                        | 6.6                     | 34.2                      | 0.0                     | 45.8                  | 0.0                     |
| mPW2K-PLYP      | 18.1                           | -48.8                   | 17.8                      | -22.1                   | 45.4                        | 10.0                    | 36.1                      | 0.0                     | 49.1                  | 0.0                     |
| mPW2-PLYP       | 19.7                           | -44.4                   | 18.6                      | -19.9                   | 45.5                        | 11.3                    | 36.1                      | 0.0                     | 49.6                  | 0.0                     |
| PBE0-DH         | 17.2                           | -56.0                   | 18.9                      | -30.1                   | 43.8                        | 5.5                     | 34.6                      | 0.0                     | 46.2                  | 0.0                     |
| revDSD-BLYP     | 17.4                           | -49.2                   | 17.4                      | -22.3                   | 45.3                        | 10.1                    | 37.0                      | 0.0                     | 49.5                  | 0.0                     |
| revDSD-PBE      | 16.6                           | -52.1                   | 17.3                      | -23.9                   | 44.1                        | 7.8                     | 36.2                      | 0.0                     | 47.5                  | 0.0                     |
| revDSD-PBEP86   | 18.8                           | -49.5                   | 18.9                      | -21.9                   | 44.9                        | 8.7                     | 37.2                      | 0.0                     | 49.7                  | 0.0                     |
|                 | <i>Range-Separated Hybrids</i> |                         |                           |                         |                             |                         |                           |                         |                       |                         |
| CAM-B3LYP       | 23.7                           | -44.9                   | 21.5                      | -25.4                   | 46.7                        | 10.3                    | 37.6                      | 0.0                     | 51.8                  | 0.0                     |
| CAMY-B3LYP      | 21.7                           | -43.9                   | 20.1                      | -24.1                   | 45.9                        | 10.9                    | 36.4                      | 0.0                     | 49.9                  | 0.0                     |
| $\omega$ B97    | 23.4                           | -55.3                   | 22.0                      | -32.1                   | 47.3                        | 4.8                     | 40.8                      | 0.0                     | 53.6                  | 0.0                     |
| $\omega$ B97X   | 22.9                           | -51.7                   | 21.5                      | -29.5                   | 46.8                        | 6.8                     | 39.3                      | 0.0                     | 52.1                  | 0.0                     |
| $\omega$ B97X-D | 23.2                           | -47.2                   | 22.3                      | -25.5                   | 45.4                        | 7.5                     | 36.8                      | 0.0                     | 50.5                  | 0.0                     |

**Table S16** (continued).

| XC           | Diels-Alder<br>Reaction     |                         | 1,3-dipolar<br>Cycloaddition |                         | Electrocyclic<br>Rearrangement |                         | Sigmatropic<br>Rearrangement |                         | Double Group<br>Transfer |                         |
|--------------|-----------------------------|-------------------------|------------------------------|-------------------------|--------------------------------|-------------------------|------------------------------|-------------------------|--------------------------|-------------------------|
|              | $\Delta E^\ddagger$         | $\Delta E_{\text{rxn}}$ | $\Delta E^\ddagger$          | $\Delta E_{\text{rxn}}$ | $\Delta E^\ddagger$            | $\Delta E_{\text{rxn}}$ | $\Delta E^\ddagger$          | $\Delta E_{\text{rxn}}$ | $\Delta E^\ddagger$      | $\Delta E_{\text{rxn}}$ |
|              | <i>Dispersion-Corrected</i> |                         |                              |                         |                                |                         |                              |                         |                          |                         |
| BP86-D3(BJ)  | 9.1                         | -46.4                   | 11.3                         | -22.3                   | 39.8                           | 9.3                     | 27.7                         | 0.0                     | 34.8                     | 0.0                     |
| BLYP-D3(BJ)  | 13.2                        | -36.0                   | 13.6                         | -14.7                   | 42.5                           | 14.4                    | 30.8                         | 0.0                     | 40.8                     | 0.0                     |
| PBE-D3(BJ)   | 9.2                         | -48.6                   | 11.4                         | -23.6                   | 39.3                           | 7.8                     | 27.3                         | 0.0                     | 33.7                     | 0.0                     |
| OLYP-D3(BJ)  | 8.1                         | -49.0                   | 12.9                         | -22.4                   | 39.6                           | 8.2                     | 27.6                         | 0.0                     | 36.5                     | 0.0                     |
| OPBE-D3(BJ)  | 3.8                         | -60.6                   | 11.7                         | -29.6                   | 36.4                           | 1.8                     | 24.5                         | 0.0                     | 30.3                     | 0.0                     |
| B3LYP-D3(BJ) | 16.3                        | -42.2                   | 16.8                         | -21.0                   | 44.9                           | 12.7                    | 34.5                         | 0.0                     | 46.0                     | 0.0                     |
| PBE0-D3(BJ)  | 9.6                         | -48.2                   | 11.7                         | -23.3                   | 39.3                           | 7.9                     | 27.4                         | 0.0                     | 34.0                     | 0.0                     |
| M06-2X-D3    | 17.7                        | -49.0                   | 20.8                         | -27.7                   | 45.1                           | 8.7                     | 36.8                         | 0.0                     | 49.4                     | 0.0                     |

**Table S17.** Errors in reaction barriers and reaction energies (kcal mol<sup>-1</sup>) for the various pericyclic reactions, computed with XC/TZ2P//BP86/DZ, compared to CCSDT(Q)/CBS//CCSD(T)/cc-pVTZ.

| XC              | Diels-Alder Reaction           |                         | 1,3-dipolar Cycloaddition |                         | Electrocyclic Rearrangement |                         | Sigmatropic Rearrangement |                         | Double Group Transfer |                         |  |
|-----------------|--------------------------------|-------------------------|---------------------------|-------------------------|-----------------------------|-------------------------|---------------------------|-------------------------|-----------------------|-------------------------|--|
|                 | $\Delta E^\ddagger$            | $\Delta E_{\text{rxn}}$ | $\Delta E^\ddagger$       | $\Delta E_{\text{rxn}}$ | $\Delta E^\ddagger$         | $\Delta E_{\text{rxn}}$ | $\Delta E^\ddagger$       | $\Delta E_{\text{rxn}}$ | $\Delta E^\ddagger$   | $\Delta E_{\text{rxn}}$ |  |
|                 | <i>LDA</i>                     |                         |                           |                         |                             |                         |                           |                         |                       |                         |  |
| VWN             | -18.4                          | -16.4                   | -14.6                     | -9.7                    | -6.3                        | -4.6                    | -14.6                     | 0.0                     | -27.9                 | 0.0                     |  |
|                 | <i>GGAs</i>                    |                         |                           |                         |                             |                         |                           |                         |                       |                         |  |
| BP86            | -4.4                           | 6.2                     | -2.9                      | 10.3                    | -3.3                        | 0.7                     | -8.5                      | 0.0                     | -12.0                 | 0.0                     |  |
| BLYP            | 1.5                            | 18.0                    | 0.6                       | 19.3                    | -0.5                        | 5.9                     | -5.0                      | 0.0                     | -5.0                  | 0.0                     |  |
| BEE             | -3.2                           | 5.5                     | -0.9                      | 11.5                    | -4.0                        | -1.1                    | -8.6                      | 0.0                     | -11.6                 | 0.0                     |  |
| PW91            | -7.0                           | 2.3                     | -4.8                      | 7.4                     | -3.6                        | 0.0                     | -8.9                      | 0.0                     | -14.2                 | 0.0                     |  |
| PBE             | -6.5                           | 2.3                     | -4.2                      | 7.7                     | -3.9                        | -0.6                    | -9.1                      | 0.0                     | -14.2                 | 0.0                     |  |
| PBEsol          | -12.6                          | -8.3                    | -8.9                      | -1.6                    | -6.0                        | -4.0                    | -12.6                     | 0.0                     | -21.6                 | 0.0                     |  |
| RPBE            | -0.7                           | 10.4                    | 1.0                       | 15.4                    | -3.0                        | 0.7                     | -6.9                      | 0.0                     | -8.3                  | 0.0                     |  |
| revPBE          | -0.9                           | 9.6                     | 0.8                       | 14.8                    | -3.2                        | 0.4                     | -7.3                      | 0.0                     | -8.8                  | 0.0                     |  |
| mPBE            | -5.0                           | 4.5                     | -2.9                      | 9.8                     | -3.6                        | -0.3                    | -8.5                      | 0.0                     | -12.6                 | 0.0                     |  |
| mPW             | -3.9                           | 6.6                     | -2.2                      | 11.4                    | -3.1                        | 0.8                     | -7.9                      | 0.0                     | -11.1                 | 0.0                     |  |
| HTBS            | -5.4                           | 1.5                     | -2.3                      | 7.6                     | -5.3                        | -2.7                    | -10.5                     | 0.0                     | -14.5                 | 0.0                     |  |
| OLYP            | 4.7                            | 12.8                    | 5.8                       | 18.1                    | -2.3                        | 0.1                     | -5.8                      | 0.0                     | -4.4                  | 0.0                     |  |
| OPBE            | 0.2                            | 0.8                     | 4.4                       | 10.4                    | -5.6                        | -6.5                    | -9.4                      | 0.0                     | -10.8                 | 0.0                     |  |
| XLYP            | 1.7                            | 19.2                    | 0.6                       | 20.1                    | 0.0                         | 6.7                     | -4.4                      | 0.0                     | -4.3                  | 0.0                     |  |
|                 | <i>Meta-GGAs</i>               |                         |                           |                         |                             |                         |                           |                         |                       |                         |  |
| M06-L           | -2.8                           | 3.1                     | 0.3                       | 14.2                    | 0.7                         | -0.6                    | -2.4                      | 0.0                     | -4.0                  | 0.0                     |  |
| MVS             | -7.2                           | -6.4                    | -0.6                      | 6.7                     | 0.0                         | -1.4                    | -8.1                      | 0.0                     | -13.1                 | 0.0                     |  |
| TPSS            | -3.8                           | 8.2                     | -2.4                      | 11.4                    | -2.7                        | 0.4                     | -5.8                      | 0.0                     | -7.2                  | 0.0                     |  |
| revTPSS         | -4.8                           | 6.0                     | -3.3                      | 8.7                     | -3.2                        | -1.2                    | -5.2                      | 0.0                     | -5.2                  | 0.0                     |  |
|                 | <i>Hybrids</i>                 |                         |                           |                         |                             |                         |                           |                         |                       |                         |  |
| B3LYP           | 3.1                            | 10.6                    | 2.8                       | 12.0                    | 1.9                         | 4.2                     | -1.6                      | 0.0                     | -0.6                  | 0.0                     |  |
| B3LYP*          | 1.2                            | 9.9                     | 1.1                       | 11.7                    | 0.8                         | 3.9                     | -3.2                      | 0.0                     | -3.4                  | 0.0                     |  |
| B1LYP           | 4.5                            | 10.8                    | 4.0                       | 11.7                    | 2.8                         | 4.5                     | -0.2                      | 0.0                     | 1.8                   | 0.0                     |  |
| B1PW91          | 0.2                            | -0.1                    | 2.6                       | 4.8                     | -0.2                        | -1.5                    | -3.4                      | 0.0                     | -3.9                  | 0.0                     |  |
| BHandH          | -6.4                           | -18.2                   | -3.7                      | -15.3                   | 1.8                         | -3.3                    | -2.1                      | 0.0                     | -7.4                  | 0.0                     |  |
| BHandHLYP       | 7.4                            | 3.5                     | 7.2                       | 3.7                     | 5.9                         | 3.0                     | 4.7                       | 0.0                     | 8.4                   | 0.0                     |  |
| KMLYP           | -0.2                           | -12.2                   | 1.9                       | -9.6                    | 4.1                         | -1.8                    | 1.7                       | 0.0                     | 0.3                   | 0.0                     |  |
| O3LYP           | -20.8                          | -26.7                   | -16.3                     | -19.6                   | -5.0                        | -6.3                    | -13.3                     | 0.0                     | -28.0                 | 0.0                     |  |
| OPBE0           | 2.1                            | -5.5                    | 6.4                       | 3.1                     | -2.2                        | -6.7                    | -4.6                      | 0.0                     | -4.5                  | 0.0                     |  |
| PBE0            | -2.9                           | -4.2                    | -0.1                      | 1.1                     | -0.8                        | -2.3                    | -4.3                      | 0.0                     | -7.0                  | 0.0                     |  |
| mPW1PW          | -0.7                           | -0.6                    | 1.6                       | 4.1                     | 0.0                         | -0.9                    | -3.2                      | 0.0                     | -4.4                  | 0.0                     |  |
| mPW1K           | 1.5                            | -5.8                    | 4.1                       | -1.4                    | 2.1                         | -2.3                    | 0.2                       | 0.0                     | 0.3                   | 0.0                     |  |
| S12H            | -3.0                           | -4.5                    | 0.7                       | 3.2                     | 0.2                         | -2.2                    | -2.3                      | 0.0                     | -5.7                  | 0.0                     |  |
| X3LYP           | 2.4                            | 9.1                     | 2.2                       | 10.3                    | 2.0                         | 4.0                     | -1.5                      | 0.0                     | -1.0                  | 0.0                     |  |
|                 | <i>Meta-Hybrids</i>            |                         |                           |                         |                             |                         |                           |                         |                       |                         |  |
| M06             | -0.1                           | 0.5                     | 2.9                       | 8.7                     | 0.7                         | -0.3                    | -1.5                      | 0.0                     | -1.6                  | 0.0                     |  |
| M06-2X          | -1.7                           | -1.2                    | 2.6                       | 1.3                     | 1.7                         | 0.4                     | 0.0                       | 0.0                     | -1.2                  | 0.0                     |  |
| M06-HF          | -4.5                           | -1.2                    | 2.0                       | -9.8                    | 0.3                         | 1.3                     | 1.4                       | 0.0                     | 1.0                   | 0.0                     |  |
| TPSSH           | -2.5                           | 5.2                     | -0.9                      | 8.5                     | -1.5                        | -0.4                    | -4.1                      | 0.0                     | -4.8                  | 0.0                     |  |
|                 | <i>Double-Hybrids</i>          |                         |                           |                         |                             |                         |                           |                         |                       |                         |  |
| B2K-PLYP        | -1.1                           | -1.0                    | -0.1                      | 7.1                     | 1.9                         | 1.4                     | -0.7                      | 0.0                     | -0.9                  | 0.0                     |  |
| B2T-PLYP        | -0.2                           | 2.3                     | 0.3                       | 9.2                     | 1.7                         | 2.2                     | -1.1                      | 0.0                     | -0.9                  | 0.0                     |  |
| B2-PLYP         | -0.3                           | 4.3                     | 0.0                       | 10.9                    | 1.3                         | 2.7                     | -1.8                      | 0.0                     | -1.7                  | 0.0                     |  |
| LS1-TPSS        | -5.0                           | -8.2                    | -1.8                      | 3.5                     | 0.2                         | -1.9                    | -2.6                      | 0.0                     | -4.4                  | 0.0                     |  |
| mPW2K-PLYP      | -1.5                           | -1.2                    | -0.5                      | 6.8                     | 2.0                         | 1.6                     | -0.7                      | 0.0                     | -1.1                  | 0.0                     |  |
| mPW2-PLYP       | 0.1                            | 3.3                     | 0.3                       | 9.0                     | 2.1                         | 2.9                     | -0.7                      | 0.0                     | -0.6                  | 0.0                     |  |
| PBE0-DH         | -2.4                           | -8.4                    | 0.6                       | -1.2                    | 0.4                         | -3.0                    | -2.2                      | 0.0                     | -4.0                  | 0.0                     |  |
| revDSD-BLYP     | -2.2                           | -1.6                    | -0.9                      | 6.6                     | 1.9                         | 1.7                     | 0.2                       | 0.0                     | -0.7                  | 0.0                     |  |
| revDSD-PBE      | -3.0                           | -4.5                    | -1.0                      | 5.0                     | 0.7                         | -0.6                    | -0.6                      | 0.0                     | -2.7                  | 0.0                     |  |
| revDSD-PBEP86   | -0.8                           | -1.9                    | 0.6                       | 7.0                     | 1.5                         | 0.3                     | 0.4                       | 0.0                     | -0.5                  | 0.0                     |  |
|                 | <i>Range-Separated Hybrids</i> |                         |                           |                         |                             |                         |                           |                         |                       |                         |  |
| CAM-B3LYP       | 4.1                            | 2.8                     | 3.2                       | 3.5                     | 3.3                         | 1.9                     | 0.8                       | 0.0                     | 1.6                   | 0.0                     |  |
| CAMY-B3LYP      | 2.1                            | 3.8                     | 1.8                       | 4.8                     | 2.5                         | 2.5                     | -0.4                      | 0.0                     | -0.3                  | 0.0                     |  |
| $\omega$ B97    | 3.8                            | -7.7                    | 3.7                       | -3.2                    | 3.9                         | -3.7                    | 4.0                       | 0.0                     | 3.4                   | 0.0                     |  |
| $\omega$ B97X   | 3.3                            | -4.1                    | 3.2                       | -0.6                    | 3.4                         | -1.7                    | 2.5                       | 0.0                     | 1.9                   | 0.0                     |  |
| $\omega$ B97X-D | 3.6                            | 0.4                     | 4.0                       | 3.4                     | 2.0                         | -0.9                    | 0.0                       | 0.0                     | 0.3                   | 0.0                     |  |

**Table S17** (continued).

| XC           | Diels-Alder<br>Reaction     |                         | 1,3-dipolar<br>Cycloaddition |                         | Electrocyclic<br>Rearrangement |                         | Sigmatropic<br>Rearrangement |                         | Double Group<br>Transfer |                         |
|--------------|-----------------------------|-------------------------|------------------------------|-------------------------|--------------------------------|-------------------------|------------------------------|-------------------------|--------------------------|-------------------------|
|              | $\Delta E^\ddagger$         | $\Delta E_{\text{rxn}}$ | $\Delta E^\ddagger$          | $\Delta E_{\text{rxn}}$ | $\Delta E^\ddagger$            | $\Delta E_{\text{rxn}}$ | $\Delta E^\ddagger$          | $\Delta E_{\text{rxn}}$ | $\Delta E^\ddagger$      | $\Delta E_{\text{rxn}}$ |
|              | <i>Dispersion-Corrected</i> |                         |                              |                         |                                |                         |                              |                         |                          |                         |
| BP86-D3(BJ)  | -10.5                       | 1.3                     | -7.0                         | 6.6                     | -3.6                           | 0.9                     | -9.1                         | 0.0                     | -15.4                    | 0.0                     |
| BLYP-D3(BJ)  | -6.4                        | 11.7                    | -4.7                         | 14.2                    | -0.9                           | 6.0                     | -6.0                         | 0.0                     | -9.4                     | 0.0                     |
| PBE-D3(BJ)   | -10.4                       | -1.0                    | -6.9                         | 5.3                     | -4.1                           | -0.6                    | -9.5                         | 0.0                     | -16.5                    | 0.0                     |
| OLYP-D3(BJ)  | -11.5                       | -1.4                    | -5.4                         | 6.5                     | -3.8                           | -0.3                    | -9.2                         | 0.0                     | -13.7                    | 0.0                     |
| OPBE-D3(BJ)  | -15.8                       | -13.0                   | -6.6                         | -0.7                    | -7.0                           | -6.7                    | -12.3                        | 0.0                     | -19.9                    | 0.0                     |
| B3LYP-D3(BJ) | -3.3                        | 5.5                     | -1.5                         | 7.9                     | 1.5                            | 4.3                     | -2.3                         | 0.0                     | -4.2                     | 0.0                     |
| PBE0-D3(BJ)  | -10.0                       | -0.6                    | -6.6                         | 5.6                     | -4.1                           | -0.5                    | -9.4                         | 0.0                     | -16.2                    | 0.0                     |
| M06-2X-D3    | -1.9                        | -1.4                    | 2.5                          | 1.2                     | 1.7                            | 0.3                     | 0.0                          | 0.0                     | -0.8                     | 0.0                     |

**Table S18.** Mean error (ME), mean absolute error (MAE), maximum unsigned error (MUE) and standard deviation (SD) of reaction barriers and energies (kcal mol<sup>-1</sup>) for the various pericyclic reactions, computed with XC/TZ2P//BP86/DZ compared to CCSDT(Q)/CBS//CCSD(T)/cc-pVTZ.

| XC              | $\Delta E^\ddagger$ |      |      |     | $\Delta E_{\text{rxn}}$ |                                |      |     | Total |      |      |     |
|-----------------|---------------------|------|------|-----|-------------------------|--------------------------------|------|-----|-------|------|------|-----|
|                 | ME                  | MAE  | MUE  | SD  | ME                      | MAE                            | MUE  | SD  | ME    | MAE  | MUE  | SD  |
| VWN             | -16.4               | 16.4 | 27.9 | 7.0 | -10.2                   | 10.2                           | 16.4 | 4.8 | -14.1 | 14.1 | 27.9 | 6.9 |
|                 |                     |      |      |     |                         | <i>LDA</i>                     |      |     |       |      |      |     |
|                 |                     |      |      |     |                         | <i>GGAs</i>                    |      |     |       |      |      |     |
| BP86            | -6.2                | 6.2  | 12.0 | 3.5 | 5.7                     | 5.7                            | 10.3 | 3.9 | -1.8  | 6.0  | 12.0 | 3.7 |
| BLYP            | -1.7                | 2.5  | 5.0  | 2.0 | 14.4                    | 14.4                           | 19.3 | 6.0 | 4.3   | 7.0  | 19.3 | 7.0 |
| BEE             | -5.7                | 5.7  | 11.6 | 3.9 | 5.3                     | 6.0                            | 11.5 | 4.3 | -1.6  | 5.8  | 11.6 | 4.0 |
| PW91            | -7.7                | 7.7  | 14.2 | 3.7 | 3.2                     | 3.2                            | 7.4  | 3.1 | -3.6  | 6.0  | 14.2 | 4.1 |
| PBE             | -7.6                | 7.6  | 14.2 | 3.8 | 3.1                     | 3.5                            | 7.7  | 3.0 | -3.6  | 6.1  | 14.2 | 4.0 |
| PBEsol          | -12.3               | 12.3 | 21.6 | 5.3 | -4.6                    | 4.6                            | 8.3  | 2.7 | -9.4  | 9.4  | 21.6 | 5.8 |
| RPBE            | -3.6                | 4.0  | 8.3  | 3.1 | 8.8                     | 8.8                            | 15.4 | 6.1 | 1.1   | 5.8  | 15.4 | 5.0 |
| revPBE          | -3.9                | 4.2  | 8.8  | 3.3 | 8.2                     | 8.2                            | 14.8 | 6.0 | 0.7   | 5.7  | 14.8 | 4.9 |
| mPBE            | -6.5                | 6.5  | 12.6 | 3.6 | 4.7                     | 4.8                            | 9.8  | 3.9 | -2.3  | 5.9  | 12.6 | 3.8 |
| mPW             | -5.6                | 5.6  | 11.1 | 3.4 | 6.2                     | 6.2                            | 11.4 | 4.3 | -1.2  | 5.9  | 11.4 | 3.8 |
| HTBS            | -7.6                | 7.6  | 14.5 | 4.4 | 2.1                     | 3.9                            | 7.6  | 2.6 | -4.0  | 6.2  | 14.5 | 4.2 |
| OLYP            | -0.4                | 4.6  | 5.8  | 1.3 | 10.3                    | 10.3                           | 18.1 | 7.6 | 3.6   | 6.7  | 18.1 | 5.5 |
| OPBE            | -4.2                | 6.1  | 10.8 | 3.8 | 1.6                     | 5.9                            | 10.4 | 3.9 | -2.1  | 6.0  | 10.8 | 3.8 |
| XLYP            | -1.3                | 2.2  | 4.4  | 1.8 | 15.3                    | 15.3                           | 20.1 | 6.1 | 4.9   | 7.1  | 20.1 | 7.5 |
|                 |                     |      |      |     |                         | <i>Meta-GGAs</i>               |      |     |       |      |      |     |
| M06-L           | -1.6                | 2.0  | 4.0  | 1.4 | 5.5                     | 6.0                            | 14.2 | 5.9 | 1.0   | 3.5  | 14.2 | 4.2 |
| MVS             | -5.8                | 5.8  | 13.1 | 4.9 | -0.3                    | 4.8                            | 6.7  | 2.4 | -3.8  | 5.4  | 13.1 | 4.2 |
| TPSS            | -4.4                | 4.4  | 7.2  | 1.9 | 6.6                     | 6.6                            | 11.4 | 4.6 | -0.3  | 5.2  | 11.4 | 3.4 |
| revTPSS         | -4.3                | 4.3  | 5.2  | 0.9 | 4.5                     | 5.3                            | 8.7  | 3.1 | -1.0  | 4.7  | 8.7  | 2.1 |
|                 |                     |      |      |     |                         | <i>Hybrids</i>                 |      |     |       |      |      |     |
| B3LYP           | 1.1                 | 2.0  | 3.1  | 0.9 | 8.9                     | 8.9                            | 12.0 | 3.4 | 4.0   | 4.6  | 12.0 | 4.0 |
| B3LYP*          | -0.7                | 1.9  | 3.4  | 1.1 | 8.5                     | 8.5                            | 11.7 | 3.3 | 2.7   | 4.4  | 11.7 | 3.9 |
| B1LYP           | 2.6                 | 2.7  | 4.5  | 1.6 | 9.0                     | 9.0                            | 11.7 | 3.2 | 5.0   | 5.0  | 11.7 | 3.8 |
| B1PW91          | -0.9                | 2.1  | 3.9  | 1.6 | 1.1                     | 2.1                            | 4.8  | 1.9 | -0.2  | 2.1  | 4.8  | 1.7 |
| BHandH          | -3.6                | 4.3  | 7.4  | 2.3 | -12.2                   | 12.2                           | 18.2 | 6.5 | -6.8  | 7.3  | 18.2 | 5.8 |
| BHandHLYP       | 6.7                 | 6.7  | 8.4  | 1.3 | 3.4                     | 3.4                            | 3.7  | 0.3 | 5.5   | 5.5  | 8.4  | 1.9 |
| KMLYP           | 1.6                 | 1.6  | 4.1  | 1.4 | -7.8                    | 7.8                            | 12.2 | 4.4 | -2.0  | 4.0  | 12.2 | 4.2 |
| O3LYP           | -16.7               | 16.7 | 28.0 | 7.6 | -17.5                   | 17.5                           | 26.7 | 8.5 | -17.0 | 17.0 | 28.0 | 8.0 |
| OPBE0           | -0.6                | 4.0  | 6.4  | 1.6 | -3.0                    | 5.1                            | 6.7  | 1.5 | -1.5  | 4.4  | 6.7  | 1.7 |
| PBE0            | -3.0                | 3.0  | 7.0  | 2.5 | -1.8                    | 2.5                            | 4.2  | 1.3 | -2.6  | 2.8  | 7.0  | 2.1 |
| mPW1PW          | -1.3                | 2.0  | 4.4  | 1.6 | 0.9                     | 1.9                            | 4.1  | 1.6 | -0.5  | 1.9  | 4.4  | 1.6 |
| mPW1K           | 1.6                 | 1.6  | 4.1  | 1.4 | -3.1                    | 3.1                            | 5.8  | 1.9 | -0.2  | 2.2  | 5.8  | 1.8 |
| S12H            | -2.0                | 2.4  | 5.7  | 2.0 | -1.1                    | 3.3                            | 4.5  | 0.9 | -1.7  | 2.7  | 5.7  | 1.7 |
| X3LYP           | 0.8                 | 1.8  | 2.4  | 0.5 | 7.8                     | 7.8                            | 10.3 | 2.7 | 3.4   | 4.0  | 10.3 | 3.3 |
|                 |                     |      |      |     |                         | <i>Meta-Hybrids</i>            |      |     |       |      |      |     |
| M06             | 0.1                 | 1.4  | 2.9  | 1.0 | 3.0                     | 3.2                            | 8.7  | 3.9 | 1.2   | 2.0  | 8.7  | 2.7 |
| M06-2X          | 0.3                 | 1.4  | 2.6  | 0.8 | 0.2                     | 0.9                            | 1.3  | 0.4 | 0.2   | 1.2  | 2.6  | 0.8 |
| M06-HF          | 0.0                 | 1.8  | 4.5  | 1.4 | -3.2                    | 4.1                            | 9.8  | 4.1 | -1.2  | 2.7  | 9.8  | 3.0 |
| TPSSH           | -2.8                | 2.8  | 4.8  | 1.5 | 4.4                     | 4.7                            | 8.5  | 3.3 | -0.1  | 3.5  | 8.5  | 2.5 |
|                 |                     |      |      |     |                         | <i>Double-Hybrids</i>          |      |     |       |      |      |     |
| B2K-PLYP        | -0.2                | 0.9  | 1.9  | 0.6 | 2.5                     | 3.1                            | 7.1  | 2.8 | 0.8   | 1.7  | 7.1  | 2.1 |
| B2T-PLYP        | 0.0                 | 0.8  | 1.7  | 0.5 | 4.5                     | 4.5                            | 9.2  | 3.3 | 1.7   | 2.2  | 9.2  | 2.7 |
| B2-PLYP         | -0.5                | 1.0  | 1.8  | 0.7 | 5.9                     | 5.9                            | 10.9 | 3.6 | 1.9   | 2.9  | 10.9 | 3.3 |
| LS1-TPSS        | -2.7                | 2.8  | 5.0  | 1.8 | -2.2                    | 4.5                            | 8.2  | 2.7 | -2.5  | 3.4  | 8.2  | 2.3 |
| mPW2K-PLYP      | -0.4                | 1.1  | 2.0  | 0.5 | 2.4                     | 3.2                            | 6.8  | 2.6 | 0.7   | 1.9  | 6.8  | 1.9 |
| mPW2-PLYP       | 0.2                 | 0.8  | 2.1  | 0.7 | 5.0                     | 5.0                            | 9.0  | 2.8 | 2.0   | 2.4  | 9.0  | 2.7 |
| PBE0-DH         | -1.5                | 1.9  | 4.0  | 1.3 | -4.2                    | 4.2                            | 8.4  | 3.0 | -2.5  | 2.8  | 8.4  | 2.4 |
| revDSD-BLYP     | -0.3                | 1.2  | 2.2  | 0.7 | 2.2                     | 3.3                            | 6.6  | 2.3 | 0.6   | 2.0  | 6.6  | 1.8 |
| revDSD-PBE      | -1.3                | 1.6  | 3.0  | 1.0 | 0.0                     | 3.4                            | 5.0  | 1.9 | -0.8  | 2.2  | 5.0  | 1.7 |
| revDSD-PBEP86   | 0.2                 | 0.8  | 1.5  | 0.4 | 1.8                     | 3.0                            | 7.0  | 2.9 | 0.8   | 1.6  | 7.0  | 2.1 |
|                 |                     |      |      |     |                         | <i>Range-Separated Hybrids</i> |      |     |       |      |      |     |
| CAM-B3LYP       | 2.6                 | 2.6  | 4.1  | 1.2 | 2.7                     | 2.7                            | 3.5  | 0.7 | 2.6   | 2.6  | 4.1  | 1.0 |
| CAMY-B3LYP      | 1.1                 | 1.4  | 2.5  | 0.9 | 3.7                     | 3.7                            | 4.8  | 0.9 | 2.1   | 2.3  | 4.8  | 1.4 |
| $\omega$ B97    | 3.8                 | 3.8  | 4.0  | 0.2 | -4.8                    | 4.8                            | 7.7  | 2.0 | 0.5   | 4.2  | 7.7  | 1.3 |
| $\omega$ B97X   | 2.9                 | 2.9  | 3.4  | 0.6 | -2.1                    | 2.1                            | 4.1  | 1.4 | 1.0   | 2.6  | 4.1  | 1.1 |
| $\omega$ B97X-D | 2.0                 | 2.0  | 4.0  | 1.7 | 1.0                     | 1.6                            | 3.4  | 1.3 | 1.6   | 1.8  | 4.0  | 1.5 |



**Table S18** (continued).

| XC           | $\Delta E^\ddagger$         |      |      |     | $\Delta E_{\text{rxn}}$ |      |      |     | Total |      |      |     |
|--------------|-----------------------------|------|------|-----|-------------------------|------|------|-----|-------|------|------|-----|
|              | ME                          | MAE  | MUE  | SD  | ME                      | MAE  | MUE  | SD  | ME    | MAE  | MUE  | SD  |
|              | <i>Dispersion-Corrected</i> |      |      |     |                         |      |      |     |       |      |      |     |
| BP86-D3(BJ)  | -9.1                        | 9.1  | 15.4 | 3.9 | 2.9                     | 2.9  | 6.6  | 2.6 | -4.6  | 6.8  | 15.4 | 4.6 |
| BLYP-D3(BJ)  | -5.5                        | 5.5  | 9.4  | 2.8 | 10.6                    | 10.6 | 14.2 | 3.4 | 0.5   | 7.4  | 14.2 | 3.9 |
| PBE-D3(BJ)   | -9.5                        | 9.5  | 16.5 | 4.1 | 1.2                     | 2.3  | 5.3  | 2.1 | -5.5  | 6.8  | 16.5 | 5.0 |
| OLYP-D3(BJ)  | -8.7                        | 8.7  | 13.7 | 3.7 | 1.6                     | 2.7  | 6.5  | 2.7 | -4.8  | 6.5  | 13.7 | 4.4 |
| OPBE-D3(BJ)  | -12.3                       | 12.3 | 19.9 | 5.1 | -6.8                    | 6.8  | 13.0 | 5.0 | -10.2 | 10.2 | 19.9 | 5.7 |
| B3LYP-D3(BJ) | -2.0                        | 2.5  | 4.2  | 1.1 | 5.9                     | 5.9  | 7.9  | 1.5 | 1.0   | 3.8  | 7.9  | 2.0 |
| PBE0-D3(BJ)  | -9.3                        | 9.3  | 16.2 | 4.1 | 1.5                     | 2.2  | 5.6  | 2.4 | -5.2  | 6.6  | 16.2 | 4.9 |
| M06-2X-D3    | 0.3                         | 1.4  | 2.5  | 0.9 | 0.0                     | 0.9  | 1.4  | 0.5 | 0.2   | 1.2  | 2.5  | 0.8 |

**Table S19.** Reaction barriers and reaction energies (kcal mol<sup>-1</sup>) for the various pericyclic reactions, computed with XC/QZ4P//BP86/DZ.

| XC              | Diels-Alder Reaction           |                         | 1,3-dipolar Cycloaddition |                         | Electrocyclic Rearrangement |                         | Sigmatropic Rearrangement |                         | Double Group Transfer |                         |  |
|-----------------|--------------------------------|-------------------------|---------------------------|-------------------------|-----------------------------|-------------------------|---------------------------|-------------------------|-----------------------|-------------------------|--|
|                 | $\Delta E^\ddagger$            | $\Delta E_{\text{rxn}}$ | $\Delta E^\ddagger$       | $\Delta E_{\text{rxn}}$ | $\Delta E^\ddagger$         | $\Delta E_{\text{rxn}}$ | $\Delta E^\ddagger$       | $\Delta E_{\text{rxn}}$ | $\Delta E^\ddagger$   | $\Delta E_{\text{rxn}}$ |  |
|                 | <i>LDA</i>                     |                         |                           |                         |                             |                         |                           |                         |                       |                         |  |
| VWN             | 0.9                            | -64.5                   | 3.6                       | -39.4                   | 36.8                        | 3.4                     | 22.2                      | 0.0                     | 22.3                  | 0.0                     |  |
|                 | <i>GGAs</i>                    |                         |                           |                         |                             |                         |                           |                         |                       |                         |  |
| BP86            | 15.0                           | -42.2                   | 15.3                      | -19.3                   | 39.8                        | 8.6                     | 28.3                      | 0.0                     | 38.2                  | 0.0                     |  |
| BLYP            | 20.9                           | -30.3                   | 18.8                      | -10.2                   | 42.7                        | 13.9                    | 31.7                      | 0.0                     | 45.2                  | 0.0                     |  |
| BEE             | 16.1                           | -43.0                   | 17.2                      | -18.5                   | 39.0                        | 6.7                     | 28.1                      | 0.0                     | 38.5                  | 0.0                     |  |
| PW91            | 12.4                           | -46.0                   | 13.3                      | -22.4                   | 39.4                        | 7.8                     | 27.9                      | 0.0                     | 35.9                  | 0.0                     |  |
| PBE             | 12.9                           | -46.1                   | 13.9                      | -22.1                   | 39.1                        | 7.1                     | 27.7                      | 0.0                     | 35.9                  | 0.0                     |  |
| PBEsol          | 6.8                            | -56.5                   | 9.2                       | -31.4                   | 37.0                        | 3.8                     | 24.2                      | 0.0                     | 28.6                  | 0.0                     |  |
| RPBE            | 18.7                           | -38.1                   | 19.0                      | -14.6                   | 40.0                        | 8.4                     | 29.8                      | 0.0                     | 41.7                  | 0.0                     |  |
| revPBE          | 18.4                           | -38.9                   | 18.9                      | -15.1                   | 39.8                        | 8.1                     | 29.4                      | 0.0                     | 41.3                  | 0.0                     |  |
| mPBE            | 14.4                           | -43.9                   | 15.2                      | -20.1                   | 39.4                        | 7.5                     | 28.3                      | 0.0                     | 37.5                  | 0.0                     |  |
| mPW             | 15.5                           | -41.8                   | 16.0                      | -18.4                   | 40.0                        | 8.6                     | 28.9                      | 0.0                     | 39.0                  | 0.0                     |  |
| HTBS            | 14.0                           | -46.9                   | 15.6                      | -22.5                   | 37.6                        | 5.1                     | 26.3                      | 0.0                     | 35.6                  | 0.0                     |  |
| OLYP            | 24.0                           | -35.7                   | 23.7                      | -12.0                   | 40.6                        | 7.6                     | 30.9                      | 0.0                     | 45.5                  | 0.0                     |  |
| OPBE            | 19.5                           | -48.0                   | 22.2                      | -20.2                   | 37.1                        | 0.9                     | 27.3                      | 0.0                     | 39.3                  | 0.0                     |  |
| XLYP            | 21.2                           | -29.0                   | 18.8                      | -9.4                    | 43.1                        | 14.7                    | 32.3                      | 0.0                     | 45.9                  | 0.0                     |  |
|                 | <i>Meta-GGAs</i>               |                         |                           |                         |                             |                         |                           |                         |                       |                         |  |
| M06-L           | 17.0                           | -45.6                   | 18.8                      | -15.4                   | 43.9                        | 6.8                     | 34.3                      | 0.0                     | 48.1                  | 0.0                     |  |
| MVS             | 13.0                           | -53.9                   | 18.3                      | -22.5                   | 43.0                        | 6.6                     | 28.8                      | 0.0                     | 37.1                  | 0.0                     |  |
| TPSS            | 15.6                           | -40.3                   | 15.7                      | -18.4                   | 40.3                        | 8.1                     | 31.0                      | 0.0                     | 43.0                  | 0.0                     |  |
| revTPSS         | 14.7                           | -42.3                   | 14.9                      | -21.1                   | 39.8                        | 6.6                     | 31.6                      | 0.0                     | 45.0                  | 0.0                     |  |
|                 | <i>Hybrids</i>                 |                         |                           |                         |                             |                         |                           |                         |                       |                         |  |
| B3LYP           | 22.7                           | -37.4                   | 21.1                      | -17.3                   | 45.1                        | 12.2                    | 35.2                      | 0.0                     | 49.7                  | 0.0                     |  |
| B3LYP*          | 20.7                           | -38.1                   | 19.4                      | -14.7                   | 44.0                        | 11.9                    | 33.6                      | 0.0                     | 46.8                  | 0.0                     |  |
| B1LYP           | 24.1                           | -37.1                   | 22.3                      | -17.6                   | 46.0                        | 12.5                    | 36.6                      | 0.0                     | 52.1                  | 0.0                     |  |
| B1PW91          | 19.8                           | -48.1                   | 20.9                      | -24.7                   | 42.8                        | 6.4                     | 33.4                      | 0.0                     | 46.4                  | 0.0                     |  |
| BHandH          | 13.4                           | -65.6                   | 14.8                      | -44.5                   | 44.9                        | 4.8                     | 34.8                      | 0.0                     | 43.0                  | 0.0                     |  |
| BHandHLYP       | 27.2                           | -44.1                   | 25.7                      | -25.4                   | 49.1                        | 11.1                    | 41.7                      | 0.0                     | 58.8                  | 0.0                     |  |
| KMLYP           | 19.8                           | -59.5                   | 20.5                      | -38.8                   | 47.2                        | 6.3                     | 38.7                      | 0.0                     | 50.7                  | 0.0                     |  |
| O3LYP           | -1.4                           | -74.6                   | 1.9                       | -49.2                   | 38.1                        | 1.7                     | 23.5                      | 0.0                     | 22.3                  | 0.0                     |  |
| OPBE0           | 21.6                           | -53.7                   | 24.5                      | -27.1                   | 40.6                        | 0.8                     | 32.2                      | 0.0                     | 45.7                  | 0.0                     |  |
| PBE0            | 16.8                           | -52.2                   | 18.2                      | -28.5                   | 42.3                        | 5.7                     | 32.6                      | 0.0                     | 43.3                  | 0.0                     |  |
| mPW1PW          | 18.9                           | -48.6                   | 19.9                      | -25.5                   | 43.1                        | 7.0                     | 33.6                      | 0.0                     | 45.9                  | 0.0                     |  |
| mPW1K           | 21.3                           | -53.5                   | 22.5                      | -30.8                   | 45.2                        | 5.7                     | 37.1                      | 0.0                     | 50.7                  | 0.0                     |  |
| S12H            | 16.6                           | -52.7                   | 19.0                      | -26.6                   | 43.2                        | 5.4                     | 34.5                      | 0.0                     | 44.5                  | 0.0                     |  |
| X3LYP           | 22.0                           | -38.9                   | 20.5                      | -19.0                   | 45.2                        | 12.0                    | 35.4                      | 0.0                     | 49.3                  | 0.0                     |  |
|                 | <i>Meta-Hybrids</i>            |                         |                           |                         |                             |                         |                           |                         |                       |                         |  |
| M06             | 19.6                           | -47.3                   | 21.4                      | -20.7                   | 43.8                        | 7.8                     | 35.3                      | 0.0                     | 48.6                  | 0.0                     |  |
| M06-2X          | 18.2                           | -48.5                   | 21.1                      | -27.6                   | 45.0                        | 8.5                     | 36.9                      | 0.0                     | 49.3                  | 0.0                     |  |
| M06-HF          | 14.5                           | -48.3                   | 19.5                      | -38.3                   | 43.4                        | 9.8                     | 38.1                      | 0.0                     | 51.0                  | 0.0                     |  |
| TPSSH           | 17.0                           | -43.1                   | 17.3                      | -21.2                   | 41.5                        | 7.4                     | 32.7                      | 0.0                     | 45.4                  | 0.0                     |  |
|                 | <i>Double-Hybrids</i>          |                         |                           |                         |                             |                         |                           |                         |                       |                         |  |
| B2K-PLYP        | 18.0                           | -53.2                   | 17.4                      | -22.3                   | 44.3                        | 9.2                     | 35.8                      | 0.0                     | 50.5                  | 0.0                     |  |
| B2T-PLYP        | 19.0                           | -48.7                   | 17.9                      | -20.1                   | 44.3                        | 10.1                    | 35.6                      | 0.0                     | 50.2                  | 0.0                     |  |
| B2-PLYP         | 19.0                           | -46.3                   | 17.7                      | -18.4                   | 43.9                        | 10.6                    | 34.9                      | 0.0                     | 49.3                  | 0.0                     |  |
| LS1-TPSS        | 13.8                           | -55.6                   | 15.3                      | -26.0                   | 42.2                        | 5.7                     | 33.9                      | 0.0                     | 47.2                  | 0.0                     |  |
| mPW2K-PLYP      | 17.7                           | -53.4                   | 17.0                      | -22.5                   | 44.4                        | 9.4                     | 35.9                      | 0.0                     | 50.3                  | 0.0                     |  |
| mPW2-PLYP       | 19.5                           | -47.0                   | 18.1                      | -20.2                   | 44.8                        | 10.8                    | 36.0                      | 0.0                     | 50.5                  | 0.0                     |  |
| PBE0-DH         | 17.2                           | -57.4                   | 18.7                      | -30.6                   | 43.2                        | 4.9                     | 34.6                      | 0.0                     | 46.7                  | 0.0                     |  |
| revDSD-BLYP     | 17.2                           | -52.9                   | 16.8                      | -22.3                   | 44.4                        | 9.6                     | 36.8                      | 0.0                     | 50.9                  | 0.0                     |  |
| revDSD-PBE      | 16.6                           | -55.3                   | 16.8                      | -23.9                   | 43.1                        | 7.3                     | 36.0                      | 0.0                     | 48.9                  | 0.0                     |  |
| revDSD-PBEP86   | 18.8                           | -52.6                   | 18.4                      | -21.8                   | 43.9                        | 8.2                     | 37.1                      | 0.0                     | 51.0                  | 0.0                     |  |
|                 | <i>Range-Separated Hybrids</i> |                         |                           |                         |                             |                         |                           |                         |                       |                         |  |
| CAM-B3LYP       | 23.8                           | -45.0                   | 21.7                      | -25.7                   | 46.4                        | 9.9                     | 37.7                      | 0.0                     | 52.0                  | 0.0                     |  |
| CAMY-B3LYP      | 21.8                           | -44.1                   | 20.2                      | -24.4                   | 45.7                        | 10.5                    | 36.5                      | 0.0                     | 50.0                  | 0.0                     |  |
| $\omega$ B97    | 23.6                           | -55.8                   | 22.2                      | -32.7                   | 46.9                        | 4.0                     | 40.9                      | 0.0                     | 53.6                  | 0.0                     |  |
| $\omega$ B97X   | 23.0                           | -51.9                   | 21.8                      | -30.0                   | 46.4                        | 6.2                     | 39.3                      | 0.0                     | 52.1                  | 0.0                     |  |
| $\omega$ B97X-D | 23.3                           | -47.3                   | 22.5                      | -25.9                   | 45.1                        | 7.0                     | 36.9                      | 0.0                     | 50.6                  | 0.0                     |  |

**Table S19 (continued).**

| XC           | Diels-Alder Reaction        |                         | 1,3-dipolar Cycloaddition |                         | Electrocyclic Rearrangement |                         | Sigmatropic Rearrangement |                         | Double Group Transfer |                         |
|--------------|-----------------------------|-------------------------|---------------------------|-------------------------|-----------------------------|-------------------------|---------------------------|-------------------------|-----------------------|-------------------------|
|              | $\Delta E^\ddagger$         | $\Delta E_{\text{rxn}}$ | $\Delta E^\ddagger$       | $\Delta E_{\text{rxn}}$ | $\Delta E^\ddagger$         | $\Delta E_{\text{rxn}}$ | $\Delta E^\ddagger$       | $\Delta E_{\text{rxn}}$ | $\Delta E^\ddagger$   | $\Delta E_{\text{rxn}}$ |
|              | <i>Dispersion-Corrected</i> |                         |                           |                         |                             |                         |                           |                         |                       |                         |
| BP86-D3(BJ)  | 8.6                         | -47.0                   | 11.2                      | -23.1                   | 39.5                        | 8.7                     | 27.7                      | 0.0                     | 34.8                  | 0.0                     |
| BLYP-D3(BJ)  | 13.1                        | -36.6                   | 13.5                      | -15.3                   | 42.2                        | 14.0                    | 30.8                      | 0.0                     | 40.9                  | 0.0                     |
| PBE-D3(BJ)   | 9.0                         | -49.3                   | 11.3                      | -24.6                   | 38.9                        | 7.2                     | 27.3                      | 0.0                     | 33.7                  | 0.0                     |
| OLYP-D3(BJ)  | 7.9                         | -49.9                   | 12.6                      | -23.6                   | 39.1                        | 7.4                     | 27.5                      | 0.0                     | 36.2                  | 0.0                     |
| OPBE-D3(BJ)  | 3.5                         | -61.7                   | 11.3                      | -31.3                   | 35.7                        | 0.7                     | 24.3                      | 0.0                     | 30.2                  | 0.0                     |
| B3LYP-D3(BJ) | 16.3                        | -42.6                   | 16.8                      | -21.4                   | 44.7                        | 12.3                    | 34.5                      | 0.0                     | 46.1                  | 0.0                     |
| PBE0-D3(BJ)  | 9.4                         | -48.9                   | 11.6                      | -24.3                   | 39.0                        | 7.2                     | 27.4                      | 0.0                     | 33.9                  | 0.0                     |
| M06-2X-D3    | 18.1                        | -48.5                   | 21.0                      | -27.6                   | 45.0                        | 8.5                     | 37.0                      | 0.0                     | 49.2                  | 0.0                     |

**Table S20.** Errors in reaction barriers and reaction energies (kcal mol<sup>-1</sup>) for the various pericyclic reactions, computed with XC/QZ4P//BP86/DZ, compared to CCSDT(Q)/CBS//CCSD(T)/cc-pVTZ.

| XC              | Diels-Alder Reaction           |                         | 1,3-dipolar Cycloaddition |                         | Electrocyclic Rearrangement |                         | Sigmatropic Rearrangement |                         | Double Group Transfer |                         |  |
|-----------------|--------------------------------|-------------------------|---------------------------|-------------------------|-----------------------------|-------------------------|---------------------------|-------------------------|-----------------------|-------------------------|--|
|                 | $\Delta E^\ddagger$            | $\Delta E_{\text{rxn}}$ | $\Delta E^\ddagger$       | $\Delta E_{\text{rxn}}$ | $\Delta E^\ddagger$         | $\Delta E_{\text{rxn}}$ | $\Delta E^\ddagger$       | $\Delta E_{\text{rxn}}$ | $\Delta E^\ddagger$   | $\Delta E_{\text{rxn}}$ |  |
|                 | <i>LDA</i>                     |                         |                           |                         |                             |                         |                           |                         |                       |                         |  |
| VWN             | -18.7                          | -16.9                   | -14.7                     | -10.5                   | -6.6                        | -5.1                    | -14.6                     | 0.0                     | -27.9                 | 0.0                     |  |
|                 | <i>GGAs</i>                    |                         |                           |                         |                             |                         |                           |                         |                       |                         |  |
| BP86            | -4.6                           | 5.5                     | -3.0                      | 9.6                     | -3.6                        | 0.2                     | -8.5                      | 0.0                     | -12.0                 | 0.0                     |  |
| BLYP            | 1.3                            | 17.4                    | 0.5                       | 18.7                    | -0.7                        | 5.5                     | -5.1                      | 0.0                     | -5.0                  | 0.0                     |  |
| BEE             | -3.5                           | 4.7                     | -1.1                      | 10.4                    | -4.4                        | -1.8                    | -8.7                      | 0.0                     | -11.7                 | 0.0                     |  |
| PW91            | -7.2                           | 1.7                     | -5.0                      | 6.5                     | -4.0                        | -0.6                    | -8.9                      | 0.0                     | -14.3                 | 0.0                     |  |
| PBE             | -6.7                           | 1.6                     | -4.4                      | 6.8                     | -4.3                        | -1.4                    | -9.1                      | 0.0                     | -14.3                 | 0.0                     |  |
| PBESol          | -12.8                          | -8.9                    | -9.1                      | -2.5                    | -6.4                        | -4.7                    | -12.6                     | 0.0                     | -21.6                 | 0.0                     |  |
| RPBE            | -0.9                           | 9.6                     | 0.7                       | 14.3                    | -3.4                        | 0.0                     | -7.0                      | 0.0                     | -8.5                  | 0.0                     |  |
| revPBE          | -1.2                           | 8.8                     | 0.6                       | 13.8                    | -3.6                        | -0.4                    | -7.4                      | 0.0                     | -8.9                  | 0.0                     |  |
| mPBE            | -5.2                           | 3.8                     | -3.1                      | 8.8                     | -4.0                        | -0.9                    | -8.5                      | 0.0                     | -12.7                 | 0.0                     |  |
| mPW             | -4.1                           | 5.9                     | -2.3                      | 10.5                    | -3.4                        | 0.2                     | -7.9                      | 0.0                     | -11.2                 | 0.0                     |  |
| HTBS            | -5.6                           | 0.8                     | -2.7                      | 6.4                     | -5.8                        | -3.4                    | -10.5                     | 0.0                     | -14.6                 | 0.0                     |  |
| OLYP            | 4.4                            | 12.0                    | 5.4                       | 16.9                    | -2.8                        | -0.9                    | -5.9                      | 0.0                     | -4.7                  | 0.0                     |  |
| OPBE            | -0.1                           | -0.4                    | 3.9                       | 8.7                     | -6.3                        | -7.6                    | -9.5                      | 0.0                     | -10.9                 | 0.0                     |  |
| XLYP            | 1.6                            | 18.7                    | 0.5                       | 19.5                    | -0.3                        | 6.3                     | -4.5                      | 0.0                     | -4.3                  | 0.0                     |  |
|                 | <i>Meta-GGAs</i>               |                         |                           |                         |                             |                         |                           |                         |                       |                         |  |
| M06-L           | -2.6                           | 2.1                     | 0.5                       | 13.5                    | 0.5                         | -1.7                    | -2.5                      | 0.0                     | -2.1                  | 0.0                     |  |
| MVS             | -6.6                           | -6.3                    | 0.0                       | 6.4                     | -0.4                        | -1.9                    | -8.0                      | 0.0                     | -13.1                 | 0.0                     |  |
| TPSS            | -4.0                           | 7.4                     | -2.6                      | 10.5                    | -3.1                        | -0.4                    | -5.8                      | 0.0                     | -7.2                  | 0.0                     |  |
| revTPSS         | -4.9                           | 5.4                     | -3.4                      | 7.8                     | -3.6                        | -1.9                    | -5.2                      | 0.0                     | -5.2                  | 0.0                     |  |
|                 | <i>Hybrids</i>                 |                         |                           |                         |                             |                         |                           |                         |                       |                         |  |
| B3LYP           | 3.1                            | 10.3                    | 2.8                       | 11.6                    | 1.7                         | 3.8                     | -1.6                      | 0.0                     | -0.5                  | 0.0                     |  |
| B3LYP*          | 1.1                            | 9.6                     | 1.1                       | 14.2                    | 0.6                         | 3.5                     | -3.2                      | 0.0                     | -3.4                  | 0.0                     |  |
| B1LYP           | 4.5                            | 10.6                    | 4.0                       | 11.3                    | 2.6                         | 4.1                     | -0.2                      | 0.0                     | 1.9                   | 0.0                     |  |
| B1PW91          | 0.2                            | -0.5                    | 2.6                       | 4.2                     | -0.6                        | -2.1                    | -3.4                      | 0.0                     | -3.8                  | 0.0                     |  |
| BHandH          | -6.2                           | -18.0                   | -3.5                      | -15.6                   | 1.5                         | -3.7                    | -2.0                      | 0.0                     | -7.2                  | 0.0                     |  |
| BHandHLYP       | 7.6                            | 3.6                     | 7.4                       | 3.5                     | 5.7                         | 2.7                     | 4.9                       | 0.0                     | 8.6                   | 0.0                     |  |
| KMLYP           | 0.2                            | -11.9                   | 2.2                       | -9.9                    | 3.8                         | -2.2                    | 1.9                       | 0.0                     | 0.5                   | 0.0                     |  |
| O3LYP           | -21.0                          | -27.0                   | -16.4                     | -20.3                   | -5.3                        | -6.8                    | -13.3                     | 0.0                     | -27.9                 | 0.0                     |  |
| OPBE0           | 2.0                            | -6.1                    | 6.2                       | 1.8                     | -2.8                        | -7.7                    | -4.6                      | 0.0                     | -4.5                  | 0.0                     |  |
| PBE0            | -2.8                           | -4.6                    | -0.1                      | 0.4                     | -1.1                        | -2.8                    | -4.2                      | 0.0                     | -6.9                  | 0.0                     |  |
| mPW1PW          | -0.7                           | -1.0                    | 1.6                       | 3.4                     | -0.3                        | -1.5                    | -3.2                      | 0.0                     | -4.3                  | 0.0                     |  |
| mPW1K           | 1.7                            | -5.9                    | 4.2                       | -1.9                    | 1.8                         | -2.8                    | 0.3                       | 0.0                     | 0.5                   | 0.0                     |  |
| S12H            | -3.0                           | -5.1                    | 0.7                       | 2.3                     | -0.2                        | -3.1                    | -2.3                      | 0.0                     | -5.7                  | 0.0                     |  |
| X3LYP           | 2.4                            | 8.8                     | 2.2                       | 9.9                     | 1.8                         | 3.6                     | -1.4                      | 0.0                     | -0.9                  | 0.0                     |  |
|                 | <i>Meta-Hybrids</i>            |                         |                           |                         |                             |                         |                           |                         |                       |                         |  |
| M06             | 0.0                            | 0.4                     | 3.1                       | 8.2                     | 0.4                         | -0.6                    | -1.5                      | 0.0                     | -1.6                  | 0.0                     |  |
| M06-2X          | -1.4                           | -0.9                    | 2.8                       | 1.3                     | 1.6                         | 0.1                     | 0.1                       | 0.0                     | -0.9                  | 0.0                     |  |
| M06-HF          | -5.1                           | -0.6                    | 1.2                       | -9.4                    | 0.0                         | 1.4                     | 1.3                       | 0.0                     | 0.8                   | 0.0                     |  |
| TPSSH           | -2.6                           | 4.6                     | -1.0                      | 7.7                     | -1.9                        | -1.1                    | -4.1                      | 0.0                     | -4.8                  | 0.0                     |  |
|                 | <i>Double-Hybrids</i>          |                         |                           |                         |                             |                         |                           |                         |                       |                         |  |
| B2K-PLYP        | -1.6                           | -5.6                    | -0.9                      | 6.6                     | 0.9                         | 0.8                     | -1.0                      | 0.0                     | 0.3                   | 0.0                     |  |
| B2T-PLYP        | -0.6                           | -1.1                    | -0.4                      | 8.8                     | 0.9                         | 1.7                     | -1.2                      | 0.0                     | 0.0                   | 0.0                     |  |
| B2-PLYP         | -0.6                           | 1.4                     | -0.6                      | 10.5                    | 0.5                         | 2.2                     | -1.9                      | 0.0                     | -0.9                  | 0.0                     |  |
| LS1-TPSS        | -5.8                           | -8.0                    | -3.0                      | 2.9                     | -1.2                        | -2.8                    | -2.9                      | 0.0                     | -3.0                  | 0.0                     |  |
| mPW2K-PLYP      | -1.9                           | -5.8                    | -1.3                      | 6.4                     | 1.0                         | 1.0                     | -0.9                      | 0.0                     | 0.1                   | 0.0                     |  |
| mPW2-PLYP       | -0.1                           | 0.6                     | -0.2                      | 8.7                     | 1.4                         | 2.4                     | -0.8                      | 0.0                     | 0.3                   | 0.0                     |  |
| PBE0-DH         | -2.4                           | -9.8                    | 0.4                       | -1.7                    | -0.2                        | -3.6                    | -2.2                      | 0.0                     | -3.5                  | 0.0                     |  |
| revDSD-BLYP     | -2.4                           | -5.3                    | -1.5                      | 6.6                     | 1.0                         | 1.2                     | 0.0                       | 0.0                     | 0.7                   | 0.0                     |  |
| revDSD-PBE      | -3.0                           | -7.7                    | -1.5                      | 5.0                     | -0.3                        | -1.2                    | -0.8                      | 0.0                     | -1.3                  | 0.0                     |  |
| revDSD-PBEP86   | -0.8                           | -5.0                    | 0.1                       | 7.1                     | 0.5                         | -0.3                    | 0.3                       | 0.0                     | 0.8                   | 0.0                     |  |
|                 | <i>Range-Separated Hybrids</i> |                         |                           |                         |                             |                         |                           |                         |                       |                         |  |
| CAM-B3LYP       | 4.2                            | 2.7                     | 3.4                       | 3.2                     | 3.0                         | 1.5                     | 0.9                       | 0.0                     | 1.8                   | 0.0                     |  |
| CAMY-B3LYP      | 2.2                            | 3.6                     | 1.9                       | 4.5                     | 2.3                         | 2.1                     | -0.3                      | 0.0                     | -0.2                  | 0.0                     |  |
| $\omega$ B97    | 4.0                            | -8.2                    | 3.9                       | -3.8                    | 3.5                         | -4.5                    | 4.1                       | 0.0                     | 3.4                   | 0.0                     |  |
| $\omega$ B97X   | 3.4                            | -4.3                    | 3.5                       | -1.1                    | 3.0                         | -2.3                    | 2.5                       | 0.0                     | 1.9                   | 0.0                     |  |
| $\omega$ B97X-D | 3.7                            | 0.4                     | 4.2                       | 3.0                     | 1.7                         | -1.5                    | 0.1                       | 0.0                     | 0.4                   | 0.0                     |  |

**Table S20** (continued).

| XC           | Diels-Alder<br>Reaction |                         | 1,3-dipolar<br>Cycloaddition |                         | Electrocyclic<br>Rearrangement |                         | Sigmatropic<br>Rearrangement |                         | Double Group<br>Transfer |                         |
|--------------|-------------------------|-------------------------|------------------------------|-------------------------|--------------------------------|-------------------------|------------------------------|-------------------------|--------------------------|-------------------------|
|              | $\Delta E^\ddagger$     | $\Delta E_{\text{rxn}}$ | $\Delta E^\ddagger$          | $\Delta E_{\text{rxn}}$ | $\Delta E^\ddagger$            | $\Delta E_{\text{rxn}}$ | $\Delta E^\ddagger$          | $\Delta E_{\text{rxn}}$ | $\Delta E^\ddagger$      | $\Delta E_{\text{rxn}}$ |
|              |                         |                         |                              |                         | <i>Dispersion-Corrected</i>    |                         |                              |                         |                          |                         |
| BP86-D3(BJ)  | -11.0                   | 0.6                     | -7.1                         | 5.8                     | -3.9                           | 0.3                     | -9.1                         | 0.0                     | -15.4                    | 0.0                     |
| BLYP-D3(BJ)  | -6.5                    | 11.1                    | -4.8                         | 13.6                    | -1.2                           | 5.6                     | -6.0                         | 0.0                     | -9.3                     | 0.0                     |
| PBE-D3(BJ)   | -10.6                   | -1.7                    | -7.0                         | 4.3                     | -4.5                           | -1.3                    | -9.5                         | 0.0                     | -16.5                    | 0.0                     |
| OLYP-D3(BJ)  | -11.7                   | -2.3                    | -5.7                         | 5.3                     | -4.3                           | -1.1                    | -9.3                         | 0.0                     | -14.0                    | 0.0                     |
| OPBE-D3(BJ)  | -16.1                   | -14.1                   | -7.0                         | -2.4                    | -7.7                           | -7.8                    | -12.5                        | 0.0                     | -20.0                    | 0.0                     |
| B3LYP-D3(BJ) | -3.3                    | 5.1                     | -1.5                         | 7.5                     | 1.3                            | 3.9                     | -2.3                         | 0.0                     | -4.1                     | 0.0                     |
| PBE0-D3(BJ)  | -10.2                   | -1.3                    | -6.7                         | 4.6                     | -4.4                           | -1.3                    | -9.4                         | 0.0                     | -16.3                    | 0.0                     |
| M06-2X-D3    | -1.5                    | -0.9                    | 2.7                          | 1.3                     | 1.6                            | 0.1                     | 0.2                          | 0.0                     | -1.0                     | 0.0                     |

**Table S21.** Mean error (ME), mean absolute error (MAE), maximum unsigned error (MUE) and standard deviation (SD) of reaction barriers and energies (kcal mol<sup>-1</sup>) for the various pericyclic reactions, computed with XC/QZ4P//BP86/DZ compared to CCSDT(Q)/CBS//CCSD(T)/cc-pVTZ.

| XC              | $\Delta E^\ddagger$ |      |      |     | $\Delta E_{\text{rxn}}$ |                                |      |     | Total |      |      |     |
|-----------------|---------------------|------|------|-----|-------------------------|--------------------------------|------|-----|-------|------|------|-----|
|                 | ME                  | MAE  | MUE  | SD  | ME                      | MAE                            | MUE  | SD  | ME    | MAE  | MUE  | SD  |
| VWN             | -16.5               | 16.5 | 27.9 | 6.9 | -10.8                   | 10.8                           | 16.9 | 4.8 | -14.4 | 14.4 | 27.9 | 6.8 |
|                 |                     |      |      |     |                         | <i>LDA</i>                     |      |     |       |      |      |     |
|                 |                     |      |      |     |                         | <i>GGAs</i>                    |      |     |       |      |      |     |
| BP86            | -6.3                | 6.3  | 12.0 | 3.4 | 5.1                     | 5.1                            | 9.6  | 3.9 | -2.1  | 5.9  | 12.0 | 3.6 |
| BLYP            | -1.8                | 2.5  | 5.1  | 2.1 | 13.8                    | 13.8                           | 18.7 | 5.9 | 4.1   | 6.8  | 18.7 | 6.8 |
| BEE             | -5.9                | 5.9  | 11.7 | 3.8 | 4.4                     | 5.6                            | 10.4 | 3.6 | -2.0  | 5.8  | 11.7 | 3.7 |
| PW91            | -7.9                | 7.9  | 14.3 | 3.6 | 2.5                     | 2.9                            | 6.5  | 2.5 | -4.0  | 6.0  | 14.3 | 4.1 |
| PBE             | -7.8                | 7.8  | 14.3 | 3.7 | 2.3                     | 3.2                            | 6.8  | 2.5 | -4.0  | 6.1  | 14.3 | 4.0 |
| PBEsol          | -12.5               | 12.5 | 21.6 | 5.1 | -5.3                    | 5.3                            | 8.9  | 2.6 | -9.8  | 9.8  | 21.6 | 5.6 |
| RPBE            | -3.8                | 4.1  | 8.5  | 3.2 | 7.9                     | 8.0                            | 14.3 | 5.9 | 0.6   | 5.5  | 14.3 | 4.8 |
| revPBE          | -4.1                | 4.3  | 8.9  | 3.3 | 7.4                     | 7.6                            | 13.8 | 5.5 | 0.2   | 5.6  | 13.8 | 4.6 |
| mPBE            | -6.7                | 6.7  | 12.7 | 3.5 | 3.9                     | 4.5                            | 8.8  | 3.2 | -2.7  | 5.9  | 12.7 | 3.6 |
| mPW             | -5.8                | 5.8  | 11.2 | 3.3 | 5.5                     | 5.5                            | 10.5 | 4.2 | -1.6  | 5.7  | 11.2 | 3.7 |
| HTBS            | -7.8                | 7.8  | 14.6 | 4.2 | 1.3                     | 3.5                            | 6.4  | 2.3 | -4.4  | 6.2  | 14.6 | 4.2 |
| OLYP            | -0.7                | 4.7  | 5.9  | 1.0 | 9.3                     | 9.9                            | 16.9 | 6.7 | 3.0   | 6.6  | 16.9 | 4.9 |
| OPBE            | -4.6                | 6.1  | 10.9 | 3.9 | 0.3                     | 5.5                            | 8.7  | 3.7 | -2.8  | 5.9  | 10.9 | 3.8 |
| XLYP            | -1.4                | 2.3  | 4.5  | 1.8 | 14.8                    | 14.8                           | 19.5 | 6.0 | 4.7   | 7.0  | 19.5 | 7.2 |
|                 |                     |      |      |     |                         | <i>Meta-GGAs</i>               |      |     |       |      |      |     |
| M06-L           | -1.2                | 1.6  | 2.6  | 0.9 | 4.6                     | 5.7                            | 13.5 | 5.5 | 1.0   | 3.2  | 13.5 | 4.0 |
| MVS             | -5.6                | 5.6  | 13.1 | 4.9 | -0.6                    | 4.8                            | 6.4  | 2.1 | -3.7  | 5.3  | 13.1 | 4.1 |
| TPSS            | -4.5                | 4.5  | 7.2  | 1.7 | 5.8                     | 6.1                            | 10.5 | 4.2 | -0.7  | 5.1  | 10.5 | 3.0 |
| revTPSS         | -4.5                | 4.5  | 5.2  | 0.8 | 3.8                     | 5.0                            | 7.8  | 2.4 | -1.4  | 4.7  | 7.8  | 1.6 |
|                 |                     |      |      |     |                         | <i>Hybrids</i>                 |      |     |       |      |      |     |
| B3LYP           | 1.1                 | 1.9  | 3.1  | 0.9 | 8.5                     | 8.5                            | 11.6 | 3.4 | 3.9   | 4.4  | 11.6 | 3.9 |
| B3LYP*          | -0.8                | 1.9  | 3.4  | 1.2 | 9.1                     | 9.1                            | 14.2 | 4.4 | 2.9   | 4.6  | 14.2 | 4.5 |
| B1LYP           | 2.6                 | 2.6  | 4.5  | 1.6 | 8.6                     | 8.6                            | 11.3 | 3.2 | 4.8   | 4.9  | 11.3 | 3.7 |
| B1PW91          | -1.0                | 2.1  | 3.8  | 1.4 | 0.6                     | 2.2                            | 4.2  | 1.5 | -0.4  | 2.2  | 4.2  | 1.5 |
| BHandH          | -3.5                | 4.1  | 7.2  | 2.3 | -12.4                   | 12.4                           | 18.0 | 6.3 | -6.8  | 7.2  | 18.0 | 5.9 |
| BHandHLYP       | 6.8                 | 6.8  | 8.6  | 1.3 | 3.2                     | 3.2                            | 3.6  | 0.4 | 5.5   | 5.5  | 8.6  | 2.1 |
| KMLYP           | 1.7                 | 1.7  | 3.8  | 1.3 | -8.0                    | 8.0                            | 11.9 | 4.2 | -1.9  | 4.1  | 11.9 | 4.1 |
| O3LYP           | -16.8               | 16.8 | 27.9 | 7.5 | -18.0                   | 18.0                           | 27.0 | 8.4 | -17.2 | 17.2 | 27.9 | 7.9 |
| OPBE0           | -0.7                | 4.0  | 6.2  | 1.5 | -4.0                    | 5.2                            | 7.7  | 2.5 | -2.0  | 4.5  | 7.7  | 2.0 |
| PBE0            | -3.0                | 3.0  | 6.9  | 2.4 | -2.3                    | 2.6                            | 4.6  | 1.7 | -2.8  | 2.8  | 6.9  | 2.2 |
| mPW1PW          | -1.4                | 2.0  | 4.3  | 1.5 | 0.3                     | 1.9                            | 3.4  | 1.0 | -0.7  | 2.0  | 4.3  | 1.4 |
| mPW1K           | 1.7                 | 1.7  | 4.2  | 1.4 | -3.5                    | 3.5                            | 5.9  | 1.7 | -0.3  | 2.4  | 5.9  | 1.7 |
| S12H            | -2.1                | 2.4  | 5.7  | 1.9 | -1.9                    | 3.5                            | 5.1  | 1.2 | -2.0  | 2.8  | 5.7  | 1.8 |
| X3LYP           | 0.8                 | 1.7  | 2.4  | 0.5 | 7.4                     | 7.4                            | 9.9  | 2.8 | 3.3   | 3.9  | 9.9  | 3.2 |
|                 |                     |      |      |     |                         | <i>Meta-Hybrids</i>            |      |     |       |      |      |     |
| M06             | 0.1                 | 1.3  | 3.1  | 1.1 | 2.6                     | 3.1                            | 8.2  | 3.6 | 1.0   | 2.0  | 8.2  | 2.5 |
| M06-2X          | 0.4                 | 1.4  | 2.8  | 0.9 | 0.2                     | 0.7                            | 1.3  | 0.5 | 0.3   | 1.1  | 2.8  | 0.8 |
| M06-HF          | -0.4                | 1.7  | 5.1  | 1.7 | -2.9                    | 3.8                            | 9.4  | 4.0 | -1.3  | 2.5  | 9.4  | 3.0 |
| TPSSH           | -2.9                | 2.9  | 4.8  | 1.4 | 3.7                     | 4.4                            | 7.7  | 2.7 | -0.4  | 3.5  | 7.7  | 2.1 |
|                 |                     |      |      |     |                         | <i>Double-Hybrids</i>          |      |     |       |      |      |     |
| B2K-PLYP        | -0.5                | 0.9  | 1.6  | 0.4 | 0.6                     | 4.3                            | 6.6  | 2.5 | -0.1  | 2.2  | 6.6  | 2.3 |
| B2T-PLYP        | -0.3                | 0.6  | 1.2  | 0.4 | 3.1                     | 3.8                            | 8.8  | 3.5 | 1.0   | 1.8  | 8.8  | 2.7 |
| B2-PLYP         | -0.7                | 0.9  | 1.9  | 0.5 | 4.7                     | 4.7                            | 10.5 | 4.1 | 1.3   | 2.3  | 10.5 | 3.1 |
| LS1-TPSS        | -3.2                | 3.2  | 5.8  | 1.5 | -2.6                    | 4.5                            | 8.0  | 2.4 | -3.0  | 3.7  | 8.0  | 2.0 |
| mPW2K-PLYP      | -0.6                | 1.0  | 1.9  | 0.6 | 0.5                     | 4.4                            | 6.4  | 2.4 | -0.2  | 2.3  | 6.4  | 2.2 |
| mPW2-PLYP       | 0.1                 | 0.5  | 1.4  | 0.5 | 3.9                     | 3.9                            | 8.7  | 3.4 | 1.5   | 1.8  | 8.7  | 2.7 |
| PBE0-DH         | -1.6                | 1.7  | 3.5  | 1.2 | -5.0                    | 5.0                            | 9.8  | 3.4 | -2.9  | 3.0  | 9.8  | 2.8 |
| revDSD-BLYP     | -0.4                | 1.1  | 2.4  | 0.8 | 0.8                     | 4.3                            | 6.6  | 2.3 | 0.0   | 2.3  | 6.6  | 2.2 |
| revDSD-PBE      | -1.4                | 1.4  | 3.0  | 0.9 | -1.3                    | 4.6                            | 7.7  | 2.7 | -1.3  | 2.6  | 7.7  | 2.4 |
| revDSD-PBEP86   | 0.2                 | 0.5  | 0.8  | 0.3 | 0.6                     | 4.1                            | 7.1  | 2.8 | 0.3   | 1.8  | 7.1  | 2.5 |
|                 |                     |      |      |     |                         | <i>Range-Separated Hybrids</i> |      |     |       |      |      |     |
| CAM-B3LYP       | 2.7                 | 2.7  | 4.2  | 1.2 | 2.4                     | 2.4                            | 3.2  | 0.7 | 2.6   | 2.6  | 4.2  | 1.0 |
| CAMY-B3LYP      | 1.2                 | 1.4  | 2.3  | 0.9 | 3.4                     | 3.4                            | 4.5  | 1.0 | 2.0   | 2.1  | 4.5  | 1.3 |
| $\omega$ B97    | 3.8                 | 3.8  | 4.1  | 0.3 | -5.5                    | 5.5                            | 8.2  | 1.9 | 0.3   | 4.4  | 8.2  | 1.4 |
| $\omega$ B97X   | 2.9                 | 2.9  | 3.5  | 0.6 | -2.5                    | 2.5                            | 4.3  | 1.3 | 0.8   | 2.7  | 4.3  | 0.9 |
| $\omega$ B97X-D | 2.0                 | 2.0  | 4.2  | 1.7 | 0.6                     | 1.6                            | 3.0  | 1.1 | 1.5   | 1.9  | 4.2  | 1.5 |

**Table S21** (continued).

| XC           | $\Delta E^\ddagger$         |      |      |     | $\Delta E_{\text{rxn}}$ |      |      |     | Total |      |      |     |
|--------------|-----------------------------|------|------|-----|-------------------------|------|------|-----|-------|------|------|-----|
|              | ME                          | MAE  | MUE  | SD  | ME                      | MAE  | MUE  | SD  | ME    | MAE  | MUE  | SD  |
|              | <i>Dispersion-Corrected</i> |      |      |     |                         |      |      |     |       |      |      |     |
| BP86-D3(BJ)  | -9.3                        | 9.3  | 15.4 | 3.8 | 2.2                     | 2.2  | 5.8  | 2.5 | -5.0  | 6.6  | 15.4 | 4.8 |
| BLYP-D3(BJ)  | -5.6                        | 5.6  | 9.3  | 2.6 | 10.1                    | 10.1 | 13.6 | 3.3 | 0.3   | 7.2  | 13.6 | 3.6 |
| PBE-D3(BJ)   | -9.6                        | 9.6  | 16.5 | 4.0 | 0.5                     | 2.4  | 4.3  | 1.3 | -5.8  | 6.9  | 16.5 | 4.8 |
| OLYP-D3(BJ)  | -9.0                        | 9.0  | 14.0 | 3.6 | 0.7                     | 2.9  | 5.3  | 1.8 | -5.4  | 6.7  | 14.0 | 4.3 |
| OPBE-D3(BJ)  | -12.7                       | 12.7 | 20.0 | 4.9 | -8.1                    | 8.1  | 14.1 | 4.7 | -10.9 | 10.9 | 20.0 | 5.4 |
| B3LYP-D3(BJ) | -2.0                        | 2.5  | 4.1  | 1.1 | 5.5                     | 5.5  | 7.5  | 1.5 | 0.8   | 3.6  | 7.5  | 1.9 |
| PBE0-D3(BJ)  | -9.4                        | 9.4  | 16.3 | 4.0 | 0.7                     | 2.4  | 4.6  | 1.6 | -5.6  | 6.8  | 16.3 | 4.8 |
| M06-2X-D3    | 0.4                         | 1.4  | 2.7  | 0.8 | 0.2                     | 0.7  | 1.3  | 0.5 | 0.3   | 1.1  | 2.7  | 0.8 |

**Table S22.** Reaction barriers and reaction energies (kcal mol<sup>-1</sup>) for the various pericyclic reactions, computed with XC/TZ2P//BP86/DZP.

| XC              | Diels-Alder Reaction           |                         | 1,3-dipolar Cycloaddition |                         | Electrocyclic Rearrangement |                         | Sigmatropic Rearrangement |                         | Double Group Transfer |                         |
|-----------------|--------------------------------|-------------------------|---------------------------|-------------------------|-----------------------------|-------------------------|---------------------------|-------------------------|-----------------------|-------------------------|
|                 | $\Delta E^\ddagger$            | $\Delta E_{\text{rxn}}$ | $\Delta E^\ddagger$       | $\Delta E_{\text{rxn}}$ | $\Delta E^\ddagger$         | $\Delta E_{\text{rxn}}$ | $\Delta E^\ddagger$       | $\Delta E_{\text{rxn}}$ | $\Delta E^\ddagger$   | $\Delta E_{\text{rxn}}$ |
|                 | <i>LDA</i>                     |                         |                           |                         |                             |                         |                           |                         |                       |                         |
| VWN             | 0.9                            | -64.6                   | 3.3                       | -41.3                   | 36.6                        | 2.9                     | 21.9                      | 0.0                     | 22.0                  | 0.0                     |
|                 | <i>GGAs</i>                    |                         |                           |                         |                             |                         |                           |                         |                       |                         |
| BP86            | 15.2                           | -41.6                   | 15.5                      | -20.1                   | 39.9                        | 8.8                     | 28.2                      | 0.0                     | 38.1                  | 0.0                     |
| BLYP            | 21.2                           | -29.6                   | 19.4                      | -10.6                   | 42.9                        | 14.3                    | 31.8                      | 0.0                     | 45.3                  | 0.0                     |
| BEE             | 16.3                           | -42.3                   | 17.4                      | -19.0                   | 39.3                        | 7.0                     | 28.1                      | 0.0                     | 38.5                  | 0.0                     |
| PW91            | 12.5                           | -45.6                   | 13.5                      | -23.2                   | 39.6                        | 8.0                     | 27.8                      | 0.0                     | 35.8                  | 0.0                     |
| PBE             | 13.0                           | -45.6                   | 14.1                      | -22.9                   | 39.3                        | 7.3                     | 27.6                      | 0.0                     | 35.9                  | 0.0                     |
| PBEsol          | 6.8                            | -56.2                   | 9.0                       | -32.7                   | 37.1                        | 3.8                     | 24.0                      | 0.0                     | 28.4                  | 0.0                     |
| RPBE            | 19.0                           | -37.3                   | 19.4                      | -14.9                   | 40.3                        | 8.9                     | 29.9                      | 0.0                     | 41.8                  | 0.0                     |
| revPBE          | 18.6                           | -38.1                   | 19.3                      | -15.5                   | 40.1                        | 8.5                     | 29.4                      | 0.0                     | 41.3                  | 0.0                     |
| mPBE            | 14.6                           | -43.3                   | 15.5                      | -20.7                   | 39.6                        | 7.8                     | 28.3                      | 0.0                     | 37.5                  | 0.0                     |
| mPW             | 15.7                           | -41.2                   | 16.3                      | -18.9                   | 40.2                        | 8.9                     | 28.8                      | 0.0                     | 39.0                  | 0.0                     |
| HTBS            | 14.1                           | -46.4                   | 15.8                      | -23.0                   | 37.9                        | 5.3                     | 26.1                      | 0.0                     | 35.5                  | 0.0                     |
| OLYP            | 24.2                           | -35.1                   | 24.3                      | -12.5                   | 40.9                        | 8.0                     | 30.9                      | 0.0                     | 45.6                  | 0.0                     |
| OPBE            | 19.6                           | -47.3                   | 22.4                      | -20.8                   | 37.4                        | 1.2                     | 27.1                      | 0.0                     | 39.1                  | 0.0                     |
| XLYP            | 21.5                           | -28.4                   | 19.5                      | -9.7                    | 43.4                        | 15.1                    | 32.4                      | 0.0                     | 46.0                  | 0.0                     |
|                 | <i>Meta-GGAs</i>               |                         |                           |                         |                             |                         |                           |                         |                       |                         |
| M06-L           | 16.9                           | -44.9                   | 19.9                      | -16.5                   | 43.8                        | 6.8                     | 34.2                      | 0.0                     | 46.0                  | 0.0                     |
| MVS             | 12.3                           | -54.3                   | 18.1                      | -24.6                   | 43.1                        | 6.5                     | 28.3                      | 0.0                     | 36.7                  | 0.0                     |
| TPSS            | 15.7                           | -39.5                   | 16.1                      | -19.0                   | 40.5                        | 8.4                     | 30.9                      | 0.0                     | 42.9                  | 0.0                     |
| revTPSS         | 14.7                           | -41.7                   | 15.2                      | -22.2                   | 40.0                        | 6.9                     | 31.5                      | 0.0                     | 44.8                  | 0.0                     |
|                 | <i>Hybrids</i>                 |                         |                           |                         |                             |                         |                           |                         |                       |                         |
| B3LYP           | 22.7                           | -37.1                   | 21.8                      | -18.5                   | 45.1                        | 12.2                    | 35.0                      | 0.0                     | 49.5                  | 0.0                     |
| B3LYP*          | 20.8                           | -37.8                   | 19.9                      | -18.8                   | 44.0                        | 11.9                    | 33.4                      | 0.0                     | 46.6                  | 0.0                     |
| B1LYP           | 24.1                           | -36.9                   | 23.0                      | -18.9                   | 46.0                        | 12.5                    | 36.4                      | 0.0                     | 51.8                  | 0.0                     |
| B1PW91          | 19.7                           | -48.1                   | 21.2                      | -26.3                   | 42.8                        | 6.3                     | 33.0                      | 0.0                     | 46.0                  | 0.0                     |
| BHandH          | 13.0                           | -66.4                   | 14.7                      | -47.8                   | 44.5                        | 4.0                     | 34.2                      | 0.0                     | 42.3                  | 0.0                     |
| BHandHLYP       | 26.9                           | -44.4                   | 26.4                      | -27.7                   | 48.9                        | 10.7                    | 41.1                      | 0.0                     | 58.3                  | 0.0                     |
| KMLYP           | 19.3                           | -60.3                   | 20.8                      | -41.9                   | 46.8                        | 5.5                     | 37.9                      | 0.0                     | 50.0                  | 0.0                     |
| O3LYP           | -1.6                           | -75.2                   | 1.4                       | -52.2                   | 37.7                        | 0.7                     | 23.0                      | 0.0                     | 21.7                  | 0.0                     |
| OPBE0           | 21.5                           | -53.6                   | 24.6                      | -28.7                   | 40.7                        | 0.7                     | 31.7                      | 0.0                     | 45.3                  | 0.0                     |
| PBE0            | 16.6                           | -52.2                   | 18.4                      | -30.3                   | 42.2                        | 5.5                     | 32.2                      | 0.0                     | 43.0                  | 0.0                     |
| mPW1PW          | 18.8                           | -48.5                   | 20.2                      | -27.1                   | 43.0                        | 6.8                     | 33.3                      | 0.0                     | 45.5                  | 0.0                     |
| mPW1K           | 20.9                           | -53.8                   | 22.8                      | -33.1                   | 45.0                        | 5.3                     | 36.5                      | 0.0                     | 50.1                  | 0.0                     |
| S12H            | 16.5                           | -52.4                   | 19.4                      | -28.3                   | 43.2                        | 5.4                     | 34.2                      | 0.0                     | 44.2                  | 0.0                     |
| X3LYP           | 22.0                           | -38.7                   | 21.1                      | -20.3                   | 45.2                        | 12.0                    | 35.1                      | 0.0                     | 49.1                  | 0.0                     |
|                 | <i>Meta-Hybrids</i>            |                         |                           |                         |                             |                         |                           |                         |                       |                         |
| M06             | 19.5                           | -47.4                   | 22.4                      | -22.3                   | 43.7                        | 7.4                     | 35.0                      | 0.0                     | 48.3                  | 0.0                     |
| M06-2X          | 17.8                           | -48.9                   | 20.9                      | -29.9                   | 44.7                        | 8.2                     | 36.3                      | 0.0                     | 48.7                  | 0.0                     |
| M06-HF          | 14.8                           | -48.7                   | 19.0                      | -41.1                   | 43.1                        | 9.4                     | 37.6                      | 0.0                     | 50.8                  | 0.0                     |
| TPSSH           | 17.1                           | -42.6                   | 17.8                      | -22.2                   | 41.6                        | 7.6                     | 32.5                      | 0.0                     | 45.2                  | 0.0                     |
|                 | <i>Double-Hybrids</i>          |                         |                           |                         |                             |                         |                           |                         |                       |                         |
| B2K-PLYP        | 18.4                           | -48.7                   | 18.5                      | -25.0                   | 44.9                        | 9.1                     | 35.7                      | 0.0                     | 48.9                  | 0.0                     |
| B2T-PLYP        | 19.3                           | -45.4                   | 19.1                      | -22.6                   | 44.8                        | 10.0                    | 35.4                      | 0.0                     | 49.0                  | 0.0                     |
| B2-PLYP         | 19.3                           | -43.4                   | 18.8                      | -20.6                   | 44.4                        | 10.6                    | 34.8                      | 0.0                     | 48.2                  | 0.0                     |
| LS1-TPSS        | 14.3                           | -55.9                   | 16.1                      | -29.1                   | 43.1                        | 5.7                     | 33.8                      | 0.0                     | 45.3                  | 0.0                     |
| mPW2K-PLYP      | 18.0                           | -48.8                   | 18.1                      | -25.3                   | 45.0                        | 9.3                     | 35.8                      | 0.0                     | 48.8                  | 0.0                     |
| mPW2-PLYP       | 19.6                           | -44.5                   | 19.2                      | -22.6                   | 45.2                        | 10.7                    | 35.8                      | 0.0                     | 49.4                  | 0.0                     |
| PBE0-DH         | 17.1                           | -56.3                   | 19.2                      | -33.2                   | 43.4                        | 4.6                     | 34.2                      | 0.0                     | 45.8                  | 0.0                     |
| revDSD-BLYP     | 17.2                           | -49.3                   | 17.6                      | -25.5                   | 45.1                        | 9.5                     | 36.7                      | 0.0                     | 49.1                  | 0.0                     |
| revDSD-PBE      | 16.5                           | -52.2                   | 17.5                      | -27.1                   | 43.9                        | 7.2                     | 35.8                      | 0.0                     | 47.1                  | 0.0                     |
| revDSD-PBEP86   | 18.7                           | -49.5                   | 19.2                      | -25.0                   | 44.7                        | 8.1                     | 36.9                      | 0.0                     | 49.3                  | 0.0                     |
|                 | <i>Range-Separated Hybrids</i> |                         |                           |                         |                             |                         |                           |                         |                       |                         |
| CAM-B3LYP       | 23.7                           | -45.1                   | 22.0                      | -27.6                   | 46.3                        | 9.7                     | 37.3                      | 0.0                     | 51.5                  | 0.0                     |
| CAMY-B3LYP      | 21.7                           | -44.1                   | 20.6                      | -26.2                   | 45.6                        | 10.3                    | 36.1                      | 0.0                     | 49.6                  | 0.0                     |
| $\omega$ B97    | 23.3                           | -55.4                   | 22.5                      | -34.7                   | 46.8                        | 4.0                     | 40.3                      | 0.0                     | 53.3                  | 0.0                     |
| $\omega$ B97X   | 22.8                           | -51.8                   | 22.1                      | -32.0                   | 46.3                        | 6.1                     | 38.8                      | 0.0                     | 51.8                  | 0.0                     |
| $\omega$ B97X-D | 23.2                           | -47.4                   | 22.9                      | -27.6                   | 45.0                        | 6.8                     | 36.4                      | 0.0                     | 50.2                  | 0.0                     |



**Table S22** (continued).

| XC           | Diels-Alder Reaction        |                         | 1,3-dipolar Cycloaddition |                         | Electrocyclic Rearrangement |                         | Sigmatropic Rearrangement |                         | Double Group Transfer |                         |
|--------------|-----------------------------|-------------------------|---------------------------|-------------------------|-----------------------------|-------------------------|---------------------------|-------------------------|-----------------------|-------------------------|
|              | $\Delta E^\ddagger$         | $\Delta E_{\text{rxn}}$ | $\Delta E^\ddagger$       | $\Delta E_{\text{rxn}}$ | $\Delta E^\ddagger$         | $\Delta E_{\text{rxn}}$ | $\Delta E^\ddagger$       | $\Delta E_{\text{rxn}}$ | $\Delta E^\ddagger$   | $\Delta E_{\text{rxn}}$ |
|              | <i>Dispersion-Corrected</i> |                         |                           |                         |                             |                         |                           |                         |                       |                         |
| BP86-D3(BJ)  | 9.0                         | -46.5                   | 11.3                      | -23.9                   | 39.7                        | 9.0                     | 27.7                      | 0.0                     | 34.7                  | 0.0                     |
| BLYP-D3(BJ)  | 13.3                        | -36.0                   | 13.9                      | -15.8                   | 42.5                        | 14.3                    | 31.0                      | 0.0                     | 40.9                  | 0.0                     |
| PBE-D3(BJ)   | 9.1                         | -48.8                   | 11.4                      | -25.4                   | 39.1                        | 7.4                     | 27.2                      | 0.0                     | 33.6                  | 0.0                     |
| OLYP-D3(BJ)  | 7.8                         | -49.4                   | 12.4                      | -24.8                   | 39.5                        | 7.7                     | 27.6                      | 0.0                     | 36.3                  | 0.0                     |
| OPBE-D3(BJ)  | 3.4                         | -61.2                   | 10.9                      | -32.5                   | 36.2                        | 1.0                     | 24.3                      | 0.0                     | 30.0                  | 0.0                     |
| B3LYP-D3(BJ) | 16.3                        | -42.3                   | 17.3                      | -22.8                   | 44.7                        | 12.3                    | 34.4                      | 0.0                     | 45.9                  | 0.0                     |
| PBE0-D3(BJ)  | 9.5                         | -48.4                   | 11.7                      | -25.1                   | 39.2                        | 7.4                     | 27.3                      | 0.0                     | 33.9                  | 0.0                     |
| M06-2X-D3    | 17.7                        | -49.0                   | 20.8                      | -29.9                   | 44.7                        | 8.2                     | 36.4                      | 0.0                     | 48.8                  | 0.0                     |

**Table S23.** Errors in reaction barriers and reaction energies (kcal mol<sup>-1</sup>) for the various pericyclic reactions, computed with XC/TZ2P//BP86/DZP, compared to CCSDT(Q)/CBS//CCSD(T)/cc-pVTZ.

| XC              | Diels-Alder Reaction           |                         | 1,3-dipolar Cycloaddition |                         | Electrocyclic Rearrangement |                         | Sigmatropic Rearrangement |                         | Double Group Transfer |                         |  |
|-----------------|--------------------------------|-------------------------|---------------------------|-------------------------|-----------------------------|-------------------------|---------------------------|-------------------------|-----------------------|-------------------------|--|
|                 | $\Delta E^\ddagger$            | $\Delta E_{\text{rxn}}$ | $\Delta E^\ddagger$       | $\Delta E_{\text{rxn}}$ | $\Delta E^\ddagger$         | $\Delta E_{\text{rxn}}$ | $\Delta E^\ddagger$       | $\Delta E_{\text{rxn}}$ | $\Delta E^\ddagger$   | $\Delta E_{\text{rxn}}$ |  |
|                 | <i>LDA</i>                     |                         |                           |                         |                             |                         |                           |                         |                       |                         |  |
| VWN             | -18.7                          | -17.0                   | -15.0                     | -12.4                   | -6.8                        | -5.6                    | -14.9                     | 0.0                     | -28.2                 | 0.0                     |  |
|                 | <i>GGAs</i>                    |                         |                           |                         |                             |                         |                           |                         |                       |                         |  |
| BP86            | -4.4                           | 6.1                     | -2.8                      | 8.8                     | -3.5                        | 0.4                     | -8.6                      | 0.0                     | -12.1                 | 0.0                     |  |
| BLYP            | 1.6                            | 18.1                    | 1.1                       | 18.3                    | -0.5                        | 5.9                     | -5.0                      | 0.0                     | -4.9                  | 0.0                     |  |
| BEE             | -3.3                           | 5.4                     | -0.9                      | 9.9                     | -4.1                        | -1.5                    | -8.7                      | 0.0                     | -11.7                 | 0.0                     |  |
| PW91            | -7.1                           | 2.1                     | -4.8                      | 5.7                     | -3.8                        | -0.4                    | -9.0                      | 0.0                     | -14.4                 | 0.0                     |  |
| PBE             | -6.6                           | 2.1                     | -4.2                      | 6.0                     | -4.1                        | -1.2                    | -9.2                      | 0.0                     | -14.3                 | 0.0                     |  |
| PBEsol          | -12.8                          | -8.6                    | -9.3                      | -3.8                    | -6.3                        | -4.7                    | -12.8                     | 0.0                     | -21.8                 | 0.0                     |  |
| RPBE            | -0.6                           | 10.4                    | 1.1                       | 14.0                    | -3.1                        | 0.5                     | -6.9                      | 0.0                     | -8.4                  | 0.0                     |  |
| revPBE          | -1.0                           | 9.6                     | 1.0                       | 13.4                    | -3.3                        | 0.1                     | -7.4                      | 0.0                     | -8.9                  | 0.0                     |  |
| mPBE            | -5.0                           | 4.4                     | -2.8                      | 8.2                     | -3.8                        | -0.6                    | -8.5                      | 0.0                     | -12.7                 | 0.0                     |  |
| mPW             | -3.9                           | 6.5                     | -2.0                      | 10.0                    | -3.2                        | 0.5                     | -8.0                      | 0.0                     | -11.2                 | 0.0                     |  |
| HTBS            | -5.5                           | 1.3                     | -2.5                      | 5.9                     | -5.5                        | -3.2                    | -10.7                     | 0.0                     | -14.7                 | 0.0                     |  |
| OLYP            | 4.6                            | 12.6                    | 6.0                       | 16.4                    | -2.5                        | -0.4                    | -5.9                      | 0.0                     | -4.6                  | 0.0                     |  |
| OPBE            | 0.0                            | 0.4                     | 4.1                       | 8.1                     | -6.0                        | -7.3                    | -9.7                      | 0.0                     | -11.1                 | 0.0                     |  |
| XLYP            | 1.9                            | 19.3                    | 1.2                       | 19.2                    | 0.0                         | 6.7                     | -4.4                      | 0.0                     | -4.2                  | 0.0                     |  |
|                 | <i>Meta-GGAs</i>               |                         |                           |                         |                             |                         |                           |                         |                       |                         |  |
| M06-L           | -2.7                           | 2.8                     | 1.6                       | 12.4                    | 0.4                         | -1.7                    | -2.6                      | 0.0                     | -4.2                  | 0.0                     |  |
| MVS             | -7.3                           | -6.7                    | -0.2                      | 4.3                     | -0.3                        | -2.0                    | -8.5                      | 0.0                     | -13.5                 | 0.0                     |  |
| TPSS            | -3.9                           | 8.2                     | -2.2                      | 9.9                     | -2.9                        | 0.0                     | -5.9                      | 0.0                     | -7.3                  | 0.0                     |  |
| revTPSS         | -4.9                           | 6.0                     | -3.1                      | 6.7                     | -3.4                        | -1.6                    | -5.3                      | 0.0                     | -5.4                  | 0.0                     |  |
|                 | <i>Hybrids</i>                 |                         |                           |                         |                             |                         |                           |                         |                       |                         |  |
| B3LYP           | 3.1                            | 10.6                    | 3.5                       | 10.4                    | 1.7                         | 3.8                     | -1.8                      | 0.0                     | -0.7                  | 0.0                     |  |
| B3LYP*          | 1.2                            | 9.9                     | 1.6                       | 10.1                    | 0.6                         | 3.5                     | -3.4                      | 0.0                     | -3.6                  | 0.0                     |  |
| B1LYP           | 4.5                            | 10.8                    | 4.7                       | 10.0                    | 2.6                         | 4.1                     | -0.4                      | 0.0                     | 1.6                   | 0.0                     |  |
| B1PW91          | 0.1                            | -0.5                    | 2.9                       | 2.6                     | -0.6                        | -2.2                    | -3.8                      | 0.0                     | -4.2                  | 0.0                     |  |
| BHandH          | -6.6                           | -18.8                   | -3.6                      | -18.9                   | 1.1                         | -4.5                    | -2.6                      | 0.0                     | -7.9                  | 0.0                     |  |
| BHandHLYP       | 7.3                            | 3.3                     | 8.1                       | 1.2                     | 5.5                         | 2.3                     | 4.3                       | 0.0                     | 8.1                   | 0.0                     |  |
| KMLYP           | -0.3                           | -12.7                   | 2.5                       | -13.0                   | 3.4                         | -3.0                    | 1.1                       | 0.0                     | -0.2                  | 0.0                     |  |
| O3LYP           | -21.2                          | -27.6                   | -16.9                     | -23.3                   | -5.7                        | -7.8                    | -13.8                     | 0.0                     | -28.5                 | 0.0                     |  |
| OPBE0           | 1.9                            | -6.0                    | 6.3                       | 0.2                     | -2.7                        | -7.8                    | -5.1                      | 0.0                     | -4.9                  | 0.0                     |  |
| PBE0            | -3.0                           | -4.6                    | 0.1                       | -1.4                    | -1.2                        | -3.0                    | -4.6                      | 0.0                     | -7.2                  | 0.0                     |  |
| mPW1PW          | -0.8                           | -0.9                    | 1.9                       | 1.8                     | -0.4                        | -1.7                    | -3.5                      | 0.0                     | -4.7                  | 0.0                     |  |
| mPW1K           | 1.3                            | -6.2                    | 4.5                       | -4.2                    | 1.6                         | -3.2                    | -0.3                      | 0.0                     | -0.1                  | 0.0                     |  |
| S12H            | -3.1                           | -4.8                    | 1.1                       | 0.6                     | -0.2                        | -3.1                    | -2.6                      | 0.0                     | -6.0                  | 0.0                     |  |
| X3LYP           | 2.4                            | 9.0                     | 2.8                       | 8.6                     | 1.8                         | 3.6                     | -1.7                      | 0.0                     | -1.1                  | 0.0                     |  |
|                 | <i>Meta-Hybrids</i>            |                         |                           |                         |                             |                         |                           |                         |                       |                         |  |
| M06             | -0.1                           | 0.3                     | 4.1                       | 6.6                     | 0.3                         | -1.1                    | -1.8                      | 0.0                     | -1.9                  | 0.0                     |  |
| M06-2X          | -1.8                           | -1.3                    | 2.6                       | -1.0                    | 1.3                         | -0.3                    | -0.5                      | 0.0                     | -1.5                  | 0.0                     |  |
| M06-HF          | -4.8                           | -1.1                    | 0.7                       | -12.2                   | -0.3                        | 1.0                     | 0.8                       | 0.0                     | 0.6                   | 0.0                     |  |
| TPSSH           | -2.5                           | 5.1                     | -0.5                      | 6.7                     | -1.8                        | -0.9                    | -4.3                      | 0.0                     | -5.0                  | 0.0                     |  |
|                 | <i>Double-Hybrids</i>          |                         |                           |                         |                             |                         |                           |                         |                       |                         |  |
| B2K-PLYP        | -1.2                           | -1.1                    | 0.2                       | 3.9                     | 1.5                         | 0.7                     | -1.1                      | 0.0                     | -1.3                  | 0.0                     |  |
| B2T-PLYP        | -0.3                           | 2.3                     | 0.8                       | 6.3                     | 1.4                         | 1.6                     | -1.4                      | 0.0                     | -1.2                  | 0.0                     |  |
| B2-PLYP         | -0.3                           | 4.3                     | 0.5                       | 8.3                     | 1.0                         | 2.2                     | -2.0                      | 0.0                     | -2.0                  | 0.0                     |  |
| LS1-TPSS        | -5.3                           | -8.3                    | -2.2                      | -0.2                    | -0.3                        | -2.8                    | -3.0                      | 0.0                     | -4.9                  | 0.0                     |  |
| mPW2K-PLYP      | -1.6                           | -1.2                    | -0.2                      | 3.6                     | 1.6                         | 0.9                     | -1.0                      | 0.0                     | -1.4                  | 0.0                     |  |
| mPW2-PLYP       | 0.0                            | 3.2                     | 0.9                       | 6.3                     | 1.8                         | 2.3                     | -1.0                      | 0.0                     | -0.8                  | 0.0                     |  |
| PBE0-DH         | -2.5                           | -8.7                    | 0.9                       | -4.3                    | 0.0                         | -3.9                    | -2.6                      | 0.0                     | -4.4                  | 0.0                     |  |
| revDSD-BLYP     | -2.4                           | -1.7                    | -0.7                      | 3.4                     | 1.7                         | 1.1                     | -0.1                      | 0.0                     | -1.1                  | 0.0                     |  |
| revDSD-PBE      | -3.1                           | -4.6                    | -0.8                      | 1.8                     | 0.5                         | -1.3                    | -1.0                      | 0.0                     | -3.1                  | 0.0                     |  |
| revDSD-PBEP86   | -0.9                           | -1.9                    | 0.9                       | 3.9                     | 1.3                         | -0.4                    | 0.1                       | 0.0                     | -0.9                  | 0.0                     |  |
|                 | <i>Range-Separated Hybrids</i> |                         |                           |                         |                             |                         |                           |                         |                       |                         |  |
| CAM-B3LYP       | 4.1                            | 2.6                     | 3.7                       | 1.3                     | 2.9                         | 1.3                     | 0.5                       | 0.0                     | 1.3                   | 0.0                     |  |
| CAMY-B3LYP      | 2.1                            | 3.6                     | 2.3                       | 2.7                     | 2.2                         | 1.9                     | -0.7                      | 0.0                     | -0.6                  | 0.0                     |  |
| $\omega$ B97    | 3.7                            | -7.8                    | 4.2                       | -5.8                    | 3.4                         | -4.5                    | 3.5                       | 0.0                     | 3.1                   | 0.0                     |  |
| $\omega$ B97X   | 3.2                            | -4.2                    | 3.8                       | -3.1                    | 2.9                         | -2.4                    | 2.0                       | 0.0                     | 1.6                   | 0.0                     |  |
| $\omega$ B97X-D | 3.6                            | 0.3                     | 4.6                       | 1.3                     | 1.6                         | -1.7                    | -0.4                      | 0.0                     | 0.0                   | 0.0                     |  |

**Table S23** (continued).

| XC           | Diels-Alder<br>Reaction     |                         | 1,3-dipolar<br>Cycloaddition |                         | Electrocyclic<br>Rearrangement |                         | Sigmatropic<br>Rearrangement |                         | Double Group<br>Transfer |                         |
|--------------|-----------------------------|-------------------------|------------------------------|-------------------------|--------------------------------|-------------------------|------------------------------|-------------------------|--------------------------|-------------------------|
|              | $\Delta E^\ddagger$         | $\Delta E_{\text{rxn}}$ | $\Delta E^\ddagger$          | $\Delta E_{\text{rxn}}$ | $\Delta E^\ddagger$            | $\Delta E_{\text{rxn}}$ | $\Delta E^\ddagger$          | $\Delta E_{\text{rxn}}$ | $\Delta E^\ddagger$      | $\Delta E_{\text{rxn}}$ |
|              | <i>Dispersion-Corrected</i> |                         |                              |                         |                                |                         |                              |                         |                          |                         |
| BP86-D3(BJ)  | -10.6                       | 1.2                     | -7.0                         | 5.0                     | -3.7                           | 0.6                     | -9.1                         | 0.0                     | -15.5                    | 0.0                     |
| BLYP-D3(BJ)  | -6.3                        | 11.7                    | -4.4                         | 13.1                    | -0.9                           | 5.9                     | -5.8                         | 0.0                     | -9.3                     | 0.0                     |
| PBE-D3(BJ)   | -10.5                       | -1.2                    | -6.9                         | 3.5                     | -4.3                           | -1.1                    | -9.6                         | 0.0                     | -16.6                    | 0.0                     |
| OLYP-D3(BJ)  | -11.8                       | -1.8                    | -5.9                         | 4.1                     | -3.9                           | -0.7                    | -9.2                         | 0.0                     | -13.9                    | 0.0                     |
| OPBE-D3(BJ)  | -16.2                       | -13.6                   | -7.4                         | -3.6                    | -7.2                           | -7.5                    | -12.5                        | 0.0                     | -20.2                    | 0.0                     |
| B3LYP-D3(BJ) | -3.3                        | 5.4                     | -1.0                         | 6.1                     | 1.3                            | 3.9                     | -2.4                         | 0.0                     | -4.3                     | 0.0                     |
| PBE0-D3(BJ)  | -10.1                       | -0.8                    | -6.6                         | 3.8                     | -4.2                           | -1.1                    | -9.5                         | 0.0                     | -16.3                    | 0.0                     |
| M06-2X-D3    | -1.9                        | -1.4                    | 2.5                          | -1.0                    | 1.3                            | -0.3                    | -0.4                         | 0.0                     | -1.4                     | 0.0                     |

**Table S24.** Mean error (ME), mean absolute error (MAE), maximum unsigned error (MUE) and standard deviation (SD) of reaction barriers and energies (kcal mol<sup>-1</sup>) for the various pericyclic reactions, computed with XC/TZ2P//BP86/DZP compared to CCSDT(Q)/CBS//CCSD(T)/cc-pVTZ.

| XC              | $\Delta E^\ddagger$            |      |      |     | $\Delta E_{\text{rxn}}$ |      |      |     | Total |      |      |     |
|-----------------|--------------------------------|------|------|-----|-------------------------|------|------|-----|-------|------|------|-----|
|                 | ME                             | MAE  | MUE  | SD  | ME                      | MAE  | MUE  | SD  | ME    | MAE  | MUE  | SD  |
|                 | <i>LDA</i>                     |      |      |     |                         |      |      |     |       |      |      |     |
| VWN             | -16.7                          | 16.7 | 28.2 | 6.9 | -11.6                   | 11.6 | 17.0 | 4.7 | -14.8 | 14.8 | 28.2 | 6.7 |
|                 | <i>GGAs</i>                    |      |      |     |                         |      |      |     |       |      |      |     |
| BP86            | -6.3                           | 6.3  | 12.1 | 3.5 | 5.1                     | 5.1  | 8.8  | 3.5 | -2.0  | 5.8  | 12.1 | 3.6 |
| BLYP            | -1.5                           | 2.6  | 5.0  | 1.9 | 14.1                    | 14.1 | 18.3 | 5.8 | 4.3   | 6.9  | 18.3 | 6.7 |
| BEE             | -5.7                           | 5.7  | 11.7 | 3.9 | 4.6                     | 5.6  | 9.9  | 3.4 | -1.9  | 5.7  | 11.7 | 3.7 |
| PW91            | -7.8                           | 7.8  | 14.4 | 3.8 | 2.4                     | 2.7  | 5.7  | 2.2 | -4.0  | 5.9  | 14.4 | 4.1 |
| PBE             | -7.7                           | 7.7  | 14.3 | 3.8 | 2.3                     | 3.1  | 6.0  | 2.1 | -3.9  | 5.9  | 14.3 | 4.0 |
| PBEsol          | -12.6                          | 12.6 | 21.8 | 5.2 | -5.7                    | 5.7  | 8.6  | 2.1 | -10.0 | 10.0 | 21.8 | 5.5 |
| RPBE            | -3.6                           | 4.0  | 8.4  | 3.1 | 8.3                     | 8.3  | 14.0 | 5.7 | 0.9   | 5.6  | 14.0 | 4.7 |
| revPBE          | -3.9                           | 4.3  | 8.9  | 3.3 | 7.7                     | 7.7  | 13.4 | 5.6 | 0.4   | 5.6  | 13.4 | 4.6 |
| mPBE            | -6.6                           | 6.6  | 12.7 | 3.6 | 4.0                     | 4.4  | 8.2  | 3.1 | -2.6  | 5.7  | 12.7 | 3.6 |
| mPW             | -5.7                           | 5.7  | 11.2 | 3.4 | 5.6                     | 5.6  | 10.0 | 3.9 | -1.4  | 5.6  | 11.2 | 3.6 |
| HTBS            | -7.8                           | 7.8  | 14.7 | 4.4 | 1.3                     | 3.4  | 5.9  | 1.9 | -4.4  | 6.1  | 14.7 | 4.2 |
| OLYP            | -0.5                           | 4.7  | 6.0  | 1.2 | 9.5                     | 9.8  | 16.4 | 6.8 | 3.3   | 6.6  | 16.4 | 4.9 |
| OPBE            | -4.5                           | 6.2  | 11.1 | 4.0 | 0.4                     | 5.2  | 8.1  | 3.5 | -2.7  | 5.8  | 11.1 | 3.8 |
| XLYP            | -1.1                           | 2.4  | 4.4  | 1.7 | 15.0                    | 15.0 | 19.3 | 5.9 | 4.9   | 7.1  | 19.3 | 7.2 |
|                 | <i>Meta-GGAs</i>               |      |      |     |                         |      |      |     |       |      |      |     |
| M06-L           | -1.5                           | 2.3  | 4.2  | 1.3 | 4.5                     | 5.6  | 12.4 | 4.8 | 0.7   | 3.5  | 12.4 | 3.5 |
| MVS             | -6.0                           | 6.0  | 13.5 | 5.1 | -1.4                    | 4.3  | 6.7  | 1.9 | -4.3  | 5.3  | 13.5 | 4.3 |
| TPSS            | -4.4                           | 4.4  | 7.3  | 1.9 | 6.0                     | 6.0  | 9.9  | 4.3 | -0.5  | 5.0  | 9.9  | 3.1 |
| revTPSS         | -4.4                           | 4.4  | 5.4  | 1.0 | 3.7                     | 4.7  | 6.7  | 2.3 | -1.4  | 4.5  | 6.7  | 1.6 |
|                 | <i>Hybrids</i>                 |      |      |     |                         |      |      |     |       |      |      |     |
| B3LYP           | 1.2                            | 2.2  | 3.5  | 1.0 | 8.2                     | 8.2  | 10.6 | 3.2 | 3.8   | 4.4  | 10.6 | 3.6 |
| B3LYP*          | -0.7                           | 2.1  | 3.6  | 1.2 | 7.8                     | 7.8  | 10.1 | 3.1 | 2.5   | 4.2  | 10.1 | 3.5 |
| B1LYP           | 2.6                            | 2.8  | 4.7  | 1.7 | 8.3                     | 8.3  | 10.8 | 3.0 | 4.7   | 4.8  | 10.8 | 3.5 |
| B1PW91          | -1.1                           | 2.3  | 4.2  | 1.7 | 0.0                     | 1.7  | 2.6  | 0.9 | -0.7  | 2.1  | 4.2  | 1.5 |
| BHandH          | -3.9                           | 4.3  | 7.9  | 2.5 | -14.0                   | 14.0 | 18.9 | 6.8 | -7.7  | 8.0  | 18.9 | 6.6 |
| BHandHLYP       | 6.7                            | 6.7  | 8.1  | 1.5 | 2.2                     | 2.2  | 3.3  | 0.9 | 5.0   | 5.0  | 8.1  | 2.5 |
| KMLYP           | 1.3                            | 1.5  | 3.4  | 1.2 | -9.5                    | 9.5  | 13.0 | 4.7 | -2.8  | 4.5  | 13.0 | 4.9 |
| O3LYP           | -17.2                          | 17.2 | 28.5 | 7.6 | -19.5                   | 19.5 | 27.6 | 8.5 | -18.1 | 18.1 | 28.5 | 8.0 |
| OPBE0           | -0.9                           | 4.2  | 6.3  | 1.6 | -4.5                    | 4.6  | 7.8  | 3.2 | -2.3  | 4.4  | 7.8  | 2.4 |
| PBE0            | -3.2                           | 3.2  | 7.2  | 2.5 | -3.0                    | 3.0  | 4.6  | 1.3 | -3.1  | 3.1  | 7.2  | 2.1 |
| mPW1PW          | -1.5                           | 2.3  | 4.7  | 1.6 | -0.2                    | 1.4  | 1.8  | 0.4 | -1.0  | 1.9  | 4.7  | 1.4 |
| mPW1K           | 1.4                            | 1.6  | 4.5  | 1.6 | -4.5                    | 4.5  | 6.2  | 1.2 | -0.8  | 2.7  | 6.2  | 2.0 |
| S12H            | -2.2                           | 2.6  | 6.0  | 2.0 | -2.4                    | 2.8  | 4.8  | 1.7 | -2.3  | 2.7  | 6.0  | 1.9 |
| X3LYP           | 0.8                            | 2.0  | 2.8  | 0.6 | 7.0                     | 7.0  | 9.0  | 2.5 | 3.2   | 3.9  | 9.0  | 2.9 |
|                 | <i>Meta-Hybrids</i>            |      |      |     |                         |      |      |     |       |      |      |     |
| M06             | 0.1                            | 1.6  | 4.1  | 1.5 | 1.9                     | 2.6  | 6.6  | 2.8 | 0.8   | 2.0  | 6.6  | 2.1 |
| M06-2X          | 0.0                            | 1.5  | 2.6  | 0.7 | -0.8                    | 0.8  | 1.3  | 0.4 | -0.3  | 1.3  | 2.6  | 0.7 |
| M06-HF          | -0.6                           | 1.4  | 4.8  | 1.7 | -4.1                    | 4.7  | 12.2 | 5.3 | -1.9  | 2.7  | 12.2 | 3.9 |
| TPSSH           | -2.8                           | 2.8  | 5.0  | 1.6 | 3.6                     | 4.2  | 6.7  | 2.4 | -0.4  | 3.3  | 6.7  | 2.1 |
|                 | <i>Double-Hybrids</i>          |      |      |     |                         |      |      |     |       |      |      |     |
| B2K-PLYP        | -0.4                           | 1.1  | 1.5  | 0.4 | 1.2                     | 1.9  | 3.9  | 1.4 | 0.2   | 1.4  | 3.9  | 1.0 |
| B2T-PLYP        | -0.1                           | 1.0  | 1.4  | 0.4 | 3.4                     | 3.4  | 6.3  | 2.1 | 1.2   | 1.9  | 6.3  | 1.7 |
| B2-PLYP         | -0.6                           | 1.2  | 2.0  | 0.7 | 4.9                     | 4.9  | 8.3  | 2.5 | 1.5   | 2.6  | 8.3  | 2.5 |
| LS1-TPSS        | -3.1                           | 3.1  | 5.3  | 1.8 | -3.7                    | 3.7  | 8.3  | 3.3 | -3.4  | 3.4  | 8.3  | 2.5 |
| mPW2K-PLYP      | -0.5                           | 1.1  | 1.6  | 0.5 | 1.1                     | 1.9  | 3.6  | 1.2 | 0.1   | 1.4  | 3.6  | 0.9 |
| mPW2-PLYP       | 0.2                            | 0.9  | 1.8  | 0.5 | 3.9                     | 3.9  | 6.3  | 1.7 | 1.6   | 2.0  | 6.3  | 1.8 |
| PBE0-DH         | -1.7                           | 2.1  | 4.4  | 1.5 | -5.6                    | 5.6  | 8.7  | 2.2 | -3.2  | 3.4  | 8.7  | 2.5 |
| revDSD-BLYP     | -0.5                           | 1.2  | 2.4  | 0.8 | 0.9                     | 2.0  | 3.4  | 1.0 | 0.0   | 1.5  | 3.4  | 1.0 |
| revDSD-PBE      | -1.5                           | 1.7  | 3.1  | 1.2 | -1.3                    | 2.5  | 4.6  | 1.5 | -1.4  | 2.0  | 4.6  | 1.3 |
| revDSD-PBEP86   | 0.1                            | 0.8  | 1.3  | 0.4 | 0.6                     | 2.0  | 3.9  | 1.4 | 0.3   | 1.3  | 3.9  | 1.1 |
|                 | <i>Range-Separated Hybrids</i> |      |      |     |                         |      |      |     |       |      |      |     |
| CAM-B3LYP       | 2.5                            | 2.5  | 4.1  | 1.4 | 1.7                     | 1.7  | 2.6  | 0.6 | 2.2   | 2.2  | 4.1  | 1.2 |
| CAMY-B3LYP      | 1.1                            | 1.6  | 2.3  | 0.8 | 2.7                     | 2.7  | 3.6  | 0.7 | 1.7   | 2.0  | 3.6  | 0.9 |
| $\omega$ B97    | 3.6                            | 3.6  | 4.2  | 0.4 | -6.0                    | 6.0  | 7.8  | 1.4 | 0.0   | 4.5  | 7.8  | 1.5 |
| $\omega$ B97X   | 2.7                            | 2.7  | 3.8  | 0.8 | -3.2                    | 3.2  | 4.2  | 0.7 | 0.5   | 2.9  | 4.2  | 0.8 |
| $\omega$ B97X-D | 1.9                            | 2.0  | 4.6  | 1.8 | 0.0                     | 1.1  | 1.7  | 0.6 | 1.2   | 1.7  | 4.6  | 1.5 |

**Table S24** (continued).

| XC           | $\Delta E^\ddagger$         |      |      |     | $\Delta E_{\text{rxn}}$ |      |      |     | Total |      |      |     |
|--------------|-----------------------------|------|------|-----|-------------------------|------|------|-----|-------|------|------|-----|
|              | ME                          | MAE  | MUE  | SD  | ME                      | MAE  | MUE  | SD  | ME    | MAE  | MUE  | SD  |
|              | <i>Dispersion-Corrected</i> |      |      |     |                         |      |      |     |       |      |      |     |
| BP86-D3(BJ)  | -9.2                        | 9.2  | 15.5 | 3.9 | 2.2                     | 2.2  | 5.0  | 2.0 | -4.9  | 6.6  | 15.5 | 4.7 |
| BLYP-D3(BJ)  | -5.3                        | 5.3  | 9.3  | 2.7 | 10.2                    | 10.2 | 13.1 | 3.1 | 0.5   | 7.2  | 13.1 | 3.7 |
| PBE-D3(BJ)   | -9.6                        | 9.6  | 16.6 | 4.1 | 0.4                     | 1.9  | 3.5  | 1.1 | -5.8  | 6.7  | 16.6 | 5.0 |
| OLYP-D3(BJ)  | -8.9                        | 8.9  | 13.9 | 3.7 | 0.5                     | 2.2  | 4.1  | 1.4 | -5.4  | 6.4  | 13.9 | 4.5 |
| OPBE-D3(BJ)  | -12.7                       | 12.7 | 20.2 | 5.0 | -8.2                    | 8.2  | 13.6 | 4.1 | -11.0 | 11.0 | 20.2 | 5.2 |
| B3LYP-D3(BJ) | -1.9                        | 2.4  | 4.3  | 1.2 | 5.1                     | 5.1  | 6.1  | 0.9 | 0.7   | 3.4  | 6.1  | 1.7 |
| PBE0-D3(BJ)  | -9.3                        | 9.3  | 16.3 | 4.1 | 0.7                     | 1.9  | 3.8  | 1.4 | -5.6  | 6.5  | 16.3 | 4.9 |
| M06-2X-D3    | 0.0                         | 1.5  | 2.5  | 0.7 | -0.9                    | 0.9  | 1.4  | 0.5 | -0.3  | 1.3  | 2.5  | 0.7 |

**Table S25.** Reaction barriers and reaction energies (kcal mol<sup>-1</sup>) for the various pericyclic reactions, computed with XC/QZ4P//BP86/DZP.

| XC              | Diels-Alder Reaction           |                         | 1,3-dipolar Cycloaddition |                         | Electrocyclic Rearrangement |                         | Sigmatropic Rearrangement |                         | Double Group Transfer |                         |  |
|-----------------|--------------------------------|-------------------------|---------------------------|-------------------------|-----------------------------|-------------------------|---------------------------|-------------------------|-----------------------|-------------------------|--|
|                 | $\Delta E^\ddagger$            | $\Delta E_{\text{rxn}}$ | $\Delta E^\ddagger$       | $\Delta E_{\text{rxn}}$ | $\Delta E^\ddagger$         | $\Delta E_{\text{rxn}}$ | $\Delta E^\ddagger$       | $\Delta E_{\text{rxn}}$ | $\Delta E^\ddagger$   | $\Delta E_{\text{rxn}}$ |  |
|                 | <i>LDA</i>                     |                         |                           |                         |                             |                         |                           |                         |                       |                         |  |
| VWN             | 0.7                            | -65.1                   | 3.1                       | -42.1                   | 36.3                        | 2.4                     | 21.9                      | 0.0                     | 22.0                  | 0.0                     |  |
|                 | <i>GGAs</i>                    |                         |                           |                         |                             |                         |                           |                         |                       |                         |  |
| BP86            | 15.1                           | -42.3                   | 15.4                      | -20.7                   | 39.6                        | 8.2                     | 28.2                      | 0.0                     | 38.1                  | 0.0                     |  |
| BLYP            | 21.0                           | -30.2                   | 19.3                      | -11.0                   | 42.7                        | 13.8                    | 31.8                      | 0.0                     | 45.2                  | 0.0                     |  |
| BEE             | 16.0                           | -43.1                   | 17.2                      | -19.9                   | 38.8                        | 6.3                     | 28.0                      | 0.0                     | 38.4                  | 0.0                     |  |
| PW91            | 12.3                           | -46.2                   | 13.3                      | -24.0                   | 39.2                        | 7.3                     | 27.8                      | 0.0                     | 35.8                  | 0.0                     |  |
| PBE             | 12.8                           | -46.3                   | 13.9                      | -23.7                   | 38.9                        | 6.7                     | 27.6                      | 0.0                     | 35.8                  | 0.0                     |  |
| PBEsol          | 6.6                            | -56.9                   | 8.8                       | -33.6                   | 36.7                        | 3.2                     | 24.0                      | 0.0                     | 28.4                  | 0.0                     |  |
| RPBE            | 18.7                           | -38.1                   | 19.2                      | -15.7                   | 39.9                        | 8.2                     | 29.8                      | 0.0                     | 41.7                  | 0.0                     |  |
| revPBE          | 18.4                           | -39.0                   | 19.1                      | -16.3                   | 39.7                        | 7.8                     | 29.3                      | 0.0                     | 41.2                  | 0.0                     |  |
| mPBE            | 14.4                           | -44.1                   | 15.3                      | -21.5                   | 39.2                        | 7.1                     | 28.2                      | 0.0                     | 37.4                  | 0.0                     |  |
| mPW             | 15.5                           | -41.9                   | 16.2                      | -19.7                   | 39.8                        | 8.3                     | 28.8                      | 0.0                     | 39.0                  | 0.0                     |  |
| HTBS            | 13.8                           | -47.1                   | 15.5                      | -24.0                   | 37.4                        | 4.6                     | 26.1                      | 0.0                     | 35.5                  | 0.0                     |  |
| OLYP            | 24.0                           | -36.0                   | 24.0                      | -13.5                   | 40.4                        | 7.1                     | 30.7                      | 0.0                     | 45.4                  | 0.0                     |  |
| OPBE            | 19.3                           | -48.5                   | 22.0                      | -22.3                   | 36.7                        | 0.0                     | 26.9                      | 0.0                     | 38.9                  | 0.0                     |  |
| XLYP            | 21.3                           | -28.9                   | 19.4                      | -10.2                   | 43.1                        | 14.6                    | 32.4                      | 0.0                     | 46.0                  | 0.0                     |  |
|                 | <i>Meta-GGAs</i>               |                         |                           |                         |                             |                         |                           |                         |                       |                         |  |
| M06-L           | 17.0                           | -45.9                   | 20.1                      | -17.1                   | 43.6                        | 5.9                     | 34.0                      | 0.0                     | 45.9                  | 0.0                     |  |
| MVS             | 12.8                           | -54.2                   | 18.6                      | -24.6                   | 42.7                        | 5.9                     | 28.3                      | 0.0                     | 36.7                  | 0.0                     |  |
| TPSS            | 15.6                           | -40.3                   | 16.0                      | -19.8                   | 40.2                        | 7.7                     | 30.9                      | 0.0                     | 42.9                  | 0.0                     |  |
| revTPSS         | 14.6                           | -42.3                   | 15.1                      | -22.9                   | 39.6                        | 6.1                     | 31.5                      | 0.0                     | 44.9                  | 0.0                     |  |
|                 | <i>Hybrids</i>                 |                         |                           |                         |                             |                         |                           |                         |                       |                         |  |
| B3LYP           | 22.7                           | -37.5                   | 21.8                      | -18.9                   | 44.8                        | 11.8                    | 35.1                      | 0.0                     | 49.6                  | 0.0                     |  |
| B3LYP*          | 20.8                           | -38.2                   | 19.9                      | -19.2                   | 43.8                        | 11.5                    | 33.5                      | 0.0                     | 46.7                  | 0.0                     |  |
| B1LYP           | 24.2                           | -37.2                   | 23.0                      | -19.2                   | 45.7                        | 12.1                    | 36.4                      | 0.0                     | 51.9                  | 0.0                     |  |
| B1PW91          | 19.7                           | -48.4                   | 21.3                      | -26.8                   | 42.4                        | 5.7                     | 33.1                      | 0.0                     | 46.1                  | 0.0                     |  |
| BHandH          | 13.2                           | -66.2                   | 14.9                      | -48.0                   | 44.3                        | 3.6                     | 34.3                      | 0.0                     | 42.5                  | 0.0                     |  |
| BHandHLYP       | 27.2                           | -44.3                   | 26.6                      | -27.8                   | 48.7                        | 10.4                    | 41.3                      | 0.0                     | 58.5                  | 0.0                     |  |
| KMLYP           | 19.6                           | -60.1                   | 21.0                      | -42.1                   | 46.6                        | 5.2                     | 38.1                      | 0.0                     | 50.2                  | 0.0                     |  |
| O3LYP           | -1.7                           | -75.5                   | 1.4                       | -52.8                   | 37.4                        | 0.3                     | 23.0                      | 0.0                     | 21.8                  | 0.0                     |  |
| OPBE0           | 21.4                           | -54.2                   | 24.5                      | -29.8                   | 40.0                        | -0.2                    | 31.7                      | 0.0                     | 45.3                  | 0.0                     |  |
| PBE0            | 16.6                           | -52.5                   | 18.4                      | -30.8                   | 41.8                        | 4.9                     | 32.2                      | 0.0                     | 43.0                  | 0.0                     |  |
| mPW1PW          | 18.8                           | -48.8                   | 20.2                      | -27.6                   | 42.7                        | 6.3                     | 33.3                      | 0.0                     | 45.6                  | 0.0                     |  |
| mPW1K           | 21.1                           | -53.9                   | 23.0                      | -33.5                   | 44.6                        | 4.8                     | 36.6                      | 0.0                     | 50.3                  | 0.0                     |  |
| S12H            | 16.5                           | -53.1                   | 19.4                      | -29.1                   | 42.8                        | 4.5                     | 34.2                      | 0.0                     | 44.1                  | 0.0                     |  |
| X3LYP           | 22.0                           | -39.0                   | 21.1                      | -20.7                   | 44.9                        | 11.6                    | 35.2                      | 0.0                     | 49.2                  | 0.0                     |  |
|                 | <i>Meta-Hybrids</i>            |                         |                           |                         |                             |                         |                           |                         |                       |                         |  |
| M06             | 19.6                           | -47.6                   | 22.6                      | -22.7                   | 43.4                        | 7.0                     | 35.0                      | 0.0                     | 48.4                  | 0.0                     |  |
| M06-2X          | 18.0                           | -48.6                   | 21.1                      | -29.7                   | 44.5                        | 7.9                     | 36.5                      | 0.0                     | 49.0                  | 0.0                     |  |
| M06-HF          | 14.3                           | -48.2                   | 18.4                      | -40.7                   | 42.9                        | 9.6                     | 37.6                      | 0.0                     | 50.7                  | 0.0                     |  |
| TPSSH           | 17.0                           | -43.2                   | 17.7                      | -22.8                   | 41.2                        | 6.9                     | 32.5                      | 0.0                     | 45.2                  | 0.0                     |  |
|                 | <i>Double-Hybrids</i>          |                         |                           |                         |                             |                         |                           |                         |                       |                         |  |
| B2K-PLYP        | 17.9                           | -48.9                   | 17.7                      | -25.2                   | 44.1                        | 8.5                     | 35.3                      | 0.0                     | 49.2                  | 0.0                     |  |
| B2T-PLYP        | 18.9                           | -45.7                   | 18.4                      | -22.8                   | 44.1                        | 9.5                     | 35.1                      | 0.0                     | 49.3                  | 0.0                     |  |
| B2-PLYP         | 18.9                           | -43.7                   | 18.3                      | -20.8                   | 43.8                        | 10.1                    | 34.5                      | 0.0                     | 48.5                  | 0.0                     |  |
| LS1-TPSS        | 13.6                           | -56.4                   | 14.9                      | -29.5                   | 42.0                        | 4.8                     | 33.2                      | 0.0                     | 45.5                  | 0.0                     |  |
| mPW2K-PLYP      | 17.6                           | -49.1                   | 17.3                      | -25.5                   | 44.2                        | 8.7                     | 35.4                      | 0.0                     | 49.0                  | 0.0                     |  |
| mPW2-PLYP       | 19.4                           | -44.6                   | 18.7                      | -22.8                   | 44.6                        | 10.2                    | 35.6                      | 0.0                     | 49.6                  | 0.0                     |  |
| PBE0-DH         | 17.0                           | -56.5                   | 18.9                      | -33.6                   | 42.8                        | 4.0                     | 34.1                      | 0.0                     | 46.1                  | 0.0                     |  |
| revDSD-BLYP     | 17.1                           | -49.1                   | 17.0                      | -25.3                   | 44.3                        | 9.0                     | 36.3                      | 0.0                     | 49.6                  | 0.0                     |  |
| revDSD-PBE      | 16.4                           | -51.9                   | 17.0                      | -26.9                   | 43.1                        | 6.7                     | 35.5                      | 0.0                     | 47.8                  | 0.0                     |  |
| revDSD-PBEP86   | 18.6                           | -49.2                   | 18.7                      | -24.7                   | 43.9                        | 7.6                     | 36.6                      | 0.0                     | 50.0                  | 0.0                     |  |
|                 | <i>Range-Separated Hybrids</i> |                         |                           |                         |                             |                         |                           |                         |                       |                         |  |
| CAM-B3LYP       | 23.8                           | -45.2                   | 22.1                      | -27.8                   | 46.0                        | 9.3                     | 37.3                      | 0.0                     | 51.7                  | 0.0                     |  |
| CAMY-B3LYP      | 21.8                           | -44.3                   | 20.7                      | -26.4                   | 45.3                        | 10.0                    | 36.1                      | 0.0                     | 49.8                  | 0.0                     |  |
| $\omega$ B97    | 23.5                           | -36.0                   | 22.7                      | -35.3                   | 46.4                        | 3.2                     | 40.3                      | 0.0                     | 53.2                  | 0.0                     |  |
| $\omega$ B97X   | 23.8                           | -45.2                   | 22.1                      | -27.8                   | 46.0                        | 9.3                     | 37.3                      | 0.0                     | 51.7                  | 0.0                     |  |
| $\omega$ B97X-D | 23.2                           | -47.5                   | 23.0                      | -28.0                   | 44.6                        | 6.4                     | 36.5                      | 0.0                     | 50.3                  | 0.0                     |  |

**Table S25** (continued).

| XC           | Diels-Alder Reaction        |                         | 1,3-dipolar Cycloaddition |                         | Electrocyclic Rearrangement |                         | Sigmatropic Rearrangement |                         | Double Group Transfer |                         |
|--------------|-----------------------------|-------------------------|---------------------------|-------------------------|-----------------------------|-------------------------|---------------------------|-------------------------|-----------------------|-------------------------|
|              | $\Delta E^\ddagger$         | $\Delta E_{\text{rxn}}$ | $\Delta E^\ddagger$       | $\Delta E_{\text{rxn}}$ | $\Delta E^\ddagger$         | $\Delta E_{\text{rxn}}$ | $\Delta E^\ddagger$       | $\Delta E_{\text{rxn}}$ | $\Delta E^\ddagger$   | $\Delta E_{\text{rxn}}$ |
|              | <i>Dispersion-Corrected</i> |                         |                           |                         |                             |                         |                           |                         |                       |                         |
| BP86-D3(BJ)  | 8.8                         | -47.2                   | 11.2                      | -24.6                   | 39.4                        | 8.4                     | 27.7                      | 0.0                     | 34.7                  | 0.0                     |
| BLYP-D3(BJ)  | 13.1                        | -36.6                   | 13.8                      | -16.2                   | 42.3                        | 13.9                    | 31.0                      | 0.0                     | 40.9                  | 0.0                     |
| PBE-D3(BJ)   | 8.9                         | -49.5                   | 11.2                      | -26.2                   | 38.7                        | 6.8                     | 27.2                      | 0.0                     | 33.6                  | 0.0                     |
| OLYP-D3(BJ)  | 7.6                         | -50.2                   | 12.2                      | -25.8                   | 39.0                        | 6.9                     | 27.5                      | 0.0                     | 36.1                  | 0.0                     |
| OPBE-D3(BJ)  | 3.1                         | -62.3                   | 10.4                      | -34.0                   | 35.5                        | -0.1                    | 24.2                      | 0.0                     | 29.8                  | 0.0                     |
| B3LYP-D3(BJ) | 16.2                        | -42.7                   | 17.3                      | -23.1                   | 44.5                        | 11.9                    | 34.4                      | 0.0                     | 46.0                  | 0.0                     |
| PBE0-D3(BJ)  | 9.3                         | -49.1                   | 11.5                      | -25.9                   | 38.8                        | 6.8                     | 27.3                      | 0.0                     | 33.8                  | 0.0                     |
| M06-2X-D3    | 17.9                        | -48.7                   | 21.0                      | -29.8                   | 44.5                        | 7.9                     | 36.6                      | 0.0                     | 48.9                  | 0.0                     |

**Table S26.** Errors in reaction barriers and reaction energies (kcal mol<sup>-1</sup>) for the various pericyclic reactions, computed with XC/QZ4P//BP86/DZP, compared to CCSDT(Q)/CBS//CCSD(T)/cc-pVTZ.

| XC              | Diels-Alder Reaction |                         | 1,3-dipolar Cycloaddition |                         | Electrocyclic Rearrangement    |                         | Sigmatropic Rearrangement |                         | Double Group Transfer |                         |
|-----------------|----------------------|-------------------------|---------------------------|-------------------------|--------------------------------|-------------------------|---------------------------|-------------------------|-----------------------|-------------------------|
|                 | $\Delta E^\ddagger$  | $\Delta E_{\text{rxn}}$ | $\Delta E^\ddagger$       | $\Delta E_{\text{rxn}}$ | $\Delta E^\ddagger$            | $\Delta E_{\text{rxn}}$ | $\Delta E^\ddagger$       | $\Delta E_{\text{rxn}}$ | $\Delta E^\ddagger$   | $\Delta E_{\text{rxn}}$ |
| VWN             | -18.9                | -17.5                   | -15.2                     | -13.2                   | -7.1                           | -6.1                    | -14.9                     | 0.0                     | -28.2                 | 0.0                     |
|                 |                      |                         |                           |                         | <i>LDA</i>                     |                         |                           |                         |                       |                         |
| BP86            | -4.5                 | 5.4                     | -2.9                      | 8.2                     | -3.8                           | -0.3                    | -8.6                      | 0.0                     | -12.1                 | 0.0                     |
| BLYP            | 1.4                  | 17.5                    | 1.0                       | 17.9                    | -0.7                           | 5.4                     | -5.0                      | 0.0                     | -5.0                  | 0.0                     |
| BEE             | -3.6                 | 4.6                     | -1.1                      | 9.0                     | -4.6                           | -2.2                    | -8.8                      | 0.0                     | -11.8                 | 0.0                     |
| PW91            | -7.3                 | 1.5                     | -5.0                      | 4.9                     | -4.2                           | -1.2                    | -9.0                      | 0.0                     | -14.4                 | 0.0                     |
| PBE             | -6.8                 | 1.4                     | -4.4                      | 5.2                     | -4.5                           | -1.8                    | -9.2                      | 0.0                     | -14.4                 | 0.0                     |
| PBESol          | -13.0                | -9.3                    | -9.5                      | -4.7                    | -6.7                           | -5.3                    | -12.8                     | 0.0                     | -21.8                 | 0.0                     |
| RPBE            | -0.9                 | 9.6                     | 0.9                       | 13.2                    | -3.5                           | -0.3                    | -7.0                      | 0.0                     | -8.5                  | 0.0                     |
| revPBE          | -1.2                 | 8.7                     | 0.8                       | 12.6                    | -3.7                           | -0.6                    | -7.5                      | 0.0                     | -9.0                  | 0.0                     |
| mPBE            | -5.2                 | 3.6                     | -3.0                      | 7.4                     | -4.2                           | -1.4                    | -8.6                      | 0.0                     | -12.8                 | 0.0                     |
| mPW             | -4.1                 | 5.8                     | -2.1                      | 9.2                     | -3.6                           | -0.1                    | -8.0                      | 0.0                     | -11.2                 | 0.0                     |
| HTBS            | -5.8                 | 0.5                     | -2.8                      | 4.9                     | -6.0                           | -3.9                    | -10.7                     | 0.0                     | -14.7                 | 0.0                     |
| OLYP            | 4.4                  | 11.7                    | 5.7                       | 15.4                    | -3.0                           | -1.4                    | -6.1                      | 0.0                     | -4.8                  | 0.0                     |
| OPBE            | -0.3                 | -0.9                    | 3.7                       | 6.6                     | -6.7                           | -8.5                    | -9.9                      | 0.0                     | -11.3                 | 0.0                     |
| XLYP            | 1.7                  | 18.8                    | 1.1                       | 18.7                    | -0.3                           | 6.2                     | -4.4                      | 0.0                     | -4.2                  | 0.0                     |
|                 |                      |                         |                           |                         | <i>Meta-GGAs</i>               |                         |                           |                         |                       |                         |
| M06-L           | -2.6                 | 1.8                     | 1.8                       | 11.8                    | 0.2                            | -2.6                    | -2.8                      | 0.0                     | -4.3                  | 0.0                     |
| MVS             | -6.8                 | -6.6                    | 0.3                       | 4.3                     | -0.7                           | -2.6                    | -8.5                      | 0.0                     | -13.5                 | 0.0                     |
| TPSS            | -4.0                 | 7.4                     | -2.3                      | 9.1                     | -3.2                           | -0.7                    | -5.9                      | 0.0                     | -7.3                  | 0.0                     |
| revTPSS         | -5.0                 | 5.4                     | -3.2                      | 6.0                     | -3.8                           | -2.4                    | -5.3                      | 0.0                     | -5.3                  | 0.0                     |
|                 |                      |                         |                           |                         | <i>Hybrids</i>                 |                         |                           |                         |                       |                         |
| B3LYP           | 3.1                  | 10.2                    | 3.5                       | 10.0                    | 1.4                            | 3.4                     | -1.7                      | 0.0                     | -0.6                  | 0.0                     |
| B3LYP*          | 1.2                  | 9.5                     | 1.6                       | 9.7                     | 0.4                            | 3.1                     | -3.3                      | 0.0                     | -3.5                  | 0.0                     |
| B1LYP           | 4.6                  | 10.5                    | 4.7                       | 9.7                     | 2.3                            | 3.7                     | -0.4                      | 0.0                     | 1.7                   | 0.0                     |
| B1PW91          | 0.1                  | -0.8                    | 3.0                       | 2.1                     | -1.0                           | -2.8                    | -3.7                      | 0.0                     | -4.1                  | 0.0                     |
| BHandH          | -6.4                 | -18.6                   | -3.4                      | -19.1                   | 0.9                            | -4.9                    | -2.5                      | 0.0                     | -7.7                  | 0.0                     |
| BHandHLYP       | 7.6                  | 3.4                     | 8.3                       | 1.1                     | 5.3                            | 2.0                     | 4.5                       | 0.0                     | 8.3                   | 0.0                     |
| KMLYP           | 0.0                  | -12.5                   | 2.7                       | -13.2                   | 3.2                            | -3.3                    | 1.3                       | 0.0                     | 0.0                   | 0.0                     |
| O3LYP           | -21.3                | -27.9                   | -16.9                     | -23.9                   | -6.0                           | -8.2                    | -13.8                     | 0.0                     | -28.4                 | 0.0                     |
| OPBE0           | 1.8                  | -6.6                    | 6.2                       | -0.9                    | -3.4                           | -8.7                    | -5.1                      | 0.0                     | -4.9                  | 0.0                     |
| PBE0            | -3.0                 | -4.9                    | 0.1                       | -1.9                    | -1.6                           | -3.6                    | -4.6                      | 0.0                     | -7.2                  | 0.0                     |
| mPW1PW          | -0.8                 | -1.2                    | 1.9                       | 1.3                     | -0.7                           | -2.2                    | -3.5                      | 0.0                     | -4.6                  | 0.0                     |
| mPW1K           | 1.5                  | -6.3                    | 4.7                       | -4.6                    | 1.2                            | -3.7                    | -0.2                      | 0.0                     | 0.1                   | 0.0                     |
| S12H            | -3.1                 | -5.5                    | 1.1                       | -0.2                    | -0.6                           | -4.0                    | -2.6                      | 0.0                     | -6.1                  | 0.0                     |
| X3LYP           | 2.4                  | 8.7                     | 2.8                       | 8.2                     | 1.5                            | 3.2                     | -1.6                      | 0.0                     | -1.0                  | 0.0                     |
|                 |                      |                         |                           |                         | <i>Meta-Hybrids</i>            |                         |                           |                         |                       |                         |
| M06             | 0.0                  | 0.0                     | 4.3                       | 6.2                     | 0.0                            | -1.5                    | -1.8                      | 0.0                     | -1.8                  | 0.0                     |
| M06-2X          | -1.6                 | -1.0                    | 2.8                       | -0.8                    | 1.1                            | -0.5                    | -0.3                      | 0.0                     | -1.2                  | 0.0                     |
| M06-HF          | -5.3                 | -0.6                    | 0.1                       | -11.8                   | -0.5                           | 1.2                     | 0.8                       | 0.0                     | 0.5                   | 0.0                     |
| TPSSH           | -2.6                 | 4.5                     | -0.6                      | 6.1                     | -2.2                           | -1.6                    | -4.3                      | 0.0                     | -5.0                  | 0.0                     |
|                 |                      |                         |                           |                         | <i>Double-Hybrids</i>          |                         |                           |                         |                       |                         |
| B2K-PLYP        | -1.7                 | -1.3                    | -0.6                      | 3.7                     | 0.7                            | 0.1                     | -1.5                      | 0.0                     | -1.0                  | 0.0                     |
| B2T-PLYP        | -0.7                 | 2.0                     | 0.1                       | 6.1                     | 0.7                            | 1.1                     | -1.7                      | 0.0                     | -0.9                  | 0.0                     |
| B2-PLYP         | -0.7                 | 4.0                     | 0.0                       | 8.1                     | 0.4                            | 1.7                     | -2.3                      | 0.0                     | -1.7                  | 0.0                     |
| LS1-TPSS        | -6.0                 | -8.8                    | -3.4                      | -0.6                    | -1.4                           | -3.7                    | -3.6                      | 0.0                     | -4.7                  | 0.0                     |
| mPW2K-PLYP      | -2.0                 | -1.5                    | -1.0                      | 3.4                     | 0.8                            | 0.3                     | -1.4                      | 0.0                     | -1.2                  | 0.0                     |
| mPW2-PLYP       | -0.2                 | 3.1                     | 0.4                       | 6.1                     | 1.2                            | 1.8                     | -1.2                      | 0.0                     | -0.6                  | 0.0                     |
| PBE0-DH         | -2.6                 | -8.9                    | 0.6                       | -4.7                    | -0.6                           | -4.5                    | -2.7                      | 0.0                     | -4.1                  | 0.0                     |
| revDSD-BLYP     | -2.5                 | -1.5                    | -1.3                      | 3.6                     | 0.9                            | 0.6                     | -0.5                      | 0.0                     | -0.6                  | 0.0                     |
| revDSD-PBE      | -3.2                 | -4.3                    | -1.3                      | 2.0                     | -0.3                           | -1.8                    | -1.3                      | 0.0                     | -2.4                  | 0.0                     |
| revDSD-PBEP86   | -1.0                 | -1.6                    | 0.4                       | 4.2                     | 0.5                            | -0.9                    | -0.2                      | 0.0                     | -0.2                  | 0.0                     |
|                 |                      |                         |                           |                         | <i>Range-Separated Hybrids</i> |                         |                           |                         |                       |                         |
| CAM-B3LYP       | 4.2                  | 2.5                     | 3.8                       | 1.1                     | 2.6                            | 0.9                     | 0.5                       | 0.0                     | 1.5                   | 0.0                     |
| CAMY-B3LYP      | 2.2                  | 3.4                     | 2.4                       | 2.5                     | 1.9                            | 1.6                     | -0.7                      | 0.0                     | -0.4                  | 0.0                     |
| $\omega$ B97    | 3.9                  | 11.7                    | 4.4                       | -6.4                    | 3.0                            | -5.3                    | 3.5                       | 0.0                     | 3.0                   | 0.0                     |
| $\omega$ B97X   | 4.2                  | 2.5                     | 3.8                       | 1.1                     | 2.6                            | 0.9                     | 0.5                       | 0.0                     | 1.5                   | 0.0                     |
| $\omega$ B97X-D | 3.6                  | 0.1                     | 4.7                       | 0.9                     | 1.2                            | -2.1                    | -0.3                      | 0.0                     | 0.1                   | 0.0                     |



**Table S26** (continued).

| XC           | Diels-Alder<br>Reaction     |                         | 1,3-dipolar<br>Cycloaddition |                         | Electrocyclic<br>Rearrangement |                         | Sigmatropic<br>Rearrangement |                         | Double Group<br>Transfer |                         |
|--------------|-----------------------------|-------------------------|------------------------------|-------------------------|--------------------------------|-------------------------|------------------------------|-------------------------|--------------------------|-------------------------|
|              | $\Delta E^\ddagger$         | $\Delta E_{\text{rxn}}$ | $\Delta E^\ddagger$          | $\Delta E_{\text{rxn}}$ | $\Delta E^\ddagger$            | $\Delta E_{\text{rxn}}$ | $\Delta E^\ddagger$          | $\Delta E_{\text{rxn}}$ | $\Delta E^\ddagger$      | $\Delta E_{\text{rxn}}$ |
|              | <i>Dispersion-Corrected</i> |                         |                              |                         |                                |                         |                              |                         |                          |                         |
| BP86-D3(BJ)  | -10.8                       | 0.4                     | -7.1                         | 4.3                     | -4.0                           | 0.0                     | -9.1                         | 0.0                     | -15.5                    | 0.0                     |
| BLYP-D3(BJ)  | -6.5                        | 11.1                    | -4.5                         | 12.7                    | -1.1                           | 5.5                     | -5.8                         | 0.0                     | -9.3                     | 0.0                     |
| PBE-D3(BJ)   | -10.7                       | -1.9                    | -7.1                         | 2.7                     | -4.7                           | -1.7                    | -9.6                         | 0.0                     | -16.6                    | 0.0                     |
| OLYP-D3(BJ)  | -12.0                       | -2.6                    | -6.1                         | 3.1                     | -4.4                           | -1.6                    | -9.3                         | 0.0                     | -14.1                    | 0.0                     |
| OPBE-D3(BJ)  | -16.5                       | -14.7                   | -7.9                         | -5.1                    | -7.9                           | -8.6                    | -12.6                        | 0.0                     | -20.4                    | 0.0                     |
| B3LYP-D3(BJ) | -3.4                        | 5.0                     | -1.0                         | 5.8                     | 1.1                            | 3.5                     | -2.4                         | 0.0                     | -4.2                     | 0.0                     |
| PBE0-D3(BJ)  | -10.3                       | -1.5                    | -6.8                         | 3.0                     | -4.6                           | -1.7                    | -9.5                         | 0.0                     | -16.4                    | 0.0                     |
| M06-2X-D3    | -1.7                        | -1.1                    | 2.7                          | -0.9                    | 1.1                            | -0.5                    | -0.2                         | 0.0                     | -1.3                     | 0.0                     |

**Table S27.** Mean error (ME), mean absolute error (MAE), maximum unsigned error (MUE) and standard deviation (SD) of reaction barriers and energies (kcal mol<sup>-1</sup>) for the various pericyclic reactions, computed with XC/QZ4P//BP86/DZP compared to CCSDT(Q)/CBS//CCSD(T)/cc-pVTZ.

| XC              | $\Delta E^\ddagger$ |      |      |     | $\Delta E_{\text{rxn}}$ |                                |      |     | Total |      |      |     |
|-----------------|---------------------|------|------|-----|-------------------------|--------------------------------|------|-----|-------|------|------|-----|
|                 | ME                  | MAE  | MUE  | SD  | ME                      | MAE                            | MUE  | SD  | ME    | MAE  | MUE  | SD  |
| VWN             | -16.9               | 16.9 | 28.2 | 6.8 | -12.2                   | 12.2                           | 17.5 | 4.7 | -15.1 | 15.1 | 28.2 | 6.5 |
|                 |                     |      |      |     |                         | <i>LDA</i>                     |      |     |       |      |      |     |
|                 |                     |      |      |     |                         | <i>GGAs</i>                    |      |     |       |      |      |     |
| BP86            | -6.4                | 6.4  | 12.1 | 3.5 | 4.4                     | 4.6                            | 8.2  | 3.3 | -2.3  | 5.7  | 12.1 | 3.5 |
| BLYP            | -1.7                | 2.6  | 5.0  | 1.9 | 13.6                    | 13.6                           | 17.9 | 5.8 | 4.0   | 6.7  | 17.9 | 6.5 |
| BEE             | -6.0                | 6.0  | 11.8 | 3.8 | 3.8                     | 5.2                            | 9.0  | 2.8 | -2.3  | 5.7  | 11.8 | 3.5 |
| PW91            | -8.0                | 8.0  | 14.4 | 3.6 | 1.7                     | 2.5                            | 4.9  | 1.7 | -4.3  | 5.9  | 14.4 | 4.0 |
| PBE             | -7.9                | 7.9  | 14.4 | 3.7 | 1.6                     | 2.8                            | 5.2  | 1.7 | -4.3  | 5.9  | 14.4 | 4.0 |
| PBEsol          | -12.8               | 12.8 | 21.8 | 5.1 | -6.4                    | 6.4                            | 9.3  | 2.0 | -10.4 | 10.4 | 21.8 | 5.2 |
| RPBE            | -3.8                | 4.2  | 8.5  | 3.1 | 7.5                     | 7.7                            | 13.2 | 5.4 | 0.4   | 5.5  | 13.2 | 4.5 |
| revPBE          | -4.1                | 4.4  | 9.0  | 3.3 | 6.9                     | 7.3                            | 12.6 | 5.0 | 0.0   | 5.5  | 12.6 | 4.2 |
| mPBE            | -6.8                | 6.8  | 12.8 | 3.6 | 3.2                     | 4.1                            | 7.4  | 2.5 | -3.0  | 5.8  | 12.8 | 3.5 |
| mPW             | -5.8                | 5.8  | 11.2 | 3.3 | 4.9                     | 5.0                            | 9.2  | 3.7 | -1.8  | 5.5  | 11.2 | 3.5 |
| HTBS            | -8.0                | 8.0  | 14.7 | 4.2 | 0.5                     | 3.1                            | 4.9  | 1.8 | -4.8  | 6.2  | 14.7 | 4.2 |
| OLYP            | -0.8                | 4.8  | 6.1  | 1.1 | 8.6                     | 9.5                            | 15.4 | 5.9 | 2.7   | 6.6  | 15.4 | 4.3 |
| OPBE            | -4.9                | 6.4  | 11.3 | 4.0 | -0.9                    | 5.3                            | 8.5  | 3.2 | -3.4  | 6.0  | 11.3 | 3.8 |
| XLYP            | -1.2                | 2.4  | 4.4  | 1.7 | 14.5                    | 14.5                           | 18.8 | 5.9 | 4.7   | 6.9  | 18.8 | 7.0 |
|                 |                     |      |      |     |                         | <i>Meta-GGAs</i>               |      |     |       |      |      |     |
| M06-L           | -1.5                | 2.3  | 4.3  | 1.4 | 3.7                     | 5.4                            | 11.8 | 4.5 | 0.4   | 3.5  | 11.8 | 3.3 |
| MVS             | -5.8                | 6.0  | 13.5 | 5.0 | -1.6                    | 4.5                            | 6.6  | 1.6 | -4.3  | 5.4  | 13.5 | 4.1 |
| TPSS            | -4.5                | 4.5  | 7.3  | 1.8 | 5.2                     | 5.7                            | 9.1  | 3.6 | -0.9  | 5.0  | 9.1  | 2.7 |
| revTPSS         | -4.5                | 4.5  | 5.3  | 0.9 | 3.0                     | 4.6                            | 6.0  | 1.6 | -1.7  | 4.5  | 6.0  | 1.2 |
|                 |                     |      |      |     |                         | <i>Hybrids</i>                 |      |     |       |      |      |     |
| B3LYP           | 1.1                 | 2.1  | 3.5  | 1.1 | 7.8                     | 7.8                            | 10.2 | 3.2 | 3.6   | 4.2  | 10.2 | 3.5 |
| B3LYP*          | -0.7                | 2.0  | 3.5  | 1.2 | 7.4                     | 7.4                            | 9.7  | 3.1 | 2.3   | 4.0  | 9.7  | 3.4 |
| B1LYP           | 2.6                 | 2.7  | 4.7  | 1.7 | 7.9                     | 7.9                            | 10.5 | 3.0 | 4.6   | 4.7  | 10.5 | 3.4 |
| B1PW91          | -1.1                | 2.4  | 4.1  | 1.5 | -0.5                    | 1.9                            | 2.8  | 0.8 | -0.9  | 2.2  | 4.1  | 1.4 |
| BHandH          | -3.8                | 4.2  | 7.7  | 2.5 | -14.2                   | 14.2                           | 19.1 | 6.6 | -7.7  | 7.9  | 19.1 | 6.6 |
| BHandHLYP       | 6.8                 | 6.8  | 8.3  | 1.6 | 2.1                     | 2.1                            | 3.4  | 0.9 | 5.0   | 5.0  | 8.3  | 2.7 |
| KMLYP           | 1.4                 | 1.5  | 3.2  | 1.3 | -9.6                    | 9.6                            | 13.2 | 4.5 | -2.7  | 4.5  | 13.2 | 5.0 |
| O3LYP           | -17.3               | 17.3 | 28.4 | 7.5 | -20.0                   | 20.0                           | 27.9 | 8.5 | -18.3 | 18.3 | 28.4 | 8.0 |
| OPBE0           | -1.1                | 4.3  | 6.2  | 1.5 | -5.4                    | 5.4                            | 8.7  | 3.3 | -2.7  | 4.7  | 8.7  | 2.4 |
| PBE0            | -3.3                | 3.3  | 7.2  | 2.5 | -3.4                    | 3.4                            | 4.9  | 1.2 | -3.3  | 3.4  | 7.2  | 2.1 |
| mPW1PW          | -1.5                | 2.3  | 4.6  | 1.5 | -0.7                    | 1.5                            | 2.2  | 0.4 | -1.2  | 2.0  | 4.6  | 1.3 |
| mPW1K           | 1.5                 | 1.5  | 4.7  | 1.7 | -4.8                    | 4.8                            | 6.3  | 1.1 | -0.9  | 2.8  | 6.3  | 2.2 |
| S12H            | -2.3                | 2.7  | 6.1  | 1.9 | -3.2                    | 3.2                            | 5.5  | 2.2 | -2.6  | 2.9  | 6.1  | 2.0 |
| X3LYP           | 0.8                 | 1.9  | 2.8  | 0.7 | 6.7                     | 6.7                            | 8.7  | 2.5 | 3.0   | 3.7  | 8.7  | 2.8 |
|                 |                     |      |      |     |                         | <i>Meta-Hybrids</i>            |      |     |       |      |      |     |
| M06             | 0.1                 | 1.6  | 4.3  | 1.6 | 1.6                     | 2.6                            | 6.2  | 2.6 | 0.7   | 2.0  | 6.2  | 2.1 |
| M06-2X          | 0.2                 | 1.4  | 2.8  | 0.8 | -0.8                    | 0.8                            | 1.0  | 0.2 | -0.2  | 1.2  | 2.8  | 0.7 |
| M06-HF          | -0.9                | 1.4  | 5.3  | 1.9 | -3.7                    | 4.5                            | 11.8 | 5.2 | -2.0  | 2.6  | 11.8 | 3.8 |
| TPSSH           | -2.9                | 2.9  | 5.0  | 1.6 | 3.0                     | 4.0                            | 6.1  | 1.9 | -0.7  | 3.3  | 6.1  | 1.8 |
|                 |                     |      |      |     |                         | <i>Double-Hybrids</i>          |      |     |       |      |      |     |
| B2K-PLYP        | -0.8                | 1.1  | 1.7  | 0.4 | 0.8                     | 1.7                            | 3.7  | 1.5 | -0.2  | 1.3  | 3.7  | 1.0 |
| B2T-PLYP        | -0.5                | 0.8  | 1.7  | 0.5 | 3.0                     | 3.0                            | 6.1  | 2.2 | 0.8   | 1.6  | 6.1  | 1.8 |
| B2-PLYP         | -0.9                | 1.0  | 2.3  | 0.9 | 4.6                     | 4.6                            | 8.1  | 2.7 | 1.2   | 2.3  | 8.1  | 2.5 |
| LS1-TPSS        | -3.8                | 3.8  | 6.0  | 1.5 | -4.3                    | 4.3                            | 8.8  | 3.3 | -4.0  | 4.0  | 8.8  | 2.4 |
| mPW2K-PLYP      | -1.0                | 1.3  | 2.0  | 0.4 | 0.7                     | 1.7                            | 3.4  | 1.3 | -0.3  | 1.4  | 3.4  | 0.9 |
| mPW2-PLYP       | -0.1                | 0.7  | 1.2  | 0.4 | 3.6                     | 3.6                            | 6.1  | 1.8 | 1.3   | 1.8  | 6.1  | 1.8 |
| PBE0-DH         | -1.9                | 2.1  | 4.1  | 1.3 | -6.0                    | 6.0                            | 8.9  | 2.0 | -3.4  | 3.6  | 8.9  | 2.5 |
| revDSD-BLYP     | -0.8                | 1.1  | 2.5  | 0.7 | 0.9                     | 1.9                            | 3.6  | 1.3 | -0.2  | 1.4  | 3.6  | 1.0 |
| revDSD-PBE      | -1.7                | 1.7  | 3.2  | 1.0 | -1.3                    | 2.7                            | 4.3  | 1.1 | -1.6  | 2.1  | 4.3  | 1.1 |
| revDSD-PBEP86   | -0.1                | 0.4  | 1.0  | 0.3 | 0.6                     | 2.2                            | 4.2  | 1.4 | 0.2   | 1.1  | 4.2  | 1.2 |
|                 |                     |      |      |     |                         | <i>Range-Separated Hybrids</i> |      |     |       |      |      |     |
| CAM-B3LYP       | 2.5                 | 2.5  | 4.2  | 1.4 | 1.5                     | 1.5                            | 2.5  | 0.7 | 2.1   | 2.1  | 4.2  | 1.3 |
| CAMY-B3LYP      | 1.1                 | 1.5  | 2.4  | 0.8 | 2.5                     | 2.5                            | 3.4  | 0.7 | 1.6   | 1.9  | 3.4  | 0.9 |
| $\omega$ B97    | 3.6                 | 3.6  | 4.4  | 0.6 | 0.0                     | 7.8                            | 11.7 | 2.8 | 2.2   | 5.1  | 11.7 | 2.7 |
| $\omega$ B97X   | 2.5                 | 2.5  | 4.2  | 1.4 | 1.5                     | 1.5                            | 2.5  | 0.7 | 2.1   | 2.1  | 4.2  | 1.3 |
| $\omega$ B97X-D | 1.9                 | 2.0  | 4.7  | 1.9 | -0.3                    | 1.0                            | 2.1  | 0.8 | 1.0   | 1.6  | 4.7  | 1.6 |

**Table S27** (continued).

| XC           | $\Delta E^\ddagger$         |      |      |     | $\Delta E_{\text{rxn}}$ |     |      |     | Total |      |      |     |
|--------------|-----------------------------|------|------|-----|-------------------------|-----|------|-----|-------|------|------|-----|
|              | ME                          | MAE  | MUE  | SD  | ME                      | MAE | MUE  | SD  | ME    | MAE  | MUE  | SD  |
|              | <i>Dispersion-Corrected</i> |      |      |     |                         |     |      |     |       |      |      |     |
| BP86-D3(BJ)  | -9.3                        | 9.3  | 15.5 | 3.8 | 1.6                     | 1.6 | 4.3  | 1.9 | -5.2  | 6.4  | 15.5 | 4.9 |
| BLYP-D3(BJ)  | -5.4                        | 5.4  | 9.3  | 2.7 | 9.7                     | 9.7 | 12.7 | 3.1 | 0.2   | 7.0  | 12.7 | 3.5 |
| PBE-D3(BJ)   | -9.7                        | 9.7  | 16.6 | 4.0 | -0.3                    | 2.1 | 2.7  | 0.4 | -6.2  | 6.9  | 16.6 | 4.9 |
| OLYP-D3(BJ)  | -9.2                        | 9.2  | 14.1 | 3.6 | -0.3                    | 2.4 | 3.1  | 0.6 | -5.9  | 6.6  | 14.1 | 4.4 |
| OPBE-D3(BJ)  | -13.1                       | 13.1 | 20.4 | 4.9 | -9.4                    | 9.4 | 14.7 | 3.9 | -11.7 | 11.7 | 20.4 | 4.9 |
| B3LYP-D3(BJ) | -2.0                        | 2.4  | 4.2  | 1.3 | 4.7                     | 4.7 | 5.8  | 1.0 | 0.5   | 3.3  | 5.8  | 1.6 |
| PBE0-D3(BJ)  | -9.5                        | 9.5  | 16.4 | 4.0 | 0.0                     | 2.0 | 3.0  | 0.7 | -6.0  | 6.7  | 16.4 | 4.8 |
| M06-2X-D3    | 0.1                         | 1.4  | 2.7  | 0.8 | -0.8                    | 0.8 | 1.1  | 0.2 | -0.2  | 1.2  | 2.7  | 0.7 |

**Table S28.** Reaction barriers and reaction energies (kcal mol<sup>-1</sup>) for the various pericyclic reactions, computed with XC/TZ2P//BP86/TZ2P.

| XC              | Diels-Alder Reaction           |                         | 1,3-dipolar Cycloaddition |                         | Electrocyclic Rearrangement |                         | Sigmatropic Rearrangement |                         | Double Group Transfer |                         |  |
|-----------------|--------------------------------|-------------------------|---------------------------|-------------------------|-----------------------------|-------------------------|---------------------------|-------------------------|-----------------------|-------------------------|--|
|                 | $\Delta E^\ddagger$            | $\Delta E_{\text{rxn}}$ | $\Delta E^\ddagger$       | $\Delta E_{\text{rxn}}$ | $\Delta E^\ddagger$         | $\Delta E_{\text{rxn}}$ | $\Delta E^\ddagger$       | $\Delta E_{\text{rxn}}$ | $\Delta E^\ddagger$   | $\Delta E_{\text{rxn}}$ |  |
|                 | <i>LDA</i>                     |                         |                           |                         |                             |                         |                           |                         |                       |                         |  |
| VWN             | 1.0                            | -64.5                   | 3.3                       | -41.5                   | 36.6                        | 3.0                     | 22.0                      | 0.0                     | 22.1                  | 0.0                     |  |
|                 | <i>GGAs</i>                    |                         |                           |                         |                             |                         |                           |                         |                       |                         |  |
| BP86            | 15.2                           | -41.6                   | 15.5                      | -20.1                   | 39.9                        | 8.8                     | 28.2                      | 0.0                     | 38.1                  | 0.0                     |  |
| BLYP            | 21.2                           | -29.6                   | 19.4                      | -10.6                   | 43.0                        | 14.3                    | 31.9                      | 0.0                     | 45.2                  | 0.0                     |  |
| BEE             | 16.4                           | -42.3                   | 17.4                      | -19.1                   | 39.3                        | 7.1                     | 28.1                      | 0.0                     | 38.5                  | 0.0                     |  |
| PW91            | 12.6                           | -45.5                   | 13.5                      | -23.3                   | 39.6                        | 8.0                     | 27.9                      | 0.0                     | 35.8                  | 0.0                     |  |
| PBE             | 13.1                           | -45.6                   | 14.1                      | -22.9                   | 39.3                        | 7.4                     | 27.6                      | 0.0                     | 35.9                  | 0.0                     |  |
| PBEsol          | 6.9                            | -56.1                   | 9.1                       | -32.8                   | 37.1                        | 3.8                     | 24.0                      | 0.0                     | 28.4                  | 0.0                     |  |
| RPBE            | 19.0                           | -37.3                   | 19.4                      | -14.9                   | 40.1                        | 9.0                     | 29.9                      | 0.0                     | 41.8                  | 0.0                     |  |
| revPBE          | 18.7                           | -38.1                   | 19.2                      | -15.5                   | 40.1                        | 8.5                     | 29.5                      | 0.0                     | 41.3                  | 0.0                     |  |
| mPBE            | 14.6                           | -43.3                   | 15.5                      | -20.8                   | 39.6                        | 7.9                     | 28.3                      | 0.0                     | 37.5                  | 0.0                     |  |
| mPW             | 15.7                           | -41.2                   | 16.3                      | -19.0                   | 40.2                        | 8.9                     | 28.9                      | 0.0                     | 39.0                  | 0.0                     |  |
| HTBS            | 14.2                           | -46.4                   | 15.8                      | -23.1                   | 37.9                        | 5.4                     | 26.1                      | 0.0                     | 35.5                  | 0.0                     |  |
| OLYP            | 24.3                           | -35.1                   | 24.2                      | -12.6                   | 41.0                        | 8.0                     | 30.9                      | 0.0                     | 45.6                  | 0.0                     |  |
| OPBE            | 19.8                           | -47.3                   | 22.4                      | -21.0                   | 37.4                        | 1.2                     | 27.1                      | 0.0                     | 39.1                  | 0.0                     |  |
| XLYP            | 21.4                           | -28.4                   | 19.4                      | -9.7                    | 43.4                        | 15.1                    | 32.5                      | 0.0                     | 45.9                  | 0.0                     |  |
|                 | <i>Meta-GGAs</i>               |                         |                           |                         |                             |                         |                           |                         |                       |                         |  |
| M06-L           | 16.8                           | -44.8                   | 19.7                      | -16.6                   | 43.8                        | 6.9                     | 34.2                      | 0.0                     | 46.1                  | 0.0                     |  |
| MVS             | 12.2                           | -54.2                   | 18.1                      | -24.5                   | 43.1                        | 6.5                     | 28.2                      | 0.0                     | 36.7                  | 0.0                     |  |
| TPSS            | 15.7                           | -39.5                   | 16.1                      | -19.0                   | 40.6                        | 8.5                     | 31.0                      | 0.0                     | 42.9                  | 0.0                     |  |
| revTPSS         | 14.7                           | -41.7                   | 15.1                      | -22.1                   | 40.0                        | 6.9                     | 31.5                      | 0.0                     | 44.8                  | 0.0                     |  |
|                 | <i>Hybrids</i>                 |                         |                           |                         |                             |                         |                           |                         |                       |                         |  |
| B3LYP           | 22.6                           | -37.2                   | 21.7                      | -18.6                   | 45.1                        | 12.2                    | 35.1                      | 0.0                     | 49.5                  | 0.0                     |  |
| B3LYP*          | 20.7                           | -37.8                   | 19.9                      | -18.9                   | 44.1                        | 11.9                    | 33.5                      | 0.0                     | 46.6                  | 0.0                     |  |
| B1LYP           | 24.0                           | -37.0                   | 22.9                      | -19.0                   | 46.0                        | 12.5                    | 36.4                      | 0.0                     | 51.8                  | 0.0                     |  |
| B1PW91          | 19.6                           | -48.1                   | 21.2                      | -26.4                   | 42.8                        | 6.3                     | 33.0                      | 0.0                     | 46.0                  | 0.0                     |  |
| BHandH          | 12.8                           | -66.4                   | 14.8                      | -47.9                   | 44.4                        | 3.9                     | 34.0                      | 0.0                     | 42.4                  | 0.0                     |  |
| BHandHLYP       | 26.6                           | -44.5                   | 26.4                      | -27.7                   | 48.8                        | 10.6                    | 41.0                      | 0.0                     | 58.3                  | 0.0                     |  |
| KMLYP           | 19.0                           | -60.4                   | 20.8                      | -42.0                   | 46.7                        | 5.4                     | 37.8                      | 0.0                     | 50.1                  | 0.0                     |  |
| O3LYP           | -1.6                           | -75.1                   | 1.5                       | -52.4                   | 37.6                        | 0.7                     | 22.9                      | 0.0                     | 21.8                  | 0.0                     |  |
| OPBE0           | 21.5                           | -53.6                   | 24.6                      | -28.9                   | 40.7                        | 0.7                     | 31.6                      | 0.0                     | 45.3                  | 0.0                     |  |
| PBE0            | 16.6                           | -52.2                   | 18.4                      | -30.3                   | 42.2                        | 5.5                     | 32.1                      | 0.0                     | 43.0                  | 0.0                     |  |
| mPW1PW          | 18.7                           | -48.5                   | 20.2                      | -27.2                   | 43.0                        | 6.8                     | 33.2                      | 0.0                     | 45.6                  | 0.0                     |  |
| mPW1K           | 20.7                           | -53.9                   | 22.8                      | -33.2                   | 44.9                        | 5.3                     | 36.4                      | 0.0                     | 50.2                  | 0.0                     |  |
| S12H            | 16.4                           | -52.5                   | 19.4                      | -28.4                   | 43.2                        | 5.3                     | 34.1                      | 0.0                     | 44.2                  | 0.0                     |  |
| X3LYP           | 21.9                           | -38.8                   | 21.0                      | -20.4                   | 45.2                        | 12.0                    | 35.1                      | 0.0                     | 49.1                  | 0.0                     |  |
|                 | <i>Meta-Hybrids</i>            |                         |                           |                         |                             |                         |                           |                         |                       |                         |  |
| M06             | 19.3                           | -47.4                   | 22.3                      | -22.3                   | 43.7                        | 7.4                     | 34.9                      | 0.0                     | 48.4                  | 0.0                     |  |
| M06-2X          | 17.6                           | -49.0                   | 21.0                      | -29.8                   | 44.6                        | 8.1                     | 36.2                      | 0.0                     | 48.7                  | 0.0                     |  |
| M06-HF          | 14.5                           | -48.9                   | 19.4                      | -41.0                   | 42.9                        | 9.2                     | 37.3                      | 0.0                     | 50.8                  | 0.0                     |  |
| TPSSH           | 17.0                           | -42.6                   | 17.7                      | -22.2                   | 41.6                        | 7.6                     | 32.5                      | 0.0                     | 45.2                  | 0.0                     |  |
|                 | <i>Double-Hybrids</i>          |                         |                           |                         |                             |                         |                           |                         |                       |                         |  |
| B2K-PLYP        | 18.1                           | -48.8                   | 18.5                      | -25.1                   | 44.8                        | 8.6                     | 35.6                      | 0.0                     | 49.0                  | 0.0                     |  |
| B2T-PLYP        | 19.1                           | -45.5                   | 19.0                      | -22.6                   | 44.7                        | 9.6                     | 35.3                      | 0.0                     | 49.0                  | 0.0                     |  |
| B2-PLYP         | 19.1                           | -43.5                   | 18.8                      | -20.7                   | 44.4                        | 10.3                    | 34.7                      | 0.0                     | 48.2                  | 0.0                     |  |
| LS1-TPSS        | 14.2                           | -56.0                   | 16.2                      | -29.2                   | 43.0                        | 5.0                     | 33.6                      | 0.0                     | 45.3                  | 0.0                     |  |
| mPW2K-PLYP      | 17.8                           | -48.9                   | 18.1                      | -25.3                   | 44.9                        | 8.8                     | 35.7                      | 0.0                     | 48.8                  | 0.0                     |  |
| mPW2-PLYP       | 19.4                           | -44.5                   | 19.1                      | -22.6                   | 45.2                        | 10.4                    | 35.8                      | 0.0                     | 49.4                  | 0.0                     |  |
| PBE0-DH         | 16.9                           | -56.4                   | 19.1                      | -33.3                   | 43.3                        | 4.4                     | 34.1                      | 0.0                     | 45.8                  | 0.0                     |  |
| revDSD-BLYP     | 17.0                           | -49.3                   | 17.6                      | -25.5                   | 45.0                        | 9.0                     | 36.5                      | 0.0                     | 49.1                  | 0.0                     |  |
| revDSD-PBE      | 16.3                           | -52.3                   | 17.5                      | -27.1                   | 43.8                        | 6.8                     | 35.7                      | 0.0                     | 47.1                  | 0.0                     |  |
| revDSD-PBEP86   | 18.5                           | -49.6                   | 19.2                      | -25.0                   | 44.6                        | 7.7                     | 36.8                      | 0.0                     | 49.3                  | 0.0                     |  |
|                 | <i>Range-Separated Hybrids</i> |                         |                           |                         |                             |                         |                           |                         |                       |                         |  |
| CAM-B3LYP       | 23.4                           | -45.2                   | 22.9                      | -27.6                   | 46.2                        | 9.6                     | 37.2                      | 0.0                     | 51.6                  | 0.0                     |  |
| CAMY-B3LYP      | 21.5                           | -44.2                   | 20.6                      | -26.2                   | 45.5                        | 10.3                    | 36.0                      | 0.0                     | 49.6                  | 0.0                     |  |
| $\omega$ B97    | 23.0                           | -55.5                   | 22.5                      | -34.7                   | 46.7                        | 4.0                     | 40.1                      | 0.0                     | 53.3                  | 0.0                     |  |
| $\omega$ B97X   | 22.5                           | -51.9                   | 22.1                      | -32.0                   | 46.2                        | 6.0                     | 38.7                      | 0.0                     | 51.8                  | 0.0                     |  |
| $\omega$ B97X-D | 23.0                           | -47.5                   | 22.9                      | -27.7                   | 45.0                        | 6.8                     | 36.4                      | 0.0                     | 50.3                  | 0.0                     |  |

**Table S28** (continued).

| XC           | Diels-Alder Reaction        |                         | 1,3-dipolar Cycloaddition |                         | Electrocyclic Rearrangement |                         | Sigmatropic Rearrangement |                         | Double Group Transfer |                         |
|--------------|-----------------------------|-------------------------|---------------------------|-------------------------|-----------------------------|-------------------------|---------------------------|-------------------------|-----------------------|-------------------------|
|              | $\Delta E^\ddagger$         | $\Delta E_{\text{rxn}}$ | $\Delta E^\ddagger$       | $\Delta E_{\text{rxn}}$ | $\Delta E^\ddagger$         | $\Delta E_{\text{rxn}}$ | $\Delta E^\ddagger$       | $\Delta E_{\text{rxn}}$ | $\Delta E^\ddagger$   | $\Delta E_{\text{rxn}}$ |
|              | <i>Dispersion-Corrected</i> |                         |                           |                         |                             |                         |                           |                         |                       |                         |
| BP86-D3(BJ)  | 9.0                         | -46.5                   | 11.3                      | -24.0                   | 39.7                        | 9.0                     | 27.7                      | 0.0                     | 34.7                  | 0.0                     |
| BLYP-D3(BJ)  | 13.3                        | -36.0                   | 13.9                      | -15.7                   | 42.6                        | 14.4                    | 31.0                      | 0.0                     | 40.8                  | 0.0                     |
| PBE-D3(BJ)   | 9.1                         | -48.7                   | 11.4                      | -25.5                   | 39.1                        | 7.5                     | 27.3                      | 0.0                     | 33.6                  | 0.0                     |
| OLYP-D3(BJ)  | 7.9                         | -49.3                   | 12.5                      | -24.9                   | 39.5                        | 7.8                     | 27.7                      | 0.0                     | 36.3                  | 0.0                     |
| OPBE-D3(BJ)  | 3.6                         | -61.1                   | 11.0                      | -32.6                   | 36.2                        | 1.1                     | 24.3                      | 0.0                     | 30.0                  | 0.0                     |
| B3LYP-D3(BJ) | 16.2                        | -42.4                   | 17.3                      | -22.8                   | 44.7                        | 12.3                    | 34.4                      | 0.0                     | 45.9                  | 0.0                     |
| PBE0-D3(BJ)  | 13.1                        | -54.9                   | 16.0                      | -32.6                   | 42.1                        | 5.6                     | 31.9                      | 0.0                     | 41.0                  | 0.0                     |
| M06-2X-D3    | 17.5                        | -49.1                   | 20.9                      | -29.9                   | 44.6                        | 8.1                     | 36.2                      | 0.0                     | 48.6                  | 0.0                     |

**Table S29.** Errors in reaction barriers and reaction energies (kcal mol<sup>-1</sup>) for the various pericyclic reactions, computed with XC/TZ2P//BP86/TZ2P, compared to CCSDT(Q)/CBS//CCSD(T)/cc-pVTZ.

| XC              | Diels-Alder Reaction           |                         | 1,3-dipolar Cycloaddition |                         | Electrocyclic Rearrangement |                         | Sigmatropic Rearrangement |                         | Double Group Transfer |                         |  |
|-----------------|--------------------------------|-------------------------|---------------------------|-------------------------|-----------------------------|-------------------------|---------------------------|-------------------------|-----------------------|-------------------------|--|
|                 | $\Delta E^\ddagger$            | $\Delta E_{\text{rxn}}$ | $\Delta E^\ddagger$       | $\Delta E_{\text{rxn}}$ | $\Delta E^\ddagger$         | $\Delta E_{\text{rxn}}$ | $\Delta E^\ddagger$       | $\Delta E_{\text{rxn}}$ | $\Delta E^\ddagger$   | $\Delta E_{\text{rxn}}$ |  |
|                 | <i>LDA</i>                     |                         |                           |                         |                             |                         |                           |                         |                       |                         |  |
| VWN             | -18.6                          | -16.9                   | -15.0                     | -12.6                   | -6.8                        | -5.5                    | -14.8                     | 0.0                     | -28.1                 | 0.0                     |  |
|                 | <i>GGAs</i>                    |                         |                           |                         |                             |                         |                           |                         |                       |                         |  |
| BP86            | -4.4                           | 6.1                     | -2.8                      | 8.8                     | -3.5                        | 0.4                     | -8.6                      | 0.0                     | -12.1                 | 0.0                     |  |
| BLYP            | 1.6                            | 18.1                    | 1.1                       | 18.3                    | -0.4                        | 5.9                     | -4.9                      | 0.0                     | -5.0                  | 0.0                     |  |
| BEE             | -3.2                           | 5.4                     | -0.9                      | 9.8                     | -4.1                        | -1.4                    | -9.7                      | 0.0                     | -11.7                 | 0.0                     |  |
| PW91            | -7.0                           | 2.2                     | -4.8                      | 5.6                     | -3.8                        | -0.4                    | -8.9                      | 0.0                     | -14.4                 | 0.0                     |  |
| PBE             | -6.5                           | 2.1                     | -4.2                      | 6.0                     | -4.1                        | -1.1                    | -9.2                      | 0.0                     | -14.3                 | 0.0                     |  |
| PBESol          | -12.7                          | -8.5                    | -9.2                      | -3.9                    | -6.3                        | -4.7                    | -12.8                     | 0.0                     | -21.8                 | 0.0                     |  |
| RPBE            | -0.6                           | 10.4                    | 1.1                       | 14.0                    | -3.3                        | 0.6                     | -6.9                      | 0.0                     | -8.4                  | 0.0                     |  |
| revPBE          | -0.9                           | 9.6                     | 0.9                       | 13.4                    | -3.3                        | 0.1                     | -7.3                      | 0.0                     | -8.9                  | 0.0                     |  |
| mPBE            | -5.0                           | 4.4                     | -2.8                      | 8.1                     | -3.8                        | -0.5                    | -8.5                      | 0.0                     | -12.7                 | 0.0                     |  |
| mPW             | -3.9                           | 6.5                     | -2.0                      | 9.9                     | -3.2                        | 0.5                     | -7.9                      | 0.0                     | -11.2                 | 0.0                     |  |
| HTBS            | -5.4                           | 1.3                     | -2.5                      | 5.8                     | -5.5                        | -3.1                    | -10.7                     | 0.0                     | -14.7                 | 0.0                     |  |
| OLYP            | 4.7                            | 12.6                    | 5.9                       | 16.3                    | -2.4                        | -0.4                    | -5.9                      | 0.0                     | -4.6                  | 0.0                     |  |
| OPBE            | 0.2                            | 0.4                     | 4.1                       | 7.9                     | -6.0                        | -7.3                    | -9.7                      | 0.0                     | -11.1                 | 0.0                     |  |
| XLYP            | 1.8                            | 19.3                    | 1.1                       | 19.2                    | 0.0                         | 6.7                     | -4.3                      | 0.0                     | -4.3                  | 0.0                     |  |
|                 | <i>Meta-GGAs</i>               |                         |                           |                         |                             |                         |                           |                         |                       |                         |  |
| M06-L           | -2.8                           | 2.9                     | 1.4                       | 12.3                    | 0.4                         | -1.6                    | -2.6                      | 0.0                     | -4.1                  | 0.0                     |  |
| MVS             | -7.4                           | -6.6                    | -0.2                      | 4.4                     | -0.3                        | -2.0                    | -8.6                      | 0.0                     | -13.5                 | 0.0                     |  |
| TPSS            | -3.9                           | 8.2                     | -2.2                      | 9.9                     | -2.8                        | 0.1                     | -5.8                      | 0.0                     | -7.3                  | 0.0                     |  |
| revTPSS         | -4.9                           | 6.0                     | -3.2                      | 6.8                     | -3.4                        | -1.6                    | -5.3                      | 0.0                     | -5.4                  | 0.0                     |  |
|                 | <i>Hybrids</i>                 |                         |                           |                         |                             |                         |                           |                         |                       |                         |  |
| B3LYP           | 3.0                            | 10.5                    | 3.4                       | 10.3                    | 1.7                         | 3.8                     | -1.7                      | 0.0                     | -0.7                  | 0.0                     |  |
| B3LYP*          | 1.1                            | 9.9                     | 1.6                       | 10.0                    | 0.7                         | 3.5                     | -3.3                      | 0.0                     | -3.6                  | 0.0                     |  |
| B1LYP           | 4.4                            | 10.7                    | 4.6                       | 9.9                     | 2.6                         | 4.1                     | -0.4                      | 0.0                     | 1.6                   | 0.0                     |  |
| B1PW91          | 0.0                            | -0.5                    | 2.9                       | 2.5                     | -0.6                        | -2.2                    | -3.8                      | 0.0                     | -4.2                  | 0.0                     |  |
| BHandH          | -6.8                           | -18.8                   | -3.5                      | -19.0                   | 1.0                         | -4.6                    | -2.8                      | 0.0                     | -7.8                  | 0.0                     |  |
| BHandHLYP       | 7.0                            | 3.2                     | 8.1                       | 1.2                     | 5.4                         | 2.2                     | 4.2                       | 0.0                     | 8.1                   | 0.0                     |  |
| KMLYP           | -0.6                           | -12.8                   | 2.5                       | -13.1                   | 3.3                         | -3.1                    | 1.0                       | 0.0                     | -0.1                  | 0.0                     |  |
| O3LYP           | -21.2                          | -27.5                   | -16.8                     | -23.5                   | -5.8                        | -7.8                    | -13.9                     | 0.0                     | -28.4                 | 0.0                     |  |
| OPBE0           | 1.9                            | -6.0                    | 6.3                       | 0.0                     | -2.7                        | -7.8                    | -5.2                      | 0.0                     | -4.9                  | 0.0                     |  |
| PBE0            | -3.0                           | -4.6                    | 0.1                       | -1.4                    | -1.2                        | -3.0                    | -4.7                      | 0.0                     | -7.2                  | 0.0                     |  |
| mPW1PW          | -0.9                           | -0.9                    | 1.9                       | 1.7                     | -0.4                        | -1.7                    | -3.6                      | 0.0                     | -4.6                  | 0.0                     |  |
| mPW1K           | 1.1                            | -6.3                    | 4.5                       | -4.3                    | 1.5                         | -3.2                    | -0.4                      | 0.0                     | 0.0                   | 0.0                     |  |
| S12H            | -3.2                           | -4.9                    | 1.1                       | 0.5                     | -0.2                        | -3.2                    | -2.7                      | 0.0                     | -6.0                  | 0.0                     |  |
| X3LYP           | 2.3                            | 8.9                     | 2.7                       | 8.5                     | 1.8                         | 3.6                     | -1.7                      | 0.0                     | -1.1                  | 0.0                     |  |
|                 | <i>Meta-Hybrids</i>            |                         |                           |                         |                             |                         |                           |                         |                       |                         |  |
| M06             | -0.3                           | 0.3                     | 4.0                       | 6.6                     | 0.3                         | -1.1                    | -1.9                      | 0.0                     | -1.8                  | 0.0                     |  |
| M06-2X          | -2.0                           | -1.4                    | 2.7                       | -0.9                    | 1.2                         | -0.4                    | -0.6                      | 0.0                     | -1.5                  | 0.0                     |  |
| M06-HF          | -5.1                           | -1.3                    | 1.1                       | -12.1                   | -0.5                        | 0.8                     | 0.5                       | 0.0                     | 0.6                   | 0.0                     |  |
| TPSSH           | -2.6                           | 5.1                     | -0.6                      | 6.7                     | -1.8                        | -0.9                    | -4.3                      | 0.0                     | -5.0                  | 0.0                     |  |
|                 | <i>Double-Hybrids</i>          |                         |                           |                         |                             |                         |                           |                         |                       |                         |  |
| B2K-PLYP        | -1.5                           | -1.2                    | 0.2                       | 3.8                     | 1.4                         | 0.2                     | -1.2                      | 0.0                     | -1.2                  | 0.0                     |  |
| B2T-PLYP        | -0.5                           | 2.2                     | 0.7                       | 6.3                     | 1.3                         | 1.2                     | -1.5                      | 0.0                     | -1.2                  | 0.0                     |  |
| B2-PLYP         | -0.5                           | 4.2                     | 0.5                       | 8.2                     | 1.0                         | 1.9                     | -2.1                      | 0.0                     | -2.0                  | 0.0                     |  |
| LS1-TPSS        | -5.4                           | -8.4                    | -2.1                      | -0.3                    | -0.4                        | -3.5                    | -3.2                      | 0.0                     | -4.9                  | 0.0                     |  |
| mPW2K-PLYP      | -1.8                           | -1.3                    | -0.2                      | 3.6                     | 1.5                         | 0.4                     | -1.1                      | 0.0                     | -1.4                  | 0.0                     |  |
| mPW2-PLYP       | -0.2                           | 3.2                     | 0.8                       | 6.3                     | 1.8                         | 2.0                     | -1.0                      | 0.0                     | -0.8                  | 0.0                     |  |
| PBE0-DH         | -2.7                           | -8.8                    | 0.8                       | -4.4                    | -0.1                        | -4.1                    | -2.7                      | 0.0                     | -4.4                  | 0.0                     |  |
| revDSD-BLYP     | -2.6                           | -1.7                    | -0.7                      | 3.4                     | 1.6                         | 0.6                     | -0.3                      | 0.0                     | -1.1                  | 0.0                     |  |
| revDSD-PBE      | -3.3                           | -4.7                    | -0.8                      | 1.8                     | 0.4                         | -1.7                    | -1.1                      | 0.0                     | -3.1                  | 0.0                     |  |
| revDSD-PBEP86   | -1.1                           | -2.0                    | 0.9                       | 3.9                     | 1.2                         | -0.7                    | 0.0                       | 0.0                     | -0.9                  | 0.0                     |  |
|                 | <i>Range-Separated Hybrids</i> |                         |                           |                         |                             |                         |                           |                         |                       |                         |  |
| CAM-B3LYP       | 3.8                            | 2.5                     | 4.6                       | 1.3                     | 2.8                         | 1.2                     | 0.4                       | 0.0                     | 1.4                   | 0.0                     |  |
| CAMY-B3LYP      | 1.9                            | 3.5                     | 2.3                       | 2.7                     | 2.1                         | 1.9                     | -0.8                      | 0.0                     | -0.6                  | 0.0                     |  |
| $\omega$ B97    | 3.4                            | -7.9                    | 4.2                       | -5.8                    | 3.3                         | -4.5                    | 3.3                       | 0.0                     | 3.1                   | 0.0                     |  |
| $\omega$ B97X   | 2.9                            | -4.3                    | 3.8                       | -3.1                    | 2.8                         | -2.5                    | 1.9                       | 0.0                     | 1.6                   | 0.0                     |  |
| $\omega$ B97X-D | 3.4                            | 0.1                     | 4.6                       | 1.2                     | 1.6                         | -1.7                    | -0.4                      | 0.0                     | 0.1                   | 0.0                     |  |

**Table S29** (continued).

| XC           | Diels-Alder Reaction        |                         | 1,3-dipolar Cycloaddition |                         | Electrocyclic Rearrangement |                         | Sigmatropic Rearrangement |                         | Double Group Transfer |                         |
|--------------|-----------------------------|-------------------------|---------------------------|-------------------------|-----------------------------|-------------------------|---------------------------|-------------------------|-----------------------|-------------------------|
|              | $\Delta E^\ddagger$         | $\Delta E_{\text{rxn}}$ | $\Delta E^\ddagger$       | $\Delta E_{\text{rxn}}$ | $\Delta E^\ddagger$         | $\Delta E_{\text{rxn}}$ | $\Delta E^\ddagger$       | $\Delta E_{\text{rxn}}$ | $\Delta E^\ddagger$   | $\Delta E_{\text{rxn}}$ |
|              | <i>Dispersion-Corrected</i> |                         |                           |                         |                             |                         |                           |                         |                       |                         |
| BP86-D3(BJ)  | -10.6                       | 1.2                     | -7.0                      | 4.9                     | -3.7                        | 0.6                     | -9.1                      | 0.0                     | -15.5                 | 0.0                     |
| BLYP-D3(BJ)  | -6.3                        | 11.7                    | -4.4                      | 13.2                    | -0.8                        | 6.0                     | -5.8                      | 0.0                     | -9.4                  | 0.0                     |
| PBE-D3(BJ)   | -10.5                       | -1.1                    | -6.9                      | 3.4                     | -4.3                        | -0.9                    | -9.5                      | 0.0                     | -16.6                 | 0.0                     |
| OLYP-D3(BJ)  | -11.7                       | -1.7                    | -5.8                      | 4.0                     | -3.9                        | -0.6                    | -9.1                      | 0.0                     | -13.9                 | 0.0                     |
| OPBE-D3(BJ)  | -16.0                       | -13.5                   | -7.3                      | -3.7                    | -7.2                        | -7.4                    | -12.5                     | 0.0                     | -20.2                 | 0.0                     |
| B3LYP-D3(BJ) | -3.4                        | 5.3                     | -1.0                      | 6.1                     | 1.3                         | 3.9                     | -2.4                      | 0.0                     | -4.3                  | 0.0                     |
| PBE0-D3(BJ)  | -6.5                        | -7.3                    | -2.3                      | -3.7                    | -1.3                        | -2.9                    | -4.9                      | 0.0                     | -9.2                  | 0.0                     |
| M06-2X-D3    | -2.1                        | -1.5                    | 2.6                       | -1.0                    | 1.2                         | -0.4                    | -0.6                      | 0.0                     | -1.6                  | 0.0                     |

**Table S30.** Mean error (ME), mean absolute error (MAE), maximum unsigned error (MUE) and standard deviation (SD) of reaction barriers and energies (kcal mol<sup>-1</sup>) for the various pericyclic reactions, computed with XC/TZ2P//BP86/TZ2P compared to CCSDT(Q)/CBS//CCSD(T)/cc-pVTZ.

| XC              | $\Delta E^\ddagger$ |      |      |     | $\Delta E_{\text{rxn}}$ |                                |      |     | Total |      |      |     |
|-----------------|---------------------|------|------|-----|-------------------------|--------------------------------|------|-----|-------|------|------|-----|
|                 | ME                  | MAE  | MUE  | SD  | ME                      | MAE                            | MUE  | SD  | ME    | MAE  | MUE  | SD  |
| VWN             | -16.7               | 16.7 | 28.1 | 6.9 | -11.6                   | 11.6                           | 16.9 | 4.7 | -14.8 | 14.8 | 28.1 | 6.6 |
|                 |                     |      |      |     |                         | <i>LDA</i>                     |      |     |       |      |      |     |
|                 |                     |      |      |     |                         | <i>GGAs</i>                    |      |     |       |      |      |     |
| BP86            | -6.3                | 6.3  | 12.1 | 3.5 | 5.1                     | 5.1                            | 8.8  | 3.5 | -2.0  | 5.8  | 12.1 | 3.6 |
| BLYP            | -1.5                | 2.6  | 5.0  | 1.9 | 14.1                    | 14.1                           | 18.3 | 5.8 | 4.3   | 6.9  | 18.3 | 6.8 |
| BEE             | -5.9                | 5.9  | 11.7 | 4.1 | 4.6                     | 5.5                            | 9.8  | 3.4 | -2.0  | 5.8  | 11.7 | 3.9 |
| PW91            | -7.8                | 7.8  | 14.4 | 3.8 | 2.4                     | 2.7                            | 5.6  | 2.1 | -4.0  | 5.9  | 14.4 | 4.1 |
| PBE             | -7.7                | 7.7  | 14.3 | 3.8 | 2.3                     | 3.0                            | 6.0  | 2.1 | -3.9  | 5.9  | 14.3 | 4.0 |
| PBEsol          | -12.6               | 12.6 | 21.8 | 5.2 | -5.7                    | 5.7                            | 8.5  | 2.0 | -10.0 | 10.0 | 21.8 | 5.4 |
| RPBE            | -3.6                | 4.1  | 8.4  | 3.1 | 8.3                     | 8.3                            | 14.0 | 5.7 | 0.8   | 5.6  | 14.0 | 4.7 |
| revPBE          | -3.9                | 4.3  | 8.9  | 3.3 | 7.7                     | 7.7                            | 13.4 | 5.6 | 0.4   | 5.5  | 13.4 | 4.6 |
| mPBE            | -6.6                | 6.6  | 12.7 | 3.6 | 4.0                     | 4.3                            | 8.1  | 3.1 | -2.6  | 5.7  | 12.7 | 3.6 |
| mPW             | -5.6                | 5.6  | 11.2 | 3.4 | 5.6                     | 5.6                            | 9.9  | 3.9 | -1.4  | 5.6  | 11.2 | 3.6 |
| HTBS            | -7.8                | 7.8  | 14.7 | 4.4 | 1.3                     | 3.4                            | 5.8  | 1.9 | -4.4  | 6.1  | 14.7 | 4.2 |
| OLYP            | -0.5                | 4.7  | 5.9  | 1.3 | 9.5                     | 9.8                            | 16.3 | 6.8 | 3.3   | 6.6  | 16.3 | 4.9 |
| OPBE            | -4.5                | 6.2  | 11.1 | 3.9 | 0.3                     | 5.2                            | 7.9  | 3.4 | -2.7  | 5.8  | 11.1 | 3.8 |
| XLYP            | -1.1                | 2.3  | 4.3  | 1.7 | 15.0                    | 15.0                           | 19.3 | 5.9 | 4.9   | 7.1  | 19.3 | 7.3 |
|                 |                     |      |      |     |                         | <i>Meta-GGAs</i>               |      |     |       |      |      |     |
| M06-L           | -1.5                | 2.3  | 4.1  | 1.3 | 4.5                     | 5.6                            | 12.3 | 4.8 | 0.7   | 3.5  | 12.3 | 3.5 |
| MVS             | -6.0                | 6.0  | 13.5 | 5.1 | -1.4                    | 4.3                            | 6.6  | 1.9 | -4.3  | 5.4  | 13.5 | 4.3 |
| TPSS            | -4.4                | 4.4  | 7.3  | 1.9 | 6.0                     | 6.0                            | 9.9  | 4.3 | -0.5  | 5.0  | 9.9  | 3.1 |
| revTPSS         | -4.4                | 4.4  | 5.4  | 0.9 | 3.7                     | 4.8                            | 6.8  | 2.3 | -1.4  | 4.6  | 6.8  | 1.6 |
|                 |                     |      |      |     |                         | <i>Hybrids</i>                 |      |     |       |      |      |     |
| B3LYP           | 1.1                 | 2.1  | 3.4  | 1.0 | 8.2                     | 8.2                            | 10.5 | 3.1 | 3.8   | 4.4  | 10.5 | 3.6 |
| B3LYP*          | -0.7                | 2.1  | 3.6  | 1.2 | 7.8                     | 7.8                            | 10.0 | 3.0 | 2.5   | 4.2  | 10.0 | 3.5 |
| B1LYP           | 2.6                 | 2.7  | 4.6  | 1.6 | 8.2                     | 8.2                            | 10.7 | 2.9 | 4.7   | 4.8  | 10.7 | 3.5 |
| B1PW91          | -1.1                | 2.3  | 4.2  | 1.7 | 0.0                     | 1.7                            | 2.5  | 0.9 | -0.7  | 2.1  | 4.2  | 1.5 |
| BHandH          | -4.0                | 4.4  | 7.8  | 2.6 | -14.1                   | 14.1                           | 19.0 | 6.8 | -7.8  | 8.0  | 19.0 | 6.6 |
| BHandHLYP       | 6.6                 | 6.6  | 8.1  | 1.5 | 2.2                     | 2.2                            | 3.2  | 0.8 | 4.9   | 4.9  | 8.1  | 2.5 |
| KMLYP           | 1.2                 | 1.5  | 3.3  | 1.2 | -9.6                    | 9.6                            | 13.1 | 4.7 | -2.9  | 4.6  | 13.1 | 5.0 |
| O3LYP           | -17.2               | 17.2 | 28.4 | 7.5 | -19.6                   | 19.6                           | 27.5 | 8.5 | -18.1 | 18.1 | 28.4 | 8.0 |
| OPBE0           | -0.9                | 4.2  | 6.3  | 1.6 | -4.6                    | 4.6                            | 7.8  | 3.3 | -2.3  | 4.4  | 7.8  | 2.4 |
| PBE0            | -3.2                | 3.2  | 7.2  | 2.5 | -3.0                    | 3.0                            | 4.6  | 1.3 | -3.1  | 3.1  | 7.2  | 2.1 |
| mPW1PW          | -1.5                | 2.3  | 4.6  | 1.6 | -0.3                    | 1.4                            | 1.7  | 0.4 | -1.1  | 1.9  | 4.6  | 1.4 |
| mPW1K           | 1.3                 | 1.5  | 4.5  | 1.6 | -4.6                    | 4.6                            | 6.3  | 1.3 | -0.9  | 2.7  | 6.3  | 2.1 |
| S12H            | -2.2                | 2.6  | 6.0  | 2.0 | -2.5                    | 2.8                            | 4.9  | 1.8 | -2.3  | 2.7  | 6.0  | 1.9 |
| X3LYP           | 0.8                 | 1.9  | 2.7  | 0.5 | 7.0                     | 7.0                            | 8.9  | 2.4 | 3.1   | 3.8  | 8.9  | 2.9 |
|                 |                     |      |      |     |                         | <i>Meta-Hybrids</i>            |      |     |       |      |      |     |
| M06             | 0.1                 | 1.7  | 4.0  | 1.4 | 1.9                     | 2.6                            | 6.6  | 2.8 | 0.8   | 2.0  | 6.6  | 2.1 |
| M06-2X          | 0.0                 | 1.6  | 2.7  | 0.7 | -0.9                    | 0.9                            | 1.4  | 0.4 | -0.4  | 1.3  | 2.7  | 0.7 |
| M06-HF          | -0.7                | 1.6  | 5.1  | 1.8 | -4.2                    | 4.7                            | 12.1 | 5.3 | -2.0  | 2.7  | 12.1 | 3.8 |
| TPSSH           | -2.9                | 2.9  | 5.0  | 1.6 | 3.6                     | 4.2                            | 6.7  | 2.4 | -0.4  | 3.4  | 6.7  | 2.1 |
|                 |                     |      |      |     |                         | <i>Double-Hybrids</i>          |      |     |       |      |      |     |
| B2K-PLYP        | -0.5                | 1.1  | 1.5  | 0.5 | 0.9                     | 1.7                            | 3.8  | 1.5 | 0.1   | 1.3  | 3.8  | 1.0 |
| B2T-PLYP        | -0.2                | 1.0  | 1.5  | 0.4 | 3.2                     | 3.2                            | 6.3  | 2.2 | 1.0   | 1.8  | 6.3  | 1.7 |
| B2-PLYP         | -0.6                | 1.2  | 2.1  | 0.7 | 4.7                     | 4.7                            | 8.2  | 2.6 | 1.4   | 2.5  | 8.2  | 2.4 |
| LS1-TPSS        | -3.2                | 3.2  | 5.4  | 1.8 | -4.0                    | 4.0                            | 8.4  | 3.3 | -3.5  | 3.5  | 8.4  | 2.5 |
| mPW2K-PLYP      | -0.6                | 1.2  | 1.8  | 0.5 | 0.9                     | 1.7                            | 3.6  | 1.4 | 0.0   | 1.4  | 3.6  | 1.0 |
| mPW2-PLYP       | 0.1                 | 0.9  | 1.8  | 0.5 | 3.8                     | 3.8                            | 6.3  | 1.8 | 1.5   | 2.0  | 6.3  | 1.8 |
| PBE0-DH         | -1.8                | 2.1  | 4.4  | 1.5 | -5.7                    | 5.7                            | 8.8  | 2.1 | -3.3  | 3.5  | 8.8  | 2.5 |
| revDSD-BLYP     | -0.6                | 1.2  | 2.6  | 0.8 | 0.8                     | 1.9                            | 3.4  | 1.2 | -0.1  | 1.5  | 3.4  | 1.0 |
| revDSD-PBE      | -1.6                | 1.7  | 3.3  | 1.2 | -1.5                    | 2.7                            | 4.7  | 1.4 | -1.6  | 2.1  | 4.7  | 1.4 |
| revDSD-PBEP86   | 0.0                 | 0.8  | 1.2  | 0.4 | 0.4                     | 2.2                            | 3.9  | 1.3 | 0.2   | 1.3  | 3.9  | 1.1 |
|                 |                     |      |      |     |                         | <i>Range-Separated Hybrids</i> |      |     |       |      |      |     |
| CAM-B3LYP       | 2.6                 | 2.6  | 4.6  | 1.5 | 1.6                     | 1.6                            | 2.5  | 0.6 | 2.2   | 2.2  | 4.6  | 1.4 |
| CAMY-B3LYP      | 1.0                 | 1.5  | 2.3  | 0.7 | 2.7                     | 2.7                            | 3.5  | 0.7 | 1.6   | 2.0  | 3.5  | 0.9 |
| $\omega$ B97    | 3.5                 | 3.5  | 4.2  | 0.4 | -6.0                    | 6.0                            | 7.9  | 1.4 | -0.1  | 4.4  | 7.9  | 1.5 |
| $\omega$ B97X   | 2.6                 | 2.6  | 3.8  | 0.8 | -3.3                    | 3.3                            | 4.3  | 0.7 | 0.4   | 2.9  | 4.3  | 0.8 |
| $\omega$ B97X-D | 1.9                 | 2.0  | 4.6  | 1.8 | -0.1                    | 1.0                            | 1.7  | 0.6 | 1.1   | 1.6  | 4.6  | 1.5 |



**Table S30** (continued).

| XC           | $\Delta E^\ddagger$         |      |      |     | $\Delta E_{\text{rxn}}$ |      |      |     | Total |      |      |     |
|--------------|-----------------------------|------|------|-----|-------------------------|------|------|-----|-------|------|------|-----|
|              | ME                          | MAE  | MUE  | SD  | ME                      | MAE  | MUE  | SD  | ME    | MAE  | MUE  | SD  |
|              | <i>Dispersion-Corrected</i> |      |      |     |                         |      |      |     |       |      |      |     |
| BP86-D3(BJ)  | -9.2                        | 9.2  | 15.5 | 3.9 | 2.2                     | 2.2  | 4.9  | 1.9 | -4.9  | 6.6  | 15.5 | 4.7 |
| BLYP-D3(BJ)  | -5.3                        | 5.3  | 9.4  | 2.8 | 10.3                    | 10.3 | 13.2 | 3.1 | 0.5   | 7.2  | 13.2 | 3.8 |
| PBE-D3(BJ)   | -9.6                        | 9.6  | 16.6 | 4.1 | 0.5                     | 1.8  | 3.4  | 1.1 | -5.8  | 6.6  | 16.6 | 5.0 |
| OLYP-D3(BJ)  | -8.9                        | 8.9  | 13.9 | 3.7 | 0.6                     | 2.1  | 4.0  | 1.4 | -5.3  | 6.3  | 13.9 | 4.5 |
| OPBE-D3(BJ)  | -12.6                       | 12.6 | 20.2 | 5.0 | -8.2                    | 8.2  | 13.5 | 4.0 | -11.0 | 11.0 | 20.2 | 5.1 |
| B3LYP-D3(BJ) | -2.0                        | 2.5  | 4.3  | 1.3 | 5.1                     | 5.1  | 6.1  | 0.9 | 0.7   | 3.4  | 6.1  | 1.7 |
| PBE0-D3(BJ)  | -4.8                        | 4.8  | 9.2  | 2.9 | -4.6                    | 4.6  | 7.3  | 1.9 | -4.8  | 4.8  | 9.2  | 2.5 |
| M06-2X-D3    | -0.1                        | 1.6  | 2.6  | 0.7 | -0.9                    | 0.9  | 1.5  | 0.5 | -0.4  | 1.4  | 2.6  | 0.7 |

**Table S31.** Reaction barriers and reaction energies (kcal mol<sup>-1</sup>) for the various pericyclic reactions, computed with XC/QZ4P//BP86/TZ2P.

| XC              | Diels-Alder Reaction           |                         | 1,3-dipolar Cycloaddition |                         | Electrocyclic Rearrangement |                         | Sigmatropic Rearrangement |                         | Double Group Transfer |                         |
|-----------------|--------------------------------|-------------------------|---------------------------|-------------------------|-----------------------------|-------------------------|---------------------------|-------------------------|-----------------------|-------------------------|
|                 | $\Delta E^\ddagger$            | $\Delta E_{\text{rxn}}$ | $\Delta E^\ddagger$       | $\Delta E_{\text{rxn}}$ | $\Delta E^\ddagger$         | $\Delta E_{\text{rxn}}$ | $\Delta E^\ddagger$       | $\Delta E_{\text{rxn}}$ | $\Delta E^\ddagger$   | $\Delta E_{\text{rxn}}$ |
|                 | <i>LDA</i>                     |                         |                           |                         |                             |                         |                           |                         |                       |                         |
| VWN             | 0.8                            | -65.0                   | 3.2                       | -42.2                   | 36.3                        | 2.4                     | 21.9                      | 0.0                     | 22.1                  | 0.0                     |
|                 | <i>GGAs</i>                    |                         |                           |                         |                             |                         |                           |                         |                       |                         |
| BP86            | 15.0                           | -42.3                   | 15.4                      | -20.8                   | 39.6                        | 8.2                     | 28.2                      | 0.0                     | 38.1                  | 0.0                     |
| BLYP            | 21.0                           | -30.2                   | 19.3                      | -11.1                   | 42.7                        | 13.8                    | 31.9                      | 0.0                     | 45.2                  | 0.0                     |
| BEE             | 16.1                           | -43.1                   | 17.2                      | -20.0                   | 38.9                        | 6.3                     | 28.0                      | 0.0                     | 38.4                  | 0.0                     |
| PW91            | 12.4                           | -46.2                   | 13.3                      | -24.1                   | 39.3                        | 7.4                     | 27.8                      | 0.0                     | 35.8                  | 0.0                     |
| PBE             | 12.8                           | -46.3                   | 13.9                      | -23.7                   | 38.9                        | 6.7                     | 27.6                      | 0.0                     | 35.8                  | 0.0                     |
| PBEsol          | 6.7                            | -56.8                   | 8.8                       | -33.7                   | 36.6                        | 3.2                     | 24.0                      | 0.0                     | 28.4                  | 0.0                     |
| RPBE            | 18.8                           | -38.1                   | 19.2                      | -15.8                   | 40.0                        | 8.2                     | 29.8                      | 0.0                     | 41.7                  | 0.0                     |
| revPBE          | 18.5                           | -39.0                   | 19.0                      | -16.4                   | 39.7                        | 7.8                     | 29.4                      | 0.0                     | 41.2                  | 0.0                     |
| mPBE            | 14.4                           | -44.1                   | 15.3                      | -21.6                   | 39.2                        | 7.2                     | 28.2                      | 0.0                     | 37.4                  | 0.0                     |
| mPW             | 15.5                           | -41.9                   | 16.1                      | -19.8                   | 39.9                        | 8.3                     | 28.8                      | 0.0                     | 38.9                  | 0.0                     |
| HTBS            | 13.9                           | -47.1                   | 15.5                      | -24.1                   | 37.4                        | 4.7                     | 26.1                      | 0.0                     | 35.5                  | 0.0                     |
| OLYP            | 24.0                           | -36.0                   | 23.9                      | -13.6                   | 40.4                        | 7.1                     | 30.8                      | 0.0                     | 45.4                  | 0.0                     |
| OPBE            | 19.4                           | -48.5                   | 21.9                      | -22.5                   | 36.7                        | 0.1                     | 26.9                      | 0.0                     | 39.0                  | 0.0                     |
| XLYP            | 21.3                           | -28.9                   | 19.3                      | -10.1                   | 43.2                        | 14.7                    | 32.5                      | 0.0                     | 45.9                  | 0.0                     |
|                 | <i>Meta-GGAs</i>               |                         |                           |                         |                             |                         |                           |                         |                       |                         |
| M06-L           | 16.9                           | -45.9                   | 19.8                      | -17.2                   | 43.6                        | 5.9                     | 34.1                      | 0.0                     | 46.0                  | 0.0                     |
| MVS             | 12.8                           | -54.2                   | 18.6                      | -24.6                   | 42.7                        | 5.9                     | 28.2                      | 0.0                     | 36.7                  | 0.0                     |
| TPSS            | 15.5                           | -40.3                   | 15.9                      | -19.8                   | 40.2                        | 7.7                     | 30.9                      | 0.0                     | 42.9                  | 0.0                     |
| revTPSS         | 14.6                           | -42.3                   | 15.0                      | -22.9                   | 39.6                        | 6.2                     | 31.5                      | 0.0                     | 44.8                  | 0.0                     |
|                 | <i>Hybrids</i>                 |                         |                           |                         |                             |                         |                           |                         |                       |                         |
| B3LYP           | 22.6                           | -37.5                   | 21.7                      | -18.9                   | 44.8                        | 11.8                    | 35.1                      | 0.0                     | 49.6                  | 0.0                     |
| B3LYP*          | 20.6                           | -38.3                   | 19.9                      | -19.3                   | 43.8                        | 11.5                    | 33.5                      | 0.0                     | 46.7                  | 0.0                     |
| B1LYP           | 24.0                           | -37.3                   | 23.0                      | -19.2                   | 45.7                        | 12.1                    | 36.4                      | 0.0                     | 51.9                  | 0.0                     |
| B1PW91          | 19.6                           | -48.5                   | 21.2                      | -26.9                   | 42.4                        | 5.7                     | 33.0                      | 0.0                     | 46.2                  | 0.0                     |
| BHandH          | 12.9                           | -66.3                   | 14.9                      | -48.1                   | 44.1                        | 3.5                     | 34.1                      | 0.0                     | 42.6                  | 0.0                     |
| BHandHLYP       | 26.9                           | -44.5                   | 26.5                      | -27.9                   | 48.6                        | 10.3                    | 41.2                      | 0.0                     | 58.5                  | 0.0                     |
| KMLYP           | 19.3                           | -60.2                   | 21.0                      | -42.2                   | 46.4                        | 5.1                     | 37.9                      | 0.0                     | 50.3                  | 0.0                     |
| O3LYP           | -1.8                           | -75.5                   | 1.4                       | -53.1                   | 37.3                        | 0.2                     | 23.0                      | 0.0                     | 21.9                  | 0.0                     |
| OPBE0           | 21.4                           | -54.3                   | 24.4                      | -30.0                   | 40.0                        | -0.3                    | 31.6                      | 0.0                     | 45.3                  | 0.0                     |
| PBE0            | 16.5                           | -52.6                   | 18.4                      | -30.9                   | 41.8                        | 4.9                     | 32.2                      | 0.0                     | 43.1                  | 0.0                     |
| mPW1PW          | 18.7                           | -48.9                   | 20.2                      | -27.7                   | 42.6                        | 6.2                     | 33.2                      | 0.0                     | 45.7                  | 0.0                     |
| mPW1K           | 20.9                           | -54.0                   | 22.9                      | -33.6                   | 44.6                        | 4.7                     | 36.5                      | 0.0                     | 50.4                  | 0.0                     |
| S12H            | 16.4                           | -53.1                   | 19.4                      | -29.2                   | 42.7                        | 4.5                     | 34.1                      | 0.0                     | 44.2                  | 0.0                     |
| X3LYP           | 21.9                           | -39.1                   | 21.1                      | -20.7                   | 44.9                        | 11.6                    | 35.2                      | 0.0                     | 49.2                  | 0.0                     |
|                 | <i>Meta-Hybrids</i>            |                         |                           |                         |                             |                         |                           |                         |                       |                         |
| M06             | 19.4                           | -47.6                   | 22.4                      | -22.7                   | 43.4                        | 7.0                     | 34.9                      | 0.0                     | 48.4                  | 0.0                     |
| M06-2X          | 17.8                           | -48.7                   | 21.2                      | -29.7                   | 44.4                        | 7.8                     | 36.4                      | 0.0                     | 49.0                  | 0.0                     |
| M06-HF          | 13.9                           | -48.4                   | 18.7                      | -40.6                   | 42.5                        | 9.7                     | 37.3                      | 0.0                     | 50.7                  | 0.0                     |
| TPSSH           | 16.9                           | -43.2                   | 17.6                      | -22.9                   | 41.2                        | 6.9                     | 32.5                      | 0.0                     | 45.2                  | 0.0                     |
|                 | <i>Double-Hybrids</i>          |                         |                           |                         |                             |                         |                           |                         |                       |                         |
| B2K-PLYP        | 18.2                           | -48.5                   | 17.7                      | -25.2                   | 44.3                        | 7.7                     | 35.4                      | 0.0                     | 49.2                  | 0.0                     |
| B2T-PLYP        | 19.2                           | -45.3                   | 19.2                      | -22.8                   | 44.3                        | 9.0                     | 35.1                      | 0.0                     | 49.3                  | 0.0                     |
| B2-PLYP         | 19.1                           | -43.4                   | 18.2                      | -20.9                   | 43.9                        | 9.6                     | 34.5                      | 0.0                     | 48.5                  | 0.0                     |
| LS1-TPSS        | 14.2                           | -55.7                   | 15.1                      | -29.5                   | 42.3                        | 3.9                     | 33.3                      | 0.0                     | 45.5                  | 0.0                     |
| mPW2K-PLYP      | 17.9                           | -48.7                   | 17.3                      | -25.5                   | 44.4                        | 7.9                     | 35.4                      | 0.0                     | 49.0                  | 0.0                     |
| mPW2-PLYP       | 19.5                           | -44.4                   | 18.6                      | -22.8                   | 44.8                        | 9.8                     | 35.6                      | 0.0                     | 49.6                  | 0.0                     |
| PBE0-DH         | 17.1                           | -56.3                   | 18.9                      | -33.7                   | 42.8                        | 3.8                     | 34.0                      | 0.0                     | 46.1                  | 0.0                     |
| revDSD-BLYP     | 17.5                           | -48.5                   | 17.0                      | -25.2                   | 44.6                        | 8.4                     | 36.3                      | 0.0                     | 46.9                  | 0.0                     |
| revDSD-PBE      | 16.9                           | -51.4                   | 17.0                      | -26.9                   | 43.4                        | 6.3                     | 35.5                      | 0.0                     | 47.8                  | 0.0                     |
| revDSD-PBEP86   | 19.0                           | -48.7                   | 18.7                      | -24.7                   | 44.2                        | 7.1                     | 36.6                      | 0.0                     | 50.0                  | 0.0                     |
|                 | <i>Range-Separated Hybrids</i> |                         |                           |                         |                             |                         |                           |                         |                       |                         |
| CAM-B3LYP       | 23.5                           | -45.3                   | 22.1                      | -27.8                   | 45.9                        | 9.2                     | 37.2                      | 0.0                     | 51.7                  | 0.0                     |
| CAMY-B3LYP      | 21.6                           | -44.4                   | 20.6                      | -26.5                   | 45.3                        | 9.9                     | 36.1                      | 0.0                     | 49.8                  | 0.0                     |
| $\omega$ B97    | 23.2                           | -56.1                   | 22.7                      | -35.3                   | 46.3                        | 3.1                     | 40.1                      | 0.0                     | 53.2                  | 0.0                     |
| $\omega$ B97X   | 22.7                           | -52.2                   | 22.3                      | -32.4                   | 45.8                        | 5.4                     | 38.7                      | 0.0                     | 51.8                  | 0.0                     |
| $\omega$ B97X-D | 23.0                           | -47.6                   | 23.0                      | -28.0                   | 44.6                        | 6.3                     | 36.4                      | 0.0                     | 50.3                  | 0.0                     |

**Table S31** (continued).

| XC           | Diels-Alder Reaction        |                         | 1,3-dipolar Cycloaddition |                         | Electrocyclic Rearrangement |                         | Sigmatropic Rearrangement |                         | Double Group Transfer |                         |
|--------------|-----------------------------|-------------------------|---------------------------|-------------------------|-----------------------------|-------------------------|---------------------------|-------------------------|-----------------------|-------------------------|
|              | $\Delta E^\ddagger$         | $\Delta E_{\text{rxn}}$ | $\Delta E^\ddagger$       | $\Delta E_{\text{rxn}}$ | $\Delta E^\ddagger$         | $\Delta E_{\text{rxn}}$ | $\Delta E^\ddagger$       | $\Delta E_{\text{rxn}}$ | $\Delta E^\ddagger$   | $\Delta E_{\text{rxn}}$ |
|              | <i>Dispersion-Corrected</i> |                         |                           |                         |                             |                         |                           |                         |                       |                         |
| BP86-D3(BJ)  | 8.8                         | -47.2                   | 11.2                      | -24.7                   | 39.4                        | 8.4                     | 27.7                      | 0.0                     | 34.7                  | 0.0                     |
| BLYP-D3(BJ)  | 13.1                        | -36.6                   | 13.8                      | -16.2                   | 42.3                        | 13.9                    | 31.0                      | 0.0                     | 40.8                  | 0.0                     |
| PBE-D3(BJ)   | 8.9                         | -49.4                   | 11.2                      | -26.3                   | 38.8                        | 6.8                     | 27.2                      | 0.0                     | 33.5                  | 0.0                     |
| OLYP-D3(BJ)  | 7.7                         | -50.2                   | 12.2                      | -25.9                   | 39.0                        | 6.9                     | 27.5                      | 0.0                     | 36.1                  | 0.0                     |
| OPBE-D3(BJ)  | 3.2                         | -62.2                   | 10.5                      | -34.1                   | 35.5                        | -0.1                    | 24.1                      | 0.0                     | 29.9                  | 0.0                     |
| B3LYP-D3(BJ) | 16.1                        | -42.7                   | 17.3                      | -23.1                   | 44.5                        | 11.9                    | 34.4                      | 0.0                     | 46.0                  | 0.0                     |
| PBE0-D3(BJ)  | 13.0                        | -55.3                   | 16.0                      | -33.2                   | 41.7                        | 4.9                     | 31.9                      | 0.0                     | 41.1                  | 0.0                     |
| M06-2X-D3    | 17.7                        | -48.8                   | 21.1                      | -29.8                   | 44.4                        | 7.8                     | 36.4                      | 0.0                     | 48.9                  | 0.0                     |

**Table S32.** Errors in reaction barriers and reaction energies (kcal mol<sup>-1</sup>) for the various pericyclic reactions, computed with XC/QZ4P//BP86/TZ2P, compared to CCSDT(Q)/CBS//CCSD(T)/cc-pVTZ.

| XC              | Diels-Alder Reaction           |                         | 1,3-dipolar Cycloaddition |                         | Electrocyclic Rearrangement |                         | Sigmatropic Rearrangement |                         | Double Group Transfer |                         |  |
|-----------------|--------------------------------|-------------------------|---------------------------|-------------------------|-----------------------------|-------------------------|---------------------------|-------------------------|-----------------------|-------------------------|--|
|                 | $\Delta E^\ddagger$            | $\Delta E_{\text{rxn}}$ | $\Delta E^\ddagger$       | $\Delta E_{\text{rxn}}$ | $\Delta E^\ddagger$         | $\Delta E_{\text{rxn}}$ | $\Delta E^\ddagger$       | $\Delta E_{\text{rxn}}$ | $\Delta E^\ddagger$   | $\Delta E_{\text{rxn}}$ |  |
|                 | <i>LDA</i>                     |                         |                           |                         |                             |                         |                           |                         |                       |                         |  |
| VWN             | -18.8                          | -17.4                   | -15.1                     | -13.3                   | -7.1                        | -6.1                    | -14.9                     | 0.0                     | -28.1                 | 0.0                     |  |
|                 | <i>GGAs</i>                    |                         |                           |                         |                             |                         |                           |                         |                       |                         |  |
| BP86            | -4.6                           | 5.4                     | -2.9                      | 8.1                     | -3.8                        | -0.3                    | -8.6                      | 0.0                     | -12.1                 | 0.0                     |  |
| BLYP            | 1.4                            | 17.5                    | 1.0                       | 17.8                    | -0.7                        | 5.4                     | -4.9                      | 0.0                     | -5.0                  | 0.0                     |  |
| BEE             | -3.5                           | 4.6                     | -1.1                      | 8.9                     | -4.5                        | -2.2                    | -8.8                      | 0.0                     | -11.8                 | 0.0                     |  |
| PW91            | -7.2                           | 1.5                     | -5.0                      | 4.8                     | -4.1                        | -1.1                    | -9.0                      | 0.0                     | -14.4                 | 0.0                     |  |
| PBE             | -6.8                           | 1.4                     | -4.4                      | 5.2                     | -4.5                        | -1.8                    | -9.2                      | 0.0                     | -14.4                 | 0.0                     |  |
| PBEsol          | -12.9                          | -9.2                    | -9.5                      | -4.8                    | -6.8                        | -5.3                    | -12.8                     | 0.0                     | -21.8                 | 0.0                     |  |
| RPBE            | -0.8                           | 9.6                     | 0.9                       | 13.1                    | -3.4                        | -0.3                    | -7.0                      | 0.0                     | -8.5                  | 0.0                     |  |
| revPBE          | -1.1                           | 8.7                     | 0.7                       | 12.5                    | -3.7                        | -0.6                    | -7.4                      | 0.0                     | -9.0                  | 0.0                     |  |
| mPBE            | -5.2                           | 3.6                     | -3.0                      | 7.3                     | -4.2                        | -1.3                    | -8.6                      | 0.0                     | -12.8                 | 0.0                     |  |
| mPW             | -4.1                           | 5.8                     | -2.2                      | 9.1                     | -3.5                        | -0.1                    | -8.0                      | 0.0                     | -11.3                 | 0.0                     |  |
| HTBS            | -5.7                           | 0.5                     | -2.8                      | 4.8                     | -6.0                        | -3.8                    | -10.7                     | 0.0                     | -14.7                 | 0.0                     |  |
| OLYP            | 4.4                            | 11.7                    | 5.6                       | 15.3                    | -3.0                        | -1.4                    | -6.0                      | 0.0                     | -4.8                  | 0.0                     |  |
| OPBE            | -0.2                           | -0.9                    | 3.6                       | 6.4                     | -6.7                        | -8.4                    | -9.9                      | 0.0                     | -11.2                 | 0.0                     |  |
| XLYP            | 1.7                            | 18.8                    | 1.0                       | 18.8                    | -0.2                        | 6.3                     | -4.3                      | 0.0                     | -4.3                  | 0.0                     |  |
|                 | <i>Meta-GGAs</i>               |                         |                           |                         |                             |                         |                           |                         |                       |                         |  |
| M06-L           | -2.7                           | 1.8                     | 1.5                       | 11.7                    | 0.2                         | -2.6                    | -2.7                      | 0.0                     | -4.2                  | 0.0                     |  |
| MVS             | -6.8                           | -6.6                    | 0.3                       | 4.3                     | -0.7                        | -2.6                    | -8.6                      | 0.0                     | -13.5                 | 0.0                     |  |
| TPSS            | -4.1                           | 7.4                     | -2.4                      | 9.1                     | -3.2                        | -0.7                    | -5.9                      | 0.0                     | -7.3                  | 0.0                     |  |
| revTPSS         | -5.0                           | 5.4                     | -3.3                      | 6.0                     | -3.8                        | -2.3                    | -5.3                      | 0.0                     | -5.4                  | 0.0                     |  |
|                 | <i>Hybrids</i>                 |                         |                           |                         |                             |                         |                           |                         |                       |                         |  |
| B3LYP           | 3.0                            | 10.2                    | 3.4                       | 10.0                    | 1.4                         | 3.4                     | -1.7                      | 0.0                     | -0.6                  | 0.0                     |  |
| B3LYP*          | 1.0                            | 9.4                     | 1.6                       | 9.6                     | 0.4                         | 3.1                     | -3.3                      | 0.0                     | -3.5                  | 0.0                     |  |
| B1LYP           | 4.4                            | 10.4                    | 4.7                       | 9.7                     | 2.3                         | 3.7                     | -0.4                      | 0.0                     | 1.7                   | 0.0                     |  |
| B1PW91          | 0.0                            | -0.9                    | 2.9                       | 2.0                     | -1.0                        | -2.8                    | -3.8                      | 0.0                     | -4.0                  | 0.0                     |  |
| BHandH          | -6.7                           | -18.7                   | -3.4                      | -19.2                   | 0.7                         | -5.0                    | -2.7                      | 0.0                     | -7.6                  | 0.0                     |  |
| BHandHLYP       | 7.3                            | 3.2                     | 8.2                       | 1.0                     | 5.2                         | 1.9                     | 4.4                       | 0.0                     | 8.3                   | 0.0                     |  |
| KMLYP           | -0.3                           | -12.6                   | 2.7                       | -13.3                   | 3.0                         | -3.4                    | 1.1                       | 0.0                     | 0.1                   | 0.0                     |  |
| O3LYP           | -21.4                          | -27.9                   | -16.9                     | -24.2                   | -6.1                        | -8.3                    | -13.8                     | 0.0                     | -28.3                 | 0.0                     |  |
| OPBE0           | 1.8                            | -6.7                    | 6.1                       | -1.1                    | -3.4                        | -8.8                    | -5.2                      | 0.0                     | -4.9                  | 0.0                     |  |
| PBE0            | -3.1                           | -5.0                    | 0.1                       | -2.0                    | -1.6                        | -3.6                    | -4.6                      | 0.0                     | -7.1                  | 0.0                     |  |
| mPW1PW          | -0.9                           | -1.3                    | 1.9                       | 1.2                     | -0.8                        | -2.3                    | -3.6                      | 0.0                     | -4.5                  | 0.0                     |  |
| mPW1K           | 1.3                            | -6.4                    | 4.6                       | -4.7                    | 1.2                         | -3.8                    | -0.3                      | 0.0                     | 0.2                   | 0.0                     |  |
| S12H            | -3.2                           | -5.5                    | 1.1                       | -0.3                    | -0.7                        | -4.0                    | -2.7                      | 0.0                     | -6.0                  | 0.0                     |  |
| X3LYP           | 2.3                            | 8.6                     | 2.8                       | 8.2                     | 1.5                         | 3.2                     | -1.6                      | 0.0                     | -1.0                  | 0.0                     |  |
|                 | <i>Meta-Hybrids</i>            |                         |                           |                         |                             |                         |                           |                         |                       |                         |  |
| M06             | -0.2                           | 0.0                     | 4.1                       | 6.2                     | 0.0                         | -1.5                    | -1.9                      | 0.0                     | -1.8                  | 0.0                     |  |
| M06-2X          | -1.8                           | -1.1                    | 2.9                       | -0.8                    | 1.0                         | -0.6                    | -0.4                      | 0.0                     | -1.2                  | 0.0                     |  |
| M06-HF          | -5.7                           | -0.8                    | 0.4                       | -11.7                   | -0.9                        | 1.3                     | 0.5                       | 0.0                     | 0.5                   | 0.0                     |  |
| TPSSH           | -2.7                           | 4.5                     | -0.7                      | 6.0                     | -2.2                        | -1.6                    | -4.3                      | 0.0                     | -5.0                  | 0.0                     |  |
|                 | <i>Double-Hybrids</i>          |                         |                           |                         |                             |                         |                           |                         |                       |                         |  |
| B2K-PLYP        | -1.4                           | -0.9                    | -0.6                      | 3.7                     | 0.9                         | -0.7                    | -1.4                      | 0.0                     | -1.0                  | 0.0                     |  |
| B2T-PLYP        | -0.4                           | 2.4                     | 0.9                       | 6.1                     | 0.9                         | 0.6                     | -1.7                      | 0.0                     | -0.9                  | 0.0                     |  |
| B2-PLYP         | -0.5                           | 4.3                     | -0.1                      | 8.0                     | 0.5                         | 1.2                     | -2.3                      | 0.0                     | -1.7                  | 0.0                     |  |
| LS1-TPSS        | -5.4                           | -8.1                    | -3.2                      | -0.6                    | -1.1                        | -4.6                    | -3.5                      | 0.0                     | -4.7                  | 0.0                     |  |
| mPW2K-PLYP      | -1.7                           | -1.1                    | -1.0                      | 3.4                     | 1.0                         | -0.5                    | -1.4                      | 0.0                     | -1.2                  | 0.0                     |  |
| mPW2-PLYP       | -0.1                           | 3.3                     | 0.3                       | 6.1                     | 1.4                         | 1.4                     | -1.2                      | 0.0                     | -0.6                  | 0.0                     |  |
| PBE0-DH         | -2.5                           | -8.7                    | 0.6                       | -4.8                    | -0.6                        | -4.7                    | -2.8                      | 0.0                     | -4.1                  | 0.0                     |  |
| revDSD-BLYP     | -2.1                           | -0.9                    | -1.3                      | 3.7                     | 1.2                         | 0.0                     | -0.5                      | 0.0                     | -3.3                  | 0.0                     |  |
| revDSD-PBE      | -2.7                           | -3.8                    | -1.3                      | 2.0                     | 0.0                         | -2.2                    | -1.3                      | 0.0                     | -2.4                  | 0.0                     |  |
| revDSD-PBEP86   | -0.6                           | -1.1                    | 0.4                       | 4.2                     | 0.8                         | -1.4                    | -0.2                      | 0.0                     | -0.2                  | 0.0                     |  |
|                 | <i>Range-Separated Hybrids</i> |                         |                           |                         |                             |                         |                           |                         |                       |                         |  |
| CAM-B3LYP       | 3.9                            | 2.4                     | 3.8                       | 1.1                     | 2.5                         | 0.8                     | 0.4                       | 0.0                     | 1.5                   | 0.0                     |  |
| CAMY-B3LYP      | 2.0                            | 3.3                     | 2.3                       | 2.4                     | 1.9                         | 1.5                     | -0.7                      | 0.0                     | -0.4                  | 0.0                     |  |
| $\omega$ B97    | 3.6                            | -8.5                    | 4.4                       | -6.4                    | 2.9                         | -5.4                    | 3.3                       | 0.0                     | 3.0                   | 0.0                     |  |
| $\omega$ B97X   | 3.1                            | -4.6                    | 4.0                       | -3.5                    | 2.4                         | -3.1                    | 1.9                       | 0.0                     | 1.6                   | 0.0                     |  |
| $\omega$ B97X-D | 3.4                            | 0.0                     | 4.7                       | 0.9                     | 1.2                         | -2.2                    | -0.4                      | 0.0                     | 0.1                   | 0.0                     |  |

**Table S32 (continued).**

| XC           | Diels-Alder Reaction        |                         | 1,3-dipolar Cycloaddition |                         | Electrocyclic Rearrangement |                         | Sigmatropic Rearrangement |                         | Double Group Transfer |                         |
|--------------|-----------------------------|-------------------------|---------------------------|-------------------------|-----------------------------|-------------------------|---------------------------|-------------------------|-----------------------|-------------------------|
|              | $\Delta E^\ddagger$         | $\Delta E_{\text{rxn}}$ | $\Delta E^\ddagger$       | $\Delta E_{\text{rxn}}$ | $\Delta E^\ddagger$         | $\Delta E_{\text{rxn}}$ | $\Delta E^\ddagger$       | $\Delta E_{\text{rxn}}$ | $\Delta E^\ddagger$   | $\Delta E_{\text{rxn}}$ |
|              | <i>Dispersion-Corrected</i> |                         |                           |                         |                             |                         |                           |                         |                       |                         |
| BP86-D3(BJ)  | -10.8                       | 0.4                     | -7.1                      | 4.2                     | -4.0                        | 0.0                     | -9.1                      | 0.0                     | -15.5                 | 0.0                     |
| BLYP-D3(BJ)  | -6.5                        | 11.1                    | -4.5                      | 12.7                    | -1.1                        | 5.5                     | -5.8                      | 0.0                     | -9.4                  | 0.0                     |
| PBE-D3(BJ)   | -10.7                       | -1.8                    | -7.1                      | 2.6                     | -4.6                        | -1.7                    | -9.6                      | 0.0                     | -16.7                 | 0.0                     |
| OLYP-D3(BJ)  | -11.9                       | -2.6                    | -6.1                      | 3.0                     | -4.4                        | -1.6                    | -9.3                      | 0.0                     | -14.1                 | 0.0                     |
| OPBE-D3(BJ)  | -16.4                       | -14.6                   | -7.8                      | -5.2                    | -7.9                        | -8.6                    | -12.7                     | 0.0                     | -20.3                 | 0.0                     |
| B3LYP-D3(BJ) | -3.5                        | 5.0                     | -1.0                      | 5.8                     | 1.1                         | 3.5                     | -2.4                      | 0.0                     | -4.2                  | 0.0                     |
| PBE0-D3(BJ)  | -6.6                        | -7.7                    | -2.3                      | -4.3                    | -1.7                        | -3.6                    | -4.9                      | 0.0                     | -9.1                  | 0.0                     |
| M06-2X-D3    | -1.9                        | -1.2                    | 2.8                       | -0.9                    | 1.0                         | -0.6                    | -0.4                      | 0.0                     | -1.3                  | 0.0                     |

**Table S33.** Mean error (ME), mean absolute error (MAE), maximum unsigned error (MUE) and standard deviation (SD) of reaction barriers and energies (kcal mol<sup>-1</sup>) for the various pericyclic reactions, computed with XC/QZ4P//BP86/TZ2P compared to CCSDT(Q)/CBS//CCSD(T)/cc-pVTZ.

| XC              | $\Delta E^\ddagger$ |      |      |     | $\Delta E_{\text{rxn}}$ |                                |      |     | Total |      |      |     |
|-----------------|---------------------|------|------|-----|-------------------------|--------------------------------|------|-----|-------|------|------|-----|
|                 | ME                  | MAE  | MUE  | SD  | ME                      | MAE                            | MUE  | SD  | ME    | MAE  | MUE  | SD  |
| VWN             | -16.8               | 16.8 | 28.1 | 6.8 | -12.2                   | 12.2                           | 17.4 | 4.7 | -15.1 | 15.1 | 28.1 | 6.5 |
|                 |                     |      |      |     |                         | <i>LDA</i>                     |      |     |       |      |      |     |
|                 |                     |      |      |     |                         | <i>GGAs</i>                    |      |     |       |      |      |     |
| BP86            | -6.4                | 6.4  | 12.1 | 3.5 | 4.4                     | 4.6                            | 8.1  | 3.2 | -2.4  | 5.7  | 12.1 | 3.5 |
| BLYP            | -1.6                | 2.6  | 5.0  | 1.9 | 13.5                    | 13.5                           | 17.8 | 5.8 | 4.0   | 6.7  | 17.8 | 6.5 |
| BEE             | -5.9                | 5.9  | 11.8 | 3.9 | 3.8                     | 5.2                            | 8.9  | 2.8 | -2.3  | 5.7  | 11.8 | 3.5 |
| PW91            | -7.9                | 7.9  | 14.4 | 3.7 | 1.7                     | 2.4                            | 4.8  | 1.7 | -4.3  | 5.9  | 14.4 | 4.1 |
| PBE             | -7.9                | 7.9  | 14.4 | 3.7 | 1.6                     | 2.8                            | 5.2  | 1.7 | -4.3  | 5.9  | 14.4 | 4.0 |
| PBEsol          | -12.8               | 12.8 | 21.8 | 5.1 | -6.4                    | 6.4                            | 9.2  | 1.9 | -10.4 | 10.4 | 21.8 | 5.2 |
| RPBE            | -3.8                | 4.1  | 8.5  | 3.2 | 7.5                     | 7.6                            | 13.1 | 5.4 | 0.4   | 5.4  | 13.1 | 4.5 |
| revPBE          | -4.1                | 4.4  | 9.0  | 3.3 | 6.8                     | 7.3                            | 12.5 | 4.9 | 0.0   | 5.5  | 12.5 | 4.2 |
| mPBE            | -6.8                | 6.8  | 12.8 | 3.6 | 3.2                     | 4.0                            | 7.3  | 2.5 | -3.0  | 5.7  | 12.8 | 3.5 |
| mPW             | -5.8                | 5.8  | 11.3 | 3.4 | 4.9                     | 5.0                            | 9.1  | 3.7 | -1.8  | 5.5  | 11.3 | 3.5 |
| HTBS            | -8.0                | 8.0  | 14.7 | 4.2 | 0.5                     | 3.0                            | 4.8  | 1.8 | -4.8  | 6.1  | 14.7 | 4.3 |
| OLYP            | -0.8                | 4.8  | 6.0  | 1.0 | 8.5                     | 9.4                            | 15.3 | 5.9 | 2.7   | 6.5  | 15.3 | 4.3 |
| OPBE            | -4.9                | 6.3  | 11.2 | 4.1 | -0.9                    | 5.2                            | 8.4  | 3.2 | -3.4  | 5.9  | 11.2 | 3.8 |
| XLYP            | -1.2                | 2.3  | 4.3  | 1.7 | 14.6                    | 14.6                           | 18.8 | 5.9 | 4.7   | 6.9  | 18.8 | 7.1 |
|                 |                     |      |      |     |                         | <i>Meta-GGAs</i>               |      |     |       |      |      |     |
| M06-L           | -1.6                | 2.3  | 4.2  | 1.4 | 3.6                     | 5.3                            | 11.7 | 4.5 | 0.4   | 3.4  | 11.7 | 3.3 |
| MVS             | -5.9                | 6.0  | 13.5 | 5.0 | -1.6                    | 4.5                            | 6.6  | 1.6 | -4.3  | 5.4  | 13.5 | 4.1 |
| TPSS            | -4.6                | 4.6  | 7.3  | 1.8 | 5.2                     | 5.7                            | 9.1  | 3.6 | -0.9  | 5.0  | 9.1  | 2.7 |
| revTPSS         | -4.6                | 4.6  | 5.4  | 0.8 | 3.0                     | 4.5                            | 6.0  | 1.6 | -1.7  | 4.5  | 6.0  | 1.2 |
|                 |                     |      |      |     |                         | <i>Hybrids</i>                 |      |     |       |      |      |     |
| B3LYP           | 1.1                 | 2.0  | 3.4  | 1.0 | 7.8                     | 7.8                            | 10.2 | 3.2 | 3.6   | 4.2  | 10.2 | 3.5 |
| B3LYP*          | -0.8                | 2.0  | 3.5  | 1.2 | 7.3                     | 7.3                            | 9.6  | 3.0 | 2.3   | 4.0  | 9.6  | 3.3 |
| B1LYP           | 2.5                 | 2.7  | 4.7  | 1.7 | 7.9                     | 7.9                            | 10.4 | 3.0 | 4.5   | 4.6  | 10.4 | 3.4 |
| B1PW91          | -1.2                | 2.4  | 4.0  | 1.6 | -0.5                    | 1.9                            | 2.8  | 0.8 | -0.9  | 2.2  | 4.0  | 1.3 |
| BHandH          | -3.9                | 4.2  | 7.6  | 2.6 | -14.3                   | 14.3                           | 19.2 | 6.6 | -7.8  | 8.0  | 19.2 | 6.7 |
| BHandHLYP       | 6.7                 | 6.7  | 8.3  | 1.6 | 2.0                     | 2.0                            | 3.2  | 0.9 | 4.9   | 4.9  | 8.3  | 2.7 |
| KMLYP           | 1.3                 | 1.4  | 3.0  | 1.2 | -9.7                    | 9.7                            | 13.3 | 4.5 | -2.8  | 4.5  | 13.3 | 5.0 |
| O3LYP           | -17.3               | 17.3 | 28.3 | 7.4 | -20.1                   | 20.1                           | 27.9 | 8.5 | -18.4 | 18.4 | 28.3 | 8.0 |
| OPBE0           | -1.1                | 4.3  | 6.1  | 1.5 | -5.5                    | 5.5                            | 8.8  | 3.2 | -2.8  | 4.8  | 8.8  | 2.4 |
| PBE0            | -3.3                | 3.3  | 7.1  | 2.4 | -3.5                    | 3.5                            | 5.0  | 1.2 | -3.4  | 3.4  | 7.1  | 2.1 |
| mPW1PW          | -1.6                | 2.3  | 4.5  | 1.5 | -0.8                    | 1.6                            | 2.3  | 0.5 | -1.3  | 2.0  | 4.5  | 1.3 |
| mPW1K           | 1.4                 | 1.5  | 4.6  | 1.6 | -4.9                    | 4.9                            | 6.4  | 1.1 | -1.0  | 2.8  | 6.4  | 2.2 |
| S12H            | -2.3                | 2.7  | 6.0  | 1.9 | -3.2                    | 3.2                            | 5.5  | 2.1 | -2.7  | 2.9  | 6.0  | 2.0 |
| X3LYP           | 0.8                 | 1.8  | 2.8  | 0.6 | 6.6                     | 6.6                            | 8.6  | 2.5 | 3.0   | 3.6  | 8.6  | 2.8 |
|                 |                     |      |      |     |                         | <i>Meta-Hybrids</i>            |      |     |       |      |      |     |
| M06             | 0.0                 | 1.6  | 4.1  | 1.5 | 1.6                     | 2.6                            | 6.2  | 2.6 | 0.6   | 2.0  | 6.2  | 2.0 |
| M06-2X          | 0.1                 | 1.5  | 2.9  | 0.9 | -0.8                    | 0.8                            | 1.1  | 0.2 | -0.3  | 1.2  | 2.9  | 0.7 |
| M06-HF          | -1.0                | 1.6  | 5.7  | 2.0 | -3.7                    | 4.6                            | 11.7 | 5.1 | -2.1  | 2.7  | 11.7 | 3.8 |
| TPSSH           | -3.0                | 3.0  | 5.0  | 1.5 | 3.0                     | 4.0                            | 6.0  | 1.8 | -0.8  | 3.4  | 6.0  | 1.7 |
|                 |                     |      |      |     |                         | <i>Double-Hybrids</i>          |      |     |       |      |      |     |
| B2K-PLYP        | -0.7                | 1.0  | 1.4  | 0.3 | 0.7                     | 1.8                            | 3.7  | 1.3 | -0.2  | 1.3  | 3.7  | 0.9 |
| B2T-PLYP        | -0.2                | 0.9  | 1.7  | 0.4 | 3.0                     | 3.0                            | 6.1  | 2.3 | 1.0   | 1.7  | 6.1  | 1.7 |
| B2-PLYP         | -0.8                | 1.0  | 2.3  | 0.8 | 4.5                     | 4.5                            | 8.0  | 2.8 | 1.2   | 2.3  | 8.0  | 2.5 |
| LS1-TPSS        | -3.6                | 3.6  | 5.4  | 1.5 | -4.4                    | 4.4                            | 8.1  | 3.0 | -3.9  | 3.9  | 8.1  | 2.2 |
| mPW2K-PLYP      | -0.9                | 1.2  | 1.7  | 0.3 | 0.6                     | 1.7                            | 3.4  | 1.2 | -0.3  | 1.4  | 3.4  | 0.8 |
| mPW2-PLYP       | 0.0                 | 0.7  | 1.4  | 0.5 | 3.6                     | 3.6                            | 6.1  | 1.9 | 1.3   | 1.8  | 6.1  | 1.9 |
| PBE0-DH         | -1.9                | 2.1  | 4.1  | 1.3 | -6.0                    | 6.0                            | 8.7  | 1.8 | -3.4  | 3.6  | 8.7  | 2.5 |
| revDSD-BLYP     | -1.2                | 1.7  | 3.3  | 1.0 | 0.9                     | 1.5                            | 3.7  | 1.5 | -0.4  | 1.6  | 3.7  | 1.2 |
| revDSD-PBE      | -1.5                | 1.5  | 2.7  | 0.9 | -1.3                    | 2.6                            | 3.8  | 0.8 | -1.5  | 1.9  | 3.8  | 1.0 |
| revDSD-PBEP86   | 0.0                 | 0.4  | 0.8  | 0.2 | 0.6                     | 2.2                            | 4.2  | 1.4 | 0.2   | 1.1  | 4.2  | 1.2 |
|                 |                     |      |      |     |                         | <i>Range-Separated Hybrids</i> |      |     |       |      |      |     |
| CAM-B3LYP       | 2.4                 | 2.4  | 3.9  | 1.4 | 1.4                     | 1.4                            | 2.4  | 0.7 | 2.0   | 2.0  | 3.9  | 1.3 |
| CAMY-B3LYP      | 1.0                 | 1.5  | 2.3  | 0.8 | 2.4                     | 2.4                            | 3.3  | 0.7 | 1.5   | 1.8  | 3.3  | 0.9 |
| $\omega$ B97    | 3.4                 | 3.4  | 4.4  | 0.6 | -6.7                    | 6.7                            | 8.5  | 1.3 | -0.4  | 4.7  | 8.5  | 1.8 |
| $\omega$ B97X   | 2.6                 | 2.6  | 4.0  | 0.9 | -3.7                    | 3.7                            | 4.6  | 0.6 | 0.2   | 3.0  | 4.6  | 1.0 |
| $\omega$ B97X-D | 1.8                 | 2.0  | 4.7  | 1.8 | -0.4                    | 1.0                            | 2.2  | 0.9 | 1.0   | 1.6  | 4.7  | 1.6 |

**Table S33** (continued).

| XC           | $\Delta E^\ddagger$         |      |      |     | $\Delta E_{\text{rxn}}$ |     |      |     | Total |      |      |     |
|--------------|-----------------------------|------|------|-----|-------------------------|-----|------|-----|-------|------|------|-----|
|              | ME                          | MAE  | MUE  | SD  | ME                      | MAE | MUE  | SD  | ME    | MAE  | MUE  | SD  |
|              | <i>Dispersion-Corrected</i> |      |      |     |                         |     |      |     |       |      |      |     |
| BP86-D3(BJ)  | -9.3                        | 9.3  | 15.5 | 3.8 | 1.5                     | 1.6 | 4.2  | 1.9 | -5.2  | 6.4  | 15.5 | 5.0 |
| BLYP-D3(BJ)  | -5.5                        | 5.5  | 9.4  | 2.7 | 9.7                     | 9.7 | 12.7 | 3.1 | 0.2   | 7.1  | 12.7 | 3.5 |
| PBE-D3(BJ)   | -9.7                        | 9.7  | 16.7 | 4.1 | -0.3                    | 2.0 | 2.6  | 0.4 | -6.2  | 6.8  | 16.7 | 5.0 |
| OLYP-D3(BJ)  | -9.2                        | 9.2  | 14.1 | 3.6 | -0.4                    | 2.4 | 3.0  | 0.6 | -5.9  | 6.6  | 14.1 | 4.4 |
| OPBE-D3(BJ)  | -13.0                       | 13.0 | 20.3 | 4.9 | -9.4                    | 9.4 | 14.6 | 3.9 | -11.7 | 11.7 | 20.3 | 4.8 |
| B3LYP-D3(BJ) | -2.0                        | 2.4  | 4.2  | 1.3 | 4.7                     | 4.7 | 5.8  | 1.0 | 0.5   | 3.3  | 5.8  | 1.6 |
| PBE0-D3(BJ)  | -4.9                        | 4.9  | 9.1  | 2.7 | -5.2                    | 5.2 | 7.7  | 1.8 | -5.0  | 5.0  | 9.1  | 2.4 |
| M06-2X-D3    | 0.0                         | 1.5  | 2.8  | 0.8 | -0.9                    | 0.9 | 1.2  | 0.2 | -0.3  | 1.3  | 2.8  | 0.7 |

**Table S34.** Reaction barriers and reaction energies (kcal mol<sup>-1</sup>) for the various pericyclic reactions, computed with XC/TZ2P//BP86/QZ4P.

| XC              | Diels-Alder Reaction           |                         | 1,3-dipolar Cycloaddition |                         | Electrocyclic Rearrangement |                         | Sigmatropic Rearrangement |                         | Double Group Transfer |                         |
|-----------------|--------------------------------|-------------------------|---------------------------|-------------------------|-----------------------------|-------------------------|---------------------------|-------------------------|-----------------------|-------------------------|
|                 | $\Delta E^\ddagger$            | $\Delta E_{\text{rxn}}$ | $\Delta E^\ddagger$       | $\Delta E_{\text{rxn}}$ | $\Delta E^\ddagger$         | $\Delta E_{\text{rxn}}$ | $\Delta E^\ddagger$       | $\Delta E_{\text{rxn}}$ | $\Delta E^\ddagger$   | $\Delta E_{\text{rxn}}$ |
|                 | <i>LDA</i>                     |                         |                           |                         |                             |                         |                           |                         |                       |                         |
| VWN             | 1.0                            | -64.5                   | 3.3                       | -41.5                   | 36.6                        | 2.9                     | 21.9                      | 0.0                     | 22.1                  | 0.0                     |
|                 | <i>GGAs</i>                    |                         |                           |                         |                             |                         |                           |                         |                       |                         |
| BP86            | 15.2                           | -41.6                   | 15.5                      | -20.1                   | 39.9                        | 8.8                     | 28.2                      | 0.0                     | 38.1                  | 0.0                     |
| BLYP            | 21.1                           | -29.6                   | 19.4                      | -10.6                   | 43.0                        | 14.3                    | 31.9                      | 0.0                     | 45.2                  | 0.0                     |
| BEE             | 16.4                           | -42.3                   | 17.4                      | -19.1                   | 39.3                        | 7.1                     | 28.1                      | 0.0                     | 38.5                  | 0.0                     |
| PW91            | 12.6                           | -45.5                   | 13.5                      | -23.3                   | 39.6                        | 8.0                     | 27.8                      | 0.0                     | 35.8                  | 0.0                     |
| PBE             | 13.1                           | -45.6                   | 14.1                      | -22.9                   | 39.3                        | 7.4                     | 27.6                      | 0.0                     | 35.8                  | 0.0                     |
| PBEsol          | 7.0                            | -56.2                   | 9.1                       | -32.8                   | 37.1                        | 3.8                     | 24.0                      | 0.0                     | 28.4                  | 0.0                     |
| RPBE            | 19.0                           | -37.3                   | 19.4                      | -14.9                   | 40.4                        | 9.0                     | 29.9                      | 0.0                     | 41.8                  | 0.0                     |
| revPBE          | 18.7                           | -38.1                   | 19.2                      | -15.5                   | 40.1                        | 8.5                     | 29.5                      | 0.0                     | 41.3                  | 0.0                     |
| mPBE            | 14.6                           | -43.3                   | 15.5                      | -20.8                   | 39.6                        | 7.9                     | 28.3                      | 0.0                     | 37.5                  | 0.0                     |
| mPW             | 15.7                           | -41.2                   | 16.3                      | -19.0                   | 40.2                        | 8.9                     | 28.8                      | 0.0                     | 39.0                  | 0.0                     |
| HTBS            | 14.2                           | -46.4                   | 15.8                      | -23.1                   | 37.9                        | 5.4                     | 26.1                      | 0.0                     | 35.5                  | 0.0                     |
| OLYP            | 24.3                           | -35.1                   | 24.2                      | -12.6                   | 41.0                        | 8.0                     | 30.9                      | 0.0                     | 45.6                  | 0.0                     |
| OPBE            | 19.8                           | -47.8                   | 22.4                      | -21.0                   | 37.4                        | 1.2                     | 27.1                      | 0.0                     | 39.1                  | 0.0                     |
| XLYP            | 21.4                           | -28.4                   | 19.4                      | -9.7                    | 43.4                        | 15.1                    | 32.5                      | 0.0                     | 45.9                  | 0.0                     |
|                 | <i>Meta-GGAs</i>               |                         |                           |                         |                             |                         |                           |                         |                       |                         |
| M06-L           | 16.7                           | -44.9                   | 19.6                      | -16.6                   | 43.8                        | 6.9                     | 34.2                      | 0.0                     | 46.0                  | 0.0                     |
| MVS             | 12.2                           | -54.3                   | 18.1                      | -24.5                   | 43.1                        | 6.5                     | 28.2                      | 0.0                     | 36.7                  | 0.0                     |
| TPSS            | 15.7                           | -39.5                   | 16.1                      | -19.0                   | 40.6                        | 8.5                     | 31.0                      | 0.0                     | 42.9                  | 0.0                     |
| revTPSS         | 14.7                           | -41.7                   | 15.1                      | -22.1                   | 40.0                        | 6.9                     | 31.5                      | 0.0                     | 44.8                  | 0.0                     |
|                 | <i>Hybrids</i>                 |                         |                           |                         |                             |                         |                           |                         |                       |                         |
| B3LYP           | 22.6                           | -37.2                   | 21.7                      | -18.5                   | 45.0                        | 12.2                    | 35.0                      | 0.0                     | 49.5                  | 0.0                     |
| B3LYP*          | 20.7                           | -37.8                   | 19.9                      | -18.8                   | 44.0                        | 11.9                    | 33.5                      | 0.0                     | 46.6                  | 0.0                     |
| B1LYP           | 23.9                           | -37.0                   | 23.0                      | -18.9                   | 45.8                        | 12.5                    | 36.4                      | 0.0                     | 51.8                  | 0.0                     |
| B1PW91          | 19.6                           | -48.1                   | 21.2                      | -26.3                   | 42.7                        | 6.3                     | 33.0                      | 0.0                     | 46.0                  | 0.0                     |
| BHandH          | 12.8                           | -66.4                   | 14.8                      | -47.8                   | 44.4                        | 3.9                     | 34.1                      | 0.0                     | 42.4                  | 0.0                     |
| BHandHLYP       | 26.6                           | -44.5                   | 26.4                      | -27.6                   | 48.8                        | 10.6                    | 41.1                      | 0.0                     | 58.3                  | 0.0                     |
| KMLYP           | 19.0                           | -60.4                   | 20.8                      | -41.9                   | 46.7                        | 5.4                     | 37.8                      | 0.0                     | 50.1                  | 0.0                     |
| O3LYP           | -1.6                           | -75.2                   | 1.5                       | -52.4                   | 37.6                        | 0.7                     | 22.9                      | 0.0                     | 21.8                  | 0.0                     |
| OPBE0           | 21.5                           | -53.6                   | 24.6                      | -28.9                   | 40.6                        | 0.7                     | 31.7                      | 0.0                     | 45.3                  | 0.0                     |
| PBE0            | 16.6                           | -52.2                   | 18.4                      | -30.3                   | 42.1                        | 5.5                     | 32.1                      | 0.0                     | 43.0                  | 0.0                     |
| mPW1PW          | 18.7                           | -48.6                   | 20.2                      | -27.1                   | 42.9                        | 6.8                     | 33.2                      | 0.0                     | 45.6                  | 0.0                     |
| mPW1K           | 20.7                           | -53.9                   | 22.8                      | -33.1                   | 44.9                        | 5.2                     | 36.4                      | 0.0                     | 50.2                  | 0.0                     |
| S12H            | 16.4                           | -52.5                   | 19.4                      | -28.4                   | 43.1                        | 5.3                     | 34.1                      | 0.0                     | 44.2                  | 0.0                     |
| X3LYP           | 21.8                           | -38.8                   | 21.0                      | -20.3                   | 45.1                        | 12.0                    | 35.1                      | 0.0                     | 49.1                  | 0.0                     |
|                 | <i>Meta-Hybrids</i>            |                         |                           |                         |                             |                         |                           |                         |                       |                         |
| M06             | 19.3                           | -47.4                   | 22.3                      | -22.3                   | 43.6                        | 7.4                     | 34.9                      | 0.0                     | 48.4                  | 0.0                     |
| M06-2X          | 17.6                           | -49.0                   | 21.1                      | -29.7                   | 44.6                        | 8.1                     | 36.2                      | 0.0                     | 48.7                  | 0.0                     |
| M06-HF          | 14.5                           | -48.9                   | 19.5                      | -40.9                   | 42.9                        | 9.3                     | 37.4                      | 0.0                     | 50.8                  | 0.0                     |
| TPSSH           | 17.0                           | -42.6                   | 17.7                      | -22.2                   | 41.6                        | 7.6                     | 32.5                      | 0.0                     | 45.2                  | 0.0                     |
|                 | <i>Double-Hybrids</i>          |                         |                           |                         |                             |                         |                           |                         |                       |                         |
| B2K-PLYP        | 18.1                           | -48.8                   | 18.5                      | -25.0                   | 44.8                        | 8.8                     | 35.6                      | 0.0                     | 49.0                  | 0.0                     |
| B2T-PLYP        | 19.1                           | -45.5                   | 19.0                      | -22.6                   | 44.7                        | 9.8                     | 35.3                      | 0.0                     | 49.0                  | 0.0                     |
| B2-PLYP         | 19.1                           | -43.5                   | 18.8                      | -20.6                   | 44.4                        | 10.4                    | 34.7                      | 0.0                     | 48.2                  | 0.0                     |
| LS1-TPSS        | 14.2                           | -55.9                   | 16.2                      | -29.1                   | 43.0                        | 5.3                     | 33.7                      | 0.0                     | 45.3                  | 0.0                     |
| mPW2K-PLYP      | 17.8                           | -48.9                   | 18.1                      | -25.3                   | 44.9                        | 9.0                     | 35.7                      | 0.0                     | 48.8                  | 0.0                     |
| mPW2-PLYP       | 19.4                           | -44.5                   | 19.1                      | -22.6                   | 45.2                        | 10.5                    | 35.8                      | 0.0                     | 49.4                  | 0.0                     |
| PBE0-DH         | 16.9                           | -56.4                   | 19.1                      | -33.2                   | 43.3                        | 4.5                     | 34.1                      | 0.0                     | 45.8                  | 0.0                     |
| revDSD-BLYP     | 17.0                           | -49.3                   | 17.6                      | -25.4                   | 45.0                        | 9.2                     | 36.6                      | 0.0                     | 49.1                  | 0.0                     |
| revDSD-PBE      | 16.3                           | -52.3                   | 17.5                      | -27.1                   | 43.8                        | 7.0                     | 35.7                      | 0.0                     | 47.1                  | 0.0                     |
| revDSD-PBEP86   | 18.4                           | -49.6                   | 19.2                      | -24.9                   | 44.6                        | 7.9                     | 36.8                      | 0.0                     | 49.3                  | 0.0                     |
|                 | <i>Range-Separated Hybrids</i> |                         |                           |                         |                             |                         |                           |                         |                       |                         |
| CAM-B3LYP       | 23.4                           | -45.2                   | 22.0                      | -27.6                   | 46.2                        | 9.6                     | 37.2                      | 0.0                     | 51.6                  | 0.0                     |
| CAMY-B3LYP      | 21.5                           | -44.2                   | 20.6                      | -26.1                   | 45.5                        | 10.3                    | 36.0                      | 0.0                     | 49.6                  | 0.0                     |
| $\omega$ B97    | 23.0                           | -55.6                   | 22.5                      | -34.7                   | 46.7                        | 4.0                     | 40.2                      | 0.0                     | 53.3                  | 0.0                     |
| $\omega$ B97X   | 22.5                           | -51.9                   | 22.1                      | -31.9                   | 46.2                        | 6.0                     | 38.7                      | 0.0                     | 51.8                  | 0.0                     |
| $\omega$ B97X-D | 22.9                           | -47.5                   | 22.9                      | -27.9                   | 45.0                        | 6.8                     | 36.4                      | 0.0                     | 50.3                  | 0.0                     |



**Table S34** (continued).

| XC           | Diels-Alder Reaction        |                         | 1,3-dipolar Cycloaddition |                         | Electrocyclic Rearrangement |                         | Sigmatropic Rearrangement |                         | Double Group Transfer |                         |
|--------------|-----------------------------|-------------------------|---------------------------|-------------------------|-----------------------------|-------------------------|---------------------------|-------------------------|-----------------------|-------------------------|
|              | $\Delta E^\ddagger$         | $\Delta E_{\text{rxn}}$ | $\Delta E^\ddagger$       | $\Delta E_{\text{rxn}}$ | $\Delta E^\ddagger$         | $\Delta E_{\text{rxn}}$ | $\Delta E^\ddagger$       | $\Delta E_{\text{rxn}}$ | $\Delta E^\ddagger$   | $\Delta E_{\text{rxn}}$ |
|              | <i>Dispersion-Corrected</i> |                         |                           |                         |                             |                         |                           |                         |                       |                         |
| BP86-D3(BJ)  | 9.0                         | -46.5                   | 11.3                      | -24.0                   | 39.7                        | 9.0                     | 27.7                      | 0.0                     | 34.7                  | 0.0                     |
| BLYP-D3(BJ)  | 13.2                        | -35.9                   | 14.0                      | -15.7                   | 42.6                        | 14.4                    | 31.0                      | 0.0                     | 40.9                  | 0.0                     |
| PBE-D3(BJ)   | 9.0                         | -46.5                   | 11.3                      | -24.0                   | 39.7                        | 9.0                     | 44.5                      | 0.0                     | 34.7                  | 0.0                     |
| OLYP-D3(BJ)  | 7.9                         | -49.3                   | 12.6                      | -24.8                   | 39.5                        | 7.8                     | 27.7                      | 0.0                     | 36.3                  | 0.0                     |
| OPBE-D3(BJ)  | 3.6                         | -61.1                   | 11.0                      | -32.6                   | 36.2                        | 1.1                     | 24.3                      | 0.0                     | 30.0                  | 0.0                     |
| B3LYP-D3(BJ) | 16.1                        | -42.4                   | 17.3                      | -22.7                   | 44.7                        | 12.3                    | 34.4                      | 0.0                     | 45.9                  | 0.0                     |
| PBE0-D3(BJ)  | 13.1                        | -55.0                   | 16.0                      | -32.5                   | 42.0                        | 5.5                     | 31.9                      | 0.0                     | 41.0                  | 0.0                     |
| M06-2X-D3    | 17.5                        | -49.1                   | 21.0                      | -29.8                   | 44.6                        | 8.1                     | 36.3                      | 0.0                     | 48.6                  | 0.0                     |

**Table S35.** Errors in reaction barriers and reaction energies (kcal mol<sup>-1</sup>) for the various pericyclic reactions, computed with XC/TZ2P//BP86/QZ4P, compared to CCSDT(Q)/CBS//CCSD(T)/cc-pVTZ.

| XC              | Diels-Alder Reaction           |                         | 1,3-dipolar Cycloaddition |                         | Electrocyclic Rearrangement |                         | Sigmatropic Rearrangement |                         | Double Group Transfer |                         |  |
|-----------------|--------------------------------|-------------------------|---------------------------|-------------------------|-----------------------------|-------------------------|---------------------------|-------------------------|-----------------------|-------------------------|--|
|                 | $\Delta E^\ddagger$            | $\Delta E_{\text{rxn}}$ | $\Delta E^\ddagger$       | $\Delta E_{\text{rxn}}$ | $\Delta E^\ddagger$         | $\Delta E_{\text{rxn}}$ | $\Delta E^\ddagger$       | $\Delta E_{\text{rxn}}$ | $\Delta E^\ddagger$   | $\Delta E_{\text{rxn}}$ |  |
|                 | <i>LDA</i>                     |                         |                           |                         |                             |                         |                           |                         |                       |                         |  |
| VWN             | -18.6                          | -16.9                   | -15.0                     | -12.6                   | -6.8                        | -5.6                    | -14.9                     | 0.0                     | -28.1                 | 0.0                     |  |
|                 | <i>GGAs</i>                    |                         |                           |                         |                             |                         |                           |                         |                       |                         |  |
| BP86            | -4.4                           | 6.1                     | -2.8                      | 8.8                     | -3.5                        | 0.4                     | -8.6                      | 0.0                     | -12.1                 | 0.0                     |  |
| BLYP            | 1.5                            | 18.1                    | 1.1                       | 18.3                    | -0.4                        | 5.9                     | -4.9                      | 0.0                     | -5.0                  | 0.0                     |  |
| BEE             | -3.2                           | 5.4                     | -0.9                      | 9.8                     | -4.1                        | -1.4                    | -8.7                      | 0.0                     | -11.7                 | 0.0                     |  |
| PW91            | -7.0                           | 2.2                     | -4.8                      | 5.6                     | -3.8                        | -0.4                    | -9.0                      | 0.0                     | -14.4                 | 0.0                     |  |
| PBE             | -6.5                           | 2.1                     | -4.2                      | 6.0                     | -4.1                        | -1.1                    | -9.2                      | 0.0                     | -14.4                 | 0.0                     |  |
| PBEsol          | -12.6                          | -8.6                    | -9.2                      | -3.9                    | -6.3                        | -4.7                    | -12.8                     | 0.0                     | -21.8                 | 0.0                     |  |
| RPBE            | -0.6                           | 10.4                    | 1.1                       | 14.0                    | -3.0                        | 0.6                     | -6.9                      | 0.0                     | -8.4                  | 0.0                     |  |
| revPBE          | -0.9                           | 9.6                     | 0.9                       | 13.4                    | -3.3                        | 0.1                     | -7.3                      | 0.0                     | -8.9                  | 0.0                     |  |
| mPBE            | -5.0                           | 4.4                     | -2.8                      | 8.1                     | -3.8                        | -0.5                    | -8.5                      | 0.0                     | -12.7                 | 0.0                     |  |
| mPW             | -3.9                           | 6.5                     | -2.0                      | 9.9                     | -3.2                        | 0.5                     | -8.0                      | 0.0                     | -11.2                 | 0.0                     |  |
| HTBS            | -5.4                           | 1.3                     | -2.5                      | 5.8                     | -5.5                        | -3.1                    | -10.7                     | 0.0                     | -14.7                 | 0.0                     |  |
| OLYP            | 4.7                            | 12.6                    | 5.9                       | 16.3                    | -2.4                        | -0.4                    | -5.9                      | 0.0                     | -4.6                  | 0.0                     |  |
| OPBE            | 0.2                            | -0.1                    | 4.1                       | 7.9                     | -6.0                        | -7.3                    | -9.7                      | 0.0                     | -11.1                 | 0.0                     |  |
| XLYP            | 1.8                            | 19.3                    | 1.1                       | 19.2                    | 0.0                         | 6.7                     | -4.3                      | 0.0                     | -4.3                  | 0.0                     |  |
|                 | <i>Meta-GGAs</i>               |                         |                           |                         |                             |                         |                           |                         |                       |                         |  |
| M06-L           | -2.9                           | 2.8                     | 1.3                       | 12.3                    | 0.4                         | -1.6                    | -2.6                      | 0.0                     | -4.2                  | 0.0                     |  |
| MVS             | -7.4                           | -6.7                    | -0.2                      | 4.4                     | -0.3                        | -2.0                    | -8.6                      | 0.0                     | -13.5                 | 0.0                     |  |
| TPSS            | -3.9                           | 8.2                     | -2.2                      | 9.9                     | -2.8                        | 0.1                     | -5.8                      | 0.0                     | -7.3                  | 0.0                     |  |
| revTPSS         | -4.9                           | 6.0                     | -3.2                      | 6.8                     | -3.4                        | -1.6                    | -5.3                      | 0.0                     | -5.4                  | 0.0                     |  |
|                 | <i>Hybrids</i>                 |                         |                           |                         |                             |                         |                           |                         |                       |                         |  |
| B3LYP           | 3.0                            | 10.5                    | 3.4                       | 10.4                    | 1.6                         | 3.8                     | -1.8                      | 0.0                     | -0.7                  | 0.0                     |  |
| B3LYP*          | 1.1                            | 9.9                     | 1.6                       | 10.1                    | 0.6                         | 3.5                     | -3.3                      | 0.0                     | -3.6                  | 0.0                     |  |
| B1LYP           | 4.3                            | 10.7                    | 4.7                       | 10.0                    | 2.4                         | 4.1                     | -0.4                      | 0.0                     | 1.6                   | 0.0                     |  |
| B1PW91          | 0.0                            | -0.5                    | 2.9                       | 2.6                     | -0.7                        | -2.2                    | -3.8                      | 0.0                     | -4.2                  | 0.0                     |  |
| BHandH          | -6.8                           | -18.8                   | -3.5                      | -18.9                   | 1.0                         | -4.6                    | -2.7                      | 0.0                     | -7.8                  | 0.0                     |  |
| BHandHLYP       | 7.0                            | 3.2                     | 8.1                       | 1.3                     | 5.4                         | 2.2                     | 4.3                       | 0.0                     | 8.1                   | 0.0                     |  |
| KMLYP           | -0.6                           | -12.8                   | 2.5                       | -13.0                   | 3.3                         | -3.1                    | 1.0                       | 0.0                     | -0.1                  | 0.0                     |  |
| O3LYP           | -21.2                          | -27.6                   | -16.8                     | -23.5                   | -5.8                        | -7.8                    | -13.9                     | 0.0                     | -28.4                 | 0.0                     |  |
| OPBE0           | 1.9                            | -6.0                    | 6.3                       | 0.0                     | -2.8                        | -7.8                    | -5.1                      | 0.0                     | -4.9                  | 0.0                     |  |
| PBE0            | -3.0                           | -4.6                    | 0.1                       | -1.4                    | -1.3                        | -3.0                    | -4.7                      | 0.0                     | -7.2                  | 0.0                     |  |
| mPW1PW          | -0.9                           | -1.0                    | 1.9                       | 1.8                     | -0.5                        | -1.7                    | -3.6                      | 0.0                     | -4.6                  | 0.0                     |  |
| mPW1K           | 1.1                            | -6.3                    | 4.5                       | -4.2                    | 1.5                         | -3.3                    | -0.4                      | 0.0                     | 0.0                   | 0.0                     |  |
| S12H            | -3.2                           | -4.9                    | 1.1                       | 0.5                     | -0.3                        | -3.2                    | -2.7                      | 0.0                     | -6.0                  | 0.0                     |  |
| X3LYP           | 2.2                            | 8.9                     | 2.7                       | 8.6                     | 1.7                         | 3.6                     | -1.7                      | 0.0                     | -1.1                  | 0.0                     |  |
|                 | <i>Meta-Hybrids</i>            |                         |                           |                         |                             |                         |                           |                         |                       |                         |  |
| M06             | -0.3                           | 0.3                     | 4.0                       | 6.6                     | 0.2                         | -1.1                    | -1.9                      | 0.0                     | -1.8                  | 0.0                     |  |
| M06-2X          | -2.0                           | -1.4                    | 2.8                       | -0.8                    | 1.2                         | -0.4                    | -0.6                      | 0.0                     | -1.5                  | 0.0                     |  |
| M06-HF          | -5.1                           | -1.3                    | 1.2                       | -12.0                   | -0.5                        | 0.9                     | 0.6                       | 0.0                     | 0.6                   | 0.0                     |  |
| TPSSH           | -2.6                           | 5.1                     | -0.6                      | 6.7                     | -1.8                        | -0.9                    | -4.3                      | 0.0                     | -5.0                  | 0.0                     |  |
|                 | <i>Double-Hybrids</i>          |                         |                           |                         |                             |                         |                           |                         |                       |                         |  |
| B2K-PLYP        | -1.5                           | -1.2                    | 0.2                       | 3.9                     | 1.4                         | 0.4                     | -1.2                      | 0.0                     | -1.2                  | 0.0                     |  |
| B2T-PLYP        | -0.5                           | 2.2                     | 0.7                       | 6.3                     | 1.3                         | 1.4                     | -1.5                      | 0.0                     | -1.2                  | 0.0                     |  |
| B2-PLYP         | -0.5                           | 4.2                     | 0.5                       | 8.3                     | 1.0                         | 2.0                     | -2.1                      | 0.0                     | -2.0                  | 0.0                     |  |
| LS1-TPSS        | -5.4                           | -8.3                    | -2.1                      | -0.2                    | -0.4                        | -3.2                    | -3.1                      | 0.0                     | -4.9                  | 0.0                     |  |
| mPW2K-PLYP      | -1.8                           | -1.3                    | -0.2                      | 3.6                     | 1.5                         | 0.6                     | -1.1                      | 0.0                     | -1.4                  | 0.0                     |  |
| mPW2-PLYP       | -0.2                           | 3.2                     | 0.8                       | 6.3                     | 1.8                         | 2.1                     | -1.0                      | 0.0                     | -0.8                  | 0.0                     |  |
| PBE0-DH         | -2.7                           | -8.8                    | 0.8                       | -4.3                    | -0.1                        | -4.0                    | -2.7                      | 0.0                     | -4.4                  | 0.0                     |  |
| revDSD-BLYP     | -2.6                           | -1.7                    | -0.7                      | 3.5                     | 1.6                         | 0.8                     | -0.2                      | 0.0                     | -1.1                  | 0.0                     |  |
| revDSD-PBE      | -3.3                           | -4.7                    | -0.8                      | 1.8                     | 0.4                         | -1.5                    | -1.1                      | 0.0                     | -3.1                  | 0.0                     |  |
| revDSD-PBEP86   | -1.2                           | -2.0                    | 0.9                       | 4.0                     | 1.2                         | -0.5                    | 0.0                       | 0.0                     | -0.9                  | 0.0                     |  |
|                 | <i>Range-Separated Hybrids</i> |                         |                           |                         |                             |                         |                           |                         |                       |                         |  |
| CAM-B3LYP       | 3.8                            | 2.5                     | 3.7                       | 1.3                     | 2.8                         | 1.2                     | 0.4                       | 0.0                     | 1.4                   | 0.0                     |  |
| CAMY-B3LYP      | 1.9                            | 3.5                     | 2.3                       | 2.8                     | 2.1                         | 1.9                     | -0.8                      | 0.0                     | -0.6                  | 0.0                     |  |
| $\omega$ B97    | 3.4                            | -8.0                    | 4.2                       | -5.8                    | 3.3                         | -4.5                    | 3.4                       | 0.0                     | 3.1                   | 0.0                     |  |
| $\omega$ B97X   | 2.9                            | -4.3                    | 3.8                       | -3.0                    | 2.8                         | -2.5                    | 1.9                       | 0.0                     | 1.6                   | 0.0                     |  |
| $\omega$ B97X-D | 3.3                            | 0.1                     | 4.6                       | 1.0                     | 1.6                         | -1.7                    | -0.4                      | 0.0                     | 0.1                   | 0.0                     |  |

**Table S35** (continued).

| XC           | Diels-Alder Reaction        |                         | 1,3-dipolar Cycloaddition |                         | Electrocyclic Rearrangement |                         | Sigmatropic Rearrangement |                         | Double Group Transfer |                         |
|--------------|-----------------------------|-------------------------|---------------------------|-------------------------|-----------------------------|-------------------------|---------------------------|-------------------------|-----------------------|-------------------------|
|              | $\Delta E^\ddagger$         | $\Delta E_{\text{rxn}}$ | $\Delta E^\ddagger$       | $\Delta E_{\text{rxn}}$ | $\Delta E^\ddagger$         | $\Delta E_{\text{rxn}}$ | $\Delta E^\ddagger$       | $\Delta E_{\text{rxn}}$ | $\Delta E^\ddagger$   | $\Delta E_{\text{rxn}}$ |
|              | <i>Dispersion-Corrected</i> |                         |                           |                         |                             |                         |                           |                         |                       |                         |
| BP86-D3(BJ)  | -10.6                       | 1.2                     | -7.0                      | 4.9                     | -3.7                        | 0.6                     | -9.1                      | 0.0                     | -15.5                 | 0.0                     |
| BLYP-D3(BJ)  | -6.4                        | 11.8                    | -4.3                      | 13.2                    | -0.8                        | 6.0                     | -5.8                      | 0.0                     | -9.3                  | 0.0                     |
| PBE-D3(BJ)   | -10.6                       | 1.2                     | -7.0                      | 4.9                     | -3.7                        | 0.6                     | 7.7                       | 0.0                     | -15.5                 | 0.0                     |
| OLYP-D3(BJ)  | -11.7                       | -1.7                    | -5.7                      | 4.1                     | -3.9                        | -0.6                    | -9.1                      | 0.0                     | -13.9                 | 0.0                     |
| OPBE-D3(BJ)  | -16.0                       | -13.5                   | -7.3                      | -3.7                    | -7.2                        | -7.4                    | -12.5                     | 0.0                     | -20.2                 | 0.0                     |
| B3LYP-D3(BJ) | -3.5                        | 5.3                     | -1.0                      | 6.2                     | 1.3                         | 3.9                     | -2.4                      | 0.0                     | -4.3                  | 0.0                     |
| PBE0-D3(BJ)  | -6.5                        | -7.4                    | -2.3                      | -3.6                    | -1.4                        | -3.0                    | -4.9                      | 0.0                     | -9.2                  | 0.0                     |
| M06-2X-D3    | -2.1                        | -1.5                    | 2.7                       | -0.9                    | 1.2                         | -0.4                    | -0.5                      | 0.0                     | -1.6                  | 0.0                     |

**Table S36.** Mean error (ME), mean absolute error (MAE), maximum unsigned error (MUE) and standard deviation (SD) of reaction barriers and energies (kcal mol<sup>-1</sup>) for the various pericyclic reactions, computed with XC/TZ2P//BP86/QZ4P compared to CCSDT(Q)/CBS//CCSD(T)/cc-pVTZ.

| XC              | $\Delta E^\ddagger$ |      |      |     | $\Delta E_{\text{rxn}}$ |                                |      |     | Total |      |      |     |
|-----------------|---------------------|------|------|-----|-------------------------|--------------------------------|------|-----|-------|------|------|-----|
|                 | ME                  | MAE  | MUE  | SD  | ME                      | MAE                            | MUE  | SD  | ME    | MAE  | MUE  | SD  |
| VWN             | -16.7               | 16.7 | 28.1 | 6.9 | -11.7                   | 11.7                           | 16.9 | 4.7 | -14.8 | 14.8 | 28.1 | 6.6 |
|                 |                     |      |      |     |                         | <i>LDA</i>                     |      |     |       |      |      |     |
|                 |                     |      |      |     |                         | <i>GGAs</i>                    |      |     |       |      |      |     |
| BP86            | -6.3                | 6.3  | 12.1 | 3.5 | 5.1                     | 5.1                            | 8.8  | 3.5 | -2.0  | 5.8  | 12.1 | 3.6 |
| BLYP            | -1.5                | 2.6  | 5.0  | 2.0 | 14.1                    | 14.1                           | 18.3 | 5.8 | 4.3   | 6.9  | 18.3 | 6.8 |
| BEE             | -5.7                | 5.7  | 11.7 | 3.9 | 4.6                     | 5.5                            | 9.8  | 3.4 | -1.9  | 5.6  | 11.7 | 3.8 |
| PW91            | -7.8                | 7.8  | 14.4 | 3.8 | 2.4                     | 2.7                            | 5.6  | 2.1 | -4.0  | 5.9  | 14.4 | 4.1 |
| PBE             | -7.7                | 7.7  | 14.4 | 3.8 | 2.3                     | 3.0                            | 6.0  | 2.1 | -3.9  | 5.9  | 14.4 | 4.0 |
| PBEsol          | -12.5               | 12.5 | 21.8 | 5.2 | -5.7                    | 5.7                            | 8.6  | 2.0 | -10.0 | 10.0 | 21.8 | 5.4 |
| RPBE            | -3.6                | 4.0  | 8.4  | 3.1 | 8.3                     | 8.3                            | 14.0 | 5.7 | 0.9   | 5.6  | 14.0 | 4.7 |
| revPBE          | -3.9                | 4.3  | 8.9  | 3.3 | 7.7                     | 7.7                            | 13.4 | 5.6 | 0.4   | 5.5  | 13.4 | 4.6 |
| mPBE            | -6.6                | 6.6  | 12.7 | 3.6 | 4.0                     | 4.3                            | 8.1  | 3.1 | -2.6  | 5.7  | 12.7 | 3.6 |
| mPW             | -5.7                | 5.7  | 11.2 | 3.4 | 5.6                     | 5.6                            | 9.9  | 3.9 | -1.4  | 5.6  | 11.2 | 3.6 |
| HTBS            | -7.8                | 7.8  | 14.7 | 4.4 | 1.3                     | 3.4                            | 5.8  | 1.9 | -4.4  | 6.1  | 14.7 | 4.2 |
| OLYP            | -0.5                | 4.7  | 5.9  | 1.3 | 9.5                     | 9.8                            | 16.3 | 6.8 | 3.3   | 6.6  | 16.3 | 4.9 |
| OPBE            | -4.5                | 6.2  | 11.1 | 3.9 | 0.2                     | 5.1                            | 7.9  | 3.5 | -2.8  | 5.8  | 11.1 | 3.8 |
| XLYP            | -1.1                | 2.3  | 4.3  | 1.7 | 15.0                    | 15.0                           | 19.3 | 5.9 | 4.9   | 7.1  | 19.3 | 7.3 |
|                 |                     |      |      |     |                         | <i>Meta-GGAs</i>               |      |     |       |      |      |     |
| M06-L           | -1.6                | 2.3  | 4.2  | 1.3 | 4.5                     | 5.5                            | 12.3 | 4.8 | 0.7   | 3.5  | 12.3 | 3.5 |
| MVS             | -6.0                | 6.0  | 13.5 | 5.1 | -1.4                    | 4.3                            | 6.7  | 1.9 | -4.3  | 5.4  | 13.5 | 4.3 |
| TPSS            | -4.4                | 4.4  | 7.3  | 1.9 | 6.0                     | 6.0                            | 9.9  | 4.3 | -0.5  | 5.0  | 9.9  | 3.1 |
| revTPSS         | -4.4                | 4.4  | 5.4  | 0.9 | 3.7                     | 4.8                            | 6.8  | 2.3 | -1.4  | 4.6  | 6.8  | 1.6 |
|                 |                     |      |      |     |                         | <i>Hybrids</i>                 |      |     |       |      |      |     |
| B3LYP           | 1.1                 | 2.1  | 3.4  | 1.0 | 8.2                     | 8.2                            | 10.5 | 3.1 | 3.8   | 4.4  | 10.5 | 3.6 |
| B3LYP*          | -0.7                | 2.0  | 3.6  | 1.2 | 7.8                     | 7.8                            | 10.1 | 3.1 | 2.5   | 4.2  | 10.1 | 3.5 |
| B1LYP           | 2.5                 | 2.7  | 4.7  | 1.6 | 8.2                     | 8.2                            | 10.7 | 3.0 | 4.7   | 4.8  | 10.7 | 3.5 |
| B1PW91          | -1.2                | 2.3  | 4.2  | 1.7 | 0.0                     | 1.7                            | 2.6  | 0.9 | -0.7  | 2.1  | 4.2  | 1.5 |
| BHandH          | -4.0                | 4.3  | 7.8  | 2.6 | -14.1                   | 14.1                           | 18.9 | 6.7 | -7.8  | 8.0  | 18.9 | 6.6 |
| BHandHLYP       | 6.6                 | 6.6  | 8.1  | 1.5 | 2.2                     | 2.2                            | 3.2  | 0.8 | 4.9   | 4.9  | 8.1  | 2.5 |
| KMLYP           | 1.2                 | 1.5  | 3.3  | 1.2 | -9.6                    | 9.6                            | 13.0 | 4.6 | -2.8  | 4.5  | 13.0 | 4.9 |
| O3LYP           | -17.2               | 17.2 | 28.4 | 7.5 | -19.6                   | 19.6                           | 27.6 | 8.5 | -18.1 | 18.1 | 28.4 | 8.0 |
| OPBE0           | -0.9                | 4.2  | 6.3  | 1.6 | -4.6                    | 4.6                            | 7.8  | 3.3 | -2.3  | 4.4  | 7.8  | 2.4 |
| PBE0            | -3.2                | 3.3  | 7.2  | 2.5 | -3.0                    | 3.0                            | 4.6  | 1.3 | -3.1  | 3.2  | 7.2  | 2.1 |
| mPW1PW          | -1.5                | 2.3  | 4.6  | 1.6 | -0.3                    | 1.5                            | 1.8  | 0.4 | -1.1  | 2.0  | 4.6  | 1.3 |
| mPW1K           | 1.3                 | 1.5  | 4.5  | 1.6 | -4.6                    | 4.6                            | 6.3  | 1.2 | -0.9  | 2.7  | 6.3  | 2.1 |
| S12H            | -2.2                | 2.7  | 6.0  | 2.0 | -2.5                    | 2.8                            | 4.9  | 1.8 | -2.3  | 2.7  | 6.0  | 1.9 |
| X3LYP           | 0.8                 | 1.9  | 2.7  | 0.5 | 7.0                     | 7.0                            | 8.9  | 2.4 | 3.1   | 3.8  | 8.9  | 2.9 |
|                 |                     |      |      |     |                         | <i>Meta-Hybrids</i>            |      |     |       |      |      |     |
| M06             | 0.0                 | 1.6  | 4.0  | 1.4 | 1.9                     | 2.6                            | 6.6  | 2.8 | 0.7   | 2.0  | 6.6  | 2.1 |
| M06-2X          | 0.0                 | 1.6  | 2.8  | 0.7 | -0.8                    | 0.8                            | 1.4  | 0.4 | -0.3  | 1.3  | 2.8  | 0.7 |
| M06-HF          | -0.6                | 1.6  | 5.1  | 1.7 | -4.1                    | 4.7                            | 12.0 | 5.2 | -2.0  | 2.8  | 12.0 | 3.8 |
| TPSSH           | -2.9                | 2.9  | 5.0  | 1.6 | 3.6                     | 4.2                            | 6.7  | 2.4 | -0.4  | 3.4  | 6.7  | 2.1 |
|                 |                     |      |      |     |                         | <i>Double-Hybrids</i>          |      |     |       |      |      |     |
| B2K-PLYP        | -0.5                | 1.1  | 1.5  | 0.5 | 1.0                     | 1.8                            | 3.9  | 1.5 | 0.1   | 1.4  | 3.9  | 1.0 |
| B2T-PLYP        | -0.2                | 1.0  | 1.5  | 0.4 | 3.3                     | 3.3                            | 6.3  | 2.2 | 1.1   | 1.9  | 6.3  | 1.7 |
| B2-PLYP         | -0.6                | 1.2  | 2.1  | 0.7 | 4.8                     | 4.8                            | 8.3  | 2.6 | 1.4   | 2.6  | 8.3  | 2.4 |
| LS1-TPSS        | -3.2                | 3.2  | 5.4  | 1.8 | -3.9                    | 3.9                            | 8.3  | 3.3 | -3.4  | 3.4  | 8.3  | 2.5 |
| mPW2K-PLYP      | -0.6                | 1.2  | 1.8  | 0.5 | 1.0                     | 1.8                            | 3.6  | 1.3 | 0.0   | 1.4  | 3.6  | 0.9 |
| mPW2-PLYP       | 0.1                 | 0.9  | 1.8  | 0.5 | 3.8                     | 3.8                            | 6.3  | 1.8 | 1.5   | 2.0  | 6.3  | 1.8 |
| PBE0-DH         | -1.8                | 2.1  | 4.4  | 1.5 | -5.7                    | 5.7                            | 8.8  | 2.2 | -3.3  | 3.5  | 8.8  | 2.5 |
| revDSD-BLYP     | -0.6                | 1.2  | 2.6  | 0.8 | 0.9                     | 2.0                            | 3.5  | 1.1 | -0.1  | 1.5  | 3.5  | 1.0 |
| revDSD-PBE      | -1.6                | 1.7  | 3.3  | 1.2 | -1.4                    | 2.6                            | 4.7  | 1.4 | -1.5  | 2.1  | 4.7  | 1.4 |
| revDSD-PBEP86   | 0.0                 | 0.8  | 1.2  | 0.4 | 0.5                     | 2.2                            | 4.0  | 1.4 | 0.2   | 1.3  | 4.0  | 1.1 |
|                 |                     |      |      |     |                         | <i>Range-Separated Hybrids</i> |      |     |       |      |      |     |
| CAM-B3LYP       | 2.4                 | 2.4  | 3.8  | 1.3 | 1.6                     | 1.6                            | 2.5  | 0.6 | 2.1   | 2.1  | 3.8  | 1.2 |
| CAMY-B3LYP      | 1.0                 | 1.5  | 2.3  | 0.7 | 2.7                     | 2.7                            | 3.5  | 0.7 | 1.6   | 2.0  | 3.5  | 0.9 |
| $\omega$ B97    | 3.5                 | 3.5  | 4.2  | 0.4 | -6.1                    | 6.1                            | 8.0  | 1.4 | -0.1  | 4.5  | 8.0  | 1.6 |
| $\omega$ B97X   | 2.6                 | 2.6  | 3.8  | 0.8 | -3.2                    | 3.2                            | 4.3  | 0.7 | 0.4   | 2.8  | 4.3  | 0.8 |
| $\omega$ B97X-D | 1.8                 | 2.0  | 4.6  | 1.7 | -0.2                    | 0.9                            | 1.7  | 0.6 | 1.1   | 1.6  | 4.6  | 1.5 |

**Table S36** (continued).

| XC           | $\Delta E^\ddagger$         |      |      |     | $\Delta E_{\text{rxn}}$ |      |      |     | Total |      |      |     |
|--------------|-----------------------------|------|------|-----|-------------------------|------|------|-----|-------|------|------|-----|
|              | ME                          | MAE  | MUE  | SD  | ME                      | MAE  | MUE  | SD  | ME    | MAE  | MUE  | SD  |
|              | <i>Dispersion-Corrected</i> |      |      |     |                         |      |      |     |       |      |      |     |
| BP86-D3(BJ)  | -9.2                        | 9.2  | 15.5 | 3.9 | 2.2                     | 2.2  | 4.9  | 1.9 | -4.9  | 6.6  | 15.5 | 4.7 |
| BLYP-D3(BJ)  | -5.3                        | 5.3  | 9.3  | 2.8 | 10.3                    | 10.3 | 13.2 | 3.1 | 0.5   | 7.2  | 13.2 | 3.8 |
| PBE-D3(BJ)   | -5.8                        | 8.9  | 15.5 | 4.0 | 2.2                     | 2.2  | 4.9  | 1.9 | -2.8  | 6.4  | 15.5 | 4.7 |
| OLYP-D3(BJ)  | -8.9                        | 8.9  | 13.9 | 3.7 | 0.6                     | 2.1  | 4.1  | 1.4 | -5.3  | 6.3  | 13.9 | 4.5 |
| OPBE-D3(BJ)  | -12.6                       | 12.6 | 20.2 | 5.0 | -8.2                    | 8.2  | 13.5 | 4.0 | -11.0 | 11.0 | 20.2 | 5.1 |
| B3LYP-D3(BJ) | -2.0                        | 2.5  | 4.3  | 1.3 | 5.1                     | 5.1  | 6.2  | 1.0 | 0.7   | 3.5  | 6.2  | 1.7 |
| PBE0-D3(BJ)  | -4.9                        | 4.9  | 9.2  | 2.8 | -4.6                    | 4.6  | 7.4  | 1.9 | -4.8  | 4.8  | 9.2  | 2.5 |
| M06-2X-D3    | -0.1                        | 1.6  | 2.7  | 0.8 | -0.9                    | 0.9  | 1.5  | 0.4 | -0.4  | 1.3  | 2.7  | 0.7 |

**Table S37.** Reaction barriers and reaction energies (kcal mol<sup>-1</sup>) for the various pericyclic reactions, computed with XC/QZ4P//BP86/QZ4P.

| XC              | Diels-Alder Reaction           |                         | 1,3-dipolar Cycloaddition |                         | Electrocyclic Rearrangement |                         | Sigmatropic Rearrangement |                         | Double Group Transfer |                         |  |
|-----------------|--------------------------------|-------------------------|---------------------------|-------------------------|-----------------------------|-------------------------|---------------------------|-------------------------|-----------------------|-------------------------|--|
|                 | $\Delta E^\ddagger$            | $\Delta E_{\text{rxn}}$ | $\Delta E^\ddagger$       | $\Delta E_{\text{rxn}}$ | $\Delta E^\ddagger$         | $\Delta E_{\text{rxn}}$ | $\Delta E^\ddagger$       | $\Delta E_{\text{rxn}}$ | $\Delta E^\ddagger$   | $\Delta E_{\text{rxn}}$ |  |
|                 | <i>LDA</i>                     |                         |                           |                         |                             |                         |                           |                         |                       |                         |  |
| VWN             | 0.8                            | -65.1                   | 3.2                       | -42.3                   | 36.3                        | 2.4                     | 21.9                      | 0.0                     | 22.1                  | 0.0                     |  |
|                 | <i>GGAs</i>                    |                         |                           |                         |                             |                         |                           |                         |                       |                         |  |
| BP86            | 15.0                           | -42.4                   | 15.4                      | -20.8                   | 39.6                        | 8.3                     | 28.2                      | 0.0                     | 38.1                  | 0.0                     |  |
| BLYP            | 21.0                           | -30.2                   | 19.2                      | -11.1                   | 42.7                        | 13.8                    | 31.9                      | 0.0                     | 45.2                  | 0.0                     |  |
| BEE             | 16.1                           | -43.1                   | 17.2                      | -20.0                   | 38.9                        | 6.3                     | 28.0                      | 0.0                     | 38.4                  | 0.0                     |  |
| PW91            | 12.4                           | -46.2                   | 13.3                      | -24.1                   | 39.3                        | 7.4                     | 27.8                      | 0.0                     | 35.7                  | 0.0                     |  |
| PBE             | 12.8                           | -46.3                   | 13.9                      | -23.7                   | 38.9                        | 6.7                     | 27.6                      | 0.0                     | 35.8                  | 0.0                     |  |
| PBEsol          | 6.7                            | -56.8                   | 8.8                       | -33.7                   | 36.7                        | 3.2                     | 24.0                      | 0.0                     | 28.4                  | 0.0                     |  |
| RPBE            | 18.8                           | -38.1                   | 19.2                      | -15.8                   | 40.0                        | 8.2                     | 29.8                      | 0.0                     | 41.7                  | 0.0                     |  |
| revPBE          | 18.5                           | -39.0                   | 19.0                      | -16.4                   | 39.7                        | 7.8                     | 29.4                      | 0.0                     | 41.2                  | 0.0                     |  |
| mPBE            | 14.4                           | -44.0                   | 15.3                      | -21.6                   | 39.3                        | 7.2                     | 28.2                      | 0.0                     | 37.4                  | 0.0                     |  |
| mPW             | 15.5                           | -41.9                   | 16.1                      | -19.8                   | 39.9                        | 8.3                     | 28.8                      | 0.0                     | 38.9                  | 0.0                     |  |
| HTBS            | 13.9                           | -47.1                   | 15.5                      | -24.1                   | 37.5                        | 4.7                     | 26.1                      | 0.0                     | 35.5                  | 0.0                     |  |
| OLYP            | 24.0                           | -36.0                   | 23.9                      | -13.6                   | 40.4                        | 7.1                     | 30.8                      | 0.0                     | 45.4                  | 0.0                     |  |
| OPBE            | 19.4                           | -48.5                   | 21.9                      | -22.5                   | 36.7                        | 0.1                     | 26.9                      | 0.0                     | 39.0                  | 0.0                     |  |
| XLYP            | 21.2                           | -28.9                   | 19.3                      | -10.1                   | 43.2                        | 14.7                    | 32.5                      | 0.0                     | 45.9                  | 0.0                     |  |
|                 | <i>Meta-GGAs</i>               |                         |                           |                         |                             |                         |                           |                         |                       |                         |  |
| M06-L           | 16.8                           | -45.9                   | 19.8                      | -17.2                   | 43.6                        | 5.9                     | 34.1                      | 0.0                     | 46.0                  | 0.0                     |  |
| MVS             | 12.8                           | -54.2                   | 18.6                      | -24.6                   | 43.7                        | 5.8                     | 28.2                      | 0.0                     | 36.7                  | 0.0                     |  |
| TPSS            | 15.5                           | -40.3                   | 15.9                      | -19.8                   | 40.2                        | 7.7                     | 30.9                      | 0.0                     | 42.9                  | 0.0                     |  |
| revTPSS         | 14.9                           | -42.3                   | 15.0                      | -22.8                   | 39.6                        | 6.3                     | 31.5                      | 0.0                     | 44.8                  | 0.0                     |  |
|                 | <i>Hybrids</i>                 |                         |                           |                         |                             |                         |                           |                         |                       |                         |  |
| B3LYP           | 22.6                           | -37.5                   | 21.7                      | -18.9                   | 44.8                        | 11.8                    | 35.1                      | 0.0                     | 49.6                  | 0.0                     |  |
| B3LYP*          | 20.6                           | -38.3                   | 19.9                      | -19.2                   | 43.8                        | 11.4                    | 33.5                      | 0.0                     | 46.7                  | 0.0                     |  |
| B1LYP           | 24.0                           | -37.2                   | 23.0                      | -19.2                   | 45.7                        | 12.1                    | 36.4                      | 0.0                     | 51.9                  | 0.0                     |  |
| B1PW91          | 19.6                           | -48.5                   | 21.2                      | -26.9                   | 42.4                        | 5.7                     | 33.0                      | 0.0                     | 46.2                  | 0.0                     |  |
| BHandH          | 13.0                           | -66.3                   | 14.9                      | -48.1                   | 44.1                        | 3.5                     | 34.2                      | 0.0                     | 42.6                  | 0.0                     |  |
| BHandHLYP       | 26.8                           | -44.4                   | 26.5                      | -27.8                   | 48.6                        | 10.3                    | 41.2                      | 0.0                     | 58.5                  | 0.0                     |  |
| KMLYP           | 19.3                           | -60.2                   | 21.0                      | -42.1                   | 46.4                        | 5.0                     | 38.0                      | 0.0                     | 50.3                  | 0.0                     |  |
| O3LYP           | -1.7                           | -75.5                   | 1.4                       | -53.0                   | 37.2                        | 0.2                     | 22.9                      | 0.0                     | 21.8                  | 0.0                     |  |
| OPBE0           | 21.4                           | -54.3                   | 24.4                      | -30.0                   | 40.0                        | -0.3                    | 31.6                      | 0.0                     | 45.3                  | 0.0                     |  |
| PBE0            | 16.6                           | -52.6                   | 18.4                      | -30.9                   | 41.8                        | 4.8                     | 32.2                      | 0.0                     | 43.1                  | 0.0                     |  |
| mPW1PW          | 18.7                           | -48.9                   | 20.2                      | -27.2                   | 42.6                        | 6.2                     | 33.2                      | 0.0                     | 45.7                  | 0.0                     |  |
| mPW1K           | 20.9                           | -54.0                   | 22.9                      | -33.5                   | 44.6                        | 4.7                     | 36.5                      | 0.0                     | 50.4                  | 0.0                     |  |
| S12H            | 16.4                           | -53.2                   | 19.4                      | -29.2                   | 42.7                        | 4.5                     | 34.1                      | 0.0                     | 44.2                  | 0.0                     |  |
| X3LYP           | 21.8                           | -39.1                   | 21.1                      | -20.7                   | 44.9                        | 11.6                    | 35.2                      | 0.0                     | 49.2                  | 0.0                     |  |
|                 | <i>Meta-Hybrids</i>            |                         |                           |                         |                             |                         |                           |                         |                       |                         |  |
| M06             | 19.3                           | -47.6                   | 22.4                      | -22.7                   | 43.4                        | 7.0                     | 34.9                      | 0.0                     | 48.4                  | 0.0                     |  |
| M06-2X          | 17.8                           | -48.7                   | 21.2                      | -29.6                   | 44.4                        | 7.8                     | 36.4                      | 0.0                     | 49.0                  | 0.0                     |  |
| M06-HF          | 14.0                           | -48.4                   | 18.8                      | -40.4                   | 42.7                        | 9.7                     | 37.3                      | 0.0                     | 50.7                  | 0.0                     |  |
| TPSSH           | 16.9                           | -43.2                   | 17.6                      | -22.8                   | 41.2                        | 6.9                     | 32.5                      | 0.0                     | 45.2                  | 0.0                     |  |
|                 | <i>Double-Hybrids</i>          |                         |                           |                         |                             |                         |                           |                         |                       |                         |  |
| B2K-PLYP        | 17.7                           | -49.1                   | 17.7                      | -25.2                   | 43.9                        | 7.9                     | 35.3                      | 0.0                     | 49.2                  | 0.0                     |  |
| B2T-PLYP        | 18.7                           | -45.8                   | 18.4                      | -22.7                   | 44.0                        | 9.1                     | 35.1                      | 0.0                     | 49.3                  | 0.0                     |  |
| B2-PLYP         | 18.8                           | -43.7                   | 18.2                      | -20.8                   | 43.7                        | 9.7                     | 34.5                      | 0.0                     | 48.5                  | 0.0                     |  |
| LS1-TPSS        | 13.4                           | -56.5                   | 15.1                      | -29.4                   | 41.6                        | 4.1                     | 33.2                      | 0.0                     | 45.5                  | 0.0                     |  |
| mPW2K-PLYP      | 17.3                           | -49.2                   | 17.3                      | -25.5                   | 44.0                        | 8.1                     | 35.4                      | 0.0                     | 49.0                  | 0.0                     |  |
| mPW2-PLYP       | 19.2                           | -44.7                   | 18.6                      | -22.7                   | 44.5                        | 9.9                     | 35.6                      | 0.0                     | 49.7                  | 0.0                     |  |
| PBE0-DH         | 16.9                           | -56.5                   | 18.9                      | -33.6                   | 42.7                        | 3.8                     | 34.0                      | 0.0                     | 46.1                  | 0.0                     |  |
| revDSD-BLYP     | 16.8                           | -49.2                   | 17.0                      | -25.2                   | 44.1                        | 8.5                     | 36.3                      | 0.0                     | 49.7                  | 0.0                     |  |
| revDSD-PBE      | 16.2                           | -52.0                   | 17.0                      | -26.8                   | 42.9                        | 6.2                     | 35.5                      | 0.0                     | 47.8                  | 0.0                     |  |
| revDSD-PBEP86   | 18.4                           | -49.3                   | 18.7                      | -24.6                   | 43.7                        | 7.1                     | 36.5                      | 0.0                     | 50.0                  | 0.0                     |  |
|                 | <i>Range-Separated Hybrids</i> |                         |                           |                         |                             |                         |                           |                         |                       |                         |  |
| CAM-B3LYP       | 23.5                           | -45.3                   | 22.1                      | -27.8                   | 45.9                        | 9.2                     | 37.2                      | 0.0                     | 51.7                  | 0.0                     |  |
| CAMY-B3LYP      | 21.5                           | -44.4                   | 20.7                      | -26.4                   | 45.3                        | 9.9                     | 36.1                      | 0.0                     | 49.8                  | 0.0                     |  |
| $\omega$ B97    | 23.1                           | -56.1                   | 22.7                      | -35.2                   | 46.3                        | 3.1                     | 40.2                      | 0.0                     | 53.2                  | 0.0                     |  |
| $\omega$ B97X   | 22.6                           | -56.1                   | 22.3                      | -32.3                   | 45.8                        | 5.4                     | 38.7                      | 0.0                     | 51.8                  | 0.0                     |  |
| $\omega$ B97X-D | 23.0                           | -47.6                   | 23.0                      | -28.0                   | 44.6                        | 6.3                     | 36.4                      | 0.0                     | 50.3                  | 0.0                     |  |

**Table S37** (continued).

| XC           | Diels-Alder Reaction        |                         | 1,3-dipolar Cycloaddition |                         | Electrocyclic Rearrangement |                         | Sigmatropic Rearrangement |                         | Double Group Transfer |                         |
|--------------|-----------------------------|-------------------------|---------------------------|-------------------------|-----------------------------|-------------------------|---------------------------|-------------------------|-----------------------|-------------------------|
|              | $\Delta E^\ddagger$         | $\Delta E_{\text{rxn}}$ | $\Delta E^\ddagger$       | $\Delta E_{\text{rxn}}$ | $\Delta E^\ddagger$         | $\Delta E_{\text{rxn}}$ | $\Delta E^\ddagger$       | $\Delta E_{\text{rxn}}$ | $\Delta E^\ddagger$   | $\Delta E_{\text{rxn}}$ |
|              | <i>Dispersion-Corrected</i> |                         |                           |                         |                             |                         |                           |                         |                       |                         |
| BP86-D3(BJ)  | 8.8                         | -47.2                   | 11.2                      | -24.7                   | 39.4                        | 8.4                     | 27.7                      | 0.0                     | 34.7                  | 0.0                     |
| BLYP-D3(BJ)  | 13.1                        | -36.5                   | 13.8                      | -16.2                   | 42.3                        | 13.9                    | 31.0                      | 0.0                     | 40.8                  | 0.0                     |
| PBE-D3(BJ)   | 8.9                         | -49.4                   | 11.2                      | -26.3                   | 38.8                        | 6.8                     | 27.2                      | 0.0                     | 33.5                  | 0.0                     |
| OLYP-D3(BJ)  | 7.7                         | -50.2                   | 12.2                      | -25.9                   | 39.0                        | 6.9                     | 27.5                      | 0.0                     | 36.1                  | 0.0                     |
| OPBE-D3(BJ)  | 3.3                         | -62.3                   | 10.6                      | -34.1                   | 35.5                        | -0.1                    | 24.1                      | 0.0                     | 29.9                  | 0.0                     |
| B3LYP-D3(BJ) | 16.1                        | -42.7                   | 17.3                      | -23.1                   | 44.5                        | 11.9                    | 34.4                      | 0.0                     | 46.0                  | 0.0                     |
| PBE0-D3(BJ)  | 13.1                        | -55.3                   | 16.0                      | -33.1                   | 41.7                        | 4.9                     | 31.9                      | 0.0                     | 41.1                  | 0.0                     |
| M06-2X-D3    | 17.7                        | -48.8                   | 21.1                      | -29.7                   | 44.4                        | 7.8                     | 36.4                      | 0.0                     | 48.9                  | 0.0                     |

**Table S38.** Errors in reaction barriers and reaction energies (kcal mol<sup>-1</sup>) for the various pericyclic reactions, computed with XC/QZ4P//BP86/QZ4P, compared to CCSDT(Q)/CBS//CCSD(T)/cc-pVTZ.

| XC              | Diels-Alder Reaction           |                         | 1,3-dipolar Cycloaddition |                         | Electrocyclic Rearrangement |                         | Sigmatropic Rearrangement |                         | Double Group Transfer |                         |  |
|-----------------|--------------------------------|-------------------------|---------------------------|-------------------------|-----------------------------|-------------------------|---------------------------|-------------------------|-----------------------|-------------------------|--|
|                 | $\Delta E^\ddagger$            | $\Delta E_{\text{rxn}}$ | $\Delta E^\ddagger$       | $\Delta E_{\text{rxn}}$ | $\Delta E^\ddagger$         | $\Delta E_{\text{rxn}}$ | $\Delta E^\ddagger$       | $\Delta E_{\text{rxn}}$ | $\Delta E^\ddagger$   | $\Delta E_{\text{rxn}}$ |  |
|                 | <i>LDA</i>                     |                         |                           |                         |                             |                         |                           |                         |                       |                         |  |
| VWN             | -18.8                          | -17.5                   | -15.1                     | -13.4                   | -7.1                        | -6.1                    | -14.9                     | 0.0                     | -28.1                 | 0.0                     |  |
|                 | <i>GGAs</i>                    |                         |                           |                         |                             |                         |                           |                         |                       |                         |  |
| BP86            | -4.6                           | 5.3                     | -2.9                      | 8.1                     | -3.8                        | -0.1                    | -8.6                      | 0.0                     | -12.1                 | 0.0                     |  |
| BLYP            | 1.4                            | 17.5                    | 0.9                       | 17.8                    | -0.7                        | 5.4                     | -4.9                      | 0.0                     | -5.0                  | 0.0                     |  |
| BEE             | -3.5                           | 4.6                     | -1.1                      | 8.9                     | -4.5                        | -2.2                    | -8.8                      | 0.0                     | -11.8                 | 0.0                     |  |
| PW91            | -7.2                           | 1.5                     | -5.0                      | 4.8                     | -4.1                        | -1.1                    | -9.0                      | 0.0                     | -14.5                 | 0.0                     |  |
| PBE             | -6.8                           | 1.4                     | -4.4                      | 5.2                     | -4.5                        | -1.8                    | -9.2                      | 0.0                     | -14.4                 | 0.0                     |  |
| PBESol          | -12.9                          | -9.2                    | -9.5                      | -4.8                    | -6.7                        | -5.3                    | -12.8                     | 0.0                     | -21.8                 | 0.0                     |  |
| RPBE            | -0.8                           | 9.6                     | 0.9                       | 13.1                    | -3.4                        | -0.3                    | -7.0                      | 0.0                     | -8.5                  | 0.0                     |  |
| revPBE          | -1.1                           | 8.7                     | 0.7                       | 12.5                    | -3.7                        | -0.6                    | -7.4                      | 0.0                     | -9.0                  | 0.0                     |  |
| mPBE            | -5.2                           | 3.7                     | -3.0                      | 7.3                     | -4.1                        | -1.3                    | -8.6                      | 0.0                     | -12.8                 | 0.0                     |  |
| mPW             | -4.1                           | 5.8                     | -2.2                      | 9.1                     | -3.5                        | -0.1                    | -8.0                      | 0.0                     | -11.3                 | 0.0                     |  |
| HTBS            | -5.7                           | 0.5                     | -2.8                      | 4.8                     | -5.9                        | -3.8                    | -10.7                     | 0.0                     | -14.7                 | 0.0                     |  |
| OLYP            | 4.4                            | 11.7                    | 5.6                       | 15.3                    | -3.0                        | -1.4                    | -6.0                      | 0.0                     | -4.8                  | 0.0                     |  |
| OPBE            | -0.2                           | -0.9                    | 3.6                       | 6.4                     | -6.7                        | -8.4                    | -9.9                      | 0.0                     | -11.2                 | 0.0                     |  |
| XLYP            | 1.6                            | 18.8                    | 1.0                       | 18.8                    | -0.2                        | 6.3                     | -4.3                      | 0.0                     | -4.3                  | 0.0                     |  |
|                 | <i>Meta-GGAs</i>               |                         |                           |                         |                             |                         |                           |                         |                       |                         |  |
| M06-L           | -2.8                           | 1.8                     | 1.5                       | 11.7                    | 0.2                         | -2.6                    | -2.7                      | 0.0                     | -4.2                  | 0.0                     |  |
| MVS             | -6.8                           | -6.6                    | 0.3                       | 4.3                     | 0.3                         | -2.7                    | -8.6                      | 0.0                     | -13.5                 | 0.0                     |  |
| TPSS            | -4.1                           | 7.4                     | -2.4                      | 9.1                     | -3.2                        | -0.7                    | -5.9                      | 0.0                     | -7.3                  | 0.0                     |  |
| revTPSS         | -4.7                           | 5.4                     | -3.3                      | 6.1                     | -3.8                        | -2.2                    | -5.3                      | 0.0                     | -5.4                  | 0.0                     |  |
|                 | <i>Hybrids</i>                 |                         |                           |                         |                             |                         |                           |                         |                       |                         |  |
| B3LYP           | 3.0                            | 10.2                    | 3.4                       | 10.0                    | 1.4                         | 3.4                     | -1.7                      | 0.0                     | -0.6                  | 0.0                     |  |
| B3LYP*          | 1.0                            | 9.4                     | 1.6                       | 9.7                     | 0.4                         | 3.0                     | -3.3                      | 0.0                     | -3.5                  | 0.0                     |  |
| B1LYP           | 4.4                            | 10.5                    | 4.7                       | 9.7                     | 2.3                         | 3.7                     | -0.4                      | 0.0                     | 1.7                   | 0.0                     |  |
| B1PW91          | 0.0                            | -0.9                    | 2.9                       | 2.0                     | -1.0                        | -2.8                    | -3.8                      | 0.0                     | -4.0                  | 0.0                     |  |
| BHandH          | -6.6                           | -18.7                   | -3.4                      | -19.2                   | 0.7                         | -5.0                    | -2.6                      | 0.0                     | -7.6                  | 0.0                     |  |
| BHandHLYP       | 7.2                            | 3.3                     | 8.2                       | 1.1                     | 5.2                         | 1.9                     | 4.4                       | 0.0                     | 8.3                   | 0.0                     |  |
| KMLYP           | -0.3                           | -12.6                   | 2.7                       | -13.2                   | 3.0                         | -3.5                    | 1.2                       | 0.0                     | 0.1                   | 0.0                     |  |
| O3LYP           | -21.3                          | -27.9                   | -16.9                     | -24.1                   | -6.2                        | -8.3                    | -13.9                     | 0.0                     | -28.4                 | 0.0                     |  |
| OPBE0           | 1.8                            | -6.7                    | 6.1                       | -1.1                    | -3.4                        | -8.8                    | -5.2                      | 0.0                     | -4.9                  | 0.0                     |  |
| PBE0            | -3.0                           | -5.0                    | 0.1                       | -2.0                    | -1.6                        | -3.7                    | -4.6                      | 0.0                     | -7.1                  | 0.0                     |  |
| mPW1PW          | -0.9                           | -1.3                    | 1.9                       | 1.7                     | -0.8                        | -2.3                    | -3.6                      | 0.0                     | -4.5                  | 0.0                     |  |
| mPW1K           | 1.3                            | -6.4                    | 4.6                       | -4.6                    | 1.2                         | -3.8                    | -0.3                      | 0.0                     | 0.2                   | 0.0                     |  |
| S12H            | -3.2                           | -5.6                    | 1.1                       | -0.3                    | -0.7                        | -4.0                    | -2.7                      | 0.0                     | -6.0                  | 0.0                     |  |
| X3LYP           | 2.2                            | 8.6                     | 2.8                       | 8.2                     | 1.5                         | 3.2                     | -1.6                      | 0.0                     | -1.0                  | 0.0                     |  |
|                 | <i>Meta-Hybrids</i>            |                         |                           |                         |                             |                         |                           |                         |                       |                         |  |
| M06             | -0.3                           | 0.0                     | 4.1                       | 6.2                     | 0.0                         | -1.5                    | -1.9                      | 0.0                     | -1.8                  | 0.0                     |  |
| M06-2X          | -1.8                           | -1.1                    | 2.9                       | -0.7                    | 1.0                         | -0.6                    | -0.4                      | 0.0                     | -1.2                  | 0.0                     |  |
| M06-HF          | -5.6                           | -0.8                    | 0.5                       | -11.5                   | -0.7                        | 1.3                     | 0.5                       | 0.0                     | 0.5                   | 0.0                     |  |
| TPSSH           | -2.7                           | 4.5                     | -0.7                      | 6.1                     | -2.2                        | -1.6                    | -4.3                      | 0.0                     | -5.0                  | 0.0                     |  |
|                 | <i>Double-Hybrids</i>          |                         |                           |                         |                             |                         |                           |                         |                       |                         |  |
| B2K-PLYP        | -1.9                           | -1.5                    | -0.6                      | 3.7                     | 0.5                         | -0.5                    | -1.5                      | 0.0                     | -1.0                  | 0.0                     |  |
| B2T-PLYP        | -0.9                           | 1.9                     | 0.1                       | 6.2                     | 0.6                         | 0.7                     | -1.7                      | 0.0                     | -0.9                  | 0.0                     |  |
| B2-PLYP         | -0.8                           | 4.0                     | -0.1                      | 8.1                     | 0.3                         | 1.3                     | -2.3                      | 0.0                     | -1.7                  | 0.0                     |  |
| LS1-TPSS        | -6.2                           | -8.9                    | -3.2                      | -0.5                    | -1.8                        | -4.4                    | -3.6                      | 0.0                     | -4.7                  | 0.0                     |  |
| mPW2K-PLYP      | -2.3                           | -1.6                    | -1.0                      | 3.4                     | 0.6                         | -0.4                    | -1.4                      | 0.0                     | -1.2                  | 0.0                     |  |
| mPW2-PLYP       | -0.4                           | 3.0                     | 0.3                       | 6.2                     | 1.1                         | 1.5                     | -1.2                      | 0.0                     | -0.5                  | 0.0                     |  |
| PBE0-DH         | -2.7                           | -8.9                    | 0.6                       | -4.7                    | -0.7                        | -4.7                    | -2.8                      | 0.0                     | -4.1                  | 0.0                     |  |
| revDSD-BLYP     | -2.8                           | -1.6                    | -1.3                      | 3.7                     | 0.7                         | 0.1                     | -0.5                      | 0.0                     | -0.5                  | 0.0                     |  |
| revDSD-PBE      | -3.4                           | -4.4                    | -1.3                      | 2.1                     | -0.5                        | -2.3                    | -1.3                      | 0.0                     | -2.4                  | 0.0                     |  |
| revDSD-PBEP86   | -1.2                           | -1.7                    | 0.4                       | 4.3                     | 0.3                         | -1.4                    | -0.3                      | 0.0                     | -0.2                  | 0.0                     |  |
|                 | <i>Range-Separated Hybrids</i> |                         |                           |                         |                             |                         |                           |                         |                       |                         |  |
| CAM-B3LYP       | 3.9                            | 2.4                     | 3.8                       | 1.1                     | 2.5                         | 0.8                     | 0.4                       | 0.0                     | 1.5                   | 0.0                     |  |
| CAMY-B3LYP      | 1.9                            | 3.3                     | 2.4                       | 2.5                     | 1.9                         | 1.5                     | -0.7                      | 0.0                     | -0.4                  | 0.0                     |  |
| $\omega$ B97    | 3.5                            | -8.5                    | 4.4                       | -6.3                    | 2.9                         | -5.4                    | 3.4                       | 0.0                     | 3.0                   | 0.0                     |  |
| $\omega$ B97X   | 3.0                            | -8.5                    | 4.0                       | -3.4                    | 2.4                         | -3.1                    | 1.9                       | 0.0                     | 1.6                   | 0.0                     |  |
| $\omega$ B97X-D | 3.4                            | 0.0                     | 4.7                       | 0.9                     | 1.2                         | -2.2                    | -0.4                      | 0.0                     | 0.1                   | 0.0                     |  |



**Table S38** (continued).

| XC           | Diels-Alder<br>Reaction     |                         | 1,3-dipolar<br>Cycloaddition |                         | Electrocyclic<br>Rearrangement |                         | Sigmatropic<br>Rearrangement |                         | Double Group<br>Transfer |                         |
|--------------|-----------------------------|-------------------------|------------------------------|-------------------------|--------------------------------|-------------------------|------------------------------|-------------------------|--------------------------|-------------------------|
|              | $\Delta E^\ddagger$         | $\Delta E_{\text{rxn}}$ | $\Delta E^\ddagger$          | $\Delta E_{\text{rxn}}$ | $\Delta E^\ddagger$            | $\Delta E_{\text{rxn}}$ | $\Delta E^\ddagger$          | $\Delta E_{\text{rxn}}$ | $\Delta E^\ddagger$      | $\Delta E_{\text{rxn}}$ |
|              | <i>Dispersion-Corrected</i> |                         |                              |                         |                                |                         |                              |                         |                          |                         |
| BP86-D3(BJ)  | -10.8                       | 0.4                     | -7.1                         | 4.2                     | -4.0                           | 0.0                     | -9.1                         | 0.0                     | -15.5                    | 0.0                     |
| BLYP-D3(BJ)  | -6.5                        | 11.2                    | -4.5                         | 12.7                    | -1.1                           | 5.5                     | -5.8                         | 0.0                     | -9.4                     | 0.0                     |
| PBE-D3(BJ)   | -10.7                       | -1.8                    | -7.1                         | 2.6                     | -4.6                           | -1.7                    | -9.6                         | 0.0                     | -16.7                    | 0.0                     |
| OLYP-D3(BJ)  | -11.9                       | -2.6                    | -6.1                         | 3.0                     | -4.4                           | -1.6                    | -9.3                         | 0.0                     | -14.1                    | 0.0                     |
| OPBE-D3(BJ)  | -16.3                       | -14.7                   | -7.7                         | -5.2                    | -7.9                           | -8.6                    | -12.7                        | 0.0                     | -20.3                    | 0.0                     |
| B3LYP-D3(BJ) | -3.5                        | 5.0                     | -1.0                         | 5.8                     | 1.1                            | 3.5                     | -2.4                         | 0.0                     | -4.2                     | 0.0                     |
| PBE0-D3(BJ)  | -6.5                        | -7.7                    | -2.3                         | -4.2                    | -1.7                           | -3.6                    | -4.9                         | 0.0                     | -9.1                     | 0.0                     |
| M06-2X-D3    | -1.9                        | -1.2                    | 2.8                          | -0.8                    | 1.0                            | -0.6                    | -0.4                         | 0.0                     | -1.3                     | 0.0                     |

**Table S39.** Mean error (ME), mean absolute error (MAE), maximum unsigned error (MUE) and standard deviation (SD) of reaction barriers and energies (kcal mol<sup>-1</sup>) for the various pericyclic reactions, computed with XC/QZ4P//BP86/QZ4P compared to CCSDT(Q)/CBS//CCSD(T)/cc-pVTZ.

| XC              | $\Delta E^\ddagger$            |      |      |     | $\Delta E_{\text{rxn}}$ |      |      |     | Total |      |      |     |
|-----------------|--------------------------------|------|------|-----|-------------------------|------|------|-----|-------|------|------|-----|
|                 | ME                             | MAE  | MUE  | SD  | ME                      | MAE  | MUE  | SD  | ME    | MAE  | MUE  | SD  |
|                 | <i>LDA</i>                     |      |      |     |                         |      |      |     |       |      |      |     |
| VWN             | -16.8                          | 16.8 | 28.1 | 6.8 | -12.3                   | 12.3 | 17.5 | 4.7 | -15.1 | 15.1 | 28.1 | 6.5 |
|                 | <i>GGAs</i>                    |      |      |     |                         |      |      |     |       |      |      |     |
| BP86            | -6.4                           | 6.4  | 12.1 | 3.5 | 4.4                     | 4.5  | 8.1  | 3.3 | -2.4  | 5.7  | 12.1 | 3.5 |
| BLYP            | -1.7                           | 2.6  | 5.0  | 1.9 | 13.5                    | 13.5 | 17.8 | 5.8 | 4.0   | 6.7  | 17.8 | 6.5 |
| BEE             | -5.9                           | 5.9  | 11.8 | 3.9 | 3.8                     | 5.2  | 8.9  | 2.8 | -2.3  | 5.7  | 11.8 | 3.5 |
| PW91            | -8.0                           | 8.0  | 14.5 | 3.7 | 1.7                     | 2.4  | 4.8  | 1.7 | -4.3  | 5.9  | 14.5 | 4.1 |
| PBE             | -7.9                           | 7.9  | 14.4 | 3.7 | 1.6                     | 2.8  | 5.2  | 1.7 | -4.3  | 5.9  | 14.4 | 4.0 |
| PBEsol          | -12.7                          | 12.7 | 21.8 | 5.1 | -6.4                    | 6.4  | 9.2  | 1.9 | -10.4 | 10.4 | 21.8 | 5.2 |
| RPBE            | -3.8                           | 4.1  | 8.5  | 3.2 | 7.5                     | 7.6  | 13.1 | 5.4 | 0.4   | 5.4  | 13.1 | 4.5 |
| revPBE          | -4.1                           | 4.4  | 9.0  | 3.3 | 6.8                     | 7.3  | 12.5 | 4.9 | 0.0   | 5.5  | 12.5 | 4.2 |
| mPBE            | -6.7                           | 6.7  | 12.8 | 3.6 | 3.2                     | 4.1  | 7.3  | 2.5 | -3.0  | 5.7  | 12.8 | 3.5 |
| mPW             | -5.8                           | 5.8  | 11.3 | 3.4 | 4.9                     | 5.0  | 9.1  | 3.7 | -1.8  | 5.5  | 11.3 | 3.5 |
| HTBS            | -8.0                           | 8.0  | 14.7 | 4.2 | 0.5                     | 3.0  | 4.8  | 1.8 | -4.8  | 6.1  | 14.7 | 4.3 |
| OLYP            | -0.8                           | 4.8  | 6.0  | 1.0 | 8.5                     | 9.4  | 15.3 | 5.9 | 2.7   | 6.5  | 15.3 | 4.3 |
| OPBE            | -4.9                           | 6.3  | 11.2 | 4.1 | -0.9                    | 5.2  | 8.4  | 3.2 | -3.4  | 5.9  | 11.2 | 3.8 |
| XLYP            | -1.2                           | 2.3  | 4.3  | 1.7 | 14.6                    | 14.6 | 18.8 | 5.9 | 4.7   | 6.9  | 18.8 | 7.1 |
|                 | <i>Meta-GGAs</i>               |      |      |     |                         |      |      |     |       |      |      |     |
| M06-L           | -1.6                           | 2.3  | 4.2  | 1.4 | 3.6                     | 5.3  | 11.7 | 4.5 | 0.4   | 3.4  | 11.7 | 3.3 |
| MVS             | -5.7                           | 5.9  | 13.5 | 5.1 | -1.6                    | 4.5  | 6.6  | 1.6 | -4.2  | 5.4  | 13.5 | 4.2 |
| TPSS            | -4.6                           | 4.6  | 7.3  | 1.8 | 5.2                     | 5.7  | 9.1  | 3.6 | -0.9  | 5.0  | 9.1  | 2.7 |
| revTPSS         | -4.5                           | 4.5  | 5.4  | 0.8 | 3.1                     | 4.5  | 6.1  | 1.7 | -1.7  | 4.5  | 6.1  | 1.2 |
|                 | <i>Hybrids</i>                 |      |      |     |                         |      |      |     |       |      |      |     |
| B3LYP           | 1.1                            | 2.0  | 3.4  | 1.0 | 7.8                     | 7.8  | 10.2 | 3.2 | 3.6   | 4.2  | 10.2 | 3.5 |
| B3LYP*          | -0.8                           | 2.0  | 3.5  | 1.2 | 7.3                     | 7.3  | 9.7  | 3.1 | 2.3   | 4.0  | 9.7  | 3.4 |
| B1LYP           | 2.5                            | 2.7  | 4.7  | 1.7 | 7.9                     | 7.9  | 10.5 | 3.0 | 4.6   | 4.7  | 10.5 | 3.4 |
| B1PW91          | -1.2                           | 2.4  | 4.0  | 1.6 | -0.5                    | 1.9  | 2.8  | 0.8 | -0.9  | 2.2  | 4.0  | 1.3 |
| BHandH          | -3.9                           | 4.2  | 7.6  | 2.6 | -14.3                   | 14.3 | 19.2 | 6.6 | -7.8  | 8.0  | 19.2 | 6.7 |
| BHandHLYP       | 6.7                            | 6.7  | 8.3  | 1.6 | 2.1                     | 2.1  | 3.3  | 0.9 | 4.9   | 4.9  | 8.3  | 2.6 |
| KMLYP           | 1.3                            | 1.4  | 3.0  | 1.2 | -9.7                    | 9.7  | 13.2 | 4.5 | -2.8  | 4.6  | 13.2 | 5.0 |
| O3LYP           | -17.3                          | 17.3 | 28.4 | 7.4 | -20.1                   | 20.1 | 27.9 | 8.5 | -18.4 | 18.4 | 28.4 | 7.9 |
| OPBE0           | -1.1                           | 4.3  | 6.1  | 1.5 | -5.5                    | 5.5  | 8.8  | 3.2 | -2.8  | 4.8  | 8.8  | 2.4 |
| PBE0            | -3.2                           | 3.3  | 7.1  | 2.4 | -3.5                    | 3.5  | 5.0  | 1.2 | -3.4  | 3.4  | 7.1  | 2.1 |
| mPW1PW          | -1.6                           | 2.3  | 4.5  | 1.5 | -0.6                    | 1.7  | 2.3  | 0.4 | -1.2  | 2.1  | 4.5  | 1.2 |
| mPW1K           | 1.4                            | 1.5  | 4.6  | 1.6 | -4.9                    | 4.9  | 6.4  | 1.1 | -1.0  | 2.8  | 6.4  | 2.2 |
| S12H            | -2.3                           | 2.7  | 6.0  | 1.9 | -3.3                    | 3.3  | 5.6  | 2.2 | -2.7  | 2.9  | 6.0  | 2.0 |
| X3LYP           | 0.8                            | 1.8  | 2.8  | 0.6 | 6.6                     | 6.6  | 8.6  | 2.5 | 3.0   | 3.6  | 8.6  | 2.8 |
|                 | <i>Meta-Hybrids</i>            |      |      |     |                         |      |      |     |       |      |      |     |
| M06             | 0.0                            | 1.6  | 4.1  | 1.5 | 1.6                     | 2.6  | 6.2  | 2.6 | 0.6   | 2.0  | 6.2  | 2.0 |
| M06-2X          | 0.1                            | 1.5  | 2.9  | 0.9 | -0.8                    | 0.8  | 1.1  | 0.2 | -0.2  | 1.2  | 2.9  | 0.7 |
| M06-HF          | -1.0                           | 1.6  | 5.6  | 2.0 | -3.7                    | 4.5  | 11.5 | 5.0 | -2.0  | 2.7  | 11.5 | 3.7 |
| TPSSH           | -3.0                           | 3.0  | 5.0  | 1.5 | 3.0                     | 4.0  | 6.1  | 1.9 | -0.7  | 3.4  | 6.1  | 1.7 |
|                 | <i>Double-Hybrids</i>          |      |      |     |                         |      |      |     |       |      |      |     |
| B2K-PLYP        | -0.9                           | 1.1  | 1.9  | 0.5 | 0.6                     | 1.9  | 3.7  | 1.3 | -0.4  | 1.4  | 3.7  | 1.0 |
| B2T-PLYP        | -0.6                           | 0.8  | 1.7  | 0.5 | 2.9                     | 2.9  | 6.2  | 2.4 | 0.7   | 1.6  | 6.2  | 1.8 |
| B2-PLYP         | -0.9                           | 1.0  | 2.3  | 0.9 | 4.4                     | 4.4  | 8.1  | 2.8 | 1.1   | 2.3  | 8.1  | 2.5 |
| LS1-TPSS        | -3.9                           | 3.9  | 6.2  | 1.5 | -4.6                    | 4.6  | 8.9  | 3.4 | -4.2  | 4.2  | 8.9  | 2.4 |
| mPW2K-PLYP      | -1.1                           | 1.3  | 2.3  | 0.6 | 0.5                     | 1.8  | 3.4  | 1.2 | -0.5  | 1.5  | 3.4  | 0.9 |
| mPW2-PLYP       | -0.1                           | 0.7  | 1.2  | 0.4 | 3.5                     | 3.5  | 6.2  | 2.0 | 1.2   | 1.8  | 6.2  | 1.8 |
| PBE0-DH         | -1.9                           | 2.2  | 4.1  | 1.3 | -6.1                    | 6.1  | 8.9  | 2.0 | -3.5  | 3.6  | 8.9  | 2.5 |
| revDSD-BLYP     | -0.9                           | 1.1  | 2.8  | 0.9 | 0.7                     | 1.8  | 3.7  | 1.5 | -0.3  | 1.4  | 3.7  | 1.2 |
| revDSD-PBE      | -1.8                           | 1.8  | 3.4  | 1.0 | -1.5                    | 2.9  | 4.4  | 1.0 | -1.7  | 2.2  | 4.4  | 1.1 |
| revDSD-PBEP86   | -0.2                           | 0.5  | 1.2  | 0.4 | 0.4                     | 2.4  | 4.3  | 1.3 | 0.0   | 1.2  | 4.3  | 1.3 |
|                 | <i>Range-Separated Hybrids</i> |      |      |     |                         |      |      |     |       |      |      |     |
| CAM-B3LYP       | 2.4                            | 2.4  | 3.9  | 1.4 | 1.4                     | 1.4  | 2.4  | 0.7 | 2.0   | 2.0  | 3.9  | 1.3 |
| CAMY-B3LYP      | 1.0                            | 1.5  | 2.4  | 0.8 | 2.4                     | 2.4  | 3.3  | 0.7 | 1.5   | 1.8  | 3.3  | 0.9 |
| $\omega$ B97    | 3.4                            | 3.4  | 4.4  | 0.5 | -6.7                    | 6.7  | 8.5  | 1.3 | -0.4  | 4.7  | 8.5  | 1.8 |
| $\omega$ B97X   | 2.6                            | 2.6  | 4.0  | 0.9 | -5.0                    | 5.0  | 8.5  | 2.5 | -0.3  | 3.5  | 8.5  | 2.0 |
| $\omega$ B97X-D | 1.8                            | 2.0  | 4.7  | 1.8 | -0.4                    | 1.0  | 2.2  | 0.9 | 1.0   | 1.6  | 4.7  | 1.6 |

**Table S39** (continued).

| XC           | $\Delta E^\ddagger$         |      |      |     | $\Delta E_{\text{rxn}}$ |     |      |     | Total |      |      |     |
|--------------|-----------------------------|------|------|-----|-------------------------|-----|------|-----|-------|------|------|-----|
|              | ME                          | MAE  | MUE  | SD  | ME                      | MAE | MUE  | SD  | ME    | MAE  | MUE  | SD  |
|              | <i>Dispersion-Corrected</i> |      |      |     |                         |     |      |     |       |      |      |     |
| BP86-D3(BJ)  | -9.3                        | 9.3  | 15.5 | 3.8 | 1.5                     | 1.6 | 4.2  | 1.9 | -5.2  | 6.4  | 15.5 | 5.0 |
| BLYP-D3(BJ)  | -5.5                        | 5.5  | 9.4  | 2.7 | 9.8                     | 9.8 | 12.7 | 3.1 | 0.2   | 7.1  | 12.7 | 3.5 |
| PBE-D3(BJ)   | -9.7                        | 9.7  | 16.7 | 4.1 | -0.3                    | 2.0 | 2.6  | 0.4 | -6.2  | 6.8  | 16.7 | 5.0 |
| OLYP-D3(BJ)  | -9.2                        | 9.2  | 14.1 | 3.6 | -0.4                    | 2.4 | 3.0  | 0.6 | -5.9  | 6.6  | 14.1 | 4.4 |
| OPBE-D3(BJ)  | -13.0                       | 13.0 | 20.3 | 4.9 | -9.5                    | 9.5 | 14.7 | 3.9 | -11.7 | 11.7 | 20.3 | 4.8 |
| B3LYP-D3(BJ) | -2.0                        | 2.4  | 4.2  | 1.3 | 4.7                     | 4.7 | 5.8  | 1.0 | 0.5   | 3.3  | 5.8  | 1.6 |
| PBE0-D3(BJ)  | -4.9                        | 4.9  | 9.1  | 2.7 | -5.1                    | 5.1 | 7.7  | 1.8 | -5.0  | 5.0  | 9.1  | 2.4 |
| M06-2X-D3    | 0.0                         | 1.5  | 2.8  | 0.8 | -0.9                    | 0.9 | 1.2  | 0.2 | -0.3  | 1.2  | 2.8  | 0.7 |

**Table S40.** Reaction barriers and reaction energies (kcal mol<sup>-1</sup>) for the various pericyclic reactions, computed with XC/TZ2P//BP86-D3(BJ)/QZ4P.

| XC              | Diels-Alder Reaction           |                         | 1,3-dipolar Cycloaddition |                         | Electrocyclic Rearrangement |                         | Sigmatropic Rearrangement |                         | Double Group Transfer |                         |
|-----------------|--------------------------------|-------------------------|---------------------------|-------------------------|-----------------------------|-------------------------|---------------------------|-------------------------|-----------------------|-------------------------|
|                 | $\Delta E^\ddagger$            | $\Delta E_{\text{rxn}}$ | $\Delta E^\ddagger$       | $\Delta E_{\text{rxn}}$ | $\Delta E^\ddagger$         | $\Delta E_{\text{rxn}}$ | $\Delta E^\ddagger$       | $\Delta E_{\text{rxn}}$ | $\Delta E^\ddagger$   | $\Delta E_{\text{rxn}}$ |
|                 | <i>LDA</i>                     |                         |                           |                         |                             |                         |                           |                         |                       |                         |
| VWN             | 1.0                            | -64.6                   | 3.3                       | -41.5                   | 36.7                        | 3.0                     | 22.2                      | 0.0                     | 22.1                  | 0.0                     |
|                 | <i>GGAs</i>                    |                         |                           |                         |                             |                         |                           |                         |                       |                         |
| BP86            | 15.2                           | -41.6                   | 15.5                      | -20.1                   | 39.9                        | 8.8                     | 28.2                      | 0.0                     | 38.1                  | 0.0                     |
| BLYP            | 21.1                           | -29.6                   | 19.4                      | -10.5                   | 43.0                        | 14.3                    | 31.8                      | 0.0                     | 45.2                  | 0.0                     |
| BEE             | 16.4                           | -42.3                   | 17.4                      | -19.1                   | 39.3                        | 7.1                     | 28.1                      | 0.0                     | 38.5                  | 0.0                     |
| PW91            | 12.6                           | -45.5                   | 13.5                      | -23.3                   | 39.6                        | 8.0                     | 27.9                      | 0.0                     | 35.8                  | 0.0                     |
| PBE             | 13.1                           | -45.6                   | 14.1                      | -22.9                   | 39.3                        | 7.4                     | 27.6                      | 0.0                     | 35.9                  | 0.0                     |
| PBEsol          | 7.0                            | -56.2                   | 9.1                       | -32.8                   | 37.1                        | 3.8                     | 24.1                      | 0.0                     | 28.5                  | 0.0                     |
| RPBE            | 19.0                           | -37.3                   | 19.4                      | -14.9                   | 40.3                        | 8.9                     | 29.8                      | 0.0                     | 41.8                  | 0.0                     |
| revPBE          | 18.7                           | -38.1                   | 19.3                      | -15.5                   | 40.1                        | 8.5                     | 29.4                      | 0.0                     | 41.3                  | 0.0                     |
| mPBE            | 14.6                           | -43.3                   | 15.5                      | -20.8                   | 39.6                        | 7.9                     | 28.3                      | 0.0                     | 37.5                  | 0.0                     |
| mPW             | 15.7                           | -41.2                   | 16.3                      | -19.0                   | 40.2                        | 8.9                     | 28.9                      | 0.0                     | 39.0                  | 0.0                     |
| HTBS            | 14.2                           | -46.4                   | 15.8                      | -23.1                   | 37.9                        | 5.4                     | 26.1                      | 0.0                     | 35.5                  | 0.0                     |
| OLYP            | 24.3                           | -35.1                   | 24.2                      | -12.6                   | 40.9                        | 8.0                     | 30.8                      | 0.0                     | 45.6                  | 0.0                     |
| OPBE            | 19.8                           | -47.4                   | 22.4                      | -21.0                   | 37.4                        | 1.2                     | 27.1                      | 0.0                     | 39.1                  | 0.0                     |
| XLYP            | 21.4                           | -28.3                   | 19.4                      | -9.7                    | 43.4                        | 15.1                    | 32.4                      | 0.0                     | 45.9                  | 0.0                     |
|                 | <i>Meta-GGAs</i>               |                         |                           |                         |                             |                         |                           |                         |                       |                         |
| M06-L           | 16.5                           | -44.9                   | 19.5                      | -16.6                   | 43.9                        | 6.9                     | 34.3                      | 0.0                     | 46.1                  | 0.0                     |
| MVS             | 12.1                           | -54.3                   | 17.9                      | -24.6                   | 43.1                        | 6.5                     | 28.4                      | 0.0                     | 36.8                  | 0.0                     |
| TPSS            | 15.6                           | -39.5                   | 16.1                      | -19.0                   | 40.6                        | 8.5                     | 31.0                      | 0.0                     | 42.9                  | 0.0                     |
| revTPSS         | 14.6                           | -41.7                   | 15.1                      | -22.1                   | 40.0                        | 6.9                     | 31.5                      | 0.0                     | 44.8                  | 0.0                     |
|                 | <i>Hybrids</i>                 |                         |                           |                         |                             |                         |                           |                         |                       |                         |
| B3LYP           | 22.5                           | -37.2                   | 21.6                      | -18.5                   | 45.1                        | 12.2                    | 35.0                      | 0.0                     | 49.5                  | 0.0                     |
| B3LYP*          | 20.6                           | -37.9                   | 19.8                      | -18.8                   | 44.1                        | 11.9                    | 33.4                      | 0.0                     | 46.6                  | 0.0                     |
| B1LYP           | 23.8                           | -37.0                   | 22.8                      | -18.9                   | 46.0                        | 12.5                    | 36.4                      | 0.0                     | 51.8                  | 0.0                     |
| B1PW91          | 19.5                           | -48.2                   | 21.1                      | -26.4                   | 42.8                        | 6.3                     | 33.1                      | 0.0                     | 46.0                  | 0.0                     |
| BHandH          | 12.5                           | -66.6                   | 14.6                      | -47.9                   | 44.5                        | 4.0                     | 34.2                      | 0.0                     | 42.4                  | 0.0                     |
| BHandHLYP       | 26.4                           | -44.6                   | 26.2                      | -27.7                   | 48.9                        | 10.7                    | 41.1                      | 0.0                     | 58.3                  | 0.0                     |
| KMLYP           | 18.7                           | -60.5                   | 20.6                      | -42.0                   | 46.8                        | 5.5                     | 38.0                      | 0.0                     | 50.1                  | 0.0                     |
| O3LYP           | -1.7                           | -75.3                   | 1.4                       | -52.5                   | 37.8                        | 0.8                     | 23.3                      | 0.0                     | 21.8                  | 0.0                     |
| OPBE0           | 21.4                           | -53.7                   | 24.5                      | -28.9                   | 40.7                        | 0.7                     | 31.7                      | 0.0                     | 45.3                  | 0.0                     |
| PBE0            | 16.5                           | -52.3                   | 18.3                      | -30.4                   | 42.3                        | 5.5                     | 32.2                      | 0.0                     | 43.0                  | 0.0                     |
| mPW1PW          | 18.6                           | -48.6                   | 20.1                      | -27.2                   | 43.1                        | 6.8                     | 33.3                      | 0.0                     | 45.6                  | 0.0                     |
| mPW1K           | 20.6                           | -54.0                   | 22.7                      | -33.2                   | 45.0                        | 5.3                     | 36.5                      | 0.0                     | 50.2                  | 0.0                     |
| S12H            | 16.3                           | -52.5                   | 19.2                      | -28.4                   | 43.2                        | 5.4                     | 34.2                      | 0.0                     | 44.3                  | 0.0                     |
| X3LYP           | 21.7                           | -38.8                   | 21.0                      | -20.3                   | 45.2                        | 12.0                    | 35.1                      | 0.0                     | 49.1                  | 0.0                     |
|                 | <i>Meta-Hybrids</i>            |                         |                           |                         |                             |                         |                           |                         |                       |                         |
| M06             | 19.1                           | -47.5                   | 22.1                      | -22.3                   | 43.8                        | 7.4                     | 35.0                      | 0.0                     | 48.4                  | 0.0                     |
| M06-2X          | 17.5                           | -49.0                   | 20.8                      | -29.8                   | 44.7                        | 8.2                     | 36.3                      | 0.0                     | 48.7                  | 0.0                     |
| M06-HF          | 14.4                           | -48.9                   | 19.1                      | -40.9                   | 43.0                        | 9.3                     | 37.3                      | 0.0                     | 50.8                  | 0.0                     |
| TPSSH           | 16.9                           | -42.6                   | 17.7                      | -22.2                   | 41.7                        | 7.6                     | 32.5                      | 0.0                     | 45.2                  | 0.0                     |
|                 | <i>Double-Hybrids</i>          |                         |                           |                         |                             |                         |                           |                         |                       |                         |
| B2K-PLYP        | 18.0                           | -48.8                   | 18.3                      | -25.1                   | 44.8                        | 9.1                     | 36.0                      | 0.0                     | 49.0                  | 0.0                     |
| B2T-PLYP        | 18.9                           | -45.6                   | 18.8                      | -22.6                   | 44.8                        | 10.0                    | 35.6                      | 0.0                     | 49.0                  | 0.0                     |
| B2-PLYP         | 19.0                           | -43.5                   | 18.6                      | -20.7                   | 44.4                        | 10.6                    | 35.0                      | 0.0                     | 48.3                  | 0.0                     |
| LS1-TPSS        | 14.0                           | -56.1                   | 15.8                      | -29.2                   | 42.9                        | 5.6                     | 34.2                      | 0.0                     | 45.4                  | 0.0                     |
| mPW2K-PLYP      | 17.6                           | -49.0                   | 17.9                      | -25.4                   | 44.9                        | 9.2                     | 36.1                      | 0.0                     | 48.8                  | 0.0                     |
| mPW2-PLYP       | 19.3                           | -44.6                   | 18.9                      | -22.6                   | 45.2                        | 10.7                    | 36.0                      | 0.0                     | 49.4                  | 0.0                     |
| PBE0-DH         | 16.8                           | -56.5                   | 19.0                      | -33.3                   | 43.3                        | 4.6                     | 34.3                      | 0.0                     | 45.9                  | 0.0                     |
| revDSD-BLYP     | 16.8                           | -49.4                   | 17.3                      | -25.5                   | 45.0                        | 9.4                     | 36.9                      | 0.0                     | 49.2                  | 0.0                     |
| revDSD-PBE      | 16.1                           | -52.3                   | 17.2                      | -27.1                   | 43.8                        | 7.2                     | 36.0                      | 0.0                     | 47.2                  | 0.0                     |
| revDSD-PBEP86   | 18.3                           | -49.6                   | 18.9                      | -25.0                   | 44.6                        | 8.1                     | 37.0                      | 0.0                     | 49.4                  | 0.0                     |
|                 | <i>Range-Separated Hybrids</i> |                         |                           |                         |                             |                         |                           |                         |                       |                         |
| CAM-B3LYP       | 23.2                           | -45.2                   | 21.9                      | -27.6                   | 46.3                        | 9.6                     | 37.2                      | 0.0                     | 51.6                  | 0.0                     |
| CAMY-B3LYP      | 21.3                           | -44.2                   | 20.5                      | -26.2                   | 45.6                        | 10.3                    | 36.1                      | 0.0                     | 49.7                  | 0.0                     |
| $\omega$ B97    | 22.7                           | -55.6                   | 22.3                      | -34.7                   | 46.8                        | 4.0                     | 40.2                      | 0.0                     | 53.3                  | 0.0                     |
| $\omega$ B97X   | 22.3                           | -52.0                   | 21.8                      | -32.0                   | 46.3                        | 6.0                     | 38.7                      | 0.0                     | 51.8                  | 0.0                     |
| $\omega$ B97X-D | 22.8                           | -47.5                   | 22.7                      | -27.7                   | 45.0                        | 6.8                     | 36.4                      | 0.0                     | 50.3                  | 0.0                     |

**Table S40** (continued).

| XC           | Diels-Alder Reaction        |                         | 1,3-dipolar Cycloaddition |                         | Electrocyclic Rearrangement |                         | Sigmatropic Rearrangement |                         | Double Group Transfer |                         |
|--------------|-----------------------------|-------------------------|---------------------------|-------------------------|-----------------------------|-------------------------|---------------------------|-------------------------|-----------------------|-------------------------|
|              | $\Delta E^\ddagger$         | $\Delta E_{\text{rxn}}$ | $\Delta E^\ddagger$       | $\Delta E_{\text{rxn}}$ | $\Delta E^\ddagger$         | $\Delta E_{\text{rxn}}$ | $\Delta E^\ddagger$       | $\Delta E_{\text{rxn}}$ | $\Delta E^\ddagger$   | $\Delta E_{\text{rxn}}$ |
|              | <i>Dispersion-Corrected</i> |                         |                           |                         |                             |                         |                           |                         |                       |                         |
| BP86-D3(BJ)  | 9.0                         | -46.5                   | 11.3                      | -24.0                   | 39.7                        | 9.0                     | 27.7                      | 0.0                     | 34.7                  | 0.0                     |
| BLYP-D3(BJ)  | 13.2                        | -35.9                   | 13.9                      | -15.7                   | 42.5                        | 14.4                    | 31.0                      | 0.0                     | 40.8                  | 0.0                     |
| PBE-D3(BJ)   | 9.1                         | -48.7                   | 11.4                      | -25.5                   | 39.2                        | 7.5                     | 27.3                      | 0.0                     | 33.6                  | 0.0                     |
| OLYP-D3(BJ)  | 7.9                         | -49.4                   | 12.4                      | -24.9                   | 39.6                        | 7.8                     | 27.7                      | 0.0                     | 36.3                  | 0.0                     |
| OPBE-D3(BJ)  | 3.6                         | -61.2                   | 10.9                      | -32.7                   | 36.2                        | 1.1                     | 24.4                      | 0.0                     | 30.0                  | 0.0                     |
| B3LYP-D3(BJ) | 16.0                        | -42.4                   | 17.2                      | -22.8                   | 44.8                        | 12.3                    | 34.4                      | 0.0                     | 45.9                  | 0.0                     |
| PBE0-D3(BJ)  | 13.0                        | -55.0                   | 15.9                      | -32.6                   | 42.1                        | 5.6                     | 31.9                      | 0.0                     | 41.0                  | 0.0                     |
| M06-2X-D3    | 17.3                        | -49.2                   | 20.7                      | -29.9                   | 44.7                        | 8.2                     | 36.3                      | 0.0                     | 48.6                  | 0.0                     |

**Table S41.** Errors in reaction barriers and reaction energies (kcal mol<sup>-1</sup>) for the various pericyclic reactions, computed with XC/TZ2P//BP86-D3(BJ)/QZ4P, compared to CCSDT(Q)/CBS//CCSD(T)/cc-pVTZ.

| XC              | Diels-Alder Reaction           |                         | 1,3-dipolar Cycloaddition |                         | Electrocyclic Rearrangement |                         | Sigmatropic Rearrangement |                         | Double Group Transfer |                         |  |
|-----------------|--------------------------------|-------------------------|---------------------------|-------------------------|-----------------------------|-------------------------|---------------------------|-------------------------|-----------------------|-------------------------|--|
|                 | $\Delta E^\ddagger$            | $\Delta E_{\text{rxn}}$ | $\Delta E^\ddagger$       | $\Delta E_{\text{rxn}}$ | $\Delta E^\ddagger$         | $\Delta E_{\text{rxn}}$ | $\Delta E^\ddagger$       | $\Delta E_{\text{rxn}}$ | $\Delta E^\ddagger$   | $\Delta E_{\text{rxn}}$ |  |
|                 | <i>LDA</i>                     |                         |                           |                         |                             |                         |                           |                         |                       |                         |  |
| VWN             | -18.8                          | -17.5                   | -15.1                     | -13.4                   | -7.1                        | -6.0                    | -14.7                     | 0.0                     | -28.1                 | 0.0                     |  |
|                 | <i>GGAs</i>                    |                         |                           |                         |                             |                         |                           |                         |                       |                         |  |
| BP86            | -4.6                           | 0.4                     | -2.9                      | 8.1                     | -3.8                        | -0.3                    | -8.6                      | 0.0                     | -12.1                 | 0.0                     |  |
| BLYP            | 1.4                            | 17.6                    | 0.9                       | 17.9                    | -0.7                        | 5.4                     | -5.0                      | 0.0                     | -5.0                  | 0.0                     |  |
| BEE             | -3.4                           | 4.6                     | -1.1                      | 8.9                     | -4.5                        | -2.2                    | -8.8                      | 0.0                     | -11.8                 | 0.0                     |  |
| PW91            | -7.2                           | 1.5                     | -5.0                      | 4.8                     | -4.1                        | -1.1                    | -9.0                      | 0.0                     | -14.4                 | 0.0                     |  |
| PBE             | -6.8                           | 1.4                     | -4.4                      | 5.1                     | -4.5                        | -1.8                    | -9.2                      | 0.0                     | -11.3                 | 0.0                     |  |
| PBEsol          | -12.9                          | -9.3                    | -9.4                      | -4.8                    | -6.7                        | -5.3                    | -12.7                     | 0.0                     | -21.8                 | 0.0                     |  |
| RPBE            | -0.8                           | 9.6                     | 0.9                       | 13.1                    | -3.5                        | -0.3                    | -7.0                      | 0.0                     | -8.5                  | 0.0                     |  |
| revPBE          | -1.1                           | 8.8                     | 0.7                       | 12.5                    | -3.7                        | -0.6                    | -7.5                      | 0.0                     | -9.0                  | 0.0                     |  |
| mPBE            | -5.2                           | 3.7                     | -3.0                      | 7.3                     | -4.2                        | -1.3                    | -8.6                      | 0.0                     | -12.8                 | 0.0                     |  |
| mPW             | -4.1                           | 5.8                     | -2.2                      | 9.1                     | -3.5                        | -0.1                    | -8.0                      | 0.0                     | -11.3                 | 0.0                     |  |
| HTBS            | -5.6                           | 0.5                     | -2.8                      | 4.8                     | -6.0                        | -3.9                    | -10.7                     | 0.0                     | -14.7                 | 0.0                     |  |
| OLYP            | 4.4                            | 11.7                    | 5.6                       | -7.1                    | -3.0                        | -1.4                    | -6.1                      | 0.0                     | -4.8                  | 0.0                     |  |
| OPBE            | -0.2                           | -0.9                    | 3.7                       | 6.4                     | -6.7                        | -8.5                    | -9.9                      | 0.0                     | -11.2                 | 0.0                     |  |
| XLYP            | 1.6                            | 18.8                    | 1.0                       | 18.8                    | -0.2                        | 6.2                     | -4.4                      | 0.0                     | -4.3                  | 0.0                     |  |
|                 | <i>Meta-GGAs</i>               |                         |                           |                         |                             |                         |                           |                         |                       |                         |  |
| M06-L           | -2.9                           | 1.7                     | 1.4                       | 11.7                    | 0.3                         | -2.5                    | -2.6                      | 0.0                     | -4.2                  | 0.0                     |  |
| MVS             | -6.9                           | -6.7                    | 0.1                       | 4.2                     | -0.7                        | -2.6                    | -8.4                      | 0.0                     | -13.4                 | 0.0                     |  |
| TPSS            | -4.1                           | 7.4                     | -2.4                      | 9.1                     | -3.2                        | -0.7                    | -5.9                      | 0.0                     | -7.3                  | 0.0                     |  |
| revTPSS         | -5.1                           | 5.4                     | -3.3                      | 6.0                     | -3.8                        | -2.3                    | -5.3                      | 0.0                     | -5.4                  | 0.0                     |  |
|                 | <i>Hybrids</i>                 |                         |                           |                         |                             |                         |                           |                         |                       |                         |  |
| B3LYP           | 2.9                            | 10.2                    | 3.4                       | 10.0                    | 1.4                         | 3.4                     | -1.8                      | 0.0                     | -0.6                  | 0.0                     |  |
| B3LYP*          | 1.0                            | 9.4                     | 1.5                       | 9.7                     | 0.4                         | 3.1                     | -3.3                      | 0.0                     | -3.5                  | 0.0                     |  |
| B1LYP           | 4.3                            | 10.4                    | 4.6                       | 9.7                     | 2.3                         | 3.7                     | -0.4                      | 0.0                     | 1.7                   | 0.0                     |  |
| B1PW91          | -0.1                           | -0.9                    | 2.8                       | 2.0                     | -1.0                        | -2.8                    | -3.7                      | 0.0                     | -4.0                  | 0.0                     |  |
| BHandH          | -6.8                           | -18.8                   | -3.6                      | -19.3                   | 0.9                         | -4.9                    | -2.5                      | 0.0                     | -7.6                  | 0.0                     |  |
| BHandHLYP       | 7.0                            | 3.2                     | 8.1                       | 1.1                     | 5.3                         | 1.9                     | 4.4                       | 0.0                     | 8.3                   | 0.0                     |  |
| KMLYP           | -0.6                           | -12.7                   | 2.5                       | -13.3                   | 3.2                         | -3.4                    | 1.3                       | 0.0                     | 0.1                   | 0.0                     |  |
| O3LYP           | -21.5                          | -28.1                   | -17.0                     | -24.2                   | -5.9                        | -7.2                    | -13.5                     | 0.0                     | -28.3                 | 0.0                     |  |
| OPBE0           | 1.7                            | -6.8                    | 6.1                       | -1.1                    | -3.3                        | -8.8                    | -5.1                      | 0.0                     | -4.9                  | 0.0                     |  |
| PBE0            | -3.1                           | -5.0                    | 0.0                       | -2.0                    | -1.5                        | -3.6                    | -4.6                      | 0.0                     | -7.1                  | 0.0                     |  |
| mPW1PW          | -1.0                           | -1.4                    | 1.8                       | 1.2                     | -0.7                        | -2.2                    | -3.5                      | 0.0                     | -4.5                  | 0.0                     |  |
| mPW1K           | -3.1                           | -5.0                    | 0.0                       | -2.0                    | -1.5                        | -3.6                    | -4.6                      | 0.0                     | -7.1                  | 0.0                     |  |
| S12H            | -3.3                           | -5.6                    | 0.9                       | -0.3                    | -0.6                        | -4.0                    | -2.6                      | 0.0                     | -6.0                  | 0.0                     |  |
| X3LYP           | 2.1                            | 8.6                     | 2.7                       | 8.2                     | 1.5                         | 3.2                     | -1.7                      | 0.0                     | -1.0                  | 0.0                     |  |
|                 | <i>Meta-Hybrids</i>            |                         |                           |                         |                             |                         |                           |                         |                       |                         |  |
| M06             | -0.4                           | -0.1                    | 3.9                       | 6.2                     | 0.1                         | -1.5                    | -1.8                      | 0.0                     | -1.7                  | 0.0                     |  |
| M06-2X          | -1.9                           | -1.1                    | 2.7                       | -0.8                    | 1.1                         | -0.6                    | 0.6                       | 0.0                     | -1.2                  | 0.0                     |  |
| M06-HF          | -5.8                           | -0.8                    | 0.1                       | -11.6                   | -0.6                        | 1.0                     | 0.5                       | 0.0                     | 0.4                   | 0.0                     |  |
| TPSSH           | -2.8                           | 4.5                     | -0.7                      | 6.0                     | -2.1                        | -1.6                    | -4.3                      | 0.0                     | -5.0                  | 0.0                     |  |
|                 | <i>Double-Hybrids</i>          |                         |                           |                         |                             |                         |                           |                         |                       |                         |  |
| B2K-PLYP        | -1.6                           | -1.0                    | -0.9                      | 3.6                     | 0.9                         | 0.6                     | 1.8                       | 0.0                     | -1.0                  | 0.0                     |  |
| B2T-PLYP        | -0.6                           | 2.3                     | -0.1                      | 6.1                     | 0.9                         | 1.5                     | 0.6                       | 0.0                     | -0.9                  | 0.0                     |  |
| B2-PLYP         | -0.6                           | 4.3                     | -0.3                      | 8.0                     | 0.5                         | 2.0                     | -0.3                      | 0.0                     | -1.7                  | 0.0                     |  |
| LS1-TPSS        | -5.5                           | -8.2                    | -3.6                      | -0.6                    | -1.2                        | -3.0                    | 1.9                       | 0.0                     | -4.6                  | 0.0                     |  |
| mPW2K-PLYP      | -1.9                           | -1.1                    | -1.3                      | 3.3                     | 1.0                         | 0.8                     | 1.8                       | 0.0                     | -1.2                  | 0.0                     |  |
| mPW2-PLYP       | -0.2                           | 3.3                     | 0.2                       | 6.1                     | 1.4                         | 2.2                     | 0.7                       | 0.0                     | -0.5                  | 0.0                     |  |
| PBE0-DH         | -2.7                           | -8.8                    | 0.5                       | -4.8                    | -0.5                        | -4.3                    | -1.7                      | 0.0                     | -4.1                  | 0.0                     |  |
| revDSD-BLYP     | -2.3                           | -1.0                    | -1.6                      | 3.6                     | 1.2                         | 1.2                     | 2.4                       | 0.0                     | -0.6                  | 0.0                     |  |
| revDSD-PBE      | -2.9                           | -3.8                    | -1.6                      | 2.0                     | 0.0                         | -1.2                    | 1.4                       | 0.0                     | -2.4                  | 0.0                     |  |
| revDSD-PBEP86   | -0.7                           | -1.1                    | 0.1                       | 4.2                     | 0.8                         | -0.3                    | 2.4                       | 0.0                     | -0.2                  | 0.0                     |  |
|                 | <i>Range-Separated Hybrids</i> |                         |                           |                         |                             |                         |                           |                         |                       |                         |  |
| CAM-B3LYP       | 3.6                            | 2.5                     | 3.6                       | 1.3                     | 2.9                         | 1.2                     | 0.4                       | 0.0                     | 1.4                   | 0.0                     |  |
| CAMY-B3LYP      | 1.7                            | 3.5                     | 2.2                       | 2.7                     | 2.2                         | 1.9                     | -0.7                      | 0.0                     | -0.5                  | 0.0                     |  |
| $\omega$ B97    | 3.1                            | -8.0                    | 4.0                       | -5.8                    | 3.4                         | -4.5                    | 3.4                       | 0.0                     | 3.1                   | 0.0                     |  |
| $\omega$ B97X   | 2.7                            | -4.4                    | 3.5                       | -3.1                    | 2.9                         | -2.5                    | 1.9                       | 0.0                     | 1.6                   | 0.0                     |  |
| $\omega$ B97X-D | 3.2                            | 0.1                     | 4.4                       | 1.2                     | 1.6                         | -1.7                    | -0.4                      | 0.0                     | 0.1                   | 0.0                     |  |

**Table S41 (continued).**

| XC           | Diels-Alder Reaction        |                         | 1,3-dipolar Cycloaddition |                         | Electrocyclic Rearrangement |                         | Sigmatropic Rearrangement |                         | Double Group Transfer |                         |
|--------------|-----------------------------|-------------------------|---------------------------|-------------------------|-----------------------------|-------------------------|---------------------------|-------------------------|-----------------------|-------------------------|
|              | $\Delta E^\ddagger$         | $\Delta E_{\text{rxn}}$ | $\Delta E^\ddagger$       | $\Delta E_{\text{rxn}}$ | $\Delta E^\ddagger$         | $\Delta E_{\text{rxn}}$ | $\Delta E^\ddagger$       | $\Delta E_{\text{rxn}}$ | $\Delta E^\ddagger$   | $\Delta E_{\text{rxn}}$ |
|              | <i>Dispersion-Corrected</i> |                         |                           |                         |                             |                         |                           |                         |                       |                         |
| BP86-D3(BJ)  | -10.8                       | 0.4                     | -7.1                      | 4.2                     | -4.0                        | 0.0                     | -9.1                      | 0.0                     | -15.5                 | 0.0                     |
| BLYP-D3(BJ)  | -6.6                        | 11.2                    | -4.5                      | 12.7                    | -1.1                        | 5.5                     | -5.9                      | 0.0                     | -9.4                  | 0.0                     |
| PBE-D3(BJ)   | -10.7                       | -1.9                    | -7.1                      | 2.6                     | -4.6                        | -1.7                    | -9.6                      | 0.0                     | -16.6                 | 0.0                     |
| OLYP-D3(BJ)  | -12.0                       | -2.7                    | -6.2                      | 3.0                     | -4.4                        | -1.6                    | -9.3                      | 0.0                     | -14.1                 | 0.0                     |
| OPBE-D3(BJ)  | -15.4                       | -13.7                   | -7.8                      | -5.3                    | -6.9                        | -7.6                    | -12.6                     | 0.0                     | -20.3                 | 0.0                     |
| B3LYP-D3(BJ) | -3.6                        | 5.0                     | -1.1                      | 5.8                     | 1.1                         | 3.5                     | -2.4                      | 0.0                     | -4.2                  | 0.0                     |
| PBE0-D3(BJ)  | -6.6                        | -7.8                    | -2.4                      | -4.3                    | -1.7                        | -3.5                    | -4.8                      | 0.0                     | -9.1                  | 0.0                     |
| M06-2X-D3    | -2.0                        | -1.2                    | 2.6                       | -0.8                    | 1.1                         | -0.6                    | -0.3                      | 0.0                     | -1.3                  | 0.0                     |

**Table S42.** Mean error (ME), mean absolute error (MAE), maximum unsigned error (MUE) and standard deviation (SD) of reaction barriers and energies (kcal mol<sup>-1</sup>) for the various pericyclic reactions, computed with XC/TZ2P//BP86-D3(BJ)/QZ4P compared to CCSDT(Q)/CBS//CCSD(T)/cc-pVTZ.

| XC              | $\Delta E^\ddagger$ |      |      |     | $\Delta E_{\text{rxn}}$ |                                |      |     | Total |      |      |     |
|-----------------|---------------------|------|------|-----|-------------------------|--------------------------------|------|-----|-------|------|------|-----|
|                 | ME                  | MAE  | MUE  | SD  | ME                      | MAE                            | MUE  | SD  | ME    | MAE  | MUE  | SD  |
| VWN             | -16.6               | 16.6 | 28.1 | 6.9 | -11.7                   | 11.7                           | 17.0 | 4.7 | -14.8 | 14.8 | 28.1 | 6.6 |
|                 |                     |      |      |     |                         | <i>LDA</i>                     |      |     |       |      |      |     |
|                 |                     |      |      |     |                         | <i>GGAs</i>                    |      |     |       |      |      |     |
| BP86            | -6.3                | 6.3  | 12.1 | 3.5 | 5.1                     | 5.1                            | 8.8  | 3.5 | -2.0  | 5.8  | 12.1 | 3.6 |
| BLYP            | -1.6                | 2.6  | 5.0  | 2.0 | 14.1                    | 14.1                           | 18.4 | 5.8 | 4.3   | 6.9  | 18.4 | 6.8 |
| BEE             | -5.7                | 5.7  | 11.7 | 3.9 | 4.6                     | 5.5                            | 9.8  | 3.4 | -1.9  | 5.6  | 11.7 | 3.8 |
| PW91            | -7.8                | 7.8  | 14.4 | 3.8 | 2.4                     | 2.7                            | 5.6  | 2.1 | -4.0  | 5.9  | 14.4 | 4.1 |
| PBE             | -7.7                | 7.7  | 14.3 | 3.8 | 2.3                     | 3.0                            | 6.0  | 2.1 | -3.9  | 5.9  | 14.3 | 4.0 |
| PBEsol          | -12.5               | 12.5 | 21.7 | 5.2 | -5.7                    | 5.7                            | 8.6  | 2.0 | -10.0 | 10.0 | 21.7 | 5.4 |
| RPBE            | -3.6                | 4.0  | 8.4  | 3.1 | 8.3                     | 8.3                            | 14.0 | 5.7 | 0.8   | 5.6  | 14.0 | 4.8 |
| revPBE          | -3.9                | 4.3  | 8.9  | 3.3 | 7.7                     | 7.7                            | 13.4 | 5.6 | 0.4   | 5.6  | 13.4 | 4.6 |
| mPBE            | -6.6                | 6.6  | 12.7 | 3.6 | 4.0                     | 4.3                            | 8.1  | 3.1 | -2.6  | 5.7  | 12.7 | 3.6 |
| mPW             | -5.6                | 5.6  | 11.2 | 3.4 | 5.6                     | 5.6                            | 9.9  | 3.9 | -1.4  | 5.6  | 11.2 | 3.6 |
| HTBS            | -7.8                | 7.8  | 14.7 | 4.4 | 1.3                     | 3.4                            | 5.8  | 1.9 | -4.4  | 6.1  | 14.7 | 4.2 |
| OLYP            | -0.5                | 4.8  | 6.0  | 1.2 | 9.5                     | 9.8                            | 16.3 | 6.8 | 3.2   | 6.6  | 16.3 | 4.9 |
| OPBE            | -4.5                | 6.2  | 11.1 | 3.9 | 0.3                     | 5.1                            | 7.9  | 3.5 | -2.7  | 5.8  | 11.1 | 3.8 |
| XLYP            | -1.2                | 2.3  | 4.4  | 1.7 | 15.1                    | 15.1                           | 19.4 | 5.9 | 4.9   | 7.1  | 19.4 | 7.3 |
|                 |                     |      |      |     |                         | <i>Meta-GGAs</i>               |      |     |       |      |      |     |
| M06-L           | -1.6                | 2.3  | 4.1  | 1.3 | 4.5                     | 5.5                            | 12.3 | 4.8 | 0.7   | 3.5  | 12.3 | 3.5 |
| MVS             | -6.0                | 6.0  | 13.4 | 5.0 | -1.4                    | 4.3                            | 6.7  | 1.9 | -4.3  | 5.4  | 13.4 | 4.2 |
| TPSS            | -4.4                | 4.4  | 7.3  | 1.9 | 6.0                     | 6.0                            | 9.9  | 4.3 | -0.5  | 5.0  | 9.9  | 3.1 |
| revTPSS         | -4.5                | 4.5  | 5.4  | 1.0 | 3.7                     | 4.8                            | 6.8  | 2.3 | -1.4  | 4.6  | 6.8  | 1.6 |
|                 |                     |      |      |     |                         | <i>Hybrids</i>                 |      |     |       |      |      |     |
| B3LYP           | 1.1                 | 2.1  | 3.3  | 0.9 | 8.2                     | 8.2                            | 10.5 | 3.1 | 3.7   | 4.4  | 10.5 | 3.6 |
| B3LYP*          | -0.8                | 2.0  | 3.6  | 1.2 | 7.8                     | 7.8                            | 10.1 | 3.0 | 2.4   | 4.2  | 10.1 | 3.5 |
| B1LYP           | 2.5                 | 2.7  | 4.5  | 1.6 | 8.2                     | 8.2                            | 10.7 | 3.0 | 4.6   | 4.7  | 10.7 | 3.5 |
| B1PW91          | -1.2                | 2.3  | 4.2  | 1.7 | -0.1                    | 1.7                            | 2.5  | 0.8 | -0.8  | 2.1  | 4.2  | 1.4 |
| BHandH          | -4.0                | 4.4  | 7.8  | 2.6 | -14.1                   | 14.1                           | 19.0 | 6.9 | -7.8  | 8.1  | 19.0 | 6.6 |
| BHandHLYP       | 6.5                 | 6.5  | 8.1  | 1.4 | 2.2                     | 2.2                            | 3.1  | 0.8 | 4.9   | 4.9  | 8.1  | 2.4 |
| KMLYP           | 1.2                 | 1.6  | 3.4  | 1.1 | -9.6                    | 9.6                            | 13.1 | 4.7 | -2.9  | 4.6  | 13.1 | 4.9 |
| O3LYP           | -17.1               | 17.1 | 28.4 | 7.6 | -19.6                   | 19.6                           | 27.7 | 8.6 | -18.1 | 18.1 | 28.4 | 8.1 |
| OPBE0           | -0.9                | 4.2  | 6.2  | 1.6 | -4.6                    | 4.6                            | 7.8  | 3.3 | -2.3  | 4.3  | 7.8  | 2.4 |
| PBE0            | -3.2                | 3.2  | 7.2  | 2.6 | -3.0                    | 3.0                            | 4.7  | 1.3 | -3.1  | 3.1  | 7.2  | 2.2 |
| mPW1PW          | -1.5                | 2.2  | 4.6  | 1.6 | -0.3                    | 1.4                            | 1.7  | 0.3 | -1.1  | 1.9  | 4.6  | 1.3 |
| mPW1K           | 1.3                 | 1.5  | 4.4  | 1.6 | -4.6                    | 4.6                            | 6.4  | 1.3 | -0.9  | 2.6  | 6.4  | 2.1 |
| S12H            | -2.2                | 2.6  | 5.9  | 2.0 | -2.5                    | 2.8                            | 4.9  | 1.8 | -2.3  | 2.7  | 5.9  | 1.9 |
| X3LYP           | 0.8                 | 1.9  | 2.7  | 0.5 | 7.0                     | 7.0                            | 8.9  | 2.4 | 3.1   | 3.8  | 8.9  | 2.9 |
|                 |                     |      |      |     |                         | <i>Meta-Hybrids</i>            |      |     |       |      |      |     |
| M06             | 0.0                 | 1.7  | 3.8  | 1.2 | 1.9                     | 2.6                            | 6.6  | 2.8 | 0.7   | 2.0  | 6.6  | 2.0 |
| M06-2X          | -0.1                | 1.6  | 2.5  | 0.7 | -0.8                    | 0.8                            | 1.4  | 0.5 | -0.4  | 1.3  | 2.5  | 0.7 |
| M06-HF          | -0.7                | 1.5  | 5.2  | 1.8 | -4.1                    | 4.7                            | 12.0 | 5.2 | -2.0  | 2.7  | 12.0 | 3.8 |
| TPSSH           | -2.9                | 2.9  | 5.0  | 1.6 | 3.6                     | 4.2                            | 6.7  | 2.4 | -0.4  | 3.4  | 6.7  | 2.1 |
|                 |                     |      |      |     |                         | <i>Double-Hybrids</i>          |      |     |       |      |      |     |
| B2K-PLYP        | -0.4                | 1.0  | 1.6  | 0.6 | 1.1                     | 1.9                            | 3.8  | 1.4 | 0.1   | 1.3  | 3.8  | 1.0 |
| B2T-PLYP        | -0.2                | 1.0  | 1.4  | 0.3 | 3.3                     | 3.3                            | 6.3  | 2.1 | 1.1   | 1.9  | 6.3  | 1.7 |
| B2-PLYP         | -0.6                | 1.1  | 1.9  | 0.6 | 4.8                     | 4.8                            | 8.2  | 2.5 | 1.4   | 2.5  | 8.2  | 2.4 |
| LS1-TPSS        | -3.2                | 3.2  | 5.6  | 1.8 | -3.9                    | 3.9                            | 8.5  | 3.4 | -3.5  | 3.5  | 8.5  | 2.5 |
| mPW2K-PLYP      | -0.6                | 1.2  | 2.0  | 0.6 | 1.0                     | 1.9                            | 3.5  | 1.2 | 0.0   | 1.4  | 3.5  | 0.9 |
| mPW2-PLYP       | 0.1                 | 0.9  | 1.8  | 0.5 | 3.9                     | 3.9                            | 6.3  | 1.7 | 1.5   | 2.0  | 6.3  | 1.8 |
| PBE0-DH         | -1.8                | 2.1  | 4.3  | 1.5 | -5.7                    | 5.7                            | 8.9  | 2.2 | -3.3  | 3.4  | 8.9  | 2.5 |
| revDSD-BLYP     | -0.6                | 1.3  | 2.8  | 0.9 | 0.9                     | 2.0                            | 3.4  | 1.0 | -0.1  | 1.6  | 3.4  | 1.0 |
| revDSD-PBE      | -1.6                | 1.7  | 3.5  | 1.3 | -1.4                    | 2.6                            | 4.7  | 1.5 | -1.5  | 2.0  | 4.7  | 1.4 |
| revDSD-PBEP86   | 0.0                 | 0.8  | 1.3  | 0.4 | 0.5                     | 2.1                            | 3.9  | 1.4 | 0.2   | 1.3  | 3.9  | 1.1 |
|                 |                     |      |      |     |                         | <i>Range-Separated Hybrids</i> |      |     |       |      |      |     |
| CAM-B3LYP       | 2.4                 | 2.4  | 3.6  | 1.3 | 1.6                     | 1.6                            | 2.5  | 0.6 | 2.1   | 2.1  | 3.6  | 1.1 |
| CAMY-B3LYP      | 1.0                 | 1.5  | 2.2  | 0.7 | 2.7                     | 2.7                            | 3.5  | 0.7 | 1.6   | 1.9  | 3.5  | 0.9 |
| $\omega$ B97    | 3.4                 | 3.4  | 4.0  | 0.3 | -6.1                    | 6.1                            | 8.0  | 1.4 | -0.2  | 4.4  | 8.0  | 1.6 |
| $\omega$ B97X   | 2.5                 | 2.5  | 3.5  | 0.7 | -3.3                    | 3.3                            | 4.4  | 0.8 | 0.3   | 2.8  | 4.4  | 0.8 |
| $\omega$ B97X-D | 1.8                 | 1.9  | 4.4  | 1.7 | -0.1                    | 1.0                            | 1.7  | 0.6 | 1.1   | 1.6  | 4.4  | 1.4 |



**Table S42 (continued).**

| XC           | $\Delta E^\ddagger$         |      |      |     | $\Delta E_{\text{rxn}}$ |      |      |     | Total |      |      |     |
|--------------|-----------------------------|------|------|-----|-------------------------|------|------|-----|-------|------|------|-----|
|              | ME                          | MAE  | MUE  | SD  | ME                      | MAE  | MUE  | SD  | ME    | MAE  | MUE  | SD  |
|              | <i>Dispersion-Corrected</i> |      |      |     |                         |      |      |     |       |      |      |     |
| BP86-D3(BJ)  | -9.2                        | 9.2  | 15.5 | 3.9 | 2.2                     | 2.2  | 4.9  | 1.9 | -4.9  | 6.6  | 15.5 | 4.7 |
| BLYP-D3(BJ)  | -5.4                        | 5.4  | 9.4  | 2.8 | 10.3                    | 10.3 | 13.2 | 3.1 | 0.5   | 7.2  | 13.2 | 3.8 |
| PBE-D3(BJ)   | -9.5                        | 9.5  | 16.6 | 4.2 | 0.5                     | 1.8  | 3.4  | 1.1 | -5.8  | 6.6  | 16.6 | 5.0 |
| OLYP-D3(BJ)  | -8.9                        | 8.9  | 13.9 | 3.7 | 0.5                     | 2.1  | 4.0  | 1.4 | -5.4  | 6.3  | 13.9 | 4.5 |
| OPBE-D3(BJ)  | -12.6                       | 12.6 | 20.2 | 5.0 | -8.2                    | 8.2  | 13.6 | 4.0 | -11.0 | 11.0 | 20.2 | 5.1 |
| B3LYP-D3(BJ) | -2.0                        | 2.5  | 4.3  | 1.2 | 5.1                     | 5.1  | 6.1  | 0.9 | 0.6   | 3.5  | 6.1  | 1.7 |
| PBE0-D3(BJ)  | -4.9                        | 4.9  | 9.2  | 2.8 | -4.6                    | 4.6  | 7.4  | 1.9 | -4.8  | 4.8  | 9.2  | 2.5 |
| M06-2X-D3    | -0.1                        | 1.6  | 2.4  | 0.7 | -0.9                    | 0.9  | 1.6  | 0.5 | -0.4  | 1.4  | 2.4  | 0.7 |

**Table S43.** Reaction barriers and reaction energies (kcal mol<sup>-1</sup>) for the various pericyclic reactions, computed with XC/QZ4P//BP86-D3(BJ)/QZ4P.

| XC            | Diels-Alder Reaction |                         | 1,3-dipolar Cycloaddition |                         | Electrocyclic Rearrangement    |                         | Sigmatropic Rearrangement |                         | Double Group Transfer |                         |
|---------------|----------------------|-------------------------|---------------------------|-------------------------|--------------------------------|-------------------------|---------------------------|-------------------------|-----------------------|-------------------------|
|               | $\Delta E^\ddagger$  | $\Delta E_{\text{rxn}}$ | $\Delta E^\ddagger$       | $\Delta E_{\text{rxn}}$ | $\Delta E^\ddagger$            | $\Delta E_{\text{rxn}}$ | $\Delta E^\ddagger$       | $\Delta E_{\text{rxn}}$ | $\Delta E^\ddagger$   | $\Delta E_{\text{rxn}}$ |
| VWN           | 0.8                  | -65.1                   | 3.2                       | -42.3                   | 36.3                           | 2.5                     | 22.1                      | 0.0                     | 22.1                  | 0.0                     |
|               |                      |                         |                           |                         | <i>LDA</i>                     |                         |                           |                         |                       |                         |
|               |                      |                         |                           |                         | <i>GGAs</i>                    |                         |                           |                         |                       |                         |
| BP86          | 15.0                 | -47.2                   | 15.4                      | -20.8                   | 39.6                           | 8.2                     | 28.2                      | 0.0                     | 38.1                  | 0.0                     |
| BLYP          | 21.0                 | -30.1                   | 19.2                      | -11.0                   | 42.7                           | 13.8                    | 31.8                      | 0.0                     | 45.2                  | 0.0                     |
| BEE           | 16.2                 | -43.1                   | 17.2                      | -20.0                   | 38.9                           | 6.3                     | 28.0                      | 0.0                     | 38.4                  | 0.0                     |
| PW91          | 12.4                 | -46.2                   | 13.3                      | -24.1                   | 39.3                           | 7.4                     | 27.8                      | 0.0                     | 35.8                  | 0.0                     |
| PBE           | 12.8                 | -46.3                   | 13.9                      | -23.8                   | 38.9                           | 6.7                     | 27.6                      | 0.0                     | 38.9                  | 0.0                     |
| PBEsol        | 6.7                  | -56.9                   | 8.9                       | -33.7                   | 36.7                           | 3.2                     | 24.1                      | 0.0                     | 28.4                  | 0.0                     |
| RPBE          | 18.8                 | -38.1                   | 19.2                      | -15.8                   | 39.9                           | 8.2                     | 29.8                      | 0.0                     | 41.7                  | 0.0                     |
| revPBE        | 18.5                 | -38.9                   | 19.0                      | -16.4                   | 39.7                           | 7.8                     | 29.3                      | 0.0                     | 41.2                  | 0.0                     |
| mPBE          | 14.4                 | -44.0                   | 15.3                      | -21.6                   | 39.2                           | 7.2                     | 28.2                      | 0.0                     | 37.4                  | 0.0                     |
| mPW           | 15.5                 | -41.9                   | 16.1                      | -19.8                   | 39.9                           | 8.3                     | 28.8                      | 0.0                     | 38.9                  | 0.0                     |
| HTBS          | 14.0                 | -47.1                   | 15.5                      | -24.1                   | 37.4                           | 4.6                     | 26.1                      | 0.0                     | 35.5                  | 0.0                     |
| OLYP          | 24.0                 | -36.0                   | 23.9                      | -36.0                   | 40.4                           | 7.1                     | 30.7                      | 0.0                     | 45.4                  | 0.0                     |
| OPBE          | 19.4                 | -48.5                   | 22.0                      | -22.5                   | 36.7                           | 0.0                     | 26.9                      | 0.0                     | 39.0                  | 0.0                     |
| XLYP          | 21.2                 | -28.9                   | 19.3                      | -10.1                   | 43.2                           | 14.6                    | 32.4                      | 0.0                     | 45.9                  | 0.0                     |
|               |                      |                         |                           |                         | <i>Meta-GGAs</i>               |                         |                           |                         |                       |                         |
| M06-L         | 16.7                 | -46.0                   | 19.7                      | -17.2                   | 43.7                           | 6.0                     | 34.2                      | 0.0                     | 46.0                  | 0.0                     |
| MVS           | 12.7                 | -54.3                   | 18.4                      | -24.7                   | 42.7                           | 5.9                     | 28.4                      | 0.0                     | 36.8                  | 0.0                     |
| TPSS          | 15.5                 | -40.3                   | 15.9                      | -19.8                   | 40.2                           | 7.7                     | 30.9                      | 0.0                     | 42.9                  | 0.0                     |
| revTPSS       | 14.5                 | -42.3                   | 15.0                      | -22.9                   | 39.6                           | 6.2                     | 31.5                      | 0.0                     | 44.8                  | 0.0                     |
|               |                      |                         |                           |                         | <i>Hybrids</i>                 |                         |                           |                         |                       |                         |
| B3LYP         | 22.5                 | -37.5                   | 21.7                      | -18.9                   | 44.8                           | 11.8                    | 35.0                      | 0.0                     | 49.6                  | 0.0                     |
| B3LYP*        | 20.6                 | -38.3                   | 19.8                      | -19.2                   | 43.8                           | 11.5                    | 33.5                      | 0.0                     | 46.7                  | 0.0                     |
| B1LYP         | 23.9                 | -37.3                   | 22.9                      | -19.2                   | 45.7                           | 12.1                    | 36.4                      | 0.0                     | 51.9                  | 0.0                     |
| B1PW91        | 19.5                 | -48.5                   | 21.1                      | -26.9                   | 42.4                           | 5.7                     | 33.1                      | 0.0                     | 46.2                  | 0.0                     |
| BHandH        | 12.8                 | -66.4                   | 14.7                      | -48.2                   | 44.3                           | 3.6                     | 34.3                      | 0.0                     | 42.6                  | 0.0                     |
| BHandHLYP     | 26.6                 | -44.5                   | 26.4                      | -27.8                   | 48.7                           | 10.3                    | 41.2                      | 0.0                     | 58.5                  | 0.0                     |
| KMLYP         | 19.0                 | -60.3                   | 20.8                      | -42.2                   | 46.6                           | 5.1                     | 38.1                      | 0.0                     | 50.3                  | 0.0                     |
| O3LYP         | -1.9                 | -75.7                   | 1.3                       | -53.1                   | 37.5                           | 1.3                     | 23.3                      | 0.0                     | 21.9                  | 0.0                     |
| OPBE0         | 21.3                 | -54.4                   | 24.4                      | -30.0                   | 40.1                           | -0.3                    | 31.7                      | 0.0                     | 45.3                  | 0.0                     |
| PBE0          | 16.5                 | -52.6                   | 18.3                      | -30.9                   | 41.9                           | 4.9                     | 32.2                      | 0.0                     | 43.1                  | 0.0                     |
| mPW1PW        | 18.6                 | -49.0                   | 20.1                      | -27.7                   | 42.7                           | 6.3                     | 33.3                      | 0.0                     | 45.7                  | 0.0                     |
| mPW1K         | 16.5                 | -52.6                   | 18.3                      | -30.9                   | 41.9                           | 4.9                     | 32.2                      | 0.0                     | 43.1                  | 0.0                     |
| S12H          | 16.3                 | -53.2                   | 19.2                      | -29.2                   | 42.8                           | 4.5                     | 34.2                      | 0.0                     | 44.2                  | 0.0                     |
| X3LYP         | 21.7                 | -39.1                   | 21.0                      | -20.7                   | 44.9                           | 11.6                    | 35.1                      | 0.0                     | 49.2                  | 0.0                     |
|               |                      |                         |                           |                         | <i>Meta-Hybrids</i>            |                         |                           |                         |                       |                         |
| M06           | 19.2                 | -47.7                   | 22.2                      | -22.7                   | 43.5                           | 7.0                     | 35.0                      | 0.0                     | 48.5                  | 0.0                     |
| M06-2X        | 17.7                 | -48.7                   | 21.0                      | -29.7                   | 44.5                           | 7.8                     | 37.4                      | 0.0                     | 49.0                  | 0.0                     |
| M06-HF        | 13.8                 | -48.4                   | 18.4                      | -40.5                   | 42.8                           | 9.4                     | 37.3                      | 0.0                     | 50.6                  | 0.0                     |
| TPSSH         | 16.8                 | -43.2                   | 17.6                      | -22.9                   | 41.3                           | 6.9                     | 32.5                      | 0.0                     | 45.2                  | 0.0                     |
|               |                      |                         |                           |                         | <i>Double-Hybrids</i>          |                         |                           |                         |                       |                         |
| B2K-PLYP      | 18.0                 | -48.6                   | 17.4                      | -25.3                   | 44.3                           | 9.0                     | 38.6                      | 0.0                     | 49.2                  | 0.0                     |
| B2T-PLYP      | 19.0                 | -45.4                   | 18.2                      | -22.8                   | 44.3                           | 9.9                     | 37.4                      | 0.0                     | 49.3                  | 0.0                     |
| B2-PLYP       | 19.0                 | -43.4                   | 18.0                      | -20.9                   | 43.9                           | 10.4                    | 36.5                      | 0.0                     | 48.5                  | 0.0                     |
| LS1-TPSS      | 14.1                 | -55.8                   | 14.7                      | -29.5                   | 42.2                           | 5.5                     | 38.7                      | 0.0                     | 45.6                  | 0.0                     |
| mPW2K-PLYP    | 17.7                 | -48.7                   | 17.0                      | -25.6                   | 44.4                           | 9.2                     | 38.6                      | 0.0                     | 49.0                  | 0.0                     |
| mPW2-PLYP     | 19.4                 | -44.4                   | 18.5                      | -22.8                   | 44.8                           | 10.6                    | 37.5                      | 0.0                     | 49.7                  | 0.0                     |
| PBE0-DH       | 16.9                 | -56.4                   | 18.8                      | -33.7                   | 42.9                           | 4.2                     | 35.1                      | 0.0                     | 46.1                  | 0.0                     |
| revDSD-BLYP   | 17.3                 | -48.6                   | 16.7                      | -25.3                   | 44.6                           | 9.6                     | 39.2                      | 0.0                     | 49.6                  | 0.0                     |
| revDSD-PBE    | 16.7                 | -51.4                   | 16.7                      | -26.9                   | 43.4                           | 7.3                     | 38.2                      | 0.0                     | 47.8                  | 0.0                     |
| revDSD-PBEP86 | 18.9                 | -48.7                   | 18.4                      | -24.7                   | 44.2                           | 8.2                     | 39.2                      | 0.0                     | 50.0                  | 0.0                     |
|               |                      |                         |                           |                         | <i>Range-Separated Hybrids</i> |                         |                           |                         |                       |                         |
| CAM-B3LYP     | 23.3                 | -45.3                   | 22.0                      | -27.8                   | 46.0                           | 9.3                     | 37.3                      | 0.0                     | 51.7                  | 0.0                     |
| CAMY-B3LYP    | 21.4                 | -44.4                   | 20.5                      | -26.5                   | 45.3                           | 9.9                     | 36.1                      | 0.0                     | 49.8                  | 0.0                     |
| ωB97          | 22.9                 | -56.1                   | 22.5                      | -35.3                   | 46.4                           | 3.1                     | 40.2                      | 0.0                     | 53.2                  | 0.0                     |
| ωB97X         | 22.4                 | -52.2                   | 22.1                      | -32.3                   | 45.9                           | 5.4                     | 38.8                      | 0.0                     | 51.8                  | 0.0                     |
| ωB97X-D       | 22.8                 | -47.7                   | 22.9                      | -28.0                   | 44.6                           | 6.3                     | 36.4                      | 0.0                     | 50.3                  | 0.0                     |

**Table S43** (continued).

| XC           | Diels-Alder Reaction        |                         | 1,3-dipolar Cycloaddition |                         | Electrocyclic Rearrangement |                         | Sigmatropic Rearrangement |                         | Double Group Transfer |                         |
|--------------|-----------------------------|-------------------------|---------------------------|-------------------------|-----------------------------|-------------------------|---------------------------|-------------------------|-----------------------|-------------------------|
|              | $\Delta E^\ddagger$         | $\Delta E_{\text{rxn}}$ | $\Delta E^\ddagger$       | $\Delta E_{\text{rxn}}$ | $\Delta E^\ddagger$         | $\Delta E_{\text{rxn}}$ | $\Delta E^\ddagger$       | $\Delta E_{\text{rxn}}$ | $\Delta E^\ddagger$   | $\Delta E_{\text{rxn}}$ |
|              | <i>Dispersion-Corrected</i> |                         |                           |                         |                             |                         |                           |                         |                       |                         |
| BP86-D3(BJ)  | 8.8                         | -47.2                   | 11.2                      | -24.7                   | 39.4                        | 8.4                     | 27.7                      | 0.0                     | 34.7                  | 0.0                     |
| BLYP-D3(BJ)  | 13.0                        | -36.5                   | 13.8                      | -16.2                   | 42.3                        | 13.9                    | 30.9                      | 0.0                     | 40.8                  | 0.0                     |
| PBE-D3(BJ)   | 8.9                         | -49.5                   | 11.2                      | -26.3                   | 38.8                        | 6.8                     | 27.2                      | 0.0                     | 33.6                  | 0.0                     |
| OLYP-D3(BJ)  | 7.6                         | -50.3                   | 12.1                      | -25.9                   | 39.0                        | 6.9                     | 27.5                      | 0.0                     | 36.1                  | 0.0                     |
| OPBE-D3(BJ)  | 4.2                         | -61.3                   | 10.5                      | -34.2                   | 36.5                        | 0.9                     | 24.2                      | 0.0                     | 29.9                  | 0.0                     |
| B3LYP-D3(BJ) | 16.0                        | -42.7                   | 17.2                      | -23.1                   | 44.5                        | 11.9                    | 34.4                      | 0.0                     | 46.0                  | 0.0                     |
| PBE0-D3(BJ)  | 13.0                        | -55.4                   | 15.9                      | -33.2                   | 41.7                        | 5.0                     | 32.0                      | 0.0                     | 41.1                  | 0.0                     |
| M06-2X-D3    | 17.6                        | -48.8                   | 20.9                      | -29.7                   | 44.5                        | 7.8                     | 36.5                      | 0.0                     | 48.9                  | 0.0                     |

**Table S44.** Errors in reaction barriers and reaction energies (kcal mol<sup>-1</sup>) for the various pericyclic reactions, computed with XC/TZ2P//BP86-D3(BJ)/QZ4P, compared to CCSDT(Q)/CBS//CCSD(T)/cc-pVTZ.

| XC              | Diels-Alder Reaction           |                         | 1,3-dipolar Cycloaddition |                         | Electrocyclic Rearrangement |                         | Sigmatropic Rearrangement |                         | Double Group Transfer |                         |
|-----------------|--------------------------------|-------------------------|---------------------------|-------------------------|-----------------------------|-------------------------|---------------------------|-------------------------|-----------------------|-------------------------|
|                 | $\Delta E^\ddagger$            | $\Delta E_{\text{rxn}}$ | $\Delta E^\ddagger$       | $\Delta E_{\text{rxn}}$ | $\Delta E^\ddagger$         | $\Delta E_{\text{rxn}}$ | $\Delta E^\ddagger$       | $\Delta E_{\text{rxn}}$ | $\Delta E^\ddagger$   | $\Delta E_{\text{rxn}}$ |
|                 | <i>LDA</i>                     |                         |                           |                         |                             |                         |                           |                         |                       |                         |
| VWN             | -18.6                          | -17.0                   | -15.0                     | -12.6                   | -6.7                        | -5.5                    | -14.6                     | 0.0                     | -28.1                 | 0.0                     |
|                 | <i>GGAs</i>                    |                         |                           |                         |                             |                         |                           |                         |                       |                         |
| BP86            | -4.4                           | 6.1                     | -2.8                      | 8.8                     | -3.5                        | 0.4                     | -8.6                      | 0.0                     | -12.1                 | 0.0                     |
| BLYP            | 1.5                            | 18.1                    | 1.1                       | 18.4                    | -0.4                        | 5.9                     | -5.0                      | 0.0                     | -5.0                  | 0.0                     |
| BEE             | -3.2                           | 5.4                     | -0.9                      | 9.8                     | -4.1                        | -1.4                    | -8.7                      | 0.0                     | -11.7                 | 0.0                     |
| PW91            | -7.0                           | 2.2                     | -4.8                      | 5.6                     | -3.8                        | -0.4                    | -8.9                      | 0.0                     | -14.4                 | 0.0                     |
| PBE             | -6.5                           | 2.1                     | -4.2                      | 6.0                     | -4.1                        | -1.1                    | -9.2                      | 0.0                     | -14.3                 | 0.0                     |
| PBEsol          | -12.6                          | -8.6                    | -9.2                      | -3.9                    | -6.3                        | -4.7                    | -12.7                     | 0.0                     | -21.7                 | 0.0                     |
| RPBE            | -0.6                           | 10.4                    | 1.1                       | 14.0                    | -3.1                        | 0.5                     | -7.0                      | 0.0                     | -8.4                  | 0.0                     |
| revPBE          | -0.9                           | 9.6                     | 1.0                       | 13.4                    | -3.3                        | 0.1                     | -7.4                      | 0.0                     | -8.9                  | 0.0                     |
| mPBE            | -5.0                           | 4.4                     | -2.8                      | 8.1                     | -3.8                        | -0.5                    | -8.5                      | 0.0                     | -12.7                 | 0.0                     |
| mPW             | -3.9                           | 6.5                     | -2.0                      | 9.9                     | -3.2                        | 0.5                     | -7.9                      | 0.0                     | -11.2                 | 0.0                     |
| HTBS            | -5.4                           | 1.3                     | -2.5                      | 5.8                     | -5.5                        | -3.1                    | -10.7                     | 0.0                     | -14.7                 | 0.0                     |
| OLYP            | 4.7                            | 12.6                    | 5.9                       | 16.3                    | -2.5                        | -0.4                    | -6.0                      | 0.0                     | -4.6                  | 0.0                     |
| OPBE            | 0.2                            | 0.3                     | 4.1                       | 7.9                     | -6.0                        | -7.3                    | -9.7                      | 0.0                     | -11.1                 | 0.0                     |
| XLYP            | 1.8                            | 19.4                    | 1.1                       | 19.2                    | 0.0                         | 6.7                     | -4.4                      | 0.0                     | -4.3                  | 0.0                     |
|                 | <i>Meta-GGAs</i>               |                         |                           |                         |                             |                         |                           |                         |                       |                         |
| M06-L           | -3.1                           | 2.8                     | 1.2                       | 12.3                    | 0.5                         | -1.6                    | -2.5                      | 0.0                     | -4.1                  | 0.0                     |
| MVS             | -7.5                           | -6.7                    | -0.4                      | 4.3                     | -0.3                        | -2.0                    | -8.4                      | 0.0                     | -13.4                 | 0.0                     |
| TPSS            | -4.0                           | 8.2                     | -2.2                      | 9.9                     | -2.8                        | 0.1                     | -5.8                      | 0.0                     | -7.3                  | 0.0                     |
| revTPSS         | -5.0                           | 6.0                     | -3.2                      | 6.8                     | -3.4                        | -1.6                    | -5.3                      | 0.0                     | -5.4                  | 0.0                     |
|                 | <i>Hybrids</i>                 |                         |                           |                         |                             |                         |                           |                         |                       |                         |
| B3LYP           | 2.9                            | 10.5                    | 3.3                       | 10.4                    | 1.7                         | 3.8                     | -1.8                      | 0.0                     | -0.7                  | 0.0                     |
| B3LYP*          | 1.0                            | 9.8                     | 1.5                       | 10.1                    | 0.7                         | 3.5                     | -3.4                      | 0.0                     | -3.6                  | 0.0                     |
| B1LYP           | 4.2                            | 10.7                    | 4.5                       | 10.0                    | 2.6                         | 4.1                     | -0.4                      | 0.0                     | 1.6                   | 0.0                     |
| B1PW91          | -0.1                           | -0.6                    | 2.8                       | 2.5                     | -0.6                        | -2.2                    | -3.7                      | 0.0                     | -4.2                  | 0.0                     |
| BHandH          | -7.1                           | -19.0                   | -3.7                      | -19.0                   | 1.1                         | -4.5                    | -2.6                      | 0.0                     | -7.8                  | 0.0                     |
| BHandHLYP       | 6.8                            | 3.1                     | 7.9                       | 1.2                     | 5.5                         | 2.3                     | 4.3                       | 0.0                     | 8.1                   | 0.0                     |
| KMLYP           | -0.9                           | -12.9                   | 2.3                       | -13.1                   | 3.4                         | -3.0                    | 1.2                       | 0.0                     | -0.1                  | 0.0                     |
| O3LYP           | -21.3                          | -27.7                   | -16.9                     | -23.6                   | -5.6                        | -7.7                    | -13.5                     | 0.0                     | -28.4                 | 0.0                     |
| OPBE0           | 1.8                            | -6.1                    | 6.2                       | 0.0                     | -2.7                        | -7.8                    | -5.1                      | 0.0                     | -4.9                  | 0.0                     |
| PBE0            | -3.1                           | -4.7                    | 0.0                       | -1.5                    | -1.1                        | -3.0                    | -4.6                      | 0.0                     | -7.2                  | 0.0                     |
| mPW1PW          | -1.0                           | -1.0                    | 1.8                       | 1.7                     | -0.3                        | -1.7                    | -3.5                      | 0.0                     | -4.6                  | 0.0                     |
| mPW1K           | 1.0                            | -6.4                    | 4.4                       | -4.3                    | 1.6                         | -3.2                    | -0.3                      | 0.0                     | 0.0                   | 0.0                     |
| S12H            | -3.3                           | -4.9                    | 0.9                       | 0.5                     | -0.2                        | -3.1                    | -2.6                      | 0.0                     | -5.9                  | 0.0                     |
| X3LYP           | 2.1                            | 8.9                     | 2.7                       | 8.6                     | 1.8                         | 3.6                     | -1.7                      | 0.0                     | -1.1                  | 0.0                     |
|                 | <i>Meta-Hybrids</i>            |                         |                           |                         |                             |                         |                           |                         |                       |                         |
| M06             | -0.5                           | 0.1                     | 3.8                       | 6.6                     | 0.4                         | -1.1                    | -1.8                      | 0.0                     | -1.8                  | 0.0                     |
| M06-2X          | -2.1                           | -1.4                    | 2.5                       | -0.9                    | 1.3                         | -0.3                    | -0.5                      | 0.0                     | -1.5                  | 0.0                     |
| M06-HF          | -5.2                           | -1.3                    | 0.8                       | -12.0                   | -0.4                        | 0.9                     | 0.5                       | 0.0                     | 0.6                   | 0.0                     |
| TPSSH           | -2.7                           | 5.1                     | -0.6                      | 6.7                     | -1.7                        | -0.9                    | -4.3                      | 0.0                     | -5.0                  | 0.0                     |
|                 | <i>Double-Hybrids</i>          |                         |                           |                         |                             |                         |                           |                         |                       |                         |
| B2K-PLYP        | -1.6                           | -1.2                    | 0.0                       | 3.8                     | 1.4                         | 0.7                     | -0.8                      | 0.0                     | -1.2                  | 0.0                     |
| B2T-PLYP        | -0.7                           | 2.1                     | 0.5                       | 6.3                     | 1.4                         | 1.6                     | -1.2                      | 0.0                     | -1.2                  | 0.0                     |
| B2-PLYP         | -0.6                           | 4.2                     | 0.3                       | 8.2                     | 1.0                         | 2.2                     | -1.8                      | 0.0                     | -1.9                  | 0.0                     |
| LS1-TPSS        | -5.6                           | -8.5                    | -2.5                      | -0.3                    | -0.5                        | -2.9                    | -2.6                      | 0.0                     | -4.8                  | 0.0                     |
| mPW2K-PLYP      | -2.0                           | -1.4                    | -0.4                      | 3.5                     | 1.5                         | 0.8                     | -0.7                      | 0.0                     | -1.4                  | 0.0                     |
| mPW2-PLYP       | -0.3                           | 3.1                     | 0.6                       | 6.3                     | 1.8                         | 2.3                     | -0.8                      | 0.0                     | -0.8                  | 0.0                     |
| PBE0-DH         | -2.8                           | -8.9                    | 0.7                       | -4.4                    | -0.1                        | -3.9                    | -2.5                      | 0.0                     | -4.3                  | 0.0                     |
| revDSD-BLYP     | -2.8                           | -1.8                    | -1.0                      | 3.4                     | 1.6                         | 1.0                     | 0.1                       | 0.0                     | -1.0                  | 0.0                     |
| revDSD-PBE      | -3.5                           | -4.7                    | -1.1                      | 1.8                     | 0.4                         | -1.3                    | -0.8                      | 0.0                     | -3.0                  | 0.0                     |
| revDSD-PBEP86   | -1.3                           | -2.0                    | 0.6                       | 3.9                     | 1.2                         | -0.4                    | 0.2                       | 0.0                     | -0.8                  | 0.0                     |
|                 | <i>Range-Separated Hybrids</i> |                         |                           |                         |                             |                         |                           |                         |                       |                         |
| CAM-B3LYP       | 3.7                            | 2.4                     | 3.7                       | 1.1                     | 2.6                         | 0.9                     | 0.5                       | 0.0                     | 1.5                   | 0.0                     |
| CAMY-B3LYP      | 1.8                            | 3.3                     | 2.2                       | 2.4                     | 1.9                         | 1.5                     | -0.7                      | 0.0                     | -0.4                  | 0.0                     |
| $\omega$ B97    | 3.3                            | -8.5                    | 4.2                       | -6.4                    | 3.0                         | -5.4                    | 3.4                       | 0.0                     | 3.0                   | 0.0                     |
| $\omega$ B97X   | 2.8                            | -4.6                    | 3.8                       | -3.4                    | 2.5                         | -3.1                    | 2.0                       | 0.0                     | 1.6                   | 0.0                     |
| $\omega$ B97X-D | 3.2                            | -0.1                    | 4.6                       | 0.9                     | 1.2                         | -2.2                    | -0.4                      | 0.0                     | 0.1                   | 0.0                     |

**Table S44 (continued).**

| XC           | Diels-Alder Reaction        |                         | 1,3-dipolar Cycloaddition |                         | Electrocyclic Rearrangement |                         | Sigmatropic Rearrangement |                         | Double Group Transfer |                         |
|--------------|-----------------------------|-------------------------|---------------------------|-------------------------|-----------------------------|-------------------------|---------------------------|-------------------------|-----------------------|-------------------------|
|              | $\Delta E^\ddagger$         | $\Delta E_{\text{rxn}}$ | $\Delta E^\ddagger$       | $\Delta E_{\text{rxn}}$ | $\Delta E^\ddagger$         | $\Delta E_{\text{rxn}}$ | $\Delta E^\ddagger$       | $\Delta E_{\text{rxn}}$ | $\Delta E^\ddagger$   | $\Delta E_{\text{rxn}}$ |
|              | <i>Dispersion-Corrected</i> |                         |                           |                         |                             |                         |                           |                         |                       |                         |
| BP86-D3(BJ)  | -10.6                       | 1.2                     | -7.0                      | 4.9                     | -3.7                        | 0.6                     | -9.1                      | 0.0                     | -15.5                 | 0.0                     |
| BLYP-D3(BJ)  | -6.4                        | 11.8                    | -4.4                      | 13.2                    | -0.9                        | 6.0                     | -5.8                      | 0.0                     | -9.4                  | 0.0                     |
| PBE-D3(BJ)   | -10.5                       | -1.1                    | -6.9                      | 3.4                     | -4.2                        | -0.9                    | -9.5                      | 0.0                     | -16.6                 | 0.0                     |
| OLYP-D3(BJ)  | -11.7                       | -1.8                    | -5.9                      | 4.0                     | -3.8                        | -0.6                    | -9.1                      | 0.0                     | -13.9                 | 0.0                     |
| OPBE-D3(BJ)  | -16.0                       | -13.6                   | -7.4                      | -3.8                    | -7.2                        | -7.4                    | -12.4                     | 0.0                     | -20.2                 | 0.0                     |
| B3LYP-D3(BJ) | -3.6                        | 5.3                     | -1.1                      | 6.1                     | 1.4                         | 3.9                     | -2.4                      | 0.0                     | -4.3                  | 0.0                     |
| PBE0-D3(BJ)  | -6.6                        | -7.4                    | -2.4                      | -3.7                    | -1.3                        | -2.9                    | -4.9                      | 0.0                     | -9.2                  | 0.0                     |
| M06-2X-D3    | -2.3                        | -1.6                    | 2.4                       | -1.0                    | 1.3                         | -0.3                    | -0.5                      | 0.0                     | -1.6                  | 0.0                     |

**Table S45.** Mean error (ME), mean absolute error (MAE), maximum unsigned error (MUE) and standard deviation (SD) of reaction barriers and energies (kcal mol<sup>-1</sup>) for the various pericyclic reactions, computed with XC/QZ4P//BP86-D3(BJ)/QZ4P compared to CCSDT(Q)/CBS//CCSD(T)/cc-pVTZ.

| XC              | $\Delta E^\ddagger$ |      |      |     | $\Delta E_{\text{rxn}}$ |                                |      |     | Total |      |      |     |
|-----------------|---------------------|------|------|-----|-------------------------|--------------------------------|------|-----|-------|------|------|-----|
|                 | ME                  | MAE  | MUE  | SD  | ME                      | MAE                            | MUE  | SD  | ME    | MAE  | MUE  | SD  |
| VWN             | -16.8               | 16.8 | 28.1 | 6.8 | -12.3                   | 12.3                           | 17.5 | 4.8 | -15.1 | 15.1 | 28.1 | 6.5 |
|                 |                     |      |      |     |                         | <i>LDA</i>                     |      |     |       |      |      |     |
|                 |                     |      |      |     |                         | <i>GGAs</i>                    |      |     |       |      |      |     |
| BP86            | -6.4                | 6.4  | 12.1 | 3.5 | 2.8                     | 2.9                            | 8.1  | 3.6 | -3.0  | 5.1  | 12.1 | 3.9 |
| BLYP            | -1.7                | 2.6  | 5.0  | 2.0 | 13.6                    | 13.6                           | 17.9 | 5.8 | 4.0   | 6.7  | 17.9 | 6.6 |
| BEE             | -5.9                | 5.9  | 11.8 | 3.9 | 3.8                     | 5.2                            | 8.9  | 2.8 | -2.3  | 5.6  | 11.8 | 3.5 |
| PW91            | -7.9                | 7.9  | 14.4 | 3.7 | 1.7                     | 2.4                            | 4.8  | 1.7 | -4.3  | 5.9  | 14.4 | 4.1 |
| PBE             | -7.2                | 7.2  | 11.3 | 2.7 | 1.6                     | 2.7                            | 5.1  | 1.7 | -3.9  | 5.5  | 11.3 | 3.2 |
| PBEsol          | -12.7               | 12.7 | 21.8 | 5.1 | -6.4                    | 6.4                            | 9.3  | 2.0 | -10.4 | 10.4 | 21.8 | 5.2 |
| RPBE            | -3.8                | 4.1  | 8.5  | 3.1 | 7.5                     | 7.6                            | 13.1 | 5.4 | 0.4   | 5.4  | 13.1 | 4.5 |
| revPBE          | -4.1                | 4.4  | 9.0  | 3.4 | 6.9                     | 7.3                            | 12.5 | 4.9 | 0.0   | 5.5  | 12.5 | 4.3 |
| mPBE            | -6.8                | 6.8  | 12.8 | 3.6 | 3.2                     | 4.1                            | 7.3  | 2.5 | -3.0  | 5.7  | 12.8 | 3.5 |
| mPW             | -5.8                | 5.8  | 11.3 | 3.4 | 4.9                     | 5.0                            | 9.1  | 3.7 | -1.8  | 5.5  | 11.3 | 3.5 |
| HTBS            | -8.0                | 8.0  | 14.7 | 4.2 | 0.5                     | 3.1                            | 4.8  | 1.8 | -4.8  | 6.1  | 14.7 | 4.2 |
| OLYP            | -0.8                | 4.8  | 6.1  | 1.1 | 1.1                     | 6.7                            | 11.7 | 4.2 | -0.1  | 5.5  | 11.7 | 2.9 |
| OPBE            | -4.9                | 6.3  | 11.2 | 4.0 | -1.0                    | 5.2                            | 8.5  | 3.2 | -3.4  | 5.9  | 11.2 | 3.8 |
| XLYP            | -1.3                | 2.3  | 4.4  | 1.7 | 14.6                    | 14.6                           | 18.8 | 5.9 | 4.7   | 6.9  | 18.8 | 7.1 |
|                 |                     |      |      |     |                         | <i>Meta-GGAs</i>               |      |     |       |      |      |     |
| M06-L           | -1.6                | 2.3  | 4.2  | 1.3 | 3.6                     | 5.3                            | 11.7 | 4.5 | 0.4   | 3.4  | 11.7 | 3.3 |
| MVS             | -5.9                | 5.9  | 13.4 | 5.0 | -1.7                    | 4.5                            | 6.7  | 1.7 | -4.3  | 5.4  | 13.4 | 4.1 |
| TPSS            | -4.6                | 4.6  | 7.3  | 1.8 | 5.2                     | 5.7                            | 9.1  | 3.6 | -0.9  | 5.0  | 9.1  | 2.7 |
| revTPSS         | -4.6                | 4.6  | 5.4  | 0.9 | 3.0                     | 4.5                            | 6.0  | 1.6 | -1.7  | 4.6  | 6.0  | 1.2 |
|                 |                     |      |      |     |                         | <i>Hybrids</i>                 |      |     |       |      |      |     |
| B3LYP           | 1.1                 | 2.0  | 3.4  | 1.0 | 7.8                     | 7.8                            | 10.2 | 3.2 | 3.6   | 4.2  | 10.2 | 3.5 |
| B3LYP*          | -0.8                | 1.9  | 3.5  | 1.3 | 7.4                     | 7.4                            | 9.7  | 3.0 | 2.3   | 4.0  | 9.7  | 3.4 |
| B1LYP           | 2.5                 | 2.7  | 4.6  | 1.6 | 7.9                     | 7.9                            | 10.4 | 3.0 | 4.5   | 4.6  | 10.4 | 3.4 |
| B1PW91          | -1.2                | 2.3  | 4.0  | 1.5 | -0.5                    | 1.9                            | 2.8  | 0.8 | -1.0  | 2.1  | 4.0  | 1.3 |
| BHandH          | -3.9                | 4.3  | 7.6  | 2.6 | -14.3                   | 14.3                           | 19.3 | 6.7 | -7.8  | 8.0  | 19.3 | 6.7 |
| BHandHLYP       | 6.6                 | 6.6  | 8.3  | 1.5 | 2.0                     | 2.0                            | 3.2  | 0.9 | 4.9   | 4.9  | 8.3  | 2.6 |
| KMLYP           | 1.3                 | 1.5  | 3.2  | 1.2 | -9.8                    | 9.8                            | 13.3 | 4.6 | -2.9  | 4.6  | 13.3 | 5.0 |
| O3LYP           | -17.2               | 17.2 | 28.3 | 7.5 | -19.8                   | 19.8                           | 28.1 | 9.1 | -18.2 | 18.2 | 28.3 | 8.2 |
| OPBE0           | -1.1                | 4.2  | 6.1  | 1.5 | -5.5                    | 5.5                            | 8.8  | 3.2 | -2.8  | 4.7  | 8.8  | 2.4 |
| PBE0            | -3.3                | 3.3  | 7.1  | 2.5 | -3.5                    | 3.5                            | 5.0  | 1.2 | -3.4  | 3.4  | 7.1  | 2.1 |
| mPW1PW          | -1.6                | 2.3  | 4.5  | 1.5 | -0.8                    | 1.6                            | 2.2  | 0.4 | -1.3  | 2.0  | 4.5  | 1.2 |
| mPW1K           | -3.3                | 3.3  | 7.1  | 2.5 | -3.5                    | 3.5                            | 5.0  | 1.2 | -3.4  | 3.4  | 7.1  | 2.1 |
| S12H            | -2.3                | 2.7  | 6.0  | 1.9 | -3.3                    | 3.3                            | 5.6  | 2.2 | -2.7  | 2.9  | 6.0  | 2.1 |
| X3LYP           | 0.7                 | 1.8  | 2.7  | 0.6 | 6.6                     | 6.6                            | 8.6  | 2.5 | 2.9   | 3.6  | 8.6  | 2.8 |
|                 |                     |      |      |     |                         | <i>Meta-Hybrids</i>            |      |     |       |      |      |     |
| M06             | 0.0                 | 1.6  | 3.9  | 1.4 | 1.6                     | 2.6                            | 6.2  | 2.6 | 0.6   | 1.9  | 6.2  | 2.0 |
| M06-2X          | 0.3                 | 1.5  | 2.7  | 0.7 | -0.8                    | 0.8                            | 1.1  | 0.2 | -0.2  | 1.3  | 2.7  | 0.7 |
| M06-HF          | -1.1                | 1.5  | 5.8  | 2.1 | -3.8                    | 4.4                            | 11.6 | 5.1 | -2.1  | 2.6  | 11.6 | 3.8 |
| TPSSH           | -3.0                | 3.0  | 5.0  | 1.5 | 3.0                     | 4.0                            | 6.0  | 1.8 | -0.8  | 3.4  | 6.0  | 1.7 |
|                 |                     |      |      |     |                         | <i>Double-Hybrids</i>          |      |     |       |      |      |     |
| B2K-PLYP        | -0.2                | 1.2  | 1.8  | 0.4 | 1.1                     | 1.7                            | 3.6  | 1.3 | 0.3   | 1.4  | 3.6  | 0.9 |
| B2T-PLYP        | 0.0                 | 0.6  | 0.9  | 0.3 | 3.3                     | 3.3                            | 6.1  | 2.0 | 1.2   | 1.6  | 6.1  | 1.8 |
| B2-PLYP         | -0.5                | 0.7  | 1.7  | 0.5 | 4.7                     | 4.7                            | 8.0  | 2.5 | 1.5   | 2.2  | 8.0  | 2.5 |
| LS1-TPSS        | -2.6                | 3.4  | 5.5  | 1.6 | -3.9                    | 3.9                            | 8.2  | 3.1 | -3.1  | 3.6  | 8.2  | 2.3 |
| mPW2K-PLYP      | -0.3                | 1.4  | 1.9  | 0.3 | 1.0                     | 1.7                            | 3.3  | 1.1 | 0.2   | 1.5  | 3.3  | 0.7 |
| mPW2-PLYP       | 0.3                 | 0.6  | 1.4  | 0.4 | 3.8                     | 3.8                            | 6.1  | 1.6 | 1.6   | 1.8  | 6.1  | 1.9 |
| PBE0-DH         | -1.7                | 1.9  | 4.1  | 1.4 | -5.9                    | 5.9                            | 8.8  | 2.0 | -3.3  | 3.4  | 8.8  | 2.5 |
| revDSD-BLYP     | -0.2                | 1.6  | 2.4  | 0.7 | 1.3                     | 1.9                            | 3.6  | 1.2 | 0.4   | 1.7  | 3.6  | 0.9 |
| revDSD-PBE      | -1.1                | 1.7  | 2.9  | 1.0 | -1.0                    | 2.3                            | 3.8  | 1.1 | -1.1  | 1.9  | 3.8  | 1.1 |
| revDSD-PBEP86   | 0.5                 | 0.8  | 2.4  | 0.8 | 1.0                     | 1.8                            | 4.2  | 1.7 | 0.7   | 1.2  | 4.2  | 1.3 |
|                 |                     |      |      |     |                         | <i>Range-Separated Hybrids</i> |      |     |       |      |      |     |
| CAM-B3LYP       | 2.4                 | 2.4  | 3.7  | 1.3 | 1.4                     | 1.4                            | 2.4  | 0.7 | 2.0   | 2.0  | 3.7  | 1.2 |
| CAMY-B3LYP      | 1.0                 | 1.4  | 2.2  | 0.7 | 2.4                     | 2.4                            | 3.3  | 0.7 | 1.5   | 1.8  | 3.3  | 0.9 |
| $\omega$ B97    | 3.4                 | 3.4  | 4.2  | 0.5 | -6.7                    | 6.7                            | 8.5  | 1.3 | -0.4  | 4.6  | 8.5  | 1.8 |
| $\omega$ B97X   | 2.5                 | 2.5  | 3.8  | 0.8 | -3.7                    | 3.7                            | 4.6  | 0.6 | 0.2   | 3.0  | 4.6  | 0.9 |
| $\omega$ B97X-D | 1.7                 | 1.9  | 4.6  | 1.8 | -0.4                    | 1.0                            | 2.2  | 0.9 | 0.9   | 1.6  | 4.6  | 1.5 |

**Table S45** (continued).

| XC           | $\Delta E^\ddagger$         |      |      |     | $\Delta E_{\text{rxn}}$ |     |      |     | Total |      |      |     |
|--------------|-----------------------------|------|------|-----|-------------------------|-----|------|-----|-------|------|------|-----|
|              | ME                          | MAE  | MUE  | SD  | ME                      | MAE | MUE  | SD  | ME    | MAE  | MUE  | SD  |
|              | <i>Dispersion-Corrected</i> |      |      |     |                         |     |      |     |       |      |      |     |
| BP86-D3(BJ)  | -9.3                        | 9.3  | 15.5 | 3.8 | 1.5                     | 1.6 | 4.2  | 1.9 | -5.2  | 6.4  | 15.5 | 5.0 |
| BLYP-D3(BJ)  | -5.5                        | 5.5  | 9.4  | 2.7 | 9.8                     | 9.8 | 12.7 | 3.1 | 0.2   | 7.1  | 12.7 | 3.5 |
| PBE-D3(BJ)   | -9.7                        | 9.7  | 16.6 | 4.0 | -0.3                    | 2.0 | 2.6  | 0.4 | -6.2  | 6.8  | 16.6 | 4.9 |
| OLYP-D3(BJ)  | -9.2                        | 9.2  | 14.1 | 3.6 | -0.4                    | 2.4 | 3.0  | 0.6 | -5.9  | 6.6  | 14.1 | 4.4 |
| OPBE-D3(BJ)  | -12.6                       | 12.6 | 20.3 | 5.0 | -8.8                    | 8.8 | 13.7 | 3.5 | -11.2 | 11.2 | 20.3 | 4.8 |
| B3LYP-D3(BJ) | -2.0                        | 2.5  | 4.2  | 1.3 | 4.7                     | 4.7 | 5.8  | 1.0 | 0.5   | 3.3  | 5.8  | 1.6 |
| PBE0-D3(BJ)  | -4.9                        | 4.9  | 9.1  | 2.7 | -5.2                    | 5.2 | 7.8  | 1.9 | -5.0  | 5.0  | 9.1  | 2.4 |
| M06-2X-D3    | 0.0                         | 1.5  | 2.6  | 0.8 | -0.9                    | 0.9 | 1.2  | 0.2 | -0.3  | 1.2  | 2.6  | 0.7 |

**Table S46.** Multireference diagnostics for each of the pericyclic stationary points at the CCSD(T)/cc-pVTZ level of theory

| Species          | T <sub>1</sub><br>Diagnostic | Largest T <sub>2</sub><br>Amplitude |
|------------------|------------------------------|-------------------------------------|
| <b>B</b>         | 0.011                        | -0.090                              |
| <b>E</b>         | 0.011                        | -0.120                              |
| <b>MA</b>        | 0.018                        | -0.073                              |
| <b>P</b>         | 0.011                        | -0.083                              |
| <b>Et</b>        | 0.008                        | 0.000                               |
| <b>TS-DA</b>     | 0.010                        | -0.078                              |
| <b>P-DA</b>      | 0.010                        | -0.051                              |
| <b>TS-1,3-DC</b> | 0.016                        | -0.049                              |
| <b>P-1,3-DC</b>  | 0.014                        | -0.030                              |
| <b>TS-SR</b>     | 0.011                        | -0.093                              |
| <b>TS-ER</b>     | 0.011                        | -0.113                              |
| <b>P-ER</b>      | 0.010                        | -0.107                              |
| <b>TS-DGT</b>    | 0.009                        | -0.089                              |



**Table S47.** Standard Dunning basis raw electronic energies atop the CCSD(T)/cc-pVTZ structures for use in Focal Point analysis

**B**

|                                                | RHF          | MP2          | CCSD         | CCSD(T)      | CCSDT        | CCSDT(Q)     |
|------------------------------------------------|--------------|--------------|--------------|--------------|--------------|--------------|
| cc-pVDZ                                        | -154.9288987 | -155.4643094 | -155.5109513 | -155.5326566 | -155.5336371 | -155.5351984 |
| cc-pVTZ                                        | -154.9714046 | -155.6231795 | -155.6589972 | -155.6913388 |              |              |
| cc-pVQZ                                        | -154.9813853 | -155.6734250 | -155.7010477 | -155.7360870 |              |              |
| cc-pV5Z                                        | -154.9838188 | -155.6910929 |              |              |              |              |
| $E(\text{FC-CCSD(T)/cc-pCVTZ}) = -155.6960772$ |              |              |              |              |              |              |
| $E(\text{AE-CCSD(T)/cc-pCVTZ}) = -155.8950888$ |              |              |              |              |              |              |

**trans-B**

|         | RHF          | MP2          | CCSD         | CCSD(T)      | CCSDT        | CCSDT(Q)     |
|---------|--------------|--------------|--------------|--------------|--------------|--------------|
| cc-pVDZ | -154.9341826 | -155.4689579 | -155.5154742 | -155.5373092 | -155.5383244 | -155.5398930 |
| cc-pVTZ | -154.9769368 | -155.6278093 | -155.6635330 | -155.6959336 |              |              |
| cc-pVQZ | -154.9869492 | -155.6780758 | -155.7056171 | -155.7407116 |              |              |
| cc-pV5Z | -154.9893903 | -155.6957483 |              |              |              |              |

**E**

|                                                | RHF         | MP2         | CCSD        | CCSD(T)     | CCSDT       | CCSDT(Q)    |
|------------------------------------------------|-------------|-------------|-------------|-------------|-------------|-------------|
| cc-pVDZ                                        | -78.0398309 | -78.3148492 | -78.3450186 | -78.3548453 | -78.3554769 | -78.3561073 |
| cc-pVTZ                                        | -78.0635295 | -78.3992523 | -78.4237557 | -78.4388035 |             |             |
| cc-pVQZ                                        | -78.0688081 | -78.4251777 | -78.4453630 | -78.4617267 |             |             |
| cc-pV5Z                                        | -78.0701501 | -78.4342943 |             |             |             |             |
| $E(\text{FC-CCSD(T)/cc-pCVTZ}) = -78.44112367$ |             |             |             |             |             |             |
| $E(\text{AE-CCSD(T)/cc-pCVTZ}) = -78.54059175$ |             |             |             |             |             |             |

**MA**

|                                                | RHF          | MP2          | CCSD         | CCSD(T)      | CCSDT        | CCSDT(Q)     |
|------------------------------------------------|--------------|--------------|--------------|--------------|--------------|--------------|
| cc-pVDZ                                        | -202.8830963 | -203.5330477 | -203.5409648 | -203.5703363 | -203.5702344 | -203.5740625 |
| cc-pVTZ                                        | -202.9398678 | -203.7289180 | -203.7256379 | -203.7684651 |              |              |
| cc-pVQZ                                        | -202.9540497 | -203.7937466 | -203.7821439 | -203.8285177 |              |              |
| cc-pV5Z                                        | -202.9573898 | -203.8170967 |              |              |              |              |
| $E(\text{FC-CCSD(T)/cc-pCVTZ}) = -203.7769782$ |              |              |              |              |              |              |
| $E(\text{AE-CCSD(T)/cc-pCVTZ}) = -203.9820051$ |              |              |              |              |              |              |

**P**

|                                                | RHF          | MP2          | CCSD         | CCSD(T)      | CCSDT        | CCSDT(Q)     |
|------------------------------------------------|--------------|--------------|--------------|--------------|--------------|--------------|
| cc-pVDZ                                        | -193.9675307 | -194.6476637 | -194.7059797 | -194.7328522 | -194.7339521 | -194.7358514 |
| cc-pVTZ                                        | -194.0201477 | -194.8483264 | -194.8930656 | -194.9332918 |              |              |
| cc-pVQZ                                        | -194.0325070 | -194.9115957 | -194.9460874 | -194.9896902 |              |              |
| cc-pV5Z                                        | -194.0355025 | -194.9337951 |              |              |              |              |
| $E(\text{FC-CCSD(T)/cc-pCVTZ}) = -194.9391704$ |              |              |              |              |              |              |
| $E(\text{AE-CCSD(T)/cc-pCVTZ}) = -195.1880501$ |              |              |              |              |              |              |

**trans-P**

|         | RHF          | MP2          | CCSD         | CCSD(T)      | CCSDT        | CCSDT(Q)     |
|---------|--------------|--------------|--------------|--------------|--------------|--------------|
| cc-pVDZ | -193.9732386 | -194.6520861 | -194.7104398 | -194.7373793 | -194.7385396 | -194.7404453 |
| cc-pVTZ | -194.0261060 | -194.8527622 | -194.8975974 | -194.9378227 |              |              |
| cc-pVQZ | -194.0385274 | -194.9160736 | -194.9506829 | -194.9942793 |              |              |
| cc-pV5Z | -194.0415550 | -194.9382951 |              |              |              |              |

**E**

|                                                | RHF         | MP2         | CCSD        | CCSD(T)     | CCSDT       | CCSDT(Q)    |
|------------------------------------------------|-------------|-------------|-------------|-------------|-------------|-------------|
| cc-pVDZ                                        | -79.2349329 | -79.5370245 | -79.5740384 | -79.5823175 | -79.5829471 | -79.5833399 |
| cc-pVTZ                                        | -79.2597874 | -79.6298460 | -79.6609679 | -79.6744450 |             |             |
| cc-pVQZ                                        | -79.2650239 | -79.6573473 | -79.6839574 | -79.6987107 |             |             |
| cc-pV5Z                                        | -79.2663607 | -79.6669257 |             |             |             |             |
| <hr/>                                          |             |             |             |             |             |             |
| $E(\text{FC-CCSD(T)/cc-pCVTZ}) = -79.6765236$  |             |             |             |             |             |             |
| $E(\text{AE-CCSD(T)/cc-pCVTZ}) = -79.77616799$ |             |             |             |             |             |             |

**TS-DA**

|                                                | RHF          | MP2          | CCSD         | CCSD(T)      | CCSDT        | CCSDT(Q)     |
|------------------------------------------------|--------------|--------------|--------------|--------------|--------------|--------------|
| cc-pVDZ                                        | -232.8992400 | -233.7594060 | -233.8145528 | -233.8538137 | -233.8546886 | -233.8577275 |
| cc-pVTZ                                        | -232.9632774 | -234.0059838 | -234.0423793 | -234.0987534 |              |              |
| cc-pVQZ                                        | -232.9779710 | -234.0825452 | -234.1060104 | -234.1667246 |              |              |
| cc-pV5Z                                        | -232.9815375 | -234.1094328 |              |              |              |              |
| <hr/>                                          |              |              |              |              |              |              |
| $E(\text{FC-CCSD(T)/cc-pCVTZ}) = -234.1056506$ |              |              |              |              |              |              |
| $E(\text{AE-CCSD(T)/cc-pCVTZ}) = -234.4039487$ |              |              |              |              |              |              |

**P-DA**

|                                                | RHF          | MP2          | CCSD         | CCSD(T)      | CCSDT        | CCSDT(Q)     |
|------------------------------------------------|--------------|--------------|--------------|--------------|--------------|--------------|
| cc-pVDZ                                        | -233.0367972 | -233.8662585 | -233.9346806 | -233.9655017 | -233.9665604 | -233.9685235 |
| cc-pVTZ                                        | -233.0975504 | -234.1064229 | -234.1591461 | -234.2058720 |              |              |
| cc-pVQZ                                        | -233.1120132 | -234.1825879 | -234.2232204 | -234.2739459 |              |              |
| cc-pV5Z                                        | -233.1154795 | -234.2093095 |              |              |              |              |
| <hr/>                                          |              |              |              |              |              |              |
| $E(\text{FC-CCSD(T)/cc-pCVTZ}) = -234.2126671$ |              |              |              |              |              |              |
| $E(\text{AE-CCSD(T)/cc-pCVTZ}) = -234.5114888$ |              |              |              |              |              |              |

**TS-1,3-DC**

|                                                | RHF          | MP2          | CCSD         | CCSD(T)      | CCSDT        | CCSDT(Q)     |
|------------------------------------------------|--------------|--------------|--------------|--------------|--------------|--------------|
| cc-pVDZ                                        | -280.8602834 | -281.8294441 | -281.8500866 | -281.8966775 | -281.8960871 | -281.9018519 |
| cc-pVTZ                                        | -280.9348921 | -282.1101293 | -282.1108629 | -282.1775562 |              |              |
| cc-pVQZ                                        | -280.9536608 | -282.2014120 | -282.1889078 | -282.2608781 |              |              |
| cc-pV5Z                                        | -280.9580912 | -282.2342253 |              |              |              |              |
| <hr/>                                          |              |              |              |              |              |              |
| $E(\text{FC-CCSD(T)/cc-pCVTZ}) = -282.1879762$ |              |              |              |              |              |              |
| $E(\text{AE-CCSD(T)/cc-pCVTZ}) = -282.4920985$ |              |              |              |              |              |              |

**P-1,3-DC**

|                                                | RHF          | MP2          | CCSD         | CCSD(T)      | CCSDT        | CCSDT(Q)     |
|------------------------------------------------|--------------|--------------|--------------|--------------|--------------|--------------|
| cc-pVDZ                                        | -280.9712756 | -281.8865515 | -281.9340761 | -281.9703206 | -281.9706691 | -281.9740902 |
| cc-pVTZ                                        | -281.0462135 | -282.1665370 | -282.1966583 | -282.2519795 |              |              |
| cc-pVQZ                                        | -281.0654252 | -282.2585138 | -282.2760870 | -282.3363554 |              |              |
| cc-pV5Z                                        | -281.0700200 | -282.2916434 |              |              |              |              |
| <hr/>                                          |              |              |              |              |              |              |
| $E(\text{FC-CCSD(T)/cc-pCVTZ}) = -282.2620123$ |              |              |              |              |              |              |
| $E(\text{AE-CCSD(T)/cc-pCVTZ}) = -282.5664449$ |              |              |              |              |              |              |

**TS-ER**

|                                                | RHF          | MP2          | CCSD         | CCSD(T)      | CCSDT        | CCSDT(Q)     |
|------------------------------------------------|--------------|--------------|--------------|--------------|--------------|--------------|
| cc-pVDZ                                        | -154.8389905 | -155.3986728 | -155.4374530 | -155.4633722 | -155.4640989 | -155.4661160 |
| cc-pVTZ                                        | -154.8811466 | -155.5584944 | -155.5851977 | -155.6222873 |              |              |
| cc-pVQZ                                        | -154.8910071 | -155.6088533 | -155.6270821 | -155.6669968 |              |              |
| cc-pV5Z                                        | -154.8934213 | -155.6266140 |              |              |              |              |
| <hr/>                                          |              |              |              |              |              |              |
| $E(\text{FC-CCSD(T)/cc-pCVTZ}) = -155.6269212$ |              |              |              |              |              |              |
| $E(\text{AE-CCSD(T)/cc-pCVTZ}) = -155.8256164$ |              |              |              |              |              |              |

**P-ER**

|         | RHF          | MP2          | CCSD         | CCSD(T)      | CCSDT        | CCSDT(Q)     |
|---------|--------------|--------------|--------------|--------------|--------------|--------------|
| cc-pVDZ | -154.9117217 | -155.4552121 | -155.4984332 | -155.5196265 | -155.5203062 | -155.5218180 |
| cc-pVTZ | -154.9526202 | -155.6130015 | -155.6456912 | -155.6776100 |              |              |
| cc-pVQZ | -154.9623458 | -155.6633752 | -155.6880868 | -155.7226899 |              |              |
| cc-pV5Z | -154.9646733 | -155.6811429 |              |              |              |              |

$E(\text{FC-CCSD(T)/cc-pCVTZ}) = -155.6822329$   
 $E(\text{AE-CCSD(T)/cc-pCVTZ}) = -155.8812007$

**TS-SR**

|         | RHF          | MP2          | CCSD         | CCSD(T)      | CCSDT        | CCSDT(Q)     |
|---------|--------------|--------------|--------------|--------------|--------------|--------------|
| cc-pVDZ | -193.8816627 | -194.5983275 | -194.6415675 | -194.6741341 | -194.6748017 | -194.6773575 |
| cc-pVTZ | -193.9325727 | -194.7990793 | -194.8275651 | -194.8743033 |              |              |
| cc-pVQZ | -193.9448486 | -194.8626389 | -194.8806682 | -194.9309717 |              |              |
| cc-pV5Z | -193.9478418 | -194.8848894 |              |              |              |              |

$E(\text{FC-CCSD(T)/cc-pCVTZ}) = -194.8801141$   
 $E(\text{AE-CCSD(T)/cc-pCVTZ}) = -195.1288721$

**TS-DGT**

|         | RHF          | MP2          | CCSD         | CCSD(T)      | CCSDT        | CCSDT(Q)     |
|---------|--------------|--------------|--------------|--------------|--------------|--------------|
| cc-pVDZ | -157.1471812 | -157.7830069 | -157.8302236 | -157.8558066 | -157.8565883 | -157.8585055 |
| cc-pVTZ | -157.1926246 | -157.9612959 | -157.9948921 | -158.0325438 |              |              |
| cc-pVQZ | -157.2026964 | -158.0151958 | -158.0395703 | -158.0802108 |              |              |
| cc-pV5Z | -157.2052153 | -158.0337998 |              |              |              |              |

$E(\text{FC-CCSD(T)/cc-pCVTZ}) = -158.036793$   
 $E(\text{AE-CCSD(T)/cc-pCVTZ}) = -158.235902$

**Table S48.** Aug' basis raw electronic energies atop the CCSD(T)/cc-pVTZ structures for use in Focal Point analysis

**B**

|              | RHF          | MP2          | CCSD         | CCSD(T)      |
|--------------|--------------|--------------|--------------|--------------|
| aug'-cc-pVDZ | -154.9332966 | -155.4848185 | -155.5297139 | -155.5538307 |
| aug'-cc-pVTZ | -154.9726010 | -155.6315664 | -155.6661443 | -155.6994119 |
| aug'-cc-pVQZ | -154.9818063 | -155.6773817 | -155.7038498 | -155.7392358 |
| aug'-cc-pV5Z | -154.9838710 | -155.6929894 |              |              |

**trans-B**

|              | RHF          | MP2          | CCSD         | CCSD(T)      |
|--------------|--------------|--------------|--------------|--------------|
| aug'-cc-pVDZ | -154.9388329 | -155.4896435 | -155.5343688 | -155.5585730 |
| aug'-cc-pVTZ | -154.9781644 | -155.6361878 | -155.6706652 | -155.7039922 |
| aug'-cc-pVQZ | -154.9873795 | -155.6820473 | -155.7084341 | -155.7438785 |
| aug'-cc-pV5Z | -154.9894482 | -155.6976627 |              |              |

**E**

|              | RHF         | MP2         | CCSD        | CCSD(T)     |
|--------------|-------------|-------------|-------------|-------------|
| aug'-cc-pVDZ | -78.0425010 | -78.3253851 | -78.3548073 | -78.3657735 |
| aug'-cc-pVTZ | -78.0642344 | -78.4031459 | -78.4270781 | -78.4425588 |
| aug'-cc-pVQZ | -78.0690579 | -78.4270457 | -78.4466747 | -78.4631981 |
| aug'-cc-pV5Z | -78.0701799 | -78.4351828 |             |             |

**MA**

|              | RHF          | MP2          | CCSD         | CCSD(T)      |
|--------------|--------------|--------------|--------------|--------------|
| aug'-cc-pVDZ | -202.8953823 | -203.5679612 | -203.5746089 | -203.6073716 |
| aug'-cc-pVTZ | -202.9424350 | -203.7434969 | -203.7387201 | -203.7830631 |
| aug'-cc-pVQZ | -202.9548516 | -203.8003674 | -203.7872330 | -203.8341865 |
| aug'-cc-pV5Z | -202.9575278 | -203.8202676 |              |              |

**P**

|              | RHF          | MP2          | CCSD         | CCSD(T)      |
|--------------|--------------|--------------|--------------|--------------|
| aug'-cc-pVDZ | -193.9725624 | -194.6735229 | -194.7298726 | -194.7597830 |
| aug'-cc-pVTZ | -194.0214524 | -194.8588343 | -194.9021762 | -194.9435512 |
| aug'-cc-pVQZ | -194.0329635 | -194.9164543 | -194.9495737 | -194.9936064 |
| aug'-cc-pV5Z | -194.0355593 | -194.9361400 |              |              |

**trans-P**

|              | RHF          | MP2          | CCSD         | CCSD(T)      |
|--------------|--------------|--------------|--------------|--------------|
| aug'-cc-pVDZ | -193.9784928 | -194.6781347 | -194.7344836 | -194.7644244 |
| aug'-cc-pVTZ | -194.0275052 | -194.8633009 | -194.9067348 | -194.9481079 |
| aug'-cc-pVQZ | -194.0390147 | -194.9209658 | -194.9542004 | -194.9982289 |
| aug'-cc-pV5Z | -194.0416194 | -194.9406599 |              |              |

**Et**

|              | RHF         | MP2         | CCSD        | CCSD(T)     |
|--------------|-------------|-------------|-------------|-------------|
| aug'-cc-pVDZ | -79.2362457 | -79.5470023 | -79.5840179 | -79.5933922 |
| aug'-cc-pVTZ | -79.2600623 | -79.6333060 | -79.6642428 | -79.6780935 |
| aug'-cc-pVQZ | -79.2651126 | -79.6588848 | -79.6851146 | -79.7000040 |
| aug'-cc-pV5Z | -79.2663736 | -79.6676808 |             |             |

**TS-DA**

|              | RHF          | MP2          | CCSD         | CCSD(T)      |
|--------------|--------------|--------------|--------------|--------------|
| aug'-cc-pVDZ | -232.9066197 | -233.7960667 | -233.8474308 | -233.8910377 |
| aug'-cc-pVTZ | -232.9649694 | -234.0200174 | -234.0544235 | -234.1123808 |
| aug'-cc-pVQZ | -232.9785247 | -234.0889540 | -234.1106322 | -234.1719443 |
| aug'-cc-pV5Z | -232.9816192 | -234.1124592 |              |              |

**P-DA**

|              | RHF          | MP2          | CCSD         | CCSD(T)      |
|--------------|--------------|--------------|--------------|--------------|
| aug'-cc-pVDZ | -233.0430730 | -233.8960669 | -233.9629866 | -233.9972720 |
| aug'-cc-pVTZ | -233.0986939 | -234.1187808 | -234.1702163 | -234.2182312 |
| aug'-cc-pVQZ | -233.1124370 | -234.1882681 | -234.2274236 | -234.2786402 |
| aug'-cc-pV5Z | -233.1155323 | -234.2121270 |              |              |

**TS-1,3DC**

|              | RHF          | MP2          | CCSD         | CCSD(T)      |
|--------------|--------------|--------------|--------------|--------------|
| aug'-cc-pVDZ | -280.8731801 | -281.8809755 | -281.8974282 | -281.9499069 |
| aug'-cc-pVTZ | -280.9377924 | -282.1308842 | -282.1291319 | -282.1981652 |
| aug'-cc-pVQZ | -280.9545970 | -282.2108402 | -282.1960750 | -282.2689429 |
| aug'-cc-pV5Z | -280.9582268 | -282.2386580 |              |              |

**P-1,3DC**

|              | RHF          | MP2          | CCSD         | CCSD(T)      |
|--------------|--------------|--------------|--------------|--------------|
| aug'-cc-pVDZ | -280.9874944 | -281.9373642 | -281.9825142 | -282.0240380 |
| aug'-cc-pVTZ | -281.0496008 | -282.1869000 | -282.2150866 | -282.2724401 |
| aug'-cc-pVQZ | -281.0665382 | -282.2676834 | -282.2832425 | -282.3443081 |
| aug'-cc-pV5Z | -281.0701717 | -282.2959322 |              |              |

**TS-ER**

|              | RHF          | MP2          | CCSD         | CCSD(T)      |
|--------------|--------------|--------------|--------------|--------------|
| aug'-cc-pVDZ | -154.8442958 | -155.4206842 | -155.4573071 | -155.4858028 |
| aug'-cc-pVTZ | -154.8824792 | -155.5674822 | -155.5928330 | -155.6308903 |
| aug'-cc-pVQZ | -154.8914544 | -155.6130433 | -155.6300545 | -155.6703426 |
| aug'-cc-pV5Z | -154.8934775 | -155.6286084 |              |              |

**P-ER**

|              | RHF          | MP2          | CCSD         | CCSD(T)      |
|--------------|--------------|--------------|--------------|--------------|
| aug'-cc-pVDZ | -154.9159091 | -155.4737916 | -155.5161264 | -155.5396371 |
| aug'-cc-pVTZ | -154.9535162 | -155.6210696 | -155.6528768 | -155.6856475 |
| aug'-cc-pVQZ | -154.9626740 | -155.6672442 | -155.6909212 | -155.7258575 |
| aug'-cc-pV5Z | -154.9647154 | -155.6830324 |              |              |

**TS-SR**

|              | RHF          | MP2          | CCSD         | CCSD(T)      |
|--------------|--------------|--------------|--------------|--------------|
| aug'-cc-pVDZ | -193.8869737 | -194.6249764 | -194.6657623 | -194.7015552 |
| aug'-cc-pVTZ | -193.9339631 | -194.8098697 | -194.8368913 | -194.8848240 |
| aug'-cc-pVQZ | -193.9453517 | -194.8675958 | -194.8842420 | -194.9349899 |
| aug'-cc-pV5Z | -193.9479093 | -194.8872785 |              |              |

**TS-DGT**

|              | RHF          | MP2          | CCSD         | CCSD(T)      |
|--------------|--------------|--------------|--------------|--------------|
| aug'-cc-pVDZ | -157.1511377 | -157.8061977 | -157.8518762 | -157.8803342 |
| aug'-cc-pVTZ | -157.1933888 | -157.9694211 | -158.0021776 | -158.0408038 |
| aug'-cc-pVQZ | -157.2029645 | -158.0187245 | -158.0421527 | -158.0831279 |
| aug'-cc-pV5Z | -157.2052578 | -158.0355264 |              |              |
